# Supplementary material for: Unravelling the evolution of nickel-catalyzed C–O bond activation with data-driven strategies
Source: Royal Society of Chemistry journal article supplement (doi:10.1039/d5qo00947b), 2025-10-14
Supplement: d5qo00947b2.xlsx [file d5qo00947b2.xlsx]

## Sheet: Paper DOIs
Article ID	Direct Object Identifier
CO001	10.1021/acscatal.1c04800
CO002	10.1021/acscatal.5b01021
CO003	10.1021/acscatal.6b00801
CO004	10.1021/acscatal.7b00941
CO005	10.1021/acscatal.7b02618
CO006	10.1021/acscatal.7b04030
CO007	10.1021/acscatal.8b03436
CO008	10.1002/anie.200453765
CO009	10.1002/anie.200801447
CO010	10.1002/anie.200803814
CO011	10.1002/anie.200907359
CO012	10.1002/chem.201003403
CO013	10.1002/anie.201101461
CO014	10.1002/anie.201202527
CO015	10.1002/anie.201308391
CO016	10.1002/anie.201308666
CO017	10.1002/anie.201403823
CO018	10.1002/anie.201412051
CO019	10.1002/anie.201507494
CO020	10.1002/anie.201508757
CO021	10.1002/anie.201607646
CO022	10.1002/anie.201710241
CO023	10.1002/anie.202011036
CO024	10.1002/anie.202103327
CO025	10.1039/b609064h
CO026	10.1039/b718998b
CO027	10.1039/b803072c
CO028	10.1039/c0cc03107k
CO029	10.1039/c1cc11193k
CO030	10.1039/c3cc46663a
CO031	10.1039/c4cc08426h
CO032	10.1039/c7cc06717h
CO033	10.1021/acs.organomet.9b00543
CO034	10.1039/d1cc00634g
CO035	10.1039/c39810000313
CO036	10.1039/c39830000112
CO037	10.1039/c39940001789
CO038	10.1039/c1sc00026h
CO039	10.1039/c5sc02942b
CO040	10.1039/c7sc05216b
CO041	10.1021/ja00132a039
CO042	10.1021/ja00502a074
CO043	10.1021/ja038752r
CO044	10.1021/ja074453g
CO045	10.1021/ja101186p
CO046	10.1021/ja108547u
CO047	10.1021/ja200398c
CO048	10.1021/ja202769t
CO049	10.1021/ja2084509
CO050	10.1021/ja210249h
CO051	10.1021/ja300031w
CO052	10.1021/ja307045r
CO053	10.1021/ja311783k
CO054	10.1021/ja4034999
CO055	10.1021/ja408561b
CO056	10.1021/ja5026485
CO057	10.1021/ja5076426
CO058	10.1021/ja710944j
CO059	10.1021/ja8056503
CO060	10.1021/ja806244b
CO061	10.1021/ja903091g
CO062	10.1021/ja906477r
CO063	10.1021/ja907700e
CO064	10.1021/jacs.0c06995
CO065	10.1021/jacs.1c08399
CO066	10.1021/jacs.1c09797
CO067	10.1021/jacs.6b03253
CO068	10.1021/jacs.6b08075
CO069	10.1021/jacs.6b11412
CO070	10.1021/jacs.7b12865
CO071	10.1021/jacs.8b02134
CO072	10.1021/jacs.8b13403
CO073	10.1021/jacs.9b00097
CO074	10.1038/nchem.2741
CO075	10.1038/s41467-020-20725-9
CO076	10.1002/adsc.200404150
CO077	10.1002/adsc.201000710
CO078	10.1002/adsc.201100151
CO079	10.1002/adsc.201100241
CO080	10.1246/cl.2005.796
CO081	10.1246/cl.2011.1001
CO082	10.1246/cl.2011.913
CO083	10.1002/chem.200902785
CO084	10.1002/chem.201000420
CO085	10.1002/chem.201103784
CO086	10.1002/ejic.201900692
CO087	10.1002/ejoc.200900067
CO088	10.1002/ejoc.201000147
CO089	10.1002/ejoc.201001519
CO090	10.1002/ejoc.201200444
CO091	10.1002/hlca.19800630427
CO092	10.1021/acs.joc.6b01627
CO093	10.1021/acs.joc.6b02564
CO094	10.1021/jo00109a044
CO095	10.1021/jo00126a047
CO096	10.1021/jo010452+
CO097	10.1021/jo049940i
CO098	10.1021/jo070912k
CO099	10.1021/jo1024464
CO100	10.1021/jo2000034
CO101	10.1021/jo202037x
CO102	10.1021/jo2022982
CO103	10.1021/jo3001194
CO104	10.1021/jo300547v
CO105	10.1021/jo4005537
CO106	10.1021/jo982060h
CO107	10.1016/s0022-328x(00)00164-9
CO108	10.1016/s0022-328x(02)01174-9
CO109	10.1039/a908076g
CO110	10.1039/b002547j
CO111	10.1021/acs.orglett.5b02200
CO112	10.1021/acs.orglett.5b03151
CO113	10.1021/acs.orglett.6b00819
CO114	10.1021/acs.orglett.6b01398
CO115	10.1021/ol016526l
CO116	10.1021/ol050393c
CO117	10.1021/ol101592r
CO118	10.1021/ol201248c
CO119	10.1021/ol203322v
CO120	10.1021/ol300364s
CO121	10.1021/ol300891k
CO122	10.1021/ol302112q
CO123	10.1021/ol4011757
CO124	10.1021/ol401727y
CO125	10.1021/ol4031364
CO126	10.1021/ol5016724
CO127	10.1021/ol501707z
CO128	10.1021/ol502583h
CO129	10.1021/ol503061c
CO130	10.1021/ol503707m
CO131	10.1021/ol702499h
CO132	10.1021/ol901978e
CO133	10.1021/ol9028308
CO134	10.1021/ol9029534
CO135	10.1021/acs.organomet.5b00874
CO136	10.1016/j.tet.2013.04.096
CO137	10.1016/s0040-4020(98)00809-6
CO138	10.1016/0040-4039(96)01302-0
CO139	10.1016/0040-4039(96)01984-3
CO140	10.1016/j.tetlet.2006.01.145
CO141	10.1016/s0040-4039(00)94062-0
CO142	10.1016/s0040-4039(97)00178-0
CO143	10.1016/s0040-4039(99)00517-1
CO144	10.1039/D2CY01805E
CO145	10.1021/acs.orglett.9b00946
CO146	10.1021/acs.orglett.7b03713
CO147	10.1021/acs.orglett.6b03861
CO148	10.1021/jo026449n

## Sheet: Reactions (Yield >=40%)
Article ID	Table/Scheme	Entry	Electrophile SMILES	Nucleophile SMILES	Product SMILES	Ni Precatalyst	Precatalyst Loading (mol%)	Effective Ligand	Ligand SMILES	Effective Ligand Loading (mol%)	Additional Base	Solvent	Temperature (°C)	Time (h)	Yield
CO001	Figure 2(C)	N/A	CC(CC1=CC=C(C(OP(OCC)(OCC)=O)=C)C=C1)C	C=C[Mg]Br	CC(C)CC1=CC=C(C=C1)C(C=C)=C	dppe(Ni)(butadiene)	2.5	dppe	P(CCP(C1=CC=CC=C1)C2=CC=CC=C2)(C3=CC=CC=C3)C4=CC=CC=C4	2.5	N/A	THF	23	1	86
CO001	Figure 2(C)	N/A	CC(CC1=CC=C(C(OP(OCC)(OCC)=O)=C)C=C1)C	C=C[Mg]Br	CC(C)CC1=CC=C(C=C1)C(C=C)=C	dmpe(Ni)(butadiene)	2.5	dmpe	CP(CCP(C)C)C	2.5	N/A	THF	23	1	92
CO002	Table 4	1	CC1=CC=C(OS(=O)(F)=O)C=C1	OB(O)C1=CC=CC=C1	CC1=CC=C(C2=CC=CC=C2)C=C1	NiCl2(PCy3)2	5	PCy3	P(C1CCCCC1)(C2CCCCC2)C3CCCCC3	20	K3PO4	dioxane	80	15	59
CO002	Table 4	2	CC1=CC=C(OS(=O)(F)=O)C=C1	OB(O)C1=CC=CC=C1	CC1=CC=C(C2=CC=CC=C2)C=C1	NiCl2(PCy3)2	5	PCy3	P(C1CCCCC1)(C2CCCCC2)C3CCCCC3	10	K3PO4	dioxane	80	15	57
CO002	Table 4	4	CC1=CC=C(OS(=O)(F)=O)C=C1	OB(O)C1=CC=CC=C1	CC1=CC=C(C2=CC=CC=C2)C=C1	NiCl2(dppe)	5	dppe	P(CCP(C1=CC=CC=C1)C2=CC=CC=C2)(C3=CC=CC=C3)C4=CC=CC=C4	10	K3PO4	dioxane	80	15	54
CO002	Table 4	8	CC1=CC=C(OS(=O)(F)=O)C=C1	OB(O)C1=CC=CC=C1	CC1=CC=C(C2=CC=CC=C2)C=C1	Ni(COD)2	5	PCy3	P(C1CCCCC1)(C2CCCCC2)C3CCCCC3	10	K3PO4	dioxane	80	15	66
CO002	Table 4	9	CC1=CC=C(OS(=O)(F)=O)C=C1	OB(O)C1=CC=CC=C1	CC1=CC=C(C2=CC=CC=C2)C=C1	NiCl2(PCy3)2	5	PCy3	P(C1CCCCC1)(C2CCCCC2)C3CCCCC3	10	Na2CO3	dioxane	80	15	60
CO002	Table 4	12	CC1=CC=C(OS(=O)(F)=O)C=C1	OB(O)C1=CC=CC=C1	CC1=CC=C(C2=CC=CC=C2)C=C1	NiCl2(PCy3)2	3	PCy3	P(C1CCCCC1)(C2CCCCC2)C3CCCCC3	12	K3PO4	dioxane	80	15	91
CO002	Table 4	13	CC1=CC=C(OS(=O)(F)=O)C=C1	OB(O)C1=CC=CC=C1	CC1=CC=C(C2=CC=CC=C2)C=C1	Ni(COD)2	3	PCy3	P(C1CCCCC1)(C2CCCCC2)C3CCCCC3	6	K3PO4	dioxane	80	15	99
CO002	Table 4	15	CC1=CC=C(OS(=O)(F)=O)C=C1	OB(O)C1=CC=CC=C1	CC1=CC=C(C2=CC=CC=C2)C=C1	NiCl2(PCy3)2	1	PCy3	P(C1CCCCC1)(C2CCCCC2)C3CCCCC3	4	K3PO4	dioxane	80	15	96
CO002	Table 4	16	CC1=CC=C(OS(=O)(F)=O)C=C1	OB(O)C1=CC=CC=C1	CC1=CC=C(C2=CC=CC=C2)C=C1	Ni(COD)2	1	PCy3	P(C1CCCCC1)(C2CCCCC2)C3CCCCC3	2	K3PO4	dioxane	80	15	100
CO003	Table 1	5	CC(C)(C)C(OC1=CC2=CC=CC=C2C=C1)=O	COC(C=C1)=CC=C1CCCB2[C@@H]3CCC[C@@H]2CCC3	COC1=CC=C(CCCC2=CC(C=CC=C3)=C3C=C2)C=C1	Ni(COD)2	8	IPr	CC(C)C(C=CC=C1C(C)C)=C1N2[C]N(C3=C(C(C)C)C=CC=C3C(C)C)C=C2	16	Cs2CO3	iPr2O	100	12	90
CO003	Table 1	13	CC(C)(C)C(OC1=CC2=CC=CC=C2C=C1)=O	COC(C=C1)=CC=C1CCCB2[C@@H]3CCC[C@@H]2CCC3	COC1=CC=C(CCCC2=CC(C=CC=C3)=C3C=C2)C=C1	Ni(COD)2	8	IPr	CC(C)C(C=CC=C1C(C)C)=C1N2[C]N(C3=C(C(C)C)C=CC=C3C(C)C)C=C2	16	K3PO4	iPr2O	100	12	53
CO003	Table 1	15	CC(C)(C)C(OC1=CC2=CC=CC=C2C=C1)=O	COC(C=C1)=CC=C1CCCB2[C@@H]3CCC[C@@H]2CCC3	COC1=CC=C(CCCC2=CC(C=CC=C3)=C3C=C2)C=C1	Ni(COD)2	8	IPr	CC(C)C(C=CC=C1C(C)C)=C1N2[C]N(C3=C(C(C)C)C=CC=C3C(C)C)C=C2	16	Cs2CO3	iPr2O	110	12	98
CO003	Table 1	16	CC(C)(C)C(OC1=CC2=CC=CC=C2C=C1)=O	COC(C=C1)=CC=C1CCCB2[C@@H]3CCC[C@@H]2CCC3	COC1=CC=C(CCCC2=CC(C=CC=C3)=C3C=C2)C=C1	Ni(COD)2	5	IPr	CC(C)C(C=CC=C1C(C)C)=C1N2[C]N(C3=C(C(C)C)C=CC=C3C(C)C)C=C2	10	Cs2CO3	iPr2O	110	12	98
CO003	Table 2	1	CC1=CC=C(S(OC2=CC3=CC=CC=C3C=C2)(=O)=O)C=C1	COC(C=C1)=CC=C1CCCB2[C@@H]3CCC[C@@H]2CCC3	COC1=CC=C(CCCC2=CC(C=CC=C3)=C3C=C2)C=C1	Ni(COD)2	8	IPr	CC(C)C(C=CC=C1C(C)C)=C1N2[C]N(C3=C(C(C)C)C=CC=C3C(C)C)C=C2	16	Cs2CO3	iPr2O	110	12	98
CO003	Table 2	2	O=S(OC1=CC2=CC=CC=C2C=C1)(N(CC)CC)=O	COC(C=C1)=CC=C1CCCB2[C@@H]3CCC[C@@H]2CCC3	COC1=CC=C(CCCC2=CC(C=CC=C3)=C3C=C2)C=C1	Ni(COD)2	8	IPr	CC(C)C(C=CC=C1C(C)C)=C1N2[C]N(C3=C(C(C)C)C=CC=C3C(C)C)C=C2	16	Cs2CO3	iPr2O	110	12	92
CO003	Table 2	3	O=C(OC1=CC2=CC=CC=C2C=C1)N(CC)CC	COC(C=C1)=CC=C1CCCB2[C@@H]3CCC[C@@H]2CCC3	COC1=CC=C(CCCC2=CC(C=CC=C3)=C3C=C2)C=C1	Ni(COD)2	8	IPr	CC(C)C(C=CC=C1C(C)C)=C1N2[C]N(C3=C(C(C)C)C=CC=C3C(C)C)C=C2	16	Cs2CO3	iPr2O	110	12	75
CO003	Table 2	4	CC(OC(OC1=CC2=CC=CC=C2C=C1)=O)(C)C	COC(C=C1)=CC=C1CCCB2[C@@H]3CCC[C@@H]2CCC3	COC1=CC=C(CCCC2=CC(C=CC=C3)=C3C=C2)C=C1	Ni(COD)2	8	IPr	CC(C)C(C=CC=C1C(C)C)=C1N2[C]N(C3=C(C(C)C)C=CC=C3C(C)C)C=C2	16	Cs2CO3	iPr2O	100	12	93
CO003	Table S3	11	CC(OC(OC1=CC2=CC=CC=C2C=C1)=O)(C)C	COC(C=C1)=CC=C1CCCB2[C@@H]3CCC[C@@H]2CCC3	COC1=CC=C(CCCC2=CC(C=CC=C3)=C3C=C2)C=C1	Ni(COD)2	8	ICy	C1(N2[C]N(C=C2)C3CCCCC3)CCCCC1	16	Cs2CO3	iPr2O	110	12	40
CO003	Table S6	2	CS(OC1=CC2=CC=CC=C2C=C1)(=O)=O	COC(C=C1)=CC=C1CCCB2[C@@H]3CCC[C@@H]2CCC3	COC1=CC=C(CCCC2=CC(C=CC=C3)=C3C=C2)C=C1	Ni(COD)2	8	IPr	CC(C)C(C=CC=C1C(C)C)=C1N2[C]N(C3=C(C(C)C)C=CC=C3C(C)C)C=C2	16	Cs2CO3	iPr2O	110	12	89
CO004	Table 1	11	O=C(OC1=CC(C=CC=C2)=C2C=C1)C(C)(C)C	CCCCC[Zn]Br	CCCCCC1=CC2=CC=CC=C2C=C1	Ni(COD)2	5	dcype	P(CCP(C1CCCCC1)C2CCCCC2)(C3CCCCC3)C4CCCCC4	5	N/A	THF/iPr2O	70	18	99
CO004	Table 1	12	O=C(OC1=CC(C=CC=C2)=C2C=C1)C(C)(C)C	CCCCC[Zn]Br	CCCCCC1=CC2=CC=CC=C2C=C1	Ni(COD)2	5	dcype	P(CCP(C1CCCCC1)C2CCCCC2)(C3CCCCC3)C4CCCCC4	5	N/A	THF/iPr2O	60	18	73
CO004	Table 1	13	O=C(OC1=CC(C=CC=C2)=C2C=C1)C(C)(C)C	CCCCC[Zn]Br	CCCCCC1=CC2=CC=CC=C2C=C1	Ni(COD)2	5	dcype	P(CCP(C1CCCCC1)C2CCCCC2)(C3CCCCC3)C4CCCCC4	5	N/A	THF/iPr2O	70	18	83
CO004	Table 1	14	O=C(OC1=CC(C=CC=C2)=C2C=C1)C(C)(C)C	CCCCC[Zn]Br	CCCCCC1=CC2=CC=CC=C2C=C1	NiCl2	5	dcype	P(CCP(C1CCCCC1)C2CCCCC2)(C3CCCCC3)C4CCCCC4	5	N/A	THF/iPr2O	70	18	93
CO004	Table 1	15	O=C(OC1=CC(C=CC=C2)=C2C=C1)C(C)(C)C	CCCCC[Zn]Br	CCCCCC1=CC2=CC=CC=C2C=C1	NiCl2	5	dcype	P(CCP(C1CCCCC1)C2CCCCC2)(C3CCCCC3)C4CCCCC4	5	N/A	THF/iPr2O	70	18	87
CO005	Table 3	1	O=S(OC1=CC=CC=C1)(C(F)(F)F)=O	FC1=C(F)C=C(F)C(F)=C1	FC1=C(C(C2=CC=CC=C2)=C(C(F)=C1)F)F	Ni(COD)2	5	DPEPhos	C1(P(C2=CC=CC=C2)C3=CC=CC=C3)=C(OC4=C(P(C5=CC=CC=C5)C6=CC=CC=C6)C=CC=C4)C=CC=C1	6	iPrMgCl	THF	25	4	53
CO005	Table 3	4	O=S(OC1=CC=CC=C1)(C(F)(F)F)=O	FC1=C(F)C=C(F)C(F)=C1	FC1=C(C(C2=CC=CC=C2)=C(C(F)=C1)F)F	Ni(COD)2	5	L2	CC1=CC(C)=CC(P(C2=CC(C)=CC(C)=C2)C3=C(OC4=C(P(C5=CC(C)=CC(C)=C5)C6=CC(C)=CC(C)=C6)C=CC=C4)C=CC=C3)=C1	6	iPrMgCl	THF	25	4	61
CO005	Table 3	5	O=S(OC1=CC=CC=C1)(C(F)(F)F)=O	FC1=C(F)C=C(F)C(F)=C1	FC1=C(C(C2=CC=CC=C2)=C(C(F)=C1)F)F	Ni(COD)2	5	L3	CC(C1=CC(C(C)(C)C)=CC(P(C2=CC(C(C)(C)C)=CC(C(C)(C)C)=C2)C3=C(OC4=C(P(C5=CC(C(C)(C)C)=CC(C(C)(C)C)=C5)C6=CC(C(C)(C)C)=CC(C(C)(C)C)=C6)C=CC=C4)C=CC=C3)=C1)(C)C	6	iPrMgCl	THF	25	4	56
CO005	Table 3	7	O=S(OC1=CC=CC=C1)(C(F)(F)F)=O	FC1=C(F)C=C(F)C(F)=C1	FC1=C(C(C2=CC=CC=C2)=C(C(F)=C1)F)F	Ni(COD)2	5	L5	OCC1=CC(CO)=CC(P(C2=CC(CO)=CC(CO)=C2)C3=C(OC4=C(P(C5=CC(CO)=CC(CO)=C5)C6=CC(CO)=CC(CO)=C6)C=CC=C4)C=CC=C3)=C1	6	iPrMgCl	THF	25	4	61
CO005	Table 3	8	O=S(OC1=CC=CC=C1)(C(F)(F)F)=O	FC1=C(F)C=C(F)C(F)=C1	FC1=C(C(C2=CC=CC=C2)=C(C(F)=C1)F)F	Ni(COD)2	5	L6	CC1=C(OC)C(C)=CC(P(C2=CC(C)=C(OC)C(C)=C2)C3=C(OC4=C(P(C5=CC(C)=C(OC)C(C)=C5)C6=CC(C)=C(OC)C(C)=C6)C=CC=C4)C=CC=C3)=C1	6	iPrMgCl	THF	25	4	70
CO006	Table 1	5	C=C(OP(OCC)(OCC)=O)C1=CC=CC=C1	C=C[Mg]Br	CC(C)CC1=CC=C(C=C1)C(C=C)=C	NiCl2(dppe)	2.5	dppe	P(CCP(C1=CC=CC=C1)C2=CC=CC=C2)(C3=CC=CC=C3)C4=CC=CC=C4	2.5	N/A	THF	23	1	85
CO006	Table 1	7	C=C(OP(OCC)(OCC)=O)C1=CC=CC=C1	C=C[Mg]Br	CC(C)CC1=CC=C(C=C1)C(C=C)=C	NiCl2(dppp)	2.5	dppp	P(CCCP(C1=CC=CC=C1)C2=CC=CC=C2)(C3=CC=CC=C3)C4=CC=CC=C4	2.5	N/A	THF	23	1	82
CO006	Table 1	9	C=C(OP(OCC)(OCC)=O)C1=CC=CC=C1	C=C[Mg]Br	CC(C)CC1=CC=C(C=C1)C(C=C)=C	NiCl2(dppe)	2.5	dppe	P(CCP(C1=CC=CC=C1)C2=CC=CC=C2)(C3=CC=CC=C3)C4=CC=CC=C4	2.5	N/A	THF	23	1	99
CO006	Table 1	10	C=C(OP(OCC)(OCC)=O)C1=CC=CC=C1	C=C[Mg]Br	CC(C)CC1=CC=C(C=C1)C(C=C)=C	NiCl2(dppp)	2.5	dmpe	CP(CCP(C)C)C	2.5	N/A	THF	23	1	99
CO006	Table 1	11	C=C(OP(OCC)(OCC)=O)C1=CC=CC=C1	C=C[Mg]Br	CC(C)CC1=CC=C(C=C1)C(C=C)=C	NiCl2(dppe)	2.5	depe	CCP(CCP(CC)CC)CC	2.5	N/A	THF	23	1	99
CO006	Table S1	17	C=C(OP(OCC)(OCC)=O)C1=CC=CC=C1	C=C[Mg]Br	CC(C)CC1=CC=C(C=C1)C(C=C)=C	NiCl2(dppf)	2.5	dppf	C1=CC=C(C=C1)P([C-]2C=CC=C2)C3=CC=CC=C3.C1=CC=C(C=C1)P([C-]2C=CC=C2)C3=CC=CC=C3.[Fe+2]	2.5	N/A	THF	23	1	51
CO007	Table 1	N/A	COC1=CC2=CC=CC=C2C=C1	CN1C2=CC=CC=C2N=C1	CN1C2=CC=CC=C2N=C1C3=CC=C(C=CC=C4)C4=C3	Ni(COD)2	10	IPr	CC(C)C(C=CC=C1C(C)C)=C1N2[C]N(C3=C(C(C)C)C=CC=C3C(C)C)C=C2	10	o-tolylMgBr	m-xylene	90	16	92
CO007	Scheme 2	N/A	COC1=CC2=CC=CC=C2C=C1	CN1C2=CC=CC=C2N=C1	CN1C2=CC=CC=C2N=C1C3=CC=C(C=CC=C4)C4=C3	Ni(COD)2	10	P(o-tolyl)3	CC1=CC=CC=C1P(C2=CC=CC=C2C)C3=CC=CC=C3C	10	o-tolylMgBr	m-xylene	90	16	61
CO007	Scheme 2	N/A	COC1=CC2=CC=CC=C2C=C1	CN1C2=CC=CC=C2N=C1	CN1C2=CC=CC=C2N=C1C3=CC=C(C=CC=C4)C4=C3	Ni(COD)2	10	CDC	CN1C2=C(C=CC=C2)N(C(C)C)C1[C]C3N(C(C)C)C(C=CC=C4)=C4N3C	10	o-tolylMgBr	m-xylene	90	16	60
CO007	Scheme 2	N/A	COC1=CC2=CC=CC=C2C=C1	CN1C2=CC=CC=C2N=C1	CN1C2=CC=CC=C2N=C1C3=CC=C(C=CC=C4)C4=C3	Ni(COD)2	10	IMes	CC1=C(N2C=CN(C3=C(C)C=C(C)C=C3C)[C]2)C(C)=CC(C)=C1	10	o-tolylMgBr	m-xylene	90	16	50
CO008	Table 3	3	COC1=CC2=C(C=C1)CCCC2	CC1=CC=C([Mg]Br)C=C1	CC(C=C1)=CC=C1C(C=C2)=CC3=C2CCCC3	NiCl2[P(iBu)3]2	5	P(iBu)3	CC(CP(CC(C)C)CC(C)C)C	10	N/A	iPr2O	60	15	42
CO008	Table 3	4	COC1=CC2=C(C=C1)CCCC2	CC1=CC=C([Mg]Br)C=C1	CC(C=C1)=CC=C1C(C=C2)=CC3=C2CCCC3	NiCl2[P(iPr)3]2	5	P(iPr)3	CC(P(C(C)C)C(C)C)C	10	N/A	iPr2O	60	15	82
CO008	Table 3	5	COC1=CC2=C(C=C1)CCCC2	CC1=CC=C([Mg]Br)C=C1	CC(C=C1)=CC=C1C(C=C2)=CC3=C2CCCC3	NiCl2(PCy3)2	5	PCy3	P(C1CCCCC1)(C2CCCCC2)C3CCCCC3	10	N/A	iPr2O	60	15	93
CO008	Table 3	6	COC1=CC2=C(C=C1)CCCC2	CC1=CC=C([Mg]Br)C=C1	CC(C=C1)=CC=C1C(C=C2)=CC3=C2CCCC3	NiCl2(PPhCy2)2	5	PPhCy2	P(C1CCCCC1)(C2CCCCC2)C3=CC=CC=C3	10	N/A	iPr2O	60	15	92
CO008	Table 3	7	COC1=CC2=C(C=C1)CCCC2	CC1=CC=C([Mg]Br)C=C1	CC(C=C1)=CC=C1C(C=C2)=CC3=C2CCCC3	NiCl2(PPh2Cy)2	5	PPh2Cy	P(C1=CC=CC=C1)(C2CCCCC2)C3=CC=CC=C3	10	N/A	iPr2O	60	15	81
CO009	Table 1	4	COC1=CC2=CC=CC=C2C=C1	CC(CO1)(C)COB1C2=CC=CC=C2	C12=CC=CC=C1C=C(C3=CC=CC=C3)C=C2	Ni(COD)2	10	PCy3	P(C1CCCCC1)(C2CCCCC2)C3CCCCC3	20	NaOEt	dioxane	80	12	64
CO009	Table 1	5	COC1=CC2=CC=CC=C2C=C1	CC(CO1)(C)COB1C2=CC=CC=C2	C12=CC=CC=C1C=C(C3=CC=CC=C3)C=C2	Ni(COD)2	10	PCy3	P(C1CCCCC1)(C2CCCCC2)C3CCCCC3	20	CsF	dioxane	80	12	54
CO009	Table 1	6	COC1=CC2=CC=CC=C2C=C1	CC(CO1)(C)COB1C2=CC=CC=C2	C12=CC=CC=C1C=C(C3=CC=CC=C3)C=C2	Ni(COD)2	10	PCy3	P(C1CCCCC1)(C2CCCCC2)C3CCCCC3	40	CsF	dioxane	80	12	47
CO009	Table 1	7	COC1=CC2=CC=CC=C2C=C1	CC(CO1)(C)COB1C2=CC=CC=C2	C12=CC=CC=C1C=C(C3=CC=CC=C3)C=C2	Ni(COD)2	10	PCy3	P(C1CCCCC1)(C2CCCCC2)C3CCCCC3	40	CsF	toluene	80	12	89
CO009	Table 1	8	COC1=CC2=CC=CC=C2C=C1	CC(CO1)(C)COB1C2=CC=CC=C2	C12=CC=CC=C1C=C(C3=CC=CC=C3)C=C2	Ni(COD)2	10	PCy3	P(C1CCCCC1)(C2CCCCC2)C3CCCCC3	40	CsF	toluene	120	12	93
CO010	Table 1	2	O=C(C(C)C)OC1=CC2=CC=CC=C2C=C1	Cl[Zn]C1=CC=CC=C1	C12=CC=CC=C1C=C(C3=CC=CC=C3)C=C2	NiCl2(PCy3)2	5	PCy3	P(C1CCCCC1)(C2CCCCC2)C3CCCCC3	10	N/A	THF/DMA	70	2	73
CO010	Table 1	3	O=C(OC1=CC(C=CC=C2)=C2C=C1)C(C)(C)C	Cl[Zn]C1=CC=CC=C1	C12=CC=CC=C1C=C(C3=CC=CC=C3)C=C2	NiCl2(PCy3)2	5	PCy3	P(C1CCCCC1)(C2CCCCC2)C3CCCCC3	10	N/A	THF/DMA	70	2	84
CO010	Table 1	4	O=C(OC1=CC(C=CC=C2)=C2C=C1)C(C)(C)C	Cl[Zn]C1=CC=CC=C1	C12=CC=CC=C1C=C(C3=CC=CC=C3)C=C2	NiCl2	5	PCy3	P(C1CCCCC1)(C2CCCCC2)C3CCCCC3	10	N/A	THF/DMA	70	2	78
CO010	Table 1	7	O=C(OC1=CC(C=CC=C2)=C2C=C1)C(C)(C)C	Cl[Zn]C1=CC=CC=C1	C12=CC=CC=C1C=C(C3=CC=CC=C3)C=C2	NiCl2(PCy3)2	5	P(tBu)3	CC(P(C(C)(C)C)C(C)(C)C)(C)C	10	N/A	THF/DMA	70	2	47
CO010	Table 1	11	O=C(OC1=CC(C=CC=C2)=C2C=C1)C(C)(C)C	Cl[Zn]C1=CC=CC=C1	C12=CC=CC=C1C=C(C3=CC=CC=C3)C=C2	NiCl2(PCy3)2	5	PCy3	P(C1CCCCC1)(C2CCCCC2)C3CCCCC3	10	N/A	THF/DMF	70	2	85
CO010	Table 1	12	O=C(OC1=CC(C=CC=C2)=C2C=C1)C(C)(C)C	Cl[Zn]C1=CC=CC=C1	C12=CC=CC=C1C=C(C3=CC=CC=C3)C=C2	NiCl2(PCy3)2	5	PCy3	P(C1CCCCC1)(C2CCCCC2)C3CCCCC3	10	N/A	THF/NMP	70	2	82
CO010	Table 1	13	O=C(OC1=CC(C=CC=C2)=C2C=C1)C(C)(C)C	Cl[Zn]C1=CC=CC=C1	C12=CC=CC=C1C=C(C3=CC=CC=C3)C=C2	NiCl2(PCy3)2	5	PCy3	P(C1CCCCC1)(C2CCCCC2)C3CCCCC3	10	N/A	THF/DMA	50	2	89
CO010	Table 1	14	O=C(OC1=CC(C=CC=C2)=C2C=C1)C(C)(C)C	Cl[Zn]C1=CC=CC=C1	C12=CC=CC=C1C=C(C3=CC=CC=C3)C=C2	NiCl2(PCy3)2	5	PCy3	P(C1CCCCC1)(C2CCCCC2)C3CCCCC3	10	N/A	THF/DMA	30	2	71
CO010	Table 1	15	O=C(OC1=CC(C=CC=C2)=C2C=C1)C(C)(C)C	Cl[Zn]C1=CC=CC=C1	C12=CC=CC=C1C=C(C3=CC=CC=C3)C=C2	NiCl2(PCy3)2	1	PCy3	P(C1CCCCC1)(C2CCCCC2)C3CCCCC3	2	N/A	THF/DMA	70	2	70
CO010	Table 1	16	O=C(OC1=CC(C=CC=C2)=C2C=C1)C(C)(C)C	Cl[Zn]C1=CC=CC=C1	C12=CC=CC=C1C=C(C3=CC=CC=C3)C=C2	NiCl2(PCy3)2	5	PCy3	P(C1CCCCC1)(C2CCCCC2)C3CCCCC3	10	N/A	THF/DMA	70	2	84
CO011	Table S1	1	OC1=CC2=CC=CC=C2C=C1	Br[Mg]C1=CC=CC=C1	C12=CC=CC=C1C=C(C3=CC=CC=C3)C=C2	NiF2	5	PCy3	P(C1CCCCC1)(C2CCCCC2)C3CCCCC3	20	N/A	THF/iPr2O	120	24	99
CO011	Table S1	2	OC1=CC2=CC=CC=C2C=C1	Br[Mg]C1=CC=CC=C1	C12=CC=CC=C1C=C(C3=CC=CC=C3)C=C2	NiF2	5	PCy3	P(C1CCCCC1)(C2CCCCC2)C3CCCCC3	20	N/A	THF/iPr2O	120	24	77
CO011	Table S1	5	OC1=CC2=CC=CC=C2C=C1	Br[Mg]C1=CC=CC=C1	C12=CC=CC=C1C=C(C3=CC=CC=C3)C=C2	NiF2	5	PCy3	P(C1CCCCC1)(C2CCCCC2)C3CCCCC3	20	N/A	THF/iPr2O	120	24	52
CO011	Table S1	9	OC1=CC2=CC=CC=C2C=C1	Br[Mg]C1=CC=CC=C1	C12=CC=CC=C1C=C(C3=CC=CC=C3)C=C2	NiF2	5	PCy3	P(C1CCCCC1)(C2CCCCC2)C3CCCCC3	20	N/A	THF/iPr2O	120	24	55
CO011	Table S1	10	OC1=CC2=CC=CC=C2C=C1	Br[Mg]C1=CC=CC=C1	C12=CC=CC=C1C=C(C3=CC=CC=C3)C=C2	NiF2	5	PCy3	P(C1CCCCC1)(C2CCCCC2)C3CCCCC3	20	N/A	THF/iPr2O	120	24	60
CO011	Table S1	11	OC1=CC2=CC=CC=C2C=C1	Br[Mg]C1=CC=CC=C1	C12=CC=CC=C1C=C(C3=CC=CC=C3)C=C2	NiF2	10	PCy3	P(C1CCCCC1)(C2CCCCC2)C3CCCCC3	40	N/A	THF/iPr2O	120	24	100
CO011	Table S1	12	OC1=CC2=CC=CC=C2C=C1	Cl[Mg]C1=CC=CC=C1	C12=CC=CC=C1C=C(C3=CC=CC=C3)C=C2	NiF2	10	PCy3	P(C1CCCCC1)(C2CCCCC2)C3CCCCC3	40	N/A	THF/iPr2O	120	24	64
CO011	Table S1	13	OC1=CC2=CC=CC=C2C=C1	I[Mg]C1=CC=CC=C1	C12=CC=CC=C1C=C(C3=CC=CC=C3)C=C2	NiF2	10	PCy3	P(C1CCCCC1)(C2CCCCC2)C3CCCCC3	40	N/A	THF/iPr2O	120	24	87
CO012	Table 1	12	C12=CC=CC=C1C(O[P+](N3CCCC3)(N4CCCC4)N5CCCC5)=CC=C2	COC1=CC=C(B(O)O)C=C1	COC(C=C1)=CC=C1C2=CC=CC3=CC=CC=C32	NiCl2	5	dppp	P(CCCP(C1=CC=CC=C1)C2=CC=CC=C2)(C3=CC=CC=C3)C4=CC=CC=C4	10	K3PO4	dioxane	100	3	46
CO012	Table 1	14	C12=CC=CC=C1C(O[P+](N3CCCC3)(N4CCCC4)N5CCCC5)=CC=C2	COC1=CC=C(B(O)O)C=C1	COC(C=C1)=CC=C1C2=CC=CC3=CC=CC=C32	Ni(dppp)Cl2	5	dppp	P(CCCP(C1=CC=CC=C1)C2=CC=CC=C2)(C3=CC=CC=C3)C4=CC=CC=C4	5	K3PO4	dioxane	100	3	81
CO012	Table 1	18	C12=CC=CC=C1C(O[P+](N3CCCC3)(N4CCCC4)N5CCCC5)=CC=C2	COC1=CC=C(B(O)O)C=C1	COC(C=C1)=CC=C1C2=CC=CC3=CC=CC=C32	Ni(dppp)Cl2	2	dppp	P(CCCP(C1=CC=CC=C1)C2=CC=CC=C2)(C3=CC=CC=C3)C4=CC=CC=C4	2	K3PO4	dioxane	100	3	52
CO012	Table 1	19	C12=CC=CC=C1C(O[P+](N3CCCC3)(N4CCCC4)N5CCCC5)=CC=C2	COC1=CC=C(B(O)O)C=C1	COC(C=C1)=CC=C1C2=CC=CC3=CC=CC=C32	Ni(dppp)Cl2	3	dppp	P(CCCP(C1=CC=CC=C1)C2=CC=CC=C2)(C3=CC=CC=C3)C4=CC=CC=C4	3	K3PO4	dioxane	100	3	59
CO013	Table S2	1	OC1=CC2=CC=CC=C2C=C1	CCCCC1=CC=C(B2OB(C3=CC=C(CCCC)C=C3)OB(C4=CC=C(CCCC)C=C4)O2)C=C1	C12=CC=CC=C1C=C(C3=CC=CC=C3)C=C2	Ni(COD)2	10	PCy3	P(C1CCCCC1)(C2CCCCC2)C3CCCCC3	40	NaH	o-xylene/THF	110	24	82
CO013	Table S2	2	OC1=CC2=CC=CC=C2C=C1	CCCCC1=CC=C(B2OB(C3=CC=C(CCCC)C=C3)OB(C4=CC=C(CCCC)C=C4)O2)C=C1	C12=CC=CC=C1C=C(C3=CC=CC=C3)C=C2	Ni(COD)2	10	PCy3	P(C1CCCCC1)(C2CCCCC2)C3CCCCC3	40	NaOH	o-xylene/THF	110	24	77
CO013	Table S2	3	OC1=CC2=CC=CC=C2C=C1	CCCCC1=CC=C(B2OB(C3=CC=C(CCCC)C=C3)OB(C4=CC=C(CCCC)C=C4)O2)C=C1	C12=CC=CC=C1C=C(C3=CC=CC=C3)C=C2	Ni(COD)2	10	PCy3	P(C1CCCCC1)(C2CCCCC2)C3CCCCC3	40	NaOMe	o-xylene/THF	110	24	75
CO013	Table S2	4	OC1=CC2=CC=CC=C2C=C1	CCCCC1=CC=C(B2OB(C3=CC=C(CCCC)C=C3)OB(C4=CC=C(CCCC)C=C4)O2)C=C1	C12=CC=CC=C1C=C(C3=CC=CC=C3)C=C2	Ni(COD)2	10	PCy3	P(C1CCCCC1)(C2CCCCC2)C3CCCCC3	40	NaOEt	o-xylene/THF	110	24	75
CO013	Table S2	5	OC1=CC2=CC=CC=C2C=C1	CCCCC1=CC=C(B2OB(C3=CC=C(CCCC)C=C3)OB(C4=CC=C(CCCC)C=C4)O2)C=C1	C12=CC=CC=C1C=C(C3=CC=CC=C3)C=C2	Ni(COD)2	10	PCy3	P(C1CCCCC1)(C2CCCCC2)C3CCCCC3	40	NaOtBu	o-xylene/THF	110	24	76
CO013	Table S2	6	OC1=CC2=CC=CC=C2C=C1	CCCCC1=CC=C(B2OB(C3=CC=C(CCCC)C=C3)OB(C4=CC=C(CCCC)C=C4)O2)C=C1	C12=CC=CC=C1C=C(C3=CC=CC=C3)C=C2	Ni(COD)2	10	PCy3	P(C1CCCCC1)(C2CCCCC2)C3CCCCC3	40	Na2CO3	o-xylene/THF	110	24	76
CO013	Table S2	7	OC1=CC2=CC=CC=C2C=C1	CCCCC1=CC=C(B2OB(C3=CC=C(CCCC)C=C3)OB(C4=CC=C(CCCC)C=C4)O2)C=C1	C12=CC=CC=C1C=C(C3=CC=CC=C3)C=C2	Ni(COD)2	10	PCy3	P(C1CCCCC1)(C2CCCCC2)C3CCCCC3	40	Na3PO4	o-xylene/THF	110	24	74
CO013	Table S4	2	OC1=CC2=CC=CC=C2C=C1	OB(O)C1=CC=CC=C1	C12=CC=CC=C1C=C(C3=CC=CC=C3)C=C2	Ni(COD)2	10	PCy3	P(C1CCCCC1)(C2CCCCC2)C3CCCCC3	40	NaH	o-xylene/THF	110	24	72
CO013	Table S4	7	OC1=CC2=CC=CC=C2C=C1	B1(OC(C=CC=C2)=C2O1)C3=CC=CC=C3	C12=CC=CC=C1C=C(C3=CC=CC=C3)C=C2	Ni(COD)2	10	PCy3	P(C1CCCCC1)(C2CCCCC2)C3CCCCC3	40	NaH	o-xylene/THF	110	24	74
CO014	Table 1	1	COC(C1=CC=CC=C1)C2=CC3=CC=CC=C3C=C2	COC1=CC=C([Mg]Br)C=C1	O(C1=CC=C(C=C1)C(C=2C=CC=CC2)C=3C=CC=4C=CC=CC4C3)C	Ni(COD)2	10	DPEPhos	C1(P(C2=CC=CC=C2)C3=CC=CC=C3)=C(OC4=C(P(C5=CC=CC=C5)C6=CC=CC=C6)C=CC=C4)C=CC=C1	20	N/A	toluene	25	48	56
CO014	Table 1	6	CN(CCOC(C1=CC=CC=C1)C2=CC3=CC=CC=C3C=C2)C	COC1=CC=C([Mg]Br)C=C1	O(C1=CC=C(C=C1)C(C=2C=CC=CC2)C=3C=CC=4C=CC=CC4C3)C	Ni(COD)2	10	DPEPhos	C1(P(C2=CC=CC=C2)C3=CC=CC=C3)=C(OC4=C(P(C5=CC=CC=C5)C6=CC=CC=C6)C=CC=C4)C=CC=C1	20	N/A	toluene	25	48	67
CO014	Table 1	7	COCCOC(C1=CC=CC=C1)C2=CC3=CC=CC=C3C=C2	COC1=CC=C([Mg]Br)C=C1	O(C1=CC=C(C=C1)C(C=2C=CC=CC2)C=3C=CC=4C=CC=CC4C3)C	Ni(COD)2	10	DPEPhos	C1(P(C2=CC=CC=C2)C3=CC=CC=C3)=C(OC4=C(P(C5=CC=CC=C5)C6=CC=CC=C6)C=CC=C4)C=CC=C1	20	N/A	toluene	25	48	69
CO014	Table 1	8	COCCOC(C1=CC=CC=C1)C2=CC3=CC=CC=C3C=C2	COC1=CC=C([Mg]Br)C=C1	O(C1=CC=C(C=C1)C(C=2C=CC=CC2)C=3C=CC=4C=CC=CC4C3)C	Ni(COD)2	5	dppb	P(CCCCP(C1=CC=CC=C1)C2=CC=CC=C2)(C3=CC=CC=C3)C4=CC=CC=C4	10	N/A	toluene	25	48	67
CO014	Table 1	9	COCCOC(C1=CC=CC=C1)C2=CC3=CC=CC=C3C=C2	COC1=CC=C([Mg]Br)C=C1	O(C1=CC=C(C=C1)C(C=2C=CC=CC2)C=3C=CC=4C=CC=CC4C3)C	Ni(acac)2	10	dpppent	P(CCCCCP(C1=CC=CC=C1)C2=CC=CC=C2)(C3=CC=CC=C3)C4=CC=CC=C4	20	N/A	toluene	25	48	74
CO014	Table 1	10	COCCOC(C1=CC=CC=C1)C2=CC3=CC=CC=C3C=C2	COC1=CC=C([Mg]Br)C=C1	O(C1=CC=C(C=C1)C(C=2C=CC=CC2)C=3C=CC=4C=CC=CC4C3)C	Ni(acac)2	10	dpph	P(CCCCCCP(C1=CC=CC=C1)C2=CC=CC=C2)(C3=CC=CC=C3)C4=CC=CC=C4	20	N/A	toluene	25	48	95
CO014	Table 1	11	COCCOC(C1=CC=CC=C1)C2=CC3=CC=CC=C3C=C2	COC1=CC=C([Mg]Br)C=C1	O(C1=CC=C(C=C1)C(C=2C=CC=CC2)C=3C=CC=4C=CC=CC4C3)C	Ni(acac)2	10	dppo	P(CCCCCCCCP(C1=CC=CC=C1)C2=CC=CC=C2)(C3=CC=CC=C3)C4=CC=CC=C4	20	N/A	toluene	25	48	84
CO014	Table 1	13	COCCOC(C1=CC=CC=C1)C2=CC3=CC=CC=C3C=C2	COC1=CC=C([Mg]Br)C=C1	O(C1=CC=C(C=C1)C(C=2C=CC=CC2)C=3C=CC=4C=CC=CC4C3)C	Ni(acac)2	10	PPh3	P(C1=CC=CC=C1)(C2=CC=CC=C2)C3=CC=CC=C3	20	N/A	toluene	25	48	90
CO015	Table 1	1	O=S(OC1=CC=CC=C1)(C(F)(F)F)=O	C=CCCCCCC	C=C(C=1C=CC=CC1)CCCCCC	Ni(COD)2	15	PCy2Ph	P(C1CCCCC1)(C2CCCCC2)C3=CC=CC=C3	18	NEt3	toluene	60	24	47
CO015	Table 1	3	O=S(OC1=CC=CC=C1)(C(F)(F)F)=O	C=CCCCCCC	C=C(C=1C=CC=CC1)CCCCCC	Ni(COD)2	15	dippf	[H][C-]1C=CC(P(C(C)C)C(C)C)=C1.[H][C-]1C=CC(P(C(C)C)C(C)C)=C1.[Fe+2]	18	NEt3	toluene	60	24	41
CO015	Table 1	4	O=S(OC1=CC=CC=C1)(C(F)(F)F)=O	C=CCCCCCC	C=C(C=1C=CC=CC1)CCCCCC	Ni(COD)2	15	diop	CC1(C)O[C@@](CP(C2=CC=CC=C2)C3=CC=CC=C3)([H])[C@](CP(C4=CC=CC=C4)C5=CC=CC=C5)([H])O1	18	NEt3	toluene	60	24	70
CO015	Table 1	5	O=S(OC1=CC=CC=C1)(C(F)(F)F)=O	C=CCCCCCC	C=C(C=1C=CC=CC1)CCCCCC	Ni(COD)2	15	dppb	P(CCCCP(C1=CC=CC=C1)C2=CC=CC=C2)(C3=CC=CC=C3)C4=CC=CC=C4	18	NEt3	toluene	60	24	48
CO015	Table 1	6	O=S(OC1=CC=CC=C1)(C(F)(F)F)=O	C=CCCCCCC	C=C(C=1C=CC=CC1)CCCCCC	Ni(COD)2	15	dcypb	P(CCCCP(C1CCCCC1)C2CCCCC2)(C3CCCCC3)C4CCCCC4	18	NEt3	toluene	60	24	67
CO015	Table 1	7	O=S(OC1=CC=CC=C1)(C(F)(F)F)=O	C=CCCCCCC	C=C(C=1C=CC=CC1)CCCCCC	Ni(COD)2	15	L1	P(C1CCCC1)(C2CCCC2)CCCCP(C3CCCC3)C4CCCC4	18	NEt3	toluene	60	24	86
CO015	Table 1	8	O=S(OC1=CC=CC=C1)(C(F)(F)F)=O	C=CCCCCCC	C=C(C=1C=CC=CC1)CCCCCC	Ni(COD)2	10	L1	P(C1CCCC1)(C2CCCC2)CCCCP(C3CCCC3)C4CCCC4	12	DABCO	toluene	60	24	99
CO015	Table 1	9	O=S(OC1=CC=CC=C1)(C(F)(F)F)=O	C=CCCCCCC	C=C(C=1C=CC=CC1)CCCCCC	Ni(COD)2	15	L1	P(C1CCCC1)(C2CCCC2)CCCCP(C3CCCC3)C4CCCC4	18	DABCO	toluene	60	24	92
CO015	Table S1	2	O=S(OC1=CC=CC=C1)(C(F)(F)F)=O	C=CCCCCCC	C=C(C=1C=CC=CC1)CCCCCC	Ni(COD)2	15	L1	P(C1CCCC1)(C2CCCC2)CCCCP(C3CCCC3)C4CCCC4	18	NMeCy2	toluene	60	24	75
CO015	Table S1	4	O=S(OC1=CC=CC=C1)(C(F)(F)F)=O	C=CCCCCCC	C=C(C=1C=CC=CC1)CCCCCC	Ni(COD)2	15	L1	P(C1CCCC1)(C2CCCC2)CCCCP(C3CCCC3)C4CCCC4	18	NHEt2	toluene	60	24	67
CO015	Table S1	6	O=S(OC1=CC=CC=C1)(C(F)(F)F)=O	C=CCCCCCC	C=C(C=1C=CC=CC1)CCCCCC	Ni(COD)2	15	L1	P(C1CCCC1)(C2CCCC2)CCCCP(C3CCCC3)C4CCCC4	18	Quinuclidine	toluene	60	24	100
CO015	Table S4	3	CS(OC1=CC=CC=C1)(=O)=O	C=CCCCCCC	C=C(C=1C=CC=CC1)CCCCCC	Ni(COD)2	15	L1	P(C1CCCC1)(C2CCCC2)CCCCP(C3CCCC3)C4CCCC4	18	DABCO	toluene	60	24	81
CO015	Table S4	5	CC1=CC=C(S(OC2=CC=CC=C2)(=O)=O)C=C1	C=CCCCCCC	C=C(C=1C=CC=CC1)CCCCCC	Ni(COD)2	15	L1	P(C1CCCC1)(C2CCCC2)CCCCP(C3CCCC3)C4CCCC4	18	DABCO	toluene	60	24	75
CO015	Table S4	7	O=S(OC1=CC=CC=C1)(N(C)C)=O	C=CCCCCCC	C=C(C=1C=CC=CC1)CCCCCC	Ni(COD)2	15	L1	P(C1CCCC1)(C2CCCC2)CCCCP(C3CCCC3)C4CCCC4	18	DABCO	toluene	60	24	65
CO016	Table 1	7	CCC(OC)C1=CC2=CC=CC=C2C=C1	CCCCC[Mg]I	CC[C@H](CCCCC)C1=CC2=CC=CC=C2C=C1	Ni(acac)2	10	dppe	P(CCP(C1=CC=CC=C1)C2=CC=CC=C2)(C3=CC=CC=C3)C4=CC=CC=C4	10	N/A	toluene	25	24	69
CO016	Table 1	8	CCC(OC)C1=CC2=CC=CC=C2C=C1	CCCCC[Mg]I	CC[C@H](CCCCC)C1=CC2=CC=CC=C2C=C2	Ni(acac)2	10	dppe	P(CCP(C1=CC=CC=C1)C2=CC=CC=C2)(C3=CC=CC=C3)C4=CC=CC=C4	15	N/A	toluene	25	24	95
CO016	Table 1	9	CCC(OC)C1=CC2=CC=CC=C2C=C1	CCCCC[Mg]I	CC[C@H](CCCCC)C1=CC2=CC=CC=C2C=C3	Ni(acac)2	10	dppe	P(CCP(C1=CC=CC=C1)C2=CC=CC=C2)(C3=CC=CC=C3)C4=CC=CC=C4	20	N/A	toluene	25	24	90
CO016	Table 1	12	CCC(OC)C1=CC2=CC=CC=C2C=C1	CCCCC[Mg]I	CC[C@H](CCCCC)C1=CC2=CC=CC=C2C=C4	Ni(dppe)Cl2	10	dppe	P(CCP(C1=CC=CC=C1)C2=CC=CC=C2)(C3=CC=CC=C3)C4=CC=CC=C4	20	N/A	toluene	25	24	89
CO016	Table 1	13	CCC(OC)C1=CC2=CC=CC=C2C=C1	CCCCC[Mg]Cl	CC[C@H](CCCCC)C1=CC2=CC=CC=C2C=C5	Ni(dppe)Cl2	10	dppe	P(CCP(C1=CC=CC=C1)C2=CC=CC=C2)(C3=CC=CC=C3)C4=CC=CC=C4	20	N/A	toluene	25	24	96
CO016	Table 1	14	CCC(OC)C1=CC2=CC=CC=C2C=C1	CCCCC[Mg]Br	CC[C@H](CCCCC)C1=CC2=CC=CC=C2C=C6	Ni(dppe)Cl2	10	dppe	P(CCP(C1=CC=CC=C1)C2=CC=CC=C2)(C3=CC=CC=C3)C4=CC=CC=C4	20	N/A	toluene	25	24	95
CO016	Table 1	15	CCC(OC)C1=CC2=CC=CC=C2C=C1	CCCCC[Mg]Br	CC[C@H](CCCCC)C1=CC2=CC=CC=C2C=C7	Ni(dppe)Cl2	5	dppe	P(CCP(C1=CC=CC=C1)C2=CC=CC=C2)(C3=CC=CC=C3)C4=CC=CC=C4	10	N/A	toluene	25	24	85
CO016	Table 1	16	CCC(OC)C1=CC2=CC=CC=C2C=C1	CCCCC[Mg]Br	CC[C@H](CCCCC)C1=CC2=CC=CC=C2C=C8	Ni(dppe)Cl2	2	dppe	P(CCP(C1=CC=CC=C1)C2=CC=CC=C2)(C3=CC=CC=C3)C4=CC=CC=C4	4	N/A	toluene	25	24	97
CO017	Table 1	2	O=C(OC1=CC(C=CC=C2)=C2C=C1)C(C)(C)C	O=C(CC1=CC=CC=C1)C2=CC=CC=C2	O=C(C(C1=CC(C=CC=C2)=C2C=C1)C3=CC=CC=C3)C4=CC=CC=C4	Ni(L1)(CO)2	10	L1	P(C1CCC1)(C2CCC2)CCP(C3CCC3)C4CCC4	10	K3PO4	toluene	150	24	61
CO017	Table 1	5	O=C(OC1=CC(C=CC=C2)=C2C=C1)C(C)(C)C	O=C(CC1=CC=CC=C1)C2=CC=CC=C2	O=C(C(C1=CC(C=CC=C2)=C2C=C1)C3=CC=CC=C3)C4=CC=CC=C5	Ni(dcypbz)(CO)2	10	dcypbz	C1(P(C2CCCCC2)C3CCCCC3)=C(C=CC=C1)P(C4CCCCC4)C5CCCCC5	10	K3PO4	toluene	150	24	46
CO017	Table 1	6	O=C(OC1=CC(C=CC=C2)=C2C=C1)C(C)(C)C	O=C(CC1=CC=CC=C1)C2=CC=CC=C2	O=C(C(C1=CC(C=CC=C2)=C2C=C1)C3=CC=CC=C3)C4=CC=CC=C6	Ni(dcypt)(CO)2	10	dcypt	C1(P(C2CCCCC2)C3CCCCC3)=CSC=C1P(C4CCCCC4)C5CCCCC5	10	K3PO4	toluene	150	24	79
CO017	Table 1	7	O=C(OC1=CC(C=CC=C2)=C2C=C1)C(C)(C)C	O=C(CC1=CC=CC=C1)C2=CC=CC=C2	O=C(C(C1=CC(C=CC=C2)=C2C=C1)C3=CC=CC=C3)C4=CC=CC=C7	Ni(COD)2	10	dcypt	C1(P(C2CCCCC2)C3CCCCC3)=CSC=C1P(C4CCCCC4)C5CCCCC5	10	K3PO4	toluene	150	24	98
CO017	Table 1	8	O=C(OC1=CC(C=CC=C2)=C2C=C1)C(C)(C)C	O=C(CC1=CC=CC=C1)C2=CC=CC=C2	O=C(C(C1=CC(C=CC=C2)=C2C=C1)C3=CC=CC=C3)C4=CC=CC=C8	Ni(COD)2	10	dcypt	C1(P(C2CCCCC2)C3CCCCC3)=CSC=C1P(C4CCCCC4)C5CCCCC5	10	K3PO4	toluene	150	24	92
CO017	Table 1	9	O=C(OC1=CC(C=CC=C2)=C2C=C1)C(C)(C)C	O=C(CC1=CC=CC=C1)C2=CC=CC=C2	O=C(C(C1=CC(C=CC=C2)=C2C=C1)C3=CC=CC=C3)C4=CC=CC=C9	Ni(COD)2	5	dcypt	C1(P(C2CCCCC2)C3CCCCC3)=CSC=C1P(C4CCCCC4)C5CCCCC5	5	K3PO4	toluene	150	24	95
CO017	Table 1	10	O=C(OC1=CC(C=CC=C2)=C2C=C1)C(C)(C)C	O=C(CC1=CC=CC=C1)C2=CC=CC=C2	O=C(C(C1=CC(C=CC=C2)=C2C=C1)C3=CC=CC=C3)C4=CC=CC=C10	Ni(COD)2	1	dcypt	C1(P(C2CCCCC2)C3CCCCC3)=CSC=C1P(C4CCCCC4)C5CCCCC5	1	K3PO4	toluene	150	24	59
CO017	Table 1	11	O=C(OC1=CC(C=CC=C2)=C2C=C1)C(C)(C)C	O=C(CC1=CC=CC=C1)C2=CC=CC=C2	O=C(C(C1=CC(C=CC=C2)=C2C=C1)C3=CC=CC=C3)C4=CC=CC=C11	Ni(COD)2	10	dcypt	C1(P(C2CCCCC2)C3CCCCC3)=CSC=C1P(C4CCCCC4)C5CCCCC5	10	K3PO4	toluene	100	96	92
CO017	Table 1	12	O=C(OC1=CC(C=CC=C2)=C2C=C1)C(C)(C)C	O=C(CC1=CC=CC=C1)C2=CC=CC=C2	O=C(C(C1=CC(C=CC=C2)=C2C=C1)C3=CC=CC=C3)C4=CC=CC=C12	Ni(PPh3)2Cl2	10	dcypt	C1(P(C2CCCCC2)C3CCCCC3)=CSC=C1P(C4CCCCC4)C5CCCCC5	10	K3PO4	toluene	150	24	66
CO018	Scheme 2	N/A	O=C(OC1=CC(C=CC=C2)=C2C=C1)C(C)(C)C	O=C1C(C)CC2=CC=CC=C21	O=C1[C@@](C2=CC=C(C=CC=C3)C3=C2)(C)CC4=CC=CC=C41	Ni(COD)2	10	BINAP	C1(C2=C3C=CC=CC3=CC=C2P(C4=CC=CC=C4)C5=CC=CC=C5)=C6C=CC=CC6=CC=C1P(C7=CC=CC=C7)C8=CC=CC=C8	10	NaOtBu	toluene	80	12	56
CO018	Scheme 2	N/A	O=C(OC1=CC(C=CC=C2)=C2C=C1)C(C)(C)C	O=C1C(C)CC2=CC=CC=C21	O=C1[C@@](C2=CC=C(C=CC=C3)C3=C2)(C)CC4=CC=CC=C42	Ni(COD)2	10	L2	CC(C=C1)=CC=C1P(C2=CC=C(C)C=C2)C3=CC=C4C=CC=CC4=C3C5=C6C=CC=CC6=CC=C5P(C7=CC=C(C)C=C7)C8=CC=C(C)C=C8	10	NaOtBu	toluene	80	12	88
CO018	Scheme 2	N/A	O=C(OC1=CC(C=CC=C2)=C2C=C1)C(C)(C)C	O=C1C(C)CC2=CC=CC=C21	O=C1[C@@](C2=CC=C(C=CC=C3)C3=C2)(C)CC4=CC=CC=C43	Ni(COD)2	10	L3	COC1=CC=CC(P(C2=CC=CC=C2)C3=CC=CC=C3)=C1C4=C(OC)C=CC=C4P(C5=CC=CC=C5)C6=CC=CC=C6	10	NaOtBu	toluene	80	12	71
CO018	Scheme 2	N/A	O=C(OC1=CC(C=CC=C2)=C2C=C1)C(C)(C)C	O=C1C(C)CC2=CC=CC=C21	O=C1[C@@](C2=CC=C(C=CC=C3)C3=C2)(C)CC4=CC=CC=C44	Ni(COD)2	10	L5	FC(O1)(F)OC2=C1C(C3=C(OC(F)(F)O4)C4=CC=C3P(C5=CC=CC=C5)C6=CC=CC=C6)=C(P(C7=CC=CC=C7)C8=CC=CC=C8)C=C2	10	NaOtBu	toluene	80	12	65
CO019	Table 1	1	C=CCOC(OC(C)(C)C)=O	C1(CC2=CC=CC=C2)=CC=CC=C1	C=CCC(C1=CC=CC=C1)C2=CC=CC=C2	Ni(COD)2	7.5	dppf	C1=CC=C(C=C1)P([C-]2C=CC=C2)C3=CC=CC=C3.C1=CC=C(C=C1)P([C-]2C=CC=C2)C3=CC=CC=C3.[Fe+2]	15	KHMDS	DME	24	12	88
CO019	Table 1	2	C=CCOC(OC(C)(C)C)=O	FC(C=C1)=CC=C1CC2=CC=CC=C2	C=CCC(C1=CC=C(F)C=C1)C2=CC=CC=C2	Ni(COD)2	7.5	dppf	C1=CC=C(C=C1)P([C-]2C=CC=C2)C3=CC=CC=C3.C1=CC=C(C=C1)P([C-]2C=CC=C2)C3=CC=CC=C3.[Fe+2]	15	KHMDS	DME	24	12	67
CO019	Table 1	3	C=CCOC(OC(C)(C)C)=O	ClC(C=C1)=CC=C1CC2=CC=CC=C2	C=CCC(C1=CC=C(Cl)C=C1)C2=CC=CC=C2	Ni(COD)2	7.5	dppf	C1=CC=C(C=C1)P([C-]2C=CC=C2)C3=CC=CC=C3.C1=CC=C(C=C1)P([C-]2C=CC=C2)C3=CC=CC=C3.[Fe+2]	15	NaHMDS	DME	24	12	98
CO019	Table 1	4	C=CCOC(OC(C)(C)C)=O	BrC(C=C1)=CC=C1CC2=CC=CC=C2	C=CCC(C1=CC=C(Br)C=C1)C2=CC=CC=C2	Ni(COD)2	7.5	dppf	C1=CC=C(C=C1)P([C-]2C=CC=C2)C3=CC=CC=C3.C1=CC=C(C=C1)P([C-]2C=CC=C2)C3=CC=CC=C3.[Fe+2]	15	NaHMDS	DME	24	12	89
CO019	Table 1	5	C=CCOC(OC(C)(C)C)=O	CC(C=C1)=CC=C1CC2=CC=CC=C2	C=CCC(C1=CC=C(C)C=C1)C2=CC=CC=C2	Ni(COD)2	7.5	dppf	C1=CC=C(C=C1)P([C-]2C=CC=C2)C3=CC=CC=C3.C1=CC=C(C=C1)P([C-]2C=CC=C2)C3=CC=CC=C3.[Fe+2]	15	KHMDS	DME	24	12	61
CO019	Table 1	6	C=CCOC(OC(C)(C)C)=O	CC1=CC=CC=C1CC2=CC=CC=C2	C=CCC(C1=CC=CC=C1C)C2=CC=CC=C2	Ni(COD)2	7.5	dppf	C1=CC=C(C=C1)P([C-]2C=CC=C2)C3=CC=CC=C3.C1=CC=C(C=C1)P([C-]2C=CC=C2)C3=CC=CC=C3.[Fe+2]	15	KHMDS	DME	24	12	65
CO019	Table 1	7	C=CCOC(OC(C)(C)C)=O	C12=CC=CC=C1CC3=C2C=CC=C3	C=CCC1C2=C(C=CC=C2)C3=CC=CC=C31	Ni(COD)2	7.5	dppf	C1=CC=C(C=C1)P([C-]2C=CC=C2)C3=CC=CC=C3.C1=CC=C(C=C1)P([C-]2C=CC=C2)C3=CC=CC=C3.[Fe+2]	15	LiOtBu	DME	24	12	83
CO020	Table 1	1	OC(C=C)C1=CC=CC=C1	O=C1C(C(OC)=O)CCC1	O=C1C(C(OC)=O)(C/C=C\C2=CC=CC=C2)CCC1	Ni(COD)2	1	L1	C1(C2=C3C=CC=CC3=CC=C2P(C4=CC=CC=C4)C5=CC=CC=C5)=C6C=CC=CC6=CC=C1P(C7=CC=CC=C7)C8=CC=CC=C8	2	N/A	Et2O	25	36	91
CO020	Table 1	2	OC(C=C)C1=CC=CC=C1	O=C1C(C(OC)=O)CCC1	O=C1C(C(OC)=O)(C/C=C\C2=CC=CC=C2)CCC2	Ni(COD)2	1	L2	CC(C=C1)=CC=C1P(C2=CC=C(C)C=C2)C3=CC=C4C=CC=CC4=C3C5=C6C=CC=CC6=CC=C5P(C7=CC=C(C)C=C7)C8=CC=C(C)C=C8	2	N/A	Et2O	25	36	90
CO020	Table 1	3	OC(C=C)C1=CC=CC=C1	O=C1C(C(OC)=O)CCC1	O=C1C(C(OC)=O)(C/C=C\C2=CC=CC=C2)CCC3	Ni(COD)2	1	L3	ClC(C=C1)=CC=C1P(C2=CC=C(Cl)C=C2)C3=CC=C4C=CC=CC4=C3C5=C6C=CC=CC6=CC=C5P(C7=CC=C(Cl)C=C7)C8=CC=C(Cl)C=C8	2	N/A	Et2O	25	36	60
CO020	Table 1	4	OC(C=C)C1=CC=CC=C1	O=C1C(C(OC)=O)CCC1	O=C1C(C(OC)=O)(C/C=C\C2=CC=CC=C2)CCC4	Ni(COD)2	1	L4	C1(C2=C3CCCCC3=CC=C2P(C4=CC=CC=C4)C5=CC=CC=C5)=C6CCCCC6=CC=C1P(C7=CC=CC=C7)C8=CC=CC=C8	2	N/A	Et2O	25	36	99
CO020	Table 1	5	OC(C=C)C1=CC=CC=C1	O=C1C(C(OC)=O)CCC1	O=C1C(C(OC)=O)(C/C=C\C2=CC=CC=C2)CCC5	Ni(COD)2	1	L5	FC(O1)(F)OC2=C1C(C3=C(OC(F)(F)O4)C4=CC=C3P(C5=CC=CC=C5)C6=CC=CC=C6)=C(P(C7=CC=CC=C7)C8=CC=CC=C8)C=C2	2	N/A	Et2O	25	36	40
CO020	Table 1	6	OC(C=C)C1=CC=CC=C1	O=C1C(C(OC)=O)CCC1	O=C1C(C(OC)=O)(C/C=C\C2=CC=CC=C2)CCC6	Ni(COD)2	1	L6	COC1=CC=CC(P(C2=CC=CC=C2)C3=CC=CC=C3)=C1C4=C(OC)C=CC=C4P(C5=CC=CC=C5)C6=CC=CC=C6	2	N/A	Et2O	25	36	69
CO020	Table 1	7	OC(C=C)C1=CC=CC=C1	O=C1C(C(OC)=O)CCC1	O=C1C(C(OC)=O)(C/C=C\C2=CC=CC=C2)CCC7	Ni(COD)2	1	L4	C1(C2=C3CCCCC3=CC=C2P(C4=CC=CC=C4)C5=CC=CC=C5)=C6CCCCC6=CC=C1P(C7=CC=CC=C7)C8=CC=CC=C8	2	N/A	Et2O	10	36	99
CO020	Table 1	8	OC(C=C)C1=CC=CC=C1	O=C1C(C(OC)=O)CCC1	O=C1C(C(OC)=O)(C/C=C\C2=CC=CC=C2)CCC8	Ni(COD)2	1	L4	C1(C2=C3CCCCC3=CC=C2P(C4=CC=CC=C4)C5=CC=CC=C5)=C6CCCCC6=CC=C1P(C7=CC=CC=C7)C8=CC=CC=C8	2	N/A	Et2O	0	36	80
CO020	Table 1	9	OC(C=C)C1=CC=CC=C1	O=C1C(C(OC)=O)CCC1	O=C1C(C(OC)=O)(C/C=C\C2=CC=CC=C2)CCC9	Ni(COD)2	2	L4	C1(C2=C3CCCCC3=CC=C2P(C4=CC=CC=C4)C5=CC=CC=C5)=C6CCCCC6=CC=C1P(C7=CC=CC=C7)C8=CC=CC=C8	4	N/A	Et2O	0	48	99
CO020	Table 1	10	OC(C=C)C1=CC=CC=C1	O=C1C(C(OC)=O)CCC1	O=C1C(C(OC)=O)(C/C=C\C2=CC=CC=C2)CCC10	Ni(COD)2	1	L4	C1(C2=C3CCCCC3=CC=C2P(C4=CC=CC=C4)C5=CC=CC=C5)=C6CCCCC6=CC=C1P(C7=CC=CC=C7)C8=CC=CC=C8	2	N/A	Et2O	-10	36	64
CO020	Table 1	11	OC(C=C)C1=CC=CC=C1	O=C1C(C(OC)=O)CCC1	O=C1C(C(OC)=O)(C/C=C\C2=CC=CC=C2)CCC11	Ni(COD)2	1	L4	C1(C2=C3CCCCC3=CC=C2P(C4=CC=CC=C4)C5=CC=CC=C5)=C6CCCCC6=CC=C1P(C7=CC=CC=C7)C8=CC=CC=C8	2	N/A	THF	25	36	50
CO020	Table 1	16	OC(C=C)C1=CC=CC=C1	O=C1C(C(OC)=O)CCC1	O=C1C(C(OC)=O)(C/C=C\C2=CC=CC=C2)CCC12	Ni(COD)2	1	L4	C1(C2=C3CCCCC3=CC=C2P(C4=CC=CC=C4)C5=CC=CC=C5)=C6CCCCC6=CC=C1P(C7=CC=CC=C7)C8=CC=CC=C8	2	N/A	CH3CN	25	36	99
CO021	Table 1	9	COC1=CC2=CC=CC=C2C=C1	COC(C=C1)=CC=C1CCCB2[C@@H]3CCC[C@@H]2CCC3	COC(C=C1)=CC=C1CCCC2=CC3=CC=CC=C3C=C2	Ni(COD)2	10	PCy3	P(C1CCCCC1)(C2CCCCC2)C3CCCCC3	20	CsF	iPr2O	130	36	53
CO021	Table 1	10	COC1=CC2=CC=CC=C2C=C1	COC(C=C1)=CC=C1CCCB2[C@@H]3CCC[C@@H]2CCC3	COC(C=C1)=CC=C1CCCC2=CC3=CC=CC=C3C=C3	Ni(COD)2	10	PCy3	P(C1CCCCC1)(C2CCCCC2)C3CCCCC3	20	CsF	iPr2O	130	60	61
CO021	Table 1	11	COC1=CC2=CC=CC=C2C=C1	COC(C=C1)=CC=C1CCCB2[C@@H]3CCC[C@@H]2CCC3	COC(C=C1)=CC=C1CCCC2=CC3=CC=CC=C3C=C4	Ni(COD)2	10	PCy3	P(C1CCCCC1)(C2CCCCC2)C3CCCCC3	20	CsF	iPr2O	130	84	56
CO021	Table 1	12	COC1=CC2=CC=CC=C2C=C1	COC(C=C1)=CC=C1CCCB2[C@@H]3CCC[C@@H]2CCC3	COC(C=C1)=CC=C1CCCC2=CC3=CC=CC=C3C=C5	Ni(COD)2	10	PCy3	P(C1CCCCC1)(C2CCCCC2)C3CCCCC3	40	CsF	iPr2O	130	60	91
CO021	Table 1	13	COC1=CC2=CC=CC=C2C=C1	COC(C=C1)=CC=C1CCCB2[C@@H]3CCC[C@@H]2CCC3	COC(C=C1)=CC=C1CCCC2=CC3=CC=CC=C3C=C6	Ni(COD)2	10	PCy3	P(C1CCCCC1)(C2CCCCC2)C3CCCCC3	40	CsF	iPr2O	110	60	93
CO021	Table S9	2	CO/C=C/C1=CC2=CC=CC=C2C=C1	COC(C=C1)=CC=C1CCCB2[C@@H]3CCC[C@@H]2CCC3	COC(C=C1)=CC=C1CCCC2=CC3=CC=CC=C3C=C7	NiCl2(PCy3)2	5	PCy3	P(C1CCCCC1)(C2CCCCC2)C3CCCCC3	10	Cs2CO3	iPr2O	100	18	92
CO021	Table S9	5	CO/C=C/C1=CC2=CC=CC=C2C=C1	COC(C=C1)=CC=C1CCCB2[C@@H]3CCC[C@@H]2CCC3	COC(C=C1)=CC=C1CCCC2=CC3=CC=CC=C3C=C8	Ni(COD)2	5	PCy3	P(C1CCCCC1)(C2CCCCC2)C3CCCCC3	10	Cs2CO3	iPr2O	100	18	65
CO021	Table S9	6	CO/C=C/C1=CC2=CC=CC=C2C=C1	COC(C=C1)=CC=C1CCCB2[C@@H]3CCC[C@@H]2CCC3	COC(C=C1)=CC=C1CCCC2=CC3=CC=CC=C3C=C9	Ni(COD)2	5	PCy3	P(C1CCCCC1)(C2CCCCC2)C3CCCCC3	10	CsF	iPr2O	100	18	68
CO021	Table S9	7	CO/C=C/C1=CC2=CC=CC=C2C=C1	COC(C=C1)=CC=C1CCCB2[C@@H]3CCC[C@@H]2CCC3	COC(C=C1)=CC=C1CCCC2=CC3=CC=CC=C3C=C10	Ni(COD)2	5	PCy3	P(C1CCCCC1)(C2CCCCC2)C3CCCCC3	10	K2CO3	iPr2O	100	18	80
CO021	Table S9	8	CO/C=C/C1=CC2=CC=CC=C2C=C1	COC(C=C1)=CC=C1CCCB2[C@@H]3CCC[C@@H]2CCC3	COC(C=C1)=CC=C1CCCC2=CC3=CC=CC=C3C=C11	Ni(COD)2	5	PCy3	P(C1CCCCC1)(C2CCCCC2)C3CCCCC3	10	K3PO4	iPr2O	100	18	65
CO021	Table S9	10	CO/C=C/C1=CC2=CC=CC=C2C=C1	COC(C=C1)=CC=C1CCCB2[C@@H]3CCC[C@@H]2CCC3	COC(C=C1)=CC=C1CCCC2=CC3=CC=CC=C3C=C12	Ni(COD)2	5	PCy3	P(C1CCCCC1)(C2CCCCC2)C3CCCCC3	10	Cs2CO3	Et2O	100	18	85
CO021	Table S9	12	CO/C=C/C1=CC2=CC=CC=C2C=C1	COC(C=C1)=CC=C1CCCB2[C@@H]3CCC[C@@H]2CCC3	COC(C=C1)=CC=C1CCCC2=CC3=CC=CC=C3C=C13	Ni(COD)2	5	PCy3	P(C1CCCCC1)(C2CCCCC2)C3CCCCC3	10	Cs2CO3	toluene	100	18	78
CO021	Table S9	13	CO/C=C/C1=CC2=CC=CC=C2C=C1	COC(C=C1)=CC=C1CCCB2[C@@H]3CCC[C@@H]2CCC3	COC(C=C1)=CC=C1CCCC2=CC3=CC=CC=C3C=C14	Ni(COD)2	5	PCy3	P(C1CCCCC1)(C2CCCCC2)C3CCCCC4	10	Cs2CO3	iPr2O	100	18	100
CO022	Table 1	1	O=S(OC1=CC=CC=C1)(C(F)(F)F)=O	O=CC1=CC=CC=C1	O=C(C=1C=CC=CC1)C=2C=CC=CC2	Ni(COD)2	10	Triphos	CC(CP(C1=CC=CC=C1)C2=CC=CC=C2)(CP(C3=CC=CC=C3)C4=CC=CC=C4)CP(C5=CC=CC=C5)C6=CC=CC=C6	12	TMP	toluene	110	20	97
CO022	Table 1	8	O=S(OC1=CC=CC=C1)(C(F)(F)F)=O	O=CC1=CC=CC=C1	O=C(C=1C=CC=CC1)C=2C=CC=CC2	Ni(COD)2	10	Triphos	CC(CP(C1=CC=CC=C1)C2=CC=CC=C2)(CP(C3=CC=CC=C3)C4=CC=CC=C4)CP(C5=CC=CC=C5)C6=CC=CC=C6	12	NHEt2	toluene	110	20	87
CO022	Table S3	8	O=S(OC1=CC=CC=C1)(C(F)(F)F)=O	O=CC1=CC=CC=C1	O=C(C=1C=CC=CC1)C=2C=CC=CC2	Ni(COD)2	10	dppp	P(CCCP(C1=CC=CC=C1)C2=CC=CC=C2)(C3=CC=CC=C3)C4=CC=CC=C4	12	TMP	toluene	110	20	95
CO022	Table S3	17	O=S(OC1=CC=CC=C1)(C(F)(F)F)=O	O=CC1=CC=CC=C1	O=C(C=1C=CC=CC1)C=2C=CC=CC2	Ni(COD)2	10	(R,R)-BDPP	C[C@H](C[C@@H](C)P(C1=CC=CC=C1)C2=CC=CC=C2)P(C3=CC=CC=C3)C4=CC=CC=C4	12	TMP	toluene	110	20	47
CO023	Figure 1	1	CC(C1=CC=C(OS(C)(=O)=O)C=C1)(C)C	C1=CCCO1	CC(C1=CC=C([C@H]2CC=CO2)C=C1)(C)C	NiCl2[(R,R)-QuinoxP*]	5	(R,R)-QuinoxP*	CC(C)(C)[P@@](C)C1=NC2=CC=CC=C2N=C1[P@](C)C(C)(C)C	5	N/A	DMSO	100	48	85
CO023	Figure 1	2	CC(C1=CC=C(OS(=O)(C(F)(F)F)=O)C=C1)(C)C	C1=CCCO1	CC(C1=CC=C([C@H]2CC=CO2)C=C2)(C)C	NiCl2[(R,R)-QuinoxP*]	5	(R,R)-QuinoxP*	CC(C)(C)[P@@](C)C1=NC2=CC=CC=C2N=C1[P@](C)C(C)(C)C	5	N/A	DMSO	100	48	77
CO023	Figure 1	3	CC(C1=CC=C(OS(C2=CC=C(C)C=C2)(=O)=O)C=C1)(C)C	C1=CCCO1	CC(C1=CC=C([C@H]2CC=CO2)C=C3)(C)C	NiCl2[(R,R)-QuinoxP*]	5	(R,R)-QuinoxP*	CC(C)(C)[P@@](C)C1=NC2=CC=CC=C2N=C1[P@](C)C(C)(C)C	5	N/A	DMSO	100	48	70
CO024	Table 1	1	CN1C(C(OC)=O)=CC2=C1C=CC=C2	C1(CCCB2C3CCCC2CCC3)=CC=CC=C1	CN1C(C(CCC2=CC=CC=C2)=O)=CC3=C1C=CC=C3	Ni(COD)2	10	IPr-Cyp	C1(CCCC1)C2=C(N3[C]N(C=C3)C4=C(C=C(C5CCCC5)C=C4C6CCCC6)C7CCCC7)C(C8CCCC8)=CC(C9CCCC9)=C2	20	K3PO4	toluene	130	16	80
CO024	Table 1	5	CN1C(C(OC)=O)=CC2=C1C=CC=C2	C1(CCCB2C3CCCC2CCC3)=CC=CC=C1	CN1C(C(CCC2=CC=CC=C2)=O)=CC3=C1C=CC=C4	Ni(COD)2	10	IPr	CC(C)C(C=CC=C1C(C)C)=C1N2[C]N(C3=C(C(C)C)C=CC=C3C(C)C)C=C2	20	K3PO4	toluene	130	16	50
CO024	Table 1	6	CN1C(C(OC)=O)=CC2=C1C=CC=C2	C1(CCCB2C3CCCC2CCC3)=CC=CC=C1	CN1C(C(CCC2=CC=CC=C2)=O)=CC3=C1C=CC=C5	Ni(COD)2	10	SIPr	CC(C1=C(N2CCN(C3=C(C(C)C)C=CC=C3C(C)C)[C]2)C(C(C)C)=CC=C1)C	20	K3PO4	toluene	130	16	45
CO024	Table 1	7	CN1C(C(OC)=O)=CC2=C1C=CC=C2	C1(CCCB2C3CCCC2CCC3)=CC=CC=C1	CN1C(C(CCC2=CC=CC=C2)=O)=CC3=C1C=CC=C6	Ni(COD)2	10	IPr-CHPh2	CC(C1=C(N2C=CN(C3=C(C(C)C)C=C(C=C3C(C)C)C(C4=CC=CC=C4)C5=CC=CC=C5)[C]2)C(C(C)C)=CC(C(C6=CC=CC=C6)C7=CC=CC=C7)=C1)C	20	K3PO4	toluene	130	16	58
CO024	Table 1	8	CN1C(C(OC)=O)=CC2=C1C=CC=C2	C1(CCCB2C3CCCC2CCC3)=CC=CC=C1	CN1C(C(CCC2=CC=CC=C2)=O)=CC3=C1C=CC=C7	Ni(COD)2	10	IPr-CPh3	CC(C)C1=C(C(C(C)C)=CC(C(C2=CC=CC=C2)(C3=CC=CC=C3)C4=CC=CC=C4)=C1)N5C=CN([C]5)C6=C(C=C(C(C7=CC=CC=C7)(C8=CC=CC=C8)C9=CC=CC=C9)C=C6C(C)C)C(C)C	20	K3PO4	toluene	130	16	54
CO024	Table 1	9	CN1C(C(OC)=O)=CC2=C1C=CC=C2	C1(CCCB2C3CCCC2CCC3)=CC=CC=C1	CN1C(C(CCC2=CC=CC=C2)=O)=CC3=C1C=CC=C8	Ni(COD)2	10	IPr-CH(CH3)2	CC(C1=C(N2[C]N(C=C2)C3=C(C=C(C(C)C)C=C3C(C)C)C(C)C)C(C(C)C)=CC(C(C)C)=C1)C	20	K3PO4	toluene	130	16	60
CO024	Table 1	10	CN1C(C(OC)=O)=CC2=C1C=CC=C2	C1(CCCB2C3CCCC2CCC3)=CC=CC=C1	CN1C(C(CCC2=CC=CC=C2)=O)=CC3=C1C=CC=C9	Ni(COD)2	10	IPr-Cyp	C1(CCCC1)C2=C(N3[C]N(C=C3)C4=C(C=C(C5CCCC5)C=C4C6CCCC6)C7CCCC7)C(C8CCCC8)=CC(C9CCCC9)=C2	20	KF	toluene	130	16	58
CO024	Table 1	11	CN1C(C(OC)=O)=CC2=C1C=CC=C2	C1(CCCB2C3CCCC2CCC3)=CC=CC=C1	CN1C(C(CCC2=CC=CC=C2)=O)=CC3=C1C=CC=C10	Ni(COD)2	10	IPr-Cyp	C1(CCCC1)C2=C(N3[C]N(C=C3)C4=C(C=C(C5CCCC5)C=C4C6CCCC6)C7CCCC7)C(C8CCCC8)=CC(C9CCCC9)=C2	20	K2CO3	toluene	130	16	50
CO024	Table 1	12	CN1C(C(OC)=O)=CC2=C1C=CC=C2	C1(CCCB2C3CCCC2CCC3)=CC=CC=C1	CN1C(C(CCC2=CC=CC=C2)=O)=CC3=C1C=CC=C11	Ni(COD)2	10	IPr-Cyp	C1(CCCC1)C2=C(N3[C]N(C=C3)C4=C(C=C(C5CCCC5)C=C4C6CCCC6)C7CCCC7)C(C8CCCC8)=CC(C9CCCC9)=C2	20	N/A	toluene	130	16	51
CO024	Table 1	13	CN1C(C(OC)=O)=CC2=C1C=CC=C2	C1(CCCB2C3CCCC2CCC3)=CC=CC=C1	CN1C(C(CCC2=CC=CC=C2)=O)=CC3=C1C=CC=C12	Ni(COD)2	10	IPr-Cyp	C1(CCCC1)C2=C(N3[C]N(C=C3)C4=C(C=C(C5CCCC5)C=C4C6CCCC6)C7CCCC7)C(C8CCCC8)=CC(C9CCCC9)=C2	20	K3PO4	toluene	130	16	62
CO024	Table 1	15	CN1C(C(OC)=O)=CC2=C1C=CC=C2	C1(CCCB2C3CCCC2CCC3)=CC=CC=C1	CN1C(C(CCC2=CC=CC=C2)=O)=CC3=C1C=CC=C13	Ni(COD)(dq)	10	IPr-Cyp	C1(CCCC1)C2=C(N3[C]N(C=C3)C4=C(C=C(C5CCCC5)C=C4C6CCCC6)C7CCCC7)C(C8CCCC8)=CC(C9CCCC9)=C2	20	K3PO4	toluene	130	16	44
CO025	Table 1	3	C=C(OP(OC1=CC=CC=C1)(OC2=CC=CC=C2)=O)C3=CC4=CC=CC=C4C=C3	CC(CO1)(C)COB1C2=CC=CC=C2	C=C(C1=CC=CC=C1)C2=CC3=CC=CC=C3C=C2	Ni(COD)2	4	PPh3	P(C1=CC=CC=C1)(C2=CC=CC=C2)C3=CC=CC=C3	8	K3PO4	THF	70	24	42
CO025	Table 1	4	C=C(OP(OC1=CC=CC=C1)(OC2=CC=CC=C2)=O)C3=CC4=CC=CC=C4C=C3	CC(CO1)(C)COB1C2=CC=CC=C2	C=C(C1=CC=CC=C1)C2=CC3=CC=CC=C3C=C2	Ni(COD)2	4	PCy3	P(C1CCCCC1)(C2CCCCC2)C3CCCCC3	8	K3PO4	THF	70	17	89
CO025	Table 1	5	C=C(OP(OC1=CC=CC=C1)(OC2=CC=CC=C2)=O)C3=CC4=CC=CC=C4C=C3	CC(CO1)(C)COB1C2=CC=CC=C2	C=C(C1=CC=CC=C1)C2=CC3=CC=CC=C3C=C2	Ni(COD)2	4	PCy3	P(C1CCCCC1)(C2CCCCC2)C3CCCCC3	8	K3PO4	dioxane	65	16	68
CO025	Table 1	7	C=C(OP(OC1=CC=CC=C1)(OC2=CC=CC=C2)=O)C3=CC4=CC=CC=C4C=C3	CC(CO1)(C)COB1C2=CC=CC=C2	C=C(C1=CC=CC=C1)C2=CC3=CC=CC=C3C=C2	Ni(COD)2	4	PCy3	P(C1CCCCC1)(C2CCCCC2)C3CCCCC3	8	K3PO4	THF	65	16	92
CO025	Table 1	8	C=C(OP(OC1=CC=CC=C1)(OC2=CC=CC=C2)=O)C3=CC4=CC=CC=C4C=C3	OB(O)C1=CC=CC=C1	C=C(C1=CC=CC=C1)C2=CC3=CC=CC=C3C=C2	Ni(COD)2	2	PCy3	P(C1CCCCC1)(C2CCCCC2)C3CCCCC3	8	K3PO4	THF	65	17	84
CO025	Table 1	9	C=C(OP(OC1=CC=CC=C1)(OC2=CC=CC=C2)=O)C3=CC4=CC=CC=C4C=C3	OB(O)C1=CC=CC=C1	C=C(C1=CC=CC=C1)C2=CC3=CC=CC=C3C=C2	Ni(COD)2	4	PCy3	P(C1CCCCC1)(C2CCCCC2)C3CCCCC3	8	K3PO4	THF	65	17	72
CO026	Table 1	3	COC1=CC2=CC=CC=C2C=C1	C[Mg]Br	CC1=CC2=CC=CC=C2C=C1	NiCl2(PCy3)2	5	PCy3	P(C1CCCCC1)(C2CCCCC2)C3CCCCC3	10	N/A	toluene	80	0.33	96
CO026	Table 1	4	COC1=CC2=CC=CC=C2C=C1	C[Mg]Br	CC1=CC2=CC=CC=C2C=C1	NiCl2(PCy3)2	2	PCy3	P(C1CCCCC1)(C2CCCCC2)C3CCCCC3	4	N/A	toluene	80	0.33	93
CO026	Table 1	8	COC1=CC2=CC=CC=C2C=C1	C[Mg]Br	CC1=CC2=CC=CC=C2C=C1	NiBr2	5	PCy3	P(C1CCCCC1)(C2CCCCC2)C3CCCCC3	10	N/A	toluene	80	0.33	60
CO026	Table 1	10	COC1=CC2=CC=CC=C2C=C1	C[Mg]Br	CC1=CC2=CC=CC=C2C=C1	Ni(acac)2	5	PCy3	P(C1CCCCC1)(C2CCCCC2)C3CCCCC3	10	N/A	toluene	80	0.33	90
CO026	Table 1	16	COC1=CC2=CC=CC=C2C=C1	C[Mg]Br	CC1=CC2=CC=CC=C2C=C1	NiCl2(PCy3)2	5	PCy3	P(C1CCCCC1)(C2CCCCC2)C3CCCCC3	10	N/A	dioxane	80	0.33	49
CO026	Table 1	17	COC1=CC2=CC=CC=C2C=C1	C[Mg]Br	CC1=CC2=CC=CC=C2C=C1	NiCl2(PCy3)2	5	PCy3	P(C1CCCCC1)(C2CCCCC2)C3CCCCC3	10	N/A	THF	80	1	62
CO026	Table 1	18	COC1=CC2=CC=CC=C2C=C1	C[Mg]Br	CC1=CC2=CC=CC=C2C=C1	NiCl2(PCy3)2	5	PCy3	P(C1CCCCC1)(C2CCCCC2)C3CCCCC3	10	N/A	Et2O	80	1	90
CO027	Table 1	9	O=C(C1=CC=C(OS(C2=CC=C(C)C=C2)(=O)=O)C=C1)OCC	O=C(C1=CC=CC(C[Zn]([Li])(Cl)Cl)=C1)OCC	O=C(C1=CC=C(CC2=CC=CC(C(OCC)=O)=C2)C=C1)OCC	Ni(acac)2	0.5	PPh3	P(C1=CC=CC=C1)(C2=CC=CC=C2)C3=CC=CC=C3	2	N/A	THF	60	2	65
CO027	Table 1	10	CC1=CC=C(S(OC2=CC=CC=C2OC)(=O)=O)C=C1	O=C(C1=CC=CC(C[Zn]([Li])(Cl)Cl)=C1)OCC	O=C(C1=CC(CC2=C(OC)C=CC=C2)=CC=C1)OCC	Ni(acac)2	0.5	PPh3	P(C1=CC=CC=C1)(C2=CC=CC=C2)C3=CC=CC=C3	2	N/A	THF	60	24	85
CO027	Table 1	11	CC1=CC=C(S(OC2=CC=CC3=C2N=CC=C3)(=O)=O)C=C1	O=C(C1=CC=CC(C[Zn]([Li])(Cl)Cl)=C1)OCC	O=C(C1=CC(CC2=C3C(C=CC=N3)=CC=C2)=CC=C1)OCC	Ni(acac)2	0.5	PPh3	P(C1=CC=CC=C1)(C2=CC=CC=C2)C3=CC=CC=C3	2	N/A	THF	60	3	69
CO027	Table 1	13	CC1=NC2=C(C(OS(C3=CC=C(C)C=C3)(=O)=O)=C1)C=CC=C2	O=C(C1=CC=CC(C[Zn]([Li])(Cl)Cl)=C1)C(C)(C)C	CC1=NC2=CC=CC=C2C(CC3=CC(C(C(C)(C)C)=O)=CC=C3)=C1	Ni(acac)2	0.5	PPh3	P(C1=CC=CC=C1)(C2=CC=CC=C2)C3=CC=CC=C3	2	N/A	THF	60	16	92
CO027	Table 1	14	CC1=NC=CC(OS(C2=CC=C(C)C=C2)(=O)=O)=C1	O=C(C1=CC=CC(C[Zn]([Li])(Cl)Cl)=C1)C(C)(C)C	CC1=NCCC(CC2=CC(C(C(C)(C)C)=O)=CC=C2)=C1	Ni(acac)2	0.5	PPh3	P(C1=CC=CC=C1)(C2=CC=CC=C2)C3=CC=CC=C3	2	N/A	THF	60	16	84
CO028	Table 3	6	CC(C=C1)=CC=C1S(OC2=CC=C(C#N)C=C2)(=O)=O	OB(O)C1=CC=CC=C1	N#CC1=CC=C(C2=CC=CC=C2)C=C1	3	2	PPh3	P(C1=CC=CC=C1)(C2=CC=CC=C2)C3=CC=CC=C3	10	K3PO4	dioxane	100	24	99
CO028	Table 4	6	CS(OC1=C2C(C=CC=C2)=CC=C1)(=O)=O	OB(O)C1=CC=CC=C1	C1(C2=CC=CC=C2)=C3C(C=CC=C3)=CC=C1	3	2	PPh3	P(C1=CC=CC=C1)(C2=CC=CC=C2)C3=CC=CC=C3	20	K3PO4	dioxane	100	24	99
CO029	Table 1	8	O=C(C1=CC=CC=C1)COC2=CC=CC=C2	OB(O)C1=CC=CC=C1	O=C(C1=CC=CC=C1)CC2=CC=CC=C2	NiCl2(PCy3)2	10	PCy3	P(C1CCCCC1)(C2CCCCC2)C3CCCCC3	20	NaOtBu	toluene/DMF	100	0.67	64
CO029	Table S1	11	O=C(COC(C(C)(C)C)=O)C1=CC=CC=C1	B1(C2=CC=CC=C2)OB(C3=CC=CC=C3)OB(C4=CC=CC=C4)O1	O=C(C1=CC=CC=C1)CC2=CC=CC=C2	NiCl2(PCy3)2	10	PCy3	P(C1CCCCC1)(C2CCCCC2)C3CCCCC3	20	NaOtBu	toluene	100	10	41
CO029	Table S1	12	O=C(COC(C(C)(C)C)=O)C1=CC=CC=C1	B1(C2=CC=CC=C2)OB(C3=CC=CC=C3)OB(C4=CC=CC=C4)O1	O=C(C1=CC=CC=C1)CC2=CC=CC=C2	NiCl2(PCy3)2	10	PCy3	P(C1CCCCC1)(C2CCCCC2)C3CCCCC3	20	NaOtBu	toluene	80	3	43
CO029	Table S1	17	O=C(COC(C(C)(C)C)=O)C1=CC=CC=C1	B1(C2=CC=CC=C2)OB(C3=CC=CC=C3)OB(C4=CC=CC=C4)O1	O=C(C1=CC=CC=C1)CC2=CC=CC=C2	NiCl2(PCy3)2	10	PCy3	P(C1CCCCC1)(C2CCCCC2)C3CCCCC3	20	NaOtBu	toluene/DMF	100	0.67	65
CO029	Table S1	18	O=C(COC(C(C)(C)C)=O)C1=CC=CC=C1	B1(C2=CC=CC=C2)OB(C3=CC=CC=C3)OB(C4=CC=CC=C4)O1	O=C(C1=CC=CC=C1)CC2=CC=CC=C2	NiCl2(PCy3)2	10	PCy3	P(C1CCCCC1)(C2CCCCC2)C3CCCCC3	20	NaOtBu	toluene/DMF	100	0.67	75
CO029	Table S1	19	O=C(COC(C(C)(C)C)=O)C1=CC=CC=C1	B1(C2=CC=CC=C2)OB(C3=CC=CC=C3)OB(C4=CC=CC=C4)O1	O=C(C1=CC=CC=C1)CC2=CC=CC=C2	NiCl2(PCy3)2	10	PCy3	P(C1CCCCC1)(C2CCCCC2)C3CCCCC3	20	NaOtBu	toluene/DMF	100	0.67	81
CO029	Table S1	20	O=C(COC(C(C)(C)C)=O)C1=CC=CC=C1	B1(C2=CC=CC=C2)OB(C3=CC=CC=C3)OB(C4=CC=CC=C4)O1	O=C(C1=CC=CC=C1)CC2=CC=CC=C2	NiCl2(PCy3)2	10	PCy3	P(C1CCCCC1)(C2CCCCC2)C3CCCCC3	20	NaOtBu	toluene/DMF	90	2	71
CO029	Table S1	21	O=C(COC(C(C)(C)C)=O)C1=CC=CC=C1	B1(C2=CC=CC=C2)OB(C3=CC=CC=C3)OB(C4=CC=CC=C4)O1	O=C(C1=CC=CC=C1)CC2=CC=CC=C2	NiCl2(PCy3)2	10	PCy3	P(C1CCCCC1)(C2CCCCC2)C3CCCCC3	20	NaOtBu	toluene/DMF	80	3	76
CO029	Table S1	22	O=C(COC(C(C)(C)C)=O)C1=CC=CC=C1	B1(C2=CC=CC=C2)OB(C3=CC=CC=C3)OB(C4=CC=CC=C4)O1	O=C(C1=CC=CC=C1)CC2=CC=CC=C2	NiCl2(PCy3)2	10	PCy3	P(C1CCCCC1)(C2CCCCC2)C3CCCCC3	20	NaOtBu	toluene/DMF	100	0.67	71
CO030	Table 1	2	CC(C)(C(OC1=C2C(C=CC=C2)=CC3=CC=CC=C31)=O)C	OB(O)C1=CC=CC=C1	C1(C2=CC=CC=C2)=C3C(C=CC=C3)=CC4=CC=CC=C41	1	2	PCy3	P(C1CCCCC1)(C2CCCCC2)C3CCCCC3	2	K3PO4	toluene	100	6	97
CO030	Table 1	3	CC(C)(C(OC1=C2C(C=CC=C2)=CC3=CC=CC=C31)=O)C	OB(O)C1=CC=CC=C1	C1(C2=CC=CC=C2)=C3C(C=CC=C3)=CC4=CC=CC=C41	1	1	PCy3	P(C1CCCCC1)(C2CCCCC2)C3CCCCC3	2	K3PO4	toluene	100	6	96
CO030	Table 1	4	CC(C)(C(OC1=C2C(C=CC=C2)=CC3=CC=CC=C31)=O)C	OB(O)C1=CC=CC=C1	C1(C2=CC=CC=C2)=C3C(C=CC=C3)=CC4=CC=CC=C41	1	0.5	PCy3	P(C1CCCCC1)(C2CCCCC2)C3CCCCC3	2	K3PO4	toluene	100	6	96
CO030	Table 1	5	CC(C)(C(OC1=C2C(C=CC=C2)=CC3=CC=CC=C31)=O)C	OB(O)C1=CC=CC=C1	C1(C2=CC=CC=C2)=C3C(C=CC=C3)=CC4=CC=CC=C41	1	0.5	PCy3	P(C1CCCCC1)(C2CCCCC2)C3CCCCC3	2	K3PO4	toluene	100	6	93
CO030	Table 1	6	CC(C)(C(OC1=C2C(C=CC=C2)=CC3=CC=CC=C31)=O)C	OB(O)C1=CC=CC=C1	C1(C2=CC=CC=C2)=C3C(C=CC=C3)=CC4=CC=CC=C41	1	0.5	PCy3	P(C1CCCCC1)(C2CCCCC2)C3CCCCC3	2	K3PO4	toluene	100	6	79
CO030	Table 1	7	CC(C)(C(OC1=C2C(C=CC=C2)=CC3=CC=CC=C31)=O)C	OB(O)C1=CC=CC=C1	C1(C2=CC=CC=C2)=C3C(C=CC=C3)=CC4=CC=CC=C41	1	0.5	PCy3	P(C1CCCCC1)(C2CCCCC2)C3CCCCC3	2	K3PO4	toluene	100	6	93
CO030	Table 1	8	CC(C)(C(OC1=C2C(C=CC=C2)=CC3=CC=CC=C31)=O)C	OB(O)C1=CC=CC=C1	C1(C2=CC=CC=C2)=C3C(C=CC=C3)=CC4=CC=CC=C41	1	0.5	PCy3	P(C1CCCCC1)(C2CCCCC2)C3CCCCC3	2	K3PO4	toluene	100	6	97
CO030	Table 1	10	CC(C)(C(OC1=C2C(C=CC=C2)=CC3=CC=CC=C32)=O)C	OB(O)C1=CC=CC=C1	C1(C2=CC=CC=C2)=C3C(C=CC=C3)=CC4=CC=CC=C42	1	0.1	PCy3	P(C1CCCCC1)(C2CCCCC2)C3CCCCC3	2	K3PO4	toluene	100	6	82
CO030	Table 1	14	CC(C)(C(OC1=C2C(C=CC=C2)=CC3=CC=CC=C31)=O)C	OB(O)C1=CC=CC=C1	C1(C2=CC=CC=C2)=C3C(C=CC=C3)=CC4=CC=CC=C41	NiCl2(PCy3)2	0.5	PCy3	P(C1CCCCC1)(C2CCCCC2)C3CCCCC3	3	K3PO4	toluene	100	6	93
CO030	Table 1	15	CC(C)(C(OC1=C2C(C=CC=C2)=CC3=CC=CC=C31)=O)C	OB(O)C1=CC=CC=C1	C1(C2=CC=CC=C2)=C3C(C=CC=C3)=CC4=CC=CC=C41	2	0.5	PCy3	P(C1CCCCC1)(C2CCCCC2)C3CCCCC3	2	K3PO4	toluene	100	6	83
CO030	Table 2	2	O=C(OC1=C2C(C=CC=C2)=CC3=CC=CC=C31)N(CC)CC	OB(O)C1=CC=CC=C1	C1(C2=CC=CC=C2)=C3C(C=CC=C3)=CC4=CC=CC=C41	1	0.5	PCy3	P(C1CCCCC1)(C2CCCCC2)C3CCCCC3	2	K3PO4	toluene	100	6	99
CO030	Table 2	3	O=C(OC1=C2C(C=CC=C2)=CC3=CC=CC=C31)C(C)C	OB(O)C1=CC=CC=C1	C1(C2=CC=CC=C2)=C3C(C=CC=C3)=CC4=CC=CC=C41	1	0.5	PCy3	P(C1CCCCC1)(C2CCCCC2)C3CCCCC3	2	K3PO4	toluene	100	6	71
CO030	Table 2	4	O=C(OC1=C2C(C=CC=C2)=CC3=CC=CC=C31)CC	OB(O)C1=CC=CC=C1	C1(C2=CC=CC=C2)=C3C(C=CC=C3)=CC4=CC=CC=C41	1	0.5	PCy3	P(C1CCCCC1)(C2CCCCC2)C3CCCCC3	2	K3PO4	toluene	100	6	86
CO030	Table 2	5	O=C(OC1=C2C(C=CC=C2)=CC3=CC=CC=C31)C	OB(O)C1=CC=CC=C1	C1(C2=CC=CC=C2)=C3C(C=CC=C3)=CC4=CC=CC=C41	1	0.5	PCy3	P(C1CCCCC1)(C2CCCCC2)C3CCCCC3	2	K3PO4	toluene	100	6	75
CO030	Table 2	6	O=C(OC1=C2C(C=CC=C2)=CC3=CC=CC=C31)C4=CC=CC=C4	OB(O)C1=CC=CC=C1	C1(C2=CC=CC=C2)=C3C(C=CC=C3)=CC4=CC=CC=C41	1	0.5	PCy3	P(C1CCCCC1)(C2CCCCC2)C3CCCCC3	2	K3PO4	toluene	100	6	89
CO030	Table 2	7	O=C(OC1=C2C(C=CC=C2)=CC3=CC=CC=C31)C4=C(C)C=C(C)C=C4C	OB(O)C1=CC=CC=C1	C1(C2=CC=CC=C2)=C3C(C=CC=C3)=CC4=CC=CC=C41	1	5	PCy3	P(C1CCCCC1)(C2CCCCC2)C3CCCCC3	20	K3PO4	toluene	100	24	95
CO031	Table 1	1	CC(OC(OC1=CC2=CC=CC=C2C=C1)=O)(C)C	O=C(CC1=CC=CC=C1)C2=CC=CC=C2	O=C(C(C1=CC=C(C=CC=C2)C2=C1)C3=CC=CC=C3)C4=CC=CC=C4	Ni(COD)2	10	dcypt	C1(P(C2CCCCC2)C3CCCCC3)=CSC=C1P(C4CCCCC4)C5CCCCC5	20	K3PO4	toluene	150	24	91
CO031	Table 1	2	O=C(N(C)C)OC1=CC2=CC=CC=C2C=C1	O=C(CC1=CC=CC=C1)C2=CC=CC=C2	O=C(C(C1=CC=C(C=CC=C2)C2=C1)C3=CC=CC=C3)C4=CC=CC=C4	Ni(COD)2	10	dcypt	C1(P(C2CCCCC2)C3CCCCC3)=CSC=C1P(C4CCCCC4)C5CCCCC5	20	K3PO4	toluene	150	24	77
CO031	Table 1	4	O=C(OC1=CC2=CC=CC=C2C=C1)OC(C)(C)C	O=C(CC1=CC=CC=C1)C2=CC=CC=C2	O=C(C(C1=CC=C(C=CC=C2)C2=C1)C3=CC=CC=C3)C4=CC=CC=C4	Ni(COD)2	10	dcypt	C1(P(C2CCCCC2)C3CCCCC3)=CSC=C1P(C4CCCCC4)C5CCCCC5	20	K3PO4	toluene	150	24	49
CO031	Table 1	6	O=P(OC1=CC2=CC=CC=C2C=C1)(OCC)OCC	O=C(CC1=CC=CC=C1)C2=CC=CC=C2	O=C(C(C1=CC=C(C=CC=C2)C2=C1)C3=CC=CC=C3)C4=CC=CC=C4	Ni(COD)2	10	dcypt	C1(P(C2CCCCC2)C3CCCCC3)=CSC=C1P(C4CCCCC4)C5CCCCC5	20	K3PO4	toluene	150	24	43
CO031	Table 1	8	O=C(N(C)C)OC1=CC2=CC=CC=C2C=C1	O=C(CC1=CC=C(OC)C=C1)OC	O=C(C(C1=CC=C(C=CC=C2)C2=C1)C3=CC=C(OC)C=C3)OC	Ni(COD)2	10	dcypt	C1(P(C2CCCCC2)C3CCCCC3)=CSC=C1P(C4CCCCC4)C5CCCCC5	20	K3PO4	toluene	150	24	49
CO031	Table 1	10	O=C(OC1=CC2=CC=CC=C2C=C1)OC(C)(C)C	O=C(CC1=CC=C(OC)C=C1)OC	O=C(C(C1=CC=C(C=CC=C2)C2=C1)C3=CC=C(OC)C=C3)OC	Ni(COD)2	10	dcypt	C1(P(C2CCCCC2)C3CCCCC3)=CSC=C1P(C4CCCCC4)C5CCCCC5	20	K3PO4	toluene	150	24	47
CO031	Table 1	13	CC(OC(OC1=CC2=CC=CC=C2C=C1)=O)(C)C	O=C(N1C)CC2=C1C=CC=C2	O=C(N1C)C(C2=CC(C=CC=C3)=C3C=C2)C4=C1C=CC=C4	Ni(COD)2	5	dcypt	C1(P(C2CCCCC2)C3CCCCC3)=CSC=C1P(C4CCCCC4)C5CCCCC5	10	K3PO4	toluene	150	24	46
CO031	Table 1	14	O=C(N(C)C)OC1=CC2=CC=CC=C2C=C1	O=C(N1C)CC2=C1C=CC=C2	O=C(N1C)C(C2=CC(C=CC=C3)=C3C=C2)C4=C1C=CC=C4	Ni(COD)2	10	dcypt	C1(P(C2CCCCC2)C3CCCCC3)=CSC=C1P(C4CCCCC4)C5CCCCC5	20	K3PO4	toluene	150	24	76
CO031	Table 1	17	CC1=CC=C(S(OC2=CC3=CC=CC=C3C=C2)(=O)=O)C=C1	O=C(N1C)CC2=C1C=CC=C2	O=C(N1C)C(C2=CC(C=CC=C3)=C3C=C2)C4=C1C=CC=C4	Ni(COD)2	10	dcypt	C1(P(C2CCCCC2)C3CCCCC3)=CSC=C1P(C4CCCCC4)C5CCCCC5	20	K3PO4	toluene	150	24	76
CO032	Table 1	10	C1(OC2=NC(OC3=CC=CC=C3)=NC(OC4=CC=CC=C4)=N2)=CC=CC=C1	C=CC1=CC=CC=C1	C1(/C=C/C2=CC=CC=C2)=CC=CC=C1	Ni(COD)2	12	dppf	C1=CC=C(C=C1)P([C-]2C=CC=C2)C3=CC=CC=C3.C1=CC=C(C=C1)P([C-]2C=CC=C2)C3=CC=CC=C3.[Fe+2]	12	K3PO4	dioxane	110	Overnight	65
CO032	Table 1	12	C1(OC2=NC(OC3=CC=CC=C3)=NC(OC4=CC=CC=C4)=N2)=CC=CC=C1	C=CC1=CC=CC=C1	C1(/C=C/C2=CC=CC=C2)=CC=CC=C1	Ni(COD)2	12	dppp	P(CCCP(C1=CC=CC=C1)C2=CC=CC=C2)(C3=CC=CC=C3)C4=CC=CC=C4	12	K3PO4	dioxane	110	Overnight	56
CO032	Table 1	14	C1(OC2=NC(OC3=CC=CC=C3)=NC(OC4=CC=CC=C4)=N2)=CC=CC=C1	C=CC1=CC=CC=C1	C1(/C=C/C2=CC=CC=C2)=CC=CC=C1	Ni(COD)2	12	dppf	C1=CC=C(C=C1)P([C-]2C=CC=C2)C3=CC=CC=C3.C1=CC=C(C=C1)P([C-]2C=CC=C2)C3=CC=CC=C3.[Fe+2]	12	K3PO4	dioxane	110	Overnight	83
CO033	Table 1	2	O=C(OC1=CC2=CC=CC=C2C=C1)OC(C)(C)C	COC1=CC=C(B(O)O)C=C1	COC1=CC=C(C2=CC(C=CC=C3)=C3C=C2)C=C1	Ni(dippf)(o-tolyl)Cl	2.5	dippf	[H][C-]1C=CC(P(C(C)C)C(C)C)=C1.[H][C-]1C=CC(P(C(C)C)C(C)C)=C1.[Fe+2]	2.5	K3PO4	toluene	80	24	61
CO033	Table 1	3	O=C(OC1=CC2=CC=CC=C2C=C1)OC(C)(C)C	COC1=CC=C(B(O)O)C=C1	COC1=CC=C(C2=CC(C=CC=C3)=C3C=C2)C=C1	Ni(dcypf)(o-tolyl)Cl	2.5	dcypf	C1(CCCCC1)P(C2CCCCC2)[C-]3C=CC=C3.C4(CCCCC4)P(C5CCCCC5)[C-]6C=CC=C6.[Fe+2]	2.5	K3PO4	toluene	80	24	99
CO033	Table 1	4	O=C(OC1=CC2=CC=CC=C2C=C1)OC(C)(C)C	COC1=CC=C(B(O)O)C=C1	COC1=CC=C(C2=CC(C=CC=C3)=C3C=C2)C=C1	Ni(dcypf)(o-tolyl)Cl	2.5	dcypf	C1(CCCCC1)P(C2CCCCC2)[C-]3C=CC=C3.C4(CCCCC4)P(C5CCCCC5)[C-]6C=CC=C6.[Fe+2]	2.5	K3PO4	toluene	80	4	99
CO033	Table 1	5	O=C(OC1=CC2=CC=CC=C2C=C1)OC(C)(C)C	COC1=CC=C(B(O)O)C=C1	COC1=CC=C(C2=CC(C=CC=C3)=C3C=C2)C=C1	Ni(dcypf)(o-tolyl)Cl	2.5	dcypf	C1(CCCCC1)P(C2CCCCC2)[C-]3C=CC=C3.C4(CCCCC4)P(C5CCCCC5)[C-]6C=CC=C6.[Fe+2]	2.5	K3PO4	toluene	80	2	90
CO033	Table 1	6	O=C(OC1=CC2=CC=CC=C2C=C1)OC(C)(C)C	COC1=CC=C(B(O)O)C=C1	COC1=CC=C(C2=CC(C=CC=C3)=C3C=C2)C=C1	Ni(dcypf)(o-tolyl)Cl	2.5	dcypf	C1(CCCCC1)P(C2CCCCC2)[C-]3C=CC=C3.C4(CCCCC4)P(C5CCCCC5)[C-]6C=CC=C6.[Fe+2]	2.5	K3PO4	toluene	60	4	92
CO033	Table 1	12	O=C(OC1=CC2=CC=CC=C2C=C1)OC(C)(C)C	COC1=CC=C(B(O)O)C=C1	COC1=CC=C(C2=CC(C=CC=C3)=C3C=C2)C=C1	Ni(dcypf)(o-tolyl)Cl	1	dcypf	C1(CCCCC1)P(C2CCCCC2)[C-]3C=CC=C3.C4(CCCCC4)P(C5CCCCC5)[C-]6C=CC=C6.[Fe+2]	1	K3PO4	toluene	60	4	57
CO033	Table 1	13	O=C(OC1=CC2=CC=CC=C2C=C1)OC(C)(C)C	COC1=CC=C(B(O)O)C=C1	COC1=CC=C(C2=CC(C=CC=C3)=C3C=C2)C=C1	Ni(dcypf)(o-tolyl)Cl	2	dcypf	C1(CCCCC1)P(C2CCCCC2)[C-]3C=CC=C3.C4(CCCCC4)P(C5CCCCC5)[C-]6C=CC=C6.[Fe+2]	2	K3PO4	toluene	60	4	74
CO034	Figure 1	N/A	COC1=CC=C(OS(=O)(C(F)(F)F)=O)C=C1	C1=CCCC1	COC1=CC=C(C2=CCCC2)C=C1	Ni(OAc)2	5	dippe	CC(P(CCP(C(C)C)C(C)C)C(C)C)C	6	N/A	DMA	100	24	76
CO034	Figure 1	N/A	COC1=CC=C(OS(=O)(C(F)(F)F)=O)C=C1	C1=CCCC1	COC1=CC=C(C2=CCCC2)C=C1	Ni(OAc)2	5	dcype	P(CCP(C1CCCCC1)C2CCCCC2)(C3CCCCC3)C4CCCCC4	6	N/A	DMA	100	24	83
CO034	Figure 1	N/A	COC1=CC=C(OS(=O)(C(F)(F)F)=O)C=C1	C1=CCCC1	COC1=CC=C(C2=CCCC2)C=C1	Ni(OAc)2	5	(R,R)-Ph-BPE	P1([C@@H](C2=CC=CC=C2)CC[C@@H]1C3=CC=CC=C3)CCP4[C@@H](C5=CC=CC=C5)CC[C@@H]4C6=CC=CC=C6	6	N/A	DMA	100	24	99
CO034	Scheme 2	a	CS(OC1=CC2=CC=CC=C2C=C1)(=O)=O	C1=CCCC1	C12=CC=CC=C1C=C(C3=CCCC3)C=C2	NiBr2•DME	5	dppp	P(CCCP(C1=CC=CC=C1)C2=CC=CC=C2)(C3=CC=CC=C3)C4=CC=CC=C4	6	N/A	dioxane	100	24	83
CO034	Scheme 2	b	CC1=CC=C(S(OC2=CC3=CC=CC=C3C=C2)(=O)=O)C=C1	C1=CCCC1	C12=CC=CC=C1C=C(C3=CCCC3)C=C2	NiBr2•DME	5	dppp	P(CCCP(C1=CC=CC=C1)C2=CC=CC=C2)(C3=CC=CC=C3)C4=CC=CC=C4	6	N/A	DMF	100	24	60
CO034	Scheme 2	b	CC1=CC=C(S(OC2=CC3=CC=CC=C3C=C2)(=O)=O)C=C1	C1=CCCC1	C12=CC=CC=C1C=C(C3=CCCC3)C=C2	NiBr2•DME	5	(R,R)-Ph-BPE	P1([C@@H](C2=CC=CC=C2)CC[C@@H]1C3=CC=CC=C3)CCP4[C@@H](C5=CC=CC=C5)CC[C@@H]4C6=CC=CC=C6	6	N/A	DMF	100	24	85
CO035	Table	1	C/C=C/CO[Si](CC)(CC)CC	Br[Mg]C1=CC=CC=C1	C/C=C/CC1=CC=CC=C1	NiCl2(dppf)	20	dppf	C1=CC=C(C=C1)P([C-]2C=CC=C2)C3=CC=CC=C3.C1=CC=C(C=C1)P([C-]2C=CC=C2)C3=CC=CC=C3.[Fe+2]	20	N/A	ether	Unknown	4	88
CO035	Table	2	C/C=C/CO[Si](CC)(CC)CC	Br[Mg]C1=CC=CC=C1	C/C=C/CC1=CC=CC=C1	NiCl2(dppp)	20	dppp	P(CCCP(C1=CC=CC=C1)C2=CC=CC=C2)(C3=CC=CC=C3)C4=CC=CC=C4	20	N/A	ether	Unknown	40	59
CO035	Table	3	C/C=C/CO[Si](CC)(CC)CC	Br[Mg]C1=CC=CC=C1	C/C=C/CC1=CC=CC=C1	NiCl2(PPh3)2	20	PPh3	P(C1=CC=CC=C1)(C2=CC=CC=C2)C3=CC=CC=C3	40	N/A	ether	Unknown	4	67
CO035	Table	8	C=CC(O[Si](CC)(CC)CC)C	Br[Mg]C1=CC=CC=C1	C=CC(C1=CC=CC=C1)C	NiCl2(dppf)	20	dppf	C1=CC=C(C=C1)P([C-]2C=CC=C2)C3=CC=CC=C3.C1=CC=C(C=C1)P([C-]2C=CC=C2)C3=CC=CC=C3.[Fe+2]	20	N/A	ether	Unknown	4	93
CO035	Table	9	C=CC(O[Si](CC)(CC)CC)C	Br[Mg]C1=CC=CC=C1	C=CC(C1=CC=CC=C1)C	NiCl2(dppp)	20	dppp	P(CCCP(C1=CC=CC=C1)C2=CC=CC=C2)(C3=CC=CC=C3)C4=CC=CC=C4	20	N/A	ether	Unknown	40	90
CO035	Table	10	C=CC(O[Si](CC)(CC)CC)C	Br[Mg]C1=CC=CC=C1	C=CC(C1=CC=CC=C1)C	NiCl2(PPh3)2	20	PPh3	P(C1=CC=CC=C1)(C2=CC=CC=C2)C3=CC=CC=C3	40	N/A	ether	Unknown	4	81
CO035	Table	13	CCC/C=C/O[Si](C)(C)C	Br[Mg]C1=CC=CC=C1	CCC/C=C/C1=CC=CC=C1	NiCl2(dppf)	20	dppf	C1=CC=C(C=C1)P([C-]2C=CC=C2)C3=CC=CC=C3.C1=CC=C(C=C1)P([C-]2C=CC=C2)C3=CC=CC=C3.[Fe+2]	20	N/A	ether	Unknown	20	83
CO036	Table 1	1	C/C=C/COC1=CC=CC=C1	CC[Mg]Br	C/C=C/CCC	NiCl2(dppb)	0.5	dppb	P(CCCCP(C1=CC=CC=C1)C2=CC=CC=C2)(C3=CC=CC=C3)C4=CC=CC=C4	0.5	N/A	ether	Unknown	24	80
CO036	Table 1	2	C/C=C/COC1=CC=CC=C1	Br[Mg]C1=CC=CC=C1	C/C=C/CC1=CC=CC=C1	NiCl2(dppb)	0.5	dppb	P(CCCCP(C1=CC=CC=C1)C2=CC=CC=C2)(C3=CC=CC=C3)C4=CC=CC=C4	0.5	N/A	ether	Unknown	120	85
CO036	Table 1	3	C=CC(C)OC1=CC=CC=C1	CC[Mg]Br	C=CC(C)CC	NiCl2(dppb)	0.5	dppb	P(CCCCP(C1=CC=CC=C1)C2=CC=CC=C2)(C3=CC=CC=C3)C4=CC=CC=C4	0.5	N/A	ether	Unknown	24	75
CO036	Table 1	4	C=CC(C)OC1=CC=CC=C1	Br[Mg]C1=CC=CC=C1	C=CC(C)C1=CC=CC=C1	NiCl2(dppb)	0.5	dppb	P(CCCCP(C1=CC=CC=C1)C2=CC=CC=C2)(C3=CC=CC=C3)C4=CC=CC=C4	0.5	N/A	ether	Unknown	40	78
CO036	Table 1	5	C=CC(C)OC1=CC=CC=C1	CC[Mg]Br	C=CC(C)C1=CC=CC=C1	NiCl2(dppb)	0.5	dppb	P(CCCCP(C1=CC=CC=C1)C2=CC=CC=C2)(C3=CC=CC=C3)C4=CC=CC=C4	0.5	N/A	ether	Unknown	60	85
CO036	Table 1	6	C1(OC2=CC=CC=C2)C=CCCC1	Br[Mg]C1=CC=CC=C1	CCC1C=CCCC1	NiCl2(dppb)	0.5	dppb	P(CCCCP(C1=CC=CC=C1)C2=CC=CC=C2)(C3=CC=CC=C3)C4=CC=CC=C4	0.5	N/A	ether	Unknown	22	85
CO036	Table 1	7	C1(OC2=CC=CC=C2)C=CCCC1	Br[Mg]C1=CC=CC=C1	C1(C2=CC=CC=C2)C=CCCC1	NiCl2(dppb)	0.5	dppb	P(CCCCP(C1=CC=CC=C1)C2=CC=CC=C2)(C3=CC=CC=C3)C4=CC=CC=C4	0.5	N/A	ether	Unknown	22	90
CO037	Table 1	4	O=C(OC(CCCCC)/C=C/C1=CC=CC=C1)OCC	COB(C1=CC=CC=C1)OC.CO[Li]	CCCCCC(C1=CC=CC=C1)/C=C/C2=CC=CC=C2	NiCl2(dppf)	10	dppf	C1=CC=C(C=C1)P([C-]2C=CC=C2)C3=CC=CC=C3.C1=CC=C(C=C1)P([C-]2C=CC=C2)C3=CC=CC=C3.[Fe+2]	10	N/A	THF	60	15	83
CO037	Table 1	5	O=C(OC(CCCCC)/C=C/C1=CC=CC=C1)OCC	COB(C1=CC(OC)=CC=C1)OC.CO[Li]	CCCCCC(C1=CC(OC)=CC=C1)/C=C/C2=CC=CC=C2	NiCl2(dppf)	10	dppf	C1=CC=C(C=C1)P([C-]2C=CC=C2)C3=CC=CC=C3.C1=CC=C(C=C1)P([C-]2C=CC=C2)C3=CC=CC=C3.[Fe+2]	10	N/A	THF	60	15	81
CO037	Table 1	6	O=C(OC(CCCCC)/C=C/C1=CC=CC=C1)OCC	COB(C1=CC=C(OC)C=C1)OC.CO[Li]	CCCCCC(C1=CC=C(OC)C=C1)/C=C/C2=CC=CC=C2	NiCl2(dppf)	10	dppf	C1=CC=C(C=C1)P([C-]2C=CC=C2)C3=CC=CC=C3.C1=CC=C(C=C1)P([C-]2C=CC=C2)C3=CC=CC=C3.[Fe+2]	10	N/A	THF	60	15	68
CO037	Table 1	7	O=C(OC(CCCCC)/C=C/C1=CC=CC=C1)OCC	COB(C1=CC=CO1)OC.CO[Li]	CCCCCC(C1=CC=CO1)/C=C/C2=CC=CC=C2	NiCl2(PPh3)2	10	PPh3	P(C1=CC=CC=C1)(C2=CC=CC=C2)C3=CC=CC=C3	20	N/A	THF	60	15	77
CO037	Table 1	8	O=C(OC(CCCCC)/C=C/C1=CC=CC=C1)OCC	COB(C1=CC=CO1)OC.CO[Li]	CCCCCC(C1=CC=CO1)/C=C/C2=CC=CC=C2	NiCl2(dppf)	10	dppf	C1=CC=C(C=C1)P([C-]2C=CC=C2)C3=CC=CC=C3.C1=CC=C(C=C1)P([C-]2C=CC=C2)C3=CC=CC=C3.[Fe+2]	10	N/A	THF	60	15	65
CO037	Table 1	9	O=C(OC(CCCCC)/C=C/C1=CC=CC=C1)OCC	C=C(C)B(OC)OC.CO[Li]	C=C(C)C(CCCCC)/C=C/C1=CC=CC=C1	NiCl2(dppf)	10	dppf	C1=CC=C(C=C1)P([C-]2C=CC=C2)C3=CC=CC=C3.C1=CC=C(C=C1)P([C-]2C=CC=C2)C3=CC=CC=C3.[Fe+2]	10	N/A	THF	60	15	46
CO037	Table 1	10	O=C(/C=C/C(CCCCC)OC(OCC)=O)OCC	COB(C1=CC=CO1)OC.CO[Li]	O=C(/C=C/C(CCCCC)C1=CC=CO1)OCC	NiCl2(dppf)	10	dppf	C1=CC=C(C=C1)P([C-]2C=CC=C2)C3=CC=CC=C3.C1=CC=C(C=C1)P([C-]2C=CC=C2)C3=CC=CC=C3.[Fe+2]	10	N/A	THF	60	15	67
CO038	Table 1	6	CCOC1N(C(OCC)=O)C2=CC=CC=C2C=C1	OB(O)C1=CC=C(C=C1)F	O=C(OCC)N1C2=CC=CC=C2C=CC1C3=CC=C(F)C=C3	Ni(COD)2	7.5	PPh3	P(C1=CC=CC=C1)(C2=CC=CC=C2)C3=CC=CC=C3	7.5	N/A	dioxane/tAmOH	40	16	74
CO038	Table 1	7	CCOC1N(C(OCC)=O)C2=CC=CC=C2C=C1	FC1=CC=C(B2OB(C3=CC=C(F)C=C3)OB(C4=CC=C(F)C=C4)O2)C=C1	O=C(OCC)N1C2=CC=CC=C2C=CC1C3=CC=C(F)C=C3	Ni(COD)2	7.5	PPh3	P(C1=CC=CC=C1)(C2=CC=CC=C2)C3=CC=CC=C3	7.5	N/A	dioxane/tAmOH	40	16	94
CO039	Table 1	2	O=C(OC1=CC=CC=C1)N(CC)CC	CN1C2=CC=CC=C2N=C1	CN1C2=CC=CC=C2N=C1C3=CC=CC=C3	Ni(COD)2	10	dcype	P(CCP(C1CCCCC1)C2CCCCC2)(C3CCCCC3)C4CCCCC4	12	K3PO4	tAmOH	110	12	83
CO039	Table 1	3	O=C(OC1=CC=CC=C1)N(CC)CC	CN1C2=CC=CC=C2N=C1	CN1C2=CC=CC=C2N=C1C3=CC=CC=C3	Ni(COD)2	10	dcype	P(CCP(C1CCCCC1)C2CCCCC2)(C3CCCCC3)C4CCCCC4	12	K3PO4	tBuOH	110	12	70
CO039	Table 1	7	O=C(OC1=CC=CC=C1)N(CC)CC	CN1C2=CC=CC=C2N=C1	CN1C2=CC=CC=C2N=C1C3=CC=CC=C3	Ni(COD)2	10	dcype	P(CCP(C1CCCCC1)C2CCCCC2)(C3CCCCC3)C4CCCCC4	12	Cs2CO3	tAmOH	110	12	44
CO039	Table 1	8	O=C(OC1=CC=CC=C1)N(CC)CC	CN1C2=CC=CC=C2N=C1	CN1C2=CC=CC=C2N=C1C3=CC=CC=C3	Ni(COD)2	10	dcype	P(CCP(C1CCCCC1)C2CCCCC2)(C3CCCCC3)C4CCCCC4	12	LiOtBu	tAmOH	110	12	59
CO039	Table 1	12	O=C(OC1=CC=CC=C1)N(CC)CC	CN1C2=CC=CC=C2N=C1	CN1C2=CC=CC=C2N=C1C3=CC=CC=C3	Ni(COD)2	10	dcypt	C1(P(C2CCCCC2)C3CCCCC3)=CSC=C1P(C4CCCCC4)C5CCCCC5	12	K3PO4	tAmOH	110	12	55
CO039	Table 1	13	O=C(OC1=CC=CC=C1)N(CC)CC	CN1C2=CC=CC=C2N=C1	CN1C2=CC=CC=C2N=C1C3=CC=CC=C3	Ni(COD)2	10	L1	C1(P(C2CCCCC2)C3CCCCC3)=C(P(C4CCCCC4)C5CCCCC5)SC6=C1C=CC=C6	12	K3PO4	tAmOH	110	12	63
CO039	Table 1	14	O=C(OC1=CC=CC=C1)N(CC)CC	CN1C2=CC=CC=C2N=C1	CN1C2=CC=CC=C2N=C1C3=CC=CC=C3	Ni(COD)2	10	L2	C1(P(C2CCCCC2)C3CCCCC3)=C(P(C4CCCCC4)C5CCCCC5)SCC1	12	K3PO4	tAmOH	110	12	64
CO039	Table 1	15	O=C(OC1=CC=CC=C1)N(CC)CC	CN1C2=CC=CC=C2N=C1	CN1C2=CC=CC=C2N=C1C3=CC=CC=C3	Ni(OTf)2	10	dcype	P(CCP(C1CCCCC1)C2CCCCC2)(C3CCCCC3)C4CCCCC4	12	K3PO4	tAmOH	110	12	82
CO040	Table 1	1	C=CCO	O=C1C(C(OCC)=O)CCCO1	O=C1C(C(OCC)=O)(C=C)CCCO1	Ni(COD)2	10	BINAP	C1(C2=C3C=CC=CC3=CC=C2P(C4=CC=CC=C4)C5=CC=CC=C5)=C6C=CC=CC6=CC=C1P(C7=CC=CC=C7)C8=CC=CC=C8	12	N/A	Et2O	0	19	53
CO040	Table 1	2	C=CCO	O=C1C(C(OCC)=O)CCCO1	O=C1C(C(OCC)=O)(C=C)CCCO1	Ni(COD)2	10	H8-BINAP	C1(C2=C3CCCCC3=CC=C2P(C4=CC=CC=C4)C5=CC=CC=C5)=C6CCCCC6=CC=C1P(C7=CC=CC=C7)C8=CC=CC=C8	12	N/A	Et2O	0	19	76
CO040	Table 1	3	C=CCO	O=C1C(C(OCC)=O)CCCO1	O=C1C(C(OCC)=O)(C=C)CCCO1	Ni(COD)2	10	SegPhos	C1(C2=C(COC3)C3=CC=C2P(C4=CC=CC=C4)C5=CC=CC=C5)=C6COCC6=CC=C1P(C7=CC=CC=C7)C8=CC=CC=C8	12	N/A	Et2O	0	19	93
CO040	Table 1	4	C=CCO	O=C1C(C(OCC)=O)CCCO1	O=C1C(C(OCC)=O)(C=C)CCCO1	Ni(COD)2	10	P-Phos	COC1=CC(P(C2=CC=CC=C2)C3=CC=CC=C3)=C(C4=C(OC)N=C(OC)C=C4P(C5=CC=CC=C5)C6=CC=CC=C6)C(OC)=N1	12	N/A	Et2O	0	19	82
CO040	Table 1	5	C=CCO	O=C1C(C(OCC)=O)CCCO1	O=C1C(C(OCC)=O)(C=C)CCCO1	Ni(COD)2	5	P-Phos	COC1=CC(P(C2=CC=CC=C2)C3=CC=CC=C3)=C(C4=C(OC)N=C(OC)C=C4P(C5=CC=CC=C5)C6=CC=CC=C6)C(OC)=N1	6	N/A	Et2O	0	19	62
CO040	Table 1	6	C=CCO	O=C1C(C(OCC)=O)CCCO1	O=C1C(C(OCC)=O)(C=C)CCCO1	Ni(COD)2	10	P-Phos	COC1=CC(P(C2=CC=CC=C2)C3=CC=CC=C3)=C(C4=C(OC)N=C(OC)C=C4P(C5=CC=CC=C5)C6=CC=CC=C6)C(OC)=N1	12	N/A	Et2O	23	19	86
CO040	Table 1	7	C=CCO	O=C1C(C(OCC)=O)CCCO1	O=C1C(C(OCC)=O)(C=C)CCCO1	Ni(COD)2	10	P-Phos	COC1=CC(P(C2=CC=CC=C2)C3=CC=CC=C3)=C(C4=C(OC)N=C(OC)C=C4P(C5=CC=CC=C5)C6=CC=CC=C6)C(OC)=N1	12	N/A	Et2O	-10	19	69
CO040	Table 1	8	C=CCO	O=C1C(C(OCC)=O)CCCO1	O=C1C(C(OCC)=O)(C=C)CCCO1	Ni(COD)2	10	P-Phos	COC1=CC(P(C2=CC=CC=C2)C3=CC=CC=C3)=C(C4=C(OC)N=C(OC)C=C4P(C5=CC=CC=C5)C6=CC=CC=C6)C(OC)=N1	12	N/A	Et2O	-10	48	80
CO041	Table 1	2	CCCCCC(/C=C/C(CCP(C1=CC=CC=C1)C2=CC=CC=C2)OC)=O	Br[Mg]C1=CC=CC=C1	CCCCCC(/C=C/C(CCC1=CC=CC=C1)OC)=O	NiCl2(PPh3)2	5	PPh3	P(C1=CC=CC=C1)(C2=CC=CC=C2)C3=CC=CC=C3	10	N/A	THF	22	3	70
CO041	Table 1	3	CCCCCC(/C=C/C(CCP(C1=CC=CC=C1)C2=CC=CC=C2)OC)=O	Br[Mg]C1=CC=CC=C1	CCCCCC(/C=C/C(CCC1=CC=CC=C1)OC)=O	NiCl2(PPh3)2	5	PPh3	P(C1=CC=CC=C1)(C2=CC=CC=C2)C3=CC=CC=C3	10	N/A	THF	22	24	70
CO041	Table 1	4	CCCCCC(/C=C/C(CCP(C1=CC=CC=C1)C2=CC=CC=C2)OC)=O	Br[Mg]C1=CC=CC=C1	CCCCCC(/C=C/C(CCC1=CC=CC=C1)OC)=O	NiCl2(PPh3)2	5	PPh3	P(C1=CC=CC=C1)(C2=CC=CC=C2)C3=CC=CC=C3	10	N/A	THF	22	18	70
CO042	Table 1	N/A	COC1=CCCCC1	Br[Mg]C1=CC=CC=C1	C1(C2=CC=CC=C2)=CCCCC1	NiCl2(PPh3)2	5	PPh3	P(C1=CC=CC=C1)(C2=CC=CC=C2)C3=CC=CC=C3	10	N/A	THF	48	reflux	71
CO042	Table 2	N/A	COC1=CC2=CC=CC=C2C=C1	Br[Mg]C1=CC=CC=C1	C12=CC=CC=C1C=C(C3=CC=CC=C3)C=C2	NiCl2(PPh3)2	5	PPh3	P(C1=CC=CC=C1)(C2=CC=CC=C2)C3=CC=CC=C3	10	N/A	THF	72	reflux	77
CO043	Table 1	13	CC1=CC=C(OS(C2=CC=C(C)C=C2)(=O)=O)C=C1	OB(O)C1=CC=CC=C1	C12=CC=CC=C1C=C(C3=CC=CC=C3)C=C2	Ni(COD)2	3	PBu3	CCCCP(CCCC)CCCC	12	K3PO4	THF	25	24	56
CO043	Table 1	15	CC1=CC=C(OS(C2=CC=C(C)C=C2)(=O)=O)C=C1	OB(O)C1=CC=CC=C1	C12=CC=CC=C1C=C(C3=CC=CC=C3)C=C2	Ni(COD)2	3	PCy3	P(C1CCCCC1)(C2CCCCC2)C3CCCCC3	3	K3PO4	THF	25	24	90
CO043	Table 1	16	CC1=CC=C(OS(C2=CC=C(C)C=C2)(=O)=O)C=C1	OB(O)C1=CC=CC=C1	C12=CC=CC=C1C=C(C3=CC=CC=C3)C=C2	Ni(COD)2	3	PCy3	P(C1CCCCC1)(C2CCCCC2)C3CCCCC3	6	K3PO4	THF	25	6	90
CO043	Table 1	17	CC1=CC=C(OS(C2=CC=C(C)C=C2)(=O)=O)C=C1	OB(O)C1=CC=CC=C1	C12=CC=CC=C1C=C(C3=CC=CC=C3)C=C2	Ni(COD)2	3	PCy3	P(C1CCCCC1)(C2CCCCC2)C3CCCCC3	12	K3PO4	THF	25	6	99
CO043	Table 2	1	CC1=CC=C(OS(C2=CC=C(C)C=C2)(=O)=O)C=C1	OB(O)C1=CC=CC=C1	C12=CC=CC=C1C=C(C3=CC=CC=C3)C=C2	Ni(COD)2	3	PCy3	P(C1CCCCC1)(C2CCCCC2)C3CCCCC3	12	K3PO4	THF	25	4	46
CO043	Table 2	4	CC1=CC=C(OS(C2=CC=C(C)C=C2)(=O)=O)C=C1	OB(O)C1=CC=CC=C1	C12=CC=CC=C1C=C(C3=CC=CC=C3)C=C2	Ni(COD)2	3	PCy3	P(C1CCCCC1)(C2CCCCC2)C3CCCCC3	12	K3PO4	THF	25	4	72
CO043	Table 2	5	CC1=CC=C(OS(C2=CC=C(C)C=C2)(=O)=O)C=C1	OB(O)C1=CC=CC=C1	C12=CC=CC=C1C=C(C3=CC=CC=C3)C=C2	Ni(COD)2	3	PCy3	P(C1CCCCC1)(C2CCCCC2)C3CCCCC3	12	KF	THF	25	4	54
CO043	Table 2	6	CC1=CC=C(OS(C2=CC=C(C)C=C2)(=O)=O)C=C1	OB(O)C1=CC=CC=C1	C12=CC=CC=C1C=C(C3=CC=CC=C3)C=C2	Ni(COD)2	3	PCy3	P(C1CCCCC1)(C2CCCCC2)C3CCCCC3	12	K2CO3	benzene-d6	25	4	61
CO044	Table 3	N/A	N#CC1=CC=C(OS(=O)(C(F)(F)F)=O)C=C1	O=C1C(C)CC2=CC=CC=C21	O=C1C(C)(C2=CC=C(C#N)C=C2)CC3=CC=CC=C31	Ni(COD)2	5	SegPhos	C1(C2=C(COC3)C3=CC=C2P(C4=CC=CC=C4)C5=CC=CC=C5)=C6COCC6=CC=C1P(C7=CC=CC=C7)C8=CC=CC=C8	6	NaOtBu	toluene	80	1	84
CO045	Table 1	1	COC/C=C/C1=CC=CC=C1	C=C	C=CC/C=C/C1=CC=CC=C1	Ni(COD)2	10	P(o-anisyl)3	COC(C=CC=C1)=C1P(C2=C(OC)C=CC=C2)C3=C(OC)C=CC=C3	20	NEt3	toluene	25	1.5	91
CO045	Table 1	2	CCOC/C=C/C1=CC=CC=C1	C=C	C=CC/C=C/C1=CC=CC=C1	Ni(COD)2	10	P(o-anisyl)3	COC(C=CC=C1)=C1P(C2=C(OC)C=CC=C2)C3=C(OC)C=CC=C3	20	NEt3	toluene	25	1.5	85
CO045	Table 1	3	C[Si](OC/C=C/C1=CC=CC=C1)(C)C	C=C	C=CC/C=C/C1=CC=CC=C1	Ni(COD)2	10	P(o-anisyl)3	COC(C=CC=C1)=C1P(C2=C(OC)C=CC=C2)C3=C(OC)C=CC=C3	20	NEt3	toluene	25	1.5	75
CO045	Table 1	4	OC/C=C/C1=CC=CC=C1	C=C	C=CC/C=C/C1=CC=CC=C1	Ni(COD)2	20	P(o-anisyl)3	COC(C=CC=C1)=C1P(C2=C(OC)C=CC=C2)C3=C(OC)C=CC=C3	40	NEt3	toluene	25	1.5	56
CO045	Table 1	5	O=C(OC/C=C/C1=CC=CC=C1)C	C=C	C=CC/C=C/C1=CC=CC=C1	Ni(COD)2	10	P(o-anisyl)3	COC(C=CC=C1)=C1P(C2=C(OC)C=CC=C2)C3=C(OC)C=CC=C3	20	NEt3	toluene	25	1.5	86
CO045	Table 1	7	O=C(OC/C=C/C1=CC=CC=C1)OC	C=C	C=CC/C=C/C1=CC=CC=C1	Ni(COD)2	2.5	P(o-anisyl)3	COC(C=CC=C1)=C1P(C2=C(OC)C=CC=C2)C3=C(OC)C=CC=C3	5	NEt3	toluene	25	1.5	91
CO046	Table 1	1	CCC(OC)C1=CC2=CC=CC=C2C=C1	C[Mg]I	CC(CC)C1=CC2=CC=CC=C2C=C1	Ni(COD)2	5	BINAP	C1(C2=C3C=CC=CC3=CC=C2P(C4=CC=CC=C4)C5=CC=CC=C5)=C6C=CC=CC6=CC=C1P(C7=CC=CC=C7)C8=CC=CC=C8	10	N/A	toluene	25	24	77
CO046	Table 1	3	CCC(OC)C1=CC2=CC=CC=C2C=C1	C[Mg]I	CC(CC)C1=CC2=CC=CC=C2C=C1	Ni(COD)2	5	DPEPhos	C1(P(C2=CC=CC=C2)C3=CC=CC=C3)=CC=CC=C1OC4=CC=CC=C4P(C5=CC=CC=C5)C6=CC=CC=C6	10	N/A	toluene	25	24	52
CO046	Table 1	4	CCC(OC)C1=CC2=CC=CC=C2C=C1	C[Mg]I	CC(CC)C1=CC2=CC=CC=C2C=C1	Ni(COD)2	5	Xantphos	CC1(C)C2=C(OC3=C1C=CC=C3P(C4=CC=CC=C4)C5=CC=CC=C5)C(P(C6=CC=CC=C6)C7=CC=CC=C7)=CC=C2	10	N/A	toluene	25	24	46
CO046	SI IV	4	CCC(OCC1=CC=CC=C1)C2=CC3=CC=CC=C3C=C2	C[Mg]I	CC(CC)C1=CC2=CC=CC=C2C=C1	Ni(COD)2	5	BINAP	C1(C2=C3C=CC=CC3=CC=C2P(C4=CC=CC=C4)C5=CC=CC=C5)=C6C=CC=CC6=CC=C1P(C7=CC=CC=C7)C8=CC=CC=C8	10	N/A	toluene	35	24	83
CO046	SI IV	5	CCC(OCC1=CC=CC=C1)C2=CC3=CC=CC=C3C=C2	C[Mg]I	CC(CC)C1=CC2=CC=CC=C2C=C1	Ni(COD)2	5	DPEPhos	C1(P(C2=CC=CC=C2)C3=CC=CC=C3)=CC=CC=C1OC4=CC=CC=C4P(C5=CC=CC=C5)C6=CC=CC=C6	10	N/A	toluene	35	24	42
CO047	Table 3	1	O=C(OC1=CC=CC2=CC=CC=C21)N(CC)CC	CC1=CC=C(B(O)O)C=C1	CC(C=C1)=CC=C1C2=CC=CC3=CC=CC=C32	NiCl2(PCy3)2	5	PCy3	P(C1CCCCC1)(C2CCCCC2)C3CCCCC3	10	K3PO4	toluene	130	24	86
CO047	Table 3	1	O=S(OC1=CC=CC2=CC=CC=C21)(N(C)C)=O	CC1=CC=C(B(O)O)C=C1	CC(C=C1)=CC=C1C2=CC=CC3=CC=CC=C32	NiCl2(PCy3)2	5	PCy3	P(C1CCCCC1)(C2CCCCC2)C3CCCCC3	10	K3PO4	toluene	110	24	95
CO048	Table 4	N/A	O=S(OC1=CC2=CC=CC=C2C=C1)(C(F)(F)F)=O	CC(C)([Mg]Cl)C	CC(C1=CC2=CC=CC=C2C=C1)(C)C	NiCl2•(H2O)1.5	10	ICy	C1(N2[C]N(C=C2)C3CCCCC3)CCCCC1	10	N/A	THF	-10	1.5	77
CO049	Table 1	2	O=S(OC(C=C1)=CC=C1C2=CC=CC=C2)(C(F)(F)F)=O	C=COCCCC	O=C(C)C(C=C1)=CC=C1C2=CC=CC=C2	Ni(COD)2	5	dppp	P(CCCP(C1=CC=CC=C1)C2=CC=CC=C2)(C3=CC=CC=C3)C4=CC=CC=C4	5	NMeCy2	dioxane	100	20	46
CO049	Table 1	3	O=S(OC(C=C1)=CC=C1C2=CC=CC=C2)(C(F)(F)F)=O	C=COCCCC	O=C(C)C(C=C1)=CC=C1C2=CC=CC=C2	Ni(COD)2	5	BINAP	C1(C2=C3C=CC=CC3=CC=C2P(C4=CC=CC=C4)C5=CC=CC=C5)=C6C=CC=CC6=CC=C1P(C7=CC=CC=C7)C8=CC=CC=C8	5	NMeCy2	dioxane	100	20	42
CO049	Table 1	4	O=S(OC(C=C1)=CC=C1C2=CC=CC=C2)(C(F)(F)F)=O	C=COCCCC	O=C(C)C(C=C1)=CC=C1C2=CC=CC=C2	Ni(COD)2	5	dppf	C1=CC=C(C=C1)P([C-]2C=CC=C2)C3=CC=CC=C3.C1=CC=C(C=C1)P([C-]2C=CC=C2)C3=CC=CC=C3.[Fe+2]	5	NMeCy2	dioxane	100	20	100
CO049	Table 1	5	O=S(OC(C=C1)=CC=C1C2=CC=CC=C2)(C(F)(F)F)=O	C=COCCCC	O=C(C)C(C=C1)=CC=C1C2=CC=CC=C2	Ni(COD)2	5	dppf	C1=CC=C(C=C1)P([C-]2C=CC=C2)C3=CC=CC=C3.C1=CC=C(C=C1)P([C-]2C=CC=C2)C3=CC=CC=C3.[Fe+2]	5	NMeCy2	toluene	100	20	66
CO049	Table 1	6	O=S(OC(C=C1)=CC=C1C2=CC=CC=C2)(C(F)(F)F)=O	C=COCCCC	O=C(C)C(C=C1)=CC=C1C2=CC=CC=C2	Ni(COD)2	5	dppf	C1=CC=C(C=C1)P([C-]2C=CC=C2)C3=CC=CC=C3.C1=CC=C(C=C1)P([C-]2C=CC=C2)C3=CC=CC=C3.[Fe+2]	5	NMeCy2	THF	100	20	80
CO049	Table 1	7	O=S(OC(C=C1)=CC=C1C2=CC=CC=C2)(C(F)(F)F)=O	C=COCCCC	O=C(C)C(C=C1)=CC=C1C2=CC=CC=C2	Ni(COD)2	5	dppf	C1=CC=C(C=C1)P([C-]2C=CC=C2)C3=CC=CC=C3.C1=CC=C(C=C1)P([C-]2C=CC=C2)C3=CC=CC=C3.[Fe+2]	5	NMeCy2	diglyme	100	20	100
CO049	Table 1	14	O=S(OC(C=C1)=CC=C1C2=CC=CC=C2)(C(F)(F)F)=O	C=COCCCC	O=C(C)C(C=C1)=CC=C1C2=CC=CC=C2	Ni(COD)2	5	dppf	C1=CC=C(C=C1)P([C-]2C=CC=C2)C3=CC=CC=C3.C1=CC=C(C=C1)P([C-]2C=CC=C2)C3=CC=CC=C3.[Fe+2]	5	DIPEA	dioxane	100	20	76
CO049	Table 1	15	O=S(OC(C=C1)=CC=C1C2=CC=CC=C2)(C(F)(F)F)=O	C=COCCCC	O=C(C)C(C=C1)=CC=C1C2=CC=CC=C2	Ni(COD)2	5	dppf	C1=CC=C(C=C1)P([C-]2C=CC=C2)C3=CC=CC=C3.C1=CC=C(C=C1)P([C-]2C=CC=C2)C3=CC=CC=C3.[Fe+2]	5	NEt3	dioxane	100	20	69
CO050	Scheme 2	2	CC(C)(C)C(OC1=CC2=CC=CC=C2C=C1)=O	C12=CC=CC=C1OC=N2	C12=CC=CC=C1OC(C3=CC=C(C=CC=C4)C4=C3)=N2	Ni(COD)2	10	dcype	P(CCP(C1CCCCC1)C2CCCCC2)(C3CCCCC3)C4CCCCC4	20	Cs2CO3	dioxane	120	12	95
CO050	Scheme 3	4	O=C(OC1=CC2=CC=CC=C2C=C1)N(C)C	C12=CC=CC=C1OC=N2	C12=CC=CC=C1OC(C3=CC=C(C=CC=C4)C4=C3)=N2	Ni(COD)2	10	dcype	P(CCP(C1CCCCC1)C2CCCCC2)(C3CCCCC3)C4CCCCC4	20	Cs2CO3	dioxane	120	12	90
CO050	Scheme 3	4	O=C(OC1=CC2=CC=CC=C2C=C1)OC(C)(C)C	C12=CC=CC=C1OC=N2	C12=CC=CC=C1OC(C3=CC=C(C=CC=C4)C4=C3)=N2	Ni(COD)2	10	dcype	P(CCP(C1CCCCC1)C2CCCCC2)(C3CCCCC3)C4CCCCC4	20	Cs2CO3	dioxane	120	12	80
CO050	Scheme 3	4	O=S(OC1=CC2=CC=CC=C2C=C1)(N(C)C)=O	C12=CC=CC=C1OC=N2	C12=CC=CC=C1OC(C3=CC=C(C=CC=C4)C4=C3)=N2	Ni(COD)2	10	dcype	P(CCP(C1CCCCC1)C2CCCCC2)(C3CCCCC3)C4CCCCC4	20	Cs2CO3	dioxane	120	12	82
CO050	Scheme 3	4	O=S(OC1=CC2=CC=CC=C2C=C1)(C(F)(F)F)=O	C12=CC=CC=C1OC=N2	C12=CC=CC=C1OC(C3=CC=C(C=CC=C4)C4=C3)=N2	Ni(COD)2	10	dcype	P(CCP(C1CCCCC1)C2CCCCC2)(C3CCCCC3)C4CCCCC4	20	Cs2CO3	dioxane	120	12	99
CO050	Scheme 3	4	CC1=CC=C(S(OC2=CC3=CC=CC=C3C=C2)(=O)=O)C=C1	C12=CC=CC=C1OC=N2	C12=CC=CC=C1OC(C3=CC=C(C=CC=C4)C4=C3)=N2	Ni(COD)2	10	dcype	P(CCP(C1CCCCC1)C2CCCCC2)(C3CCCCC3)C4CCCCC4	20	Cs2CO3	dioxane	120	12	79
CO050	Scheme 3	4	CS(OC1=CC2=CC=CC=C2C=C1)(=O)=O	C12=CC=CC=C1OC=N2	C12=CC=CC=C1OC(C3=CC=C(C=CC=C4)C4=C3)=N2	Ni(COD)2	10	dcype	P(CCP(C1CCCCC1)C2CCCCC2)(C3CCCCC3)C4CCCCC4	20	Cs2CO3	dioxane	120	12	89
CO050	Table S1	10	CC(C)(C)C(OC1=CC2=CC=CC=C2C=C1)=O	C12=CC=CC=C1OC=N2	C12=CC=CC=C1OC(C3=CC=C(C=CC=C4)C4=C3)=N2	Ni(COD)2	10	dcype	P(CCP(C1CCCCC1)C2CCCCC2)(C3CCCCC3)C4CCCCC4	20	Cs2CO3	toluene	120	12	92
CO050	Table S1	11	CC(C)(C)C(OC1=CC2=CC=CC=C2C=C1)=O	C12=CC=CC=C1OC=N2	C12=CC=CC=C1OC(C3=CC=C(C=CC=C4)C4=C3)=N2	Ni(COD)2	10	dcype	P(CCP(C1CCCCC1)C2CCCCC2)(C3CCCCC3)C4CCCCC4	20	Cs2CO3	DMF	120	12	92
CO050	Table S1	12	CC(C)(C)C(OC1=CC2=CC=CC=C2C=C1)=O	C12=CC=CC=C1OC=N2	C12=CC=CC=C1OC(C3=CC=C(C=CC=C4)C4=C3)=N2	Ni(COD)2	10	dcype	P(CCP(C1CCCCC1)C2CCCCC2)(C3CCCCC3)C4CCCCC4	20	Cs2CO3	DMAc	120	12	67
CO050	Table S1	13	CC(C)(C)C(OC1=CC2=CC=CC=C2C=C1)=O	C12=CC=CC=C1OC=N2	C12=CC=CC=C1OC(C3=CC=C(C=CC=C4)C4=C3)=N2	Ni(COD)2	10	dcype	P(CCP(C1CCCCC1)C2CCCCC2)(C3CCCCC3)C4CCCCC4	20	Cs2CO3	dioxane	120	12	99
CO050	Table S1	15	CC(C)(C)C(OC1=CC2=CC=CC=C2C=C1)=O	C12=CC=CC=C1OC=N2	C12=CC=CC=C1OC(C3=CC=C(C=CC=C4)C4=C3)=N2	Ni(COD)2	10	dcype	P(CCP(C1CCCCC1)C2CCCCC2)(C3CCCCC3)C4CCCCC4	20	K3PO4	dioxane	120	12	79
CO050	Table S1	16	CC(C)(C)C(OC1=CC2=CC=CC=C2C=C1)=O	C12=CC=CC=C1OC=N2	C12=CC=CC=C1OC(C3=CC=C(C=CC=C4)C4=C3)=N2	Ni(COD)2	10	dcype	P(CCP(C1CCCCC1)C2CCCCC2)(C3CCCCC3)C4CCCCC4	20	LiOtBu	dioxane	120	12	59
CO050	Table S1	17	CC(C)(C)C(OC1=CC2=CC=CC=C2C=C1)=O	C12=CC=CC=C1OC=N2	C12=CC=CC=C1OC(C3=CC=C(C=CC=C4)C4=C3)=N2	Ni(COD)2	10	dcype	P(CCP(C1CCCCC1)C2CCCCC2)(C3CCCCC3)C4CCCCC4	20	Cs2CO3	dioxane	90	12	80
CO050	Table S1	18	CC(C)(C)C(OC1=CC2=CC=CC=C2C=C1)=O	C12=CC=CC=C1OC=N2	C12=CC=CC=C1OC(C3=CC=C(C=CC=C4)C4=C3)=N2	Ni(COD)2	10	dcype	P(CCP(C1CCCCC1)C2CCCCC2)(C3CCCCC3)C4CCCCC4	20	Cs2CO3	dioxane	100	12	99
CO050	Table S1	19	CC(C)(C)C(OC1=CC2=CC=CC=C2C=C1)=O	C12=CC=CC=C1OC=N2	C12=CC=CC=C1OC(C3=CC=C(C=CC=C4)C4=C3)=N2	Ni(COD)2	10	dcype	P(CCP(C1CCCCC1)C2CCCCC2)(C3CCCCC3)C4CCCCC4	20	Cs2CO3	dioxane	120	12	96
CO050	Table S1	20	CC(C)(C)C(OC1=CC2=CC=CC=C2C=C1)=O	C12=CC=CC=C1OC=N2	C12=CC=CC=C1OC(C3=CC=C(C=CC=C4)C4=C3)=N2	Ni(COD)2	10	dcype	P(CCP(C1CCCCC1)C2CCCCC2)(C3CCCCC3)C4CCCCC4	20	Cs2CO3	dioxane	140	12	96
CO050	Table S1	21	CC(C)(C)C(OC1=CC2=CC=CC=C2C=C1)=O	C12=CC=CC=C1OC=N2	C12=CC=CC=C1OC(C3=CC=C(C=CC=C4)C4=C3)=N2	Ni(COD)2	10	dcype	P(CCP(C1CCCCC1)C2CCCCC2)(C3CCCCC3)C4CCCCC4	20	Cs2CO3	dioxane	150	12	93
CO051	Table 1	4	O=C(OC1=CC=C(OC)C=C1)OC(CCCC)C#C[Si](C)(C)C	I[Zn]C1=CC=CC=C1	C[Si](C)(C#CC(C1=CC=CC=C1)CCCC)C	NiCl2(PCy3)2	10	L*	[H][C@@]1(C2)[C@](N=C(C3=NC(C4=N[C@](C(C=CC=C5)=C5C6)([H])[C@]6([H])O4)=CC=C3)O1)([H])C7=C2C=CC=C7	13	N/A	DME/THF	25	Unknown	53
CO051	Table 1	5	O=C(OC1=CC=C(OC)C=C1OC)OC(CCCC)C#C[Si](C)(C)C	I[Zn]C1=CC=CC=C1	C[Si](C)(C#CC(C1=CC=CC=C1)CCCC)C	NiCl2(PCy3)2	10	L*	[H][C@@]1(C2)[C@](N=C(C3=NC(C4=N[C@](C(C=CC=C5)=C5C6)([H])[C@]6([H])O4)=CC=C3)O1)([H])C7=C2C=CC=C7	13	N/A	DME/THF	25	Unknown	56
CO051	Table 1	6	O=C(OC1=C(OC)C=C(OC)C=C1OC)OC(CCCC)C#C[Si](C)(C)C	I[Zn]C1=CC=CC=C1	C[Si](C)(C#CC(C1=CC=CC=C1)CCCC)C	NiCl2(PCy3)2	10	L*	[H][C@@]1(C2)[C@](N=C(C3=NC(C4=N[C@](C(C=CC=C5)=C5C6)([H])[C@]6([H])O4)=CC=C3)O1)([H])C7=C2C=CC=C7	13	N/A	DME/THF	25	Unknown	83
CO052	Table S1	2	OCC1=CC2=CC=CC=C2C=C1	Br[Mg]C1=CC=CC=C1	C12=CC=CC=C1C=C(CC3=CC=CC=C3)C=C2	NiCl2	10	PCy3	P(C1CCCCC1)(C2CCCCC2)C3CCCCC3	40	MeMgBr	toluene/Bu2O	60	24	74
CO052	Table S1	3	OCC1=CC2=CC=CC=C2C=C1	Br[Mg]C1=CC=CC=C1	C12=CC=CC=C1C=C(CC3=CC=CC=C3)C=C2	NiBr2	10	PCy3	P(C1CCCCC1)(C2CCCCC2)C3CCCCC3	40	MeMgBr	toluene/Bu2O	60	24	71
CO052	Table S1	4	OCC1=CC2=CC=CC=C2C=C1	Br[Mg]C1=CC=CC=C1	C12=CC=CC=C1C=C(CC3=CC=CC=C3)C=C2	Ni(acac)2	10	PCy3	P(C1CCCCC1)(C2CCCCC2)C3CCCCC3	40	MeMgBr	toluene/Bu2O	60	24	68
CO052	Table S1	5	OCC1=CC2=CC=CC=C2C=C1	Br[Mg]C1=CC=CC=C1	C12=CC=CC=C1C=C(CC3=CC=CC=C3)C=C2	NiCl2(PCy3)2	10	PCy3	P(C1CCCCC1)(C2CCCCC2)C3CCCCC3	20	MeMgBr	toluene/Bu2O	60	24	77
CO052	Table S1	6	OCC1=CC2=CC=CC=C2C=C1	Br[Mg]C1=CC=CC=C1	C12=CC=CC=C1C=C(CC3=CC=CC=C3)C=C2	NiCl2(PCy3)2	5	PCy3	P(C1CCCCC1)(C2CCCCC2)C3CCCCC3	10	MeMgBr	toluene/Bu2O	60	24	72
CO052	Table S1	11	OCC1=CC2=CC=CC=C2C=C1	Br[Mg]C1=CC=CC=C1	C12=CC=CC=C1C=C(CC3=CC=CC=C3)C=C2	NiCl2(PCy3)2	10	IPr	CC(C)C(C=CC=C1C(C)C)=C1N2[C]N(C3=C(C(C)C)C=CC=C3C(C)C)C=C2	20	MeMgBr	toluene/Bu2O	60	24	72
CO052	Table S1	12	OCC1=CC2=CC=CC=C2C=C1	Br[Mg]C1=CC=CC=C1	C12=CC=CC=C1C=C(CC3=CC=CC=C3)C=C2	NiCl2(PCy3)2	10	dppe	P(CCP(C1=CC=CC=C1)C2=CC=CC=C2)(C3=CC=CC=C3)C4=CC=CC=C4	10	MeMgBr	toluene/Bu2O	60	24	50
CO052	Table S1	13	OCC1=CC2=CC=CC=C2C=C1	Br[Mg]C1=CC=CC=C1	C12=CC=CC=C1C=C(CC3=CC=CC=C3)C=C2	NiCl2(PCy3)2	10	dcype	P(CCP(C1CCCCC1)C2CCCCC2)(C3CCCCC3)C4CCCCC4	10	MeMgBr	toluene/Bu2O	60	24	45
CO052	Table S1	14	OCC1=CC2=CC=CC=C2C=C1	Br[Mg]C1=CC=CC=C1	C12=CC=CC=C1C=C(CC3=CC=CC=C3)C=C2	NiCl2(PCy3)2	10	PCy3	P(C1CCCCC1)(C2CCCCC2)C3CCCCC3	20	MeMgBr	toluene/Bu2O	30	24	72
CO052	Table S1	15	OCC1=CC2=CC=CC=C2C=C1	Br[Mg]C1=CC=CC=C1	C12=CC=CC=C1C=C(CC3=CC=CC=C3)C=C2	NiCl2(PCy3)2	10	PCy3	P(C1CCCCC1)(C2CCCCC2)C3CCCCC3	20	MeMgBr	toluene	60	24	56
CO052	Table S1	16	OCC1=CC2=CC=CC=C2C=C1	Br[Mg]C1=CC=CC=C1	C12=CC=CC=C1C=C(CC3=CC=CC=C3)C=C2	NiCl2(PCy3)2	10	PCy3	P(C1CCCCC1)(C2CCCCC2)C3CCCCC3	20	MeMgBr	Bu2O	60	24	67
CO052	Table S1	17	OCC1=CC2=CC=CC=C2C=C1	Cl[Mg]C1=CC=CC=C1	C12=CC=CC=C1C=C(CC3=CC=CC=C3)C=C2	NiCl2(PCy3)2	10	PCy3	P(C1CCCCC1)(C2CCCCC2)C3CCCCC3	20	MeMgBr	toluene/Bu2O	60	24	93
CO053	Table 1	1	CC(OC(OC(C)(C)C)=O)C1=CC2=CC=CC=C2C=C1	CC1=CC=C(B2OCC(C)(C)CO2)C=C1	CC(C1=CC=C(OC)C=C1)C2=CC3=CC=CC=C3C=C2	Ni(COD)2	10	PCy3	P(C1CCCCC1)(C2CCCCC2)C3CCCCC3	20	KOtBu	toluene	25	20	46
CO053	Table 1	2	CC(OC(OC(C)(C)C)=O)C1=CC2=CC=CC=C2C=C1	CC1=CC=C(B2OCC(C)(C)CO2)C=C1	CC(C1=CC=C(OC)C=C1)C2=CC3=CC=CC=C3C=C2	Ni(COD)2	10	PCy3	P(C1CCCCC1)(C2CCCCC2)C3CCCCC3	20	KOtBu	THF	25	20	53
CO053	Table 1	3	CC(OC(OC(C)(C)C)=O)C1=CC2=CC=CC=C2C=C1	CC1=CC=C(B2OCC(C)(C)CO2)C=C1	CC(C1=CC=C(OC)C=C1)C2=CC3=CC=CC=C3C=C2	Ni(COD)2	10	PCy3	P(C1CCCCC1)(C2CCCCC2)C3CCCCC3	20	KOtBu	THF	25	20	73
CO053	Table 1	4	CC(OC(OC(C)(C)C)=O)C1=CC2=CC=CC=C2C=C1	CC1=CC=C(B2OCC(C)(C)CO2)C=C1	CC(C1=CC=C(OC)C=C1)C2=CC3=CC=CC=C3C=C2	Ni(COD)2	10	PCy3	P(C1CCCCC1)(C2CCCCC2)C3CCCCC3	20	KOtBu	THF	25	20	76
CO053	Table 1	5	CC(OC(OC(C)(C)C)=O)C1=CC2=CC=CC=C2C=C1	CC1=CC=C(B2OCC(C)(C)CO2)C=C1	CC(C1=CC=C(OC)C=C1)C2=CC3=CC=CC=C3C=C2	Ni(COD)2	10	PCy3	P(C1CCCCC1)(C2CCCCC2)C3CCCCC3	20	KOtBu	THF	25	20	46
CO053	Table 1	6	CC(OC(OC(C)(C)C)=O)C1=CC2=CC=CC=C2C=C1	CC1=CC=C(B2OCC(C)(C)CO2)C=C1	CC(C1=CC=C(OC)C=C1)C2=CC3=CC=CC=C3C=C2	Ni(COD)2	10	PCy3	P(C1CCCCC1)(C2CCCCC2)C3CCCCC3	20	KOtBu	THF	25	20	55
CO053	Table 1	8	CC(OC(C(C)(C)C)=O)C1=CC2=CC=CC=C2C=C1	CC1=CC=C(B2OCC(C)(C)CO2)C=C1	CC(C1=CC=C(OC)C=C1)C2=CC3=CC=CC=C3C=C2	Ni(COD)2	10	PCy3	P(C1CCCCC1)(C2CCCCC2)C3CCCCC3	20	KOtBu	THF	25	20	53
CO053	Table 1	9	CC(OC(C(C)(C)C)=O)C1=CC2=CC=CC=C2C=C1	CC1=CC=C(B2OCC(C)(C)CO2)C=C1	CC(C1=CC=C(OC)C=C1)C2=CC3=CC=CC=C3C=C2	Ni(COD)2	10	SIMes	CC1=C(C(C)=CC(C)=C1)N2CCN([C]2)C3=C(C=C(C=C3C)C)C	11	KOtBu	THF	25	20	60
CO053	Table 1	10	O=C(C1=CC=CC=C1)OC(C2=CC3=CC=CC=C3C=C2)C4=CC=CC=C3	CC1=CC=C(B2OCC(C)(C)CO2)C=C1	CC(C1=CC=C(OC)C=C1)C2=CC3=CC=CC=C3C=C2	Ni(COD)2	10	PCy3	P(C1CCCCC1)(C2CCCCC2)C3CCCCC3	20	KOtBu	THF	25	20	57
CO053	Table 1	11	O=C(C1=CC=CC=C1)OC(C2=CC3=CC=CC=C3C=C2)C4=CC=CC=C4	CC1=CC=C(B2OCC(C)(C)CO2)C=C1	CC(C1=CC=C(OC)C=C1)C2=CC3=CC=CC=C3C=C2	Ni(COD)2	10	SIMes	CC1=C(C(C)=CC(C)=C1)N2CCN([C]2)C3=C(C=C(C=C3C)C)C	11	KOtBu	THF	25	20	83
CO053	Table 1	12	CC(OC(N1CCCC1)=O)C2=CC3=CC=CC=C3C=C2	CC1=CC=C(B2OCC(C)(C)CO2)C=C1	CC(C1=CC=C(OC)C=C1)C2=CC3=CC=CC=C3C=C2	Ni(COD)2	10	PCy3	P(C1CCCCC1)(C2CCCCC2)C3CCCCC3	20	KOtBu	THF	25	20	62
CO053	Table 1	13	CC(OC(N1CCCC1)=O)C2=CC3=CC=CC=C3C=C2	CC1=CC=C(B2OCC(C)(C)CO2)C=C1	CC(C1=CC=C(OC)C=C1)C2=CC3=CC=CC=C3C=C2	Ni(COD)2	10	PCy3	P(C1CCCCC1)(C2CCCCC2)C3CCCCC3	20	KOtBu	toluene/THF	25	20	67
CO053	Table 1	14	CC(OC(N1CCCC1)=O)C2=CC3=CC=CC=C3C=C2	CC1=CC=C(B2OCC(C)(C)CO2)C=C1	CC(C1=CC=C(OC)C=C1)C2=CC3=CC=CC=C3C=C2	Ni(COD)2	10	SIMes	CC1=C(C(C)=CC(C)=C1)N2CCN([C]2)C3=C(C=C(C=C3C)C)C	11	KOtBu	toluene/THF	25	20	82
CO053	Table 1	15	CC(OC(N1CCCC1)=O)C2=CC3=CC=CC=C3C=C2	CC1=CC=C(B2OCC(C)(C)CO2)C=C1	CC(C1=CC=C(OC)C=C1)C2=CC3=CC=CC=C3C=C2	Ni(COD)2	10	PCy3	P(C1CCCCC1)(C2CCCCC2)C3CCCCC3	20	KOtBu	toluene/THF	25	20	88
CO053	Table 1	16	CC(OC(N1CCCC1)=O)C2=CC3=CC=CC=C3C=C2	CC1=CC=C(B2OCC(C)(C)CO2)C=C1	CC(C1=CC=C(OC)C=C1)C2=CC3=CC=CC=C3C=C2	Ni(COD)2	10	SIMes	CC1=C(C(C)=CC(C)=C1)N2CCN([C]2)C3=C(C=C(C=C3C)C)C	11	KOtBu	toluene/THF	25	20	84
CO054	Table SI 1	7	CCC(OCC1=CC=CC=N1)C2=CC3=CC=CC=C3C=C2	C[Zn]C	CCC(C)C1=CC2=CC=CC=C2C=C1	NiCl2•DME	10	BINAP	C1(C2=C3C=CC=CC3=CC=C2P(C4=CC=CC=C4)C5=CC=CC=C5)=C6C=CC=CC6=CC=C1P(C7=CC=CC=C7)C8=CC=CC=C8	20	N/A	toluene	25	24	51
CO054	Table SI 1	9	CCC(OCC(O)=O)C1=CC2=CC=CC=C2C=C1	C[Zn]C	CCC(C)C1=CC2=CC=CC=C2C=C1	NiCl2•DME	10	BINAP	C1(C2=C3C=CC=CC3=CC=C2P(C4=CC=CC=C4)C5=CC=CC=C5)=C6C=CC=CC6=CC=C1P(C7=CC=CC=C7)C8=CC=CC=C8	20	N/A	toluene	25	24	70
CO054	Table SI 1	11	CCC(OC(C(C)(O)C)=O)C1=CC2=CC=CC=C2C=C1	C[Zn]C	CCC(C)C1=CC2=CC=CC=C2C=C1	Ni(acac)2	10	DPEPhos	C1(P(C2=CC=CC=C2)C3=CC=CC=C3)=CC=CC=C1OC4=CC=CC=C4P(C5=CC=CC=C5)C6=CC=CC=C6	20	N/A	THF	25	24	59
CO054	Table SI 1	12	CCC(OC(C(C)(S)C)=O)C1=CC2=CC=CC=C2C=C1	C[Zn]C	CCC(C)C1=CC2=CC=CC=C2C=C1	NiCl2•DME	10	DPEPhos	C1(P(C2=CC=CC=C2)C3=CC=CC=C3)=CC=CC=C1OC4=CC=CC=C4P(C5=CC=CC=C5)C6=CC=CC=C6	20	N/A	Et2O	25	24	67
CO054	Table SI 1	13	CCC(OC(CO)=O)C1=CC2=CC=CC=C2C=C1	C[Zn]C	CCC(C)C1=CC2=CC=CC=C2C=C1	NiCl2•DME	10	DPEPhos	C1(P(C2=CC=CC=C2)C3=CC=CC=C3)=CC=CC=C1OC4=CC=CC=C4P(C5=CC=CC=C5)C6=CC=CC=C6	20	N/A	toluene	25	24	71
CO054	Table SI 1	14	CCC(OC(CS)=O)C1=CC2=CC=CC=C2C=C1	C[Zn]C	CCC(C)C1=CC2=CC=CC=C2C=C1	NiCl2•DME	10	DPEPhos	C1(P(C2=CC=CC=C2)C3=CC=CC=C3)=CC=CC=C1OC4=CC=CC=C4P(C5=CC=CC=C5)C6=CC=CC=C6	20	N/A	THF	25	24	62
CO054	Table SI 1	15	CCC(OC(CSC)=O)C1=CC2=CC=CC=C2C=C1	C[Zn]C	CCC(C)C1=CC2=CC=CC=C2C=C1	NiCl2•DME	10	DPEPhos	C1(P(C2=CC=CC=C2)C3=CC=CC=C3)=CC=CC=C1OC4=CC=CC=C4P(C5=CC=CC=C5)C6=CC=CC=C6	20	N/A	toluene	25	24	81
CO054	Table SI 1	16	CCC(OC(C)=O)C1=CC2=CC=CC=C2C=C1	C[Zn]C	CCC(C)C1=CC2=CC=CC=C2C=C1	NiCl2•DME	10	DPEPhos	C1(P(C2=CC=CC=C2)C3=CC=CC=C3)=CC=CC=C1OC4=CC=CC=C4P(C5=CC=CC=C5)C6=CC=CC=C6	20	N/A	toluene	25	24	84
CO054	Table SI 1	17	CCC(OC(C)=O)C1=CC2=CC=CC=C2C=C1	C[Zn]C	CCC(C)C1=CC2=CC=CC=C2C=C1	NiCl2•DME	10	Xantphos	CC1(C)C2=C(OC3=C1C=CC=C3P(C4=CC=CC=C4)C5=CC=CC=C5)C(P(C6=CC=CC=C6)C7=CC=CC=C7)=CC=C2	20	N/A	toluene	25	24	45
CO054	Table SI 1	19	CCC(OC(C(C)(C)C)=O)C1=CC2=CC=CC=C2C=C1	C[Zn]C	CCC(C)C1=CC2=CC=CC=C2C=C1	NiCl2•DME	10	DPEPhos	C1(P(C2=CC=CC=C2)C3=CC=CC=C3)=CC=CC=C1OC4=CC=CC=C4P(C5=CC=CC=C5)C6=CC=CC=C6	20	N/A	toluene	25	24	79
CO054	Table SI 1	20	CCC(OC(C(C)(C)C)=O)C1=CC2=CC=CC=C2C=C1	C[Zn]C	CCC(C)C1=CC2=CC=CC=C2C=C1	NiCl2•DME	10	Xantphos	CC1(C)C2=C(OC3=C1C=CC=C3P(C4=CC=CC=C4)C5=CC=CC=C5)C(P(C6=CC=CC=C6)C7=CC=CC=C7)=CC=C2	20	N/A	toluene	25	24	62
CO055	Table 1	1	OC(CC)C1=CC=CC=C1	COC1=CC=C([Zn]I)C=C1	CCC(C1=CC=C(OC)C=C1)C2=CC=CC=C2	NiBr2•diglyme	9	L	COC[C@H]1[C@H](C2=CC=CC=C2)OC(C3=N[C@@H](COC)[C@H](C4=CC=CC=C4)O3)=N1	13	N/A	DCM/THF	-45	Unknown	93
CO055	Table 1	6	OC(CC)C1=CC=CC=C1	COC1=CC=C([Zn]I)C=C1	CCC(C1=CC=C(OC)C=C1)C2=CC=CC=C2	NiBr2•diglyme	9	3	[C@H]1(CC2=CC=CC=C2)COC(C3=N[C@@H](CC4=CC=CC=C4)CO3)=N1	13	N/A	DCM/THF	-45	Unknown	94
CO055	Table 1	9	OC(CC)C1=CC=CC=C1	COC1=CC=C([Zn]I)C=C1	CCC(C1=CC=C(OC)C=C1)C2=CC=CC=C2	NiBr2•diglyme	9	L	COC[C@H]1[C@H](C2=CC=CC=C2)OC(C3=N[C@@H](COC)[C@H](C4=CC=CC=C4)O3)=N1	13	N/A	DCM/THF	-45	Unknown	51
CO055	Table 1	10	OC(CC)C1=CC=CC=C1	COC1=CC=C([Zn]I)C=C1	CCC(C1=CC=C(OC)C=C1)C2=CC=CC=C2	NiBr2•diglyme	9	L	COC[C@H]1[C@H](C2=CC=CC=C2)OC(C3=N[C@@H](COC)[C@H](C4=CC=CC=C4)O3)=N1	13	N/A	DCM/THF	-45	Unknown	51
CO055	Table 1	11	OC(CC)C1=CC=CC=C1	COC1=CC=C([Zn]I)C=C1	CCC(C1=CC=C(OC)C=C1)C2=CC=CC=C2	NiBr2•diglyme	9	L	COC[C@H]1[C@H](C2=CC=CC=C2)OC(C3=N[C@@H](COC)[C@H](C4=CC=CC=C4)O3)=N1	13	N/A	DCM/THF	0	Unknown	61
CO056	Table 1	3	C=CCCCC(OC)C1=CC2=CC=CC=C2C=C1	N/A	C=C1CCCC1C2=CC3=CC=CC=C3C=C2	Ni(COD)2	10	PCy3	P(C1CCCCC1)(C2CCCCC2)C3CCCCC3	15	MeMgI	toluene	25	18	64
CO056	Table 1	7	C=CCCCC(OC)C1=CC2=CC=CC=C2C=C1	N/A	C=C1CCCC1C2=CC3=CC=CC=C3C=C2	NiCl2(PCy3)2	10	PCy3	P(C1CCCCC1)(C2CCCCC2)C3CCCCC3	20	MeMgI	toluene	25	18	82
CO057	Scheme 2	N/A	C12=CC=CC=C1C=C(C3CCCCO3)C=C2	C[Mg]I	CC(CCCCO)C1=CC2=CC=CC=C2C=C1	Ni(COD)2	10	BINAP	C1(C2=C3C=CC=CC3=CC=C2P(C4=CC=CC=C4)C5=CC=CC=C5)=C6C=CC=CC6=CC=C1P(C7=CC=CC=C7)C8=CC=CC=C8	10	N/A	toluene	25	24	86
CO057	Scheme 3	N/A	CC(CO1)CC1C2=CC3=CC=CC=C3O2	C[Mg]I	OCC(C)CC(C)C1=CC2=CC=CC=C2O1	Ni(COD)2	10	DPEPhos	C1(P(C2=CC=CC=C2)C3=CC=CC=C3)=CC=CC=C1OC4=CC=CC=C4P(C5=CC=CC=C5)C6=CC=CC=C6	10	N/A	toluene	25	24	93
CO057	Table 5	1	O=C(O1)CCCC1C2=CC3=CC=CC=C3C=C2	C[Zn]C	CC(CCCC(O)=O)C1=CC2=CC=CC=C2C=C1	Ni(acac)2	10	Xantphos	CC1(C)C2=C(OC3=C1C=CC=C3P(C4=CC=CC=C4)C5=CC=CC=C5)C(P(C6=CC=CC=C6)C7=CC=CC=C7)=CC=C2	20	N/A	toluene	25	24	89
CO058	Table 1	5	COCC1=CC2=CC=CC=C2C=C1	C[Mg]Br	CCC1=CC2=CC=CC=C2C=C1	NiCl2(dppf)	5	dppf	C1=CC=C(C=C1)P([C-]2C=CC=C2)C3=CC=CC=C3.C1=CC=C(C=C1)P([C-]2C=CC=C2)C3=CC=CC=C3.[Fe+2]	5	N/A	toluene	25	Unknown	92
CO058	Table 1	6	COCC1=CC2=CC=CC=C2C=C1	C[Mg]Br	CCC1=CC2=CC=CC=C2C=C1	NiCl2(dppf)	2	dppf	C1=CC=C(C=C1)P([C-]2C=CC=C2)C3=CC=CC=C3.C1=CC=C(C=C1)P([C-]2C=CC=C2)C3=CC=CC=C3.[Fe+2]	2	N/A	toluene	25	Unknown	99
CO058	Table 1	7	COCC1=CC2=CC=CC=C2C=C1	C[Mg]Br	CCC1=CC2=CC=CC=C2C=C1	NiCl2(dppp)	5	dppp	P(CCCP(C1=CC=CC=C1)C2=CC=CC=C2)(C3=CC=CC=C3)C4=CC=CC=C4	5	N/A	toluene	25	Unknown	97
CO058	Table 1	9	COCC1=CC2=CC=CC=C2C=C1	C[Mg]Br	CCC1=CC2=CC=CC=C2C=C1	Ni(acac)2	5	dppb	P(CCCCP(C1=CC=CC=C1)C2=CC=CC=C2)(C3=CC=CC=C3)C4=CC=CC=C4	5	N/A	toluene	25	Unknown	99
CO058	Table 1	10	COCC1=CC2=CC=CC=C2C=C1	C[Mg]Br	CCC1=CC2=CC=CC=C2C=C1	Ni(acac)2	5	dppf	C1=CC=C(C=C1)P([C-]2C=CC=C2)C3=CC=CC=C3.C1=CC=C(C=C1)P([C-]2C=CC=C2)C3=CC=CC=C3.[Fe+2]	5	N/A	toluene	25	Unknown	97
CO058	Table 1	11	COCC1=CC2=CC=CC=C2C=C1	C[Mg]Br	CCC1=CC2=CC=CC=C2C=C1	NiCl2	5	dppf	C1=CC=C(C=C1)P([C-]2C=CC=C2)C3=CC=CC=C3.C1=CC=C(C=C1)P([C-]2C=CC=C2)C3=CC=CC=C3.[Fe+2]	5	N/A	toluene	25	Unknown	79
CO058	Table 1	19	COCC1=CC2=CC=CC=C2C=C1	C[Mg]Br	CCC1=CC2=CC=CC=C2C=C1	NiCl2(dppf)	5	dppf	C1=CC=C(C=C1)P([C-]2C=CC=C2)C3=CC=CC=C3.C1=CC=C(C=C1)P([C-]2C=CC=C2)C3=CC=CC=C3.[Fe+2]	5	N/A	Et2O	25	Unknown	99
CO059	Table 1	5	O=C(OC1=CC2=CC=CC=C2C=C1)C	B1(C2=CC=CC=C2)OB(C3=CC=CC=C3)OB(C4=CC=CC=C4)O1	C12=CC=CC=C1C=C(C3=CC=CC=C3)C=C2	NiCl2(PCy3)2	10	PCy3	P(C1CCCCC1)(C2CCCCC2)C3CCCCC3	20	K3PO4	dioxane	110	12	73
CO059	Table 1	11	O=C(OC1=CC2=CC=CC=C2C=C1)C	B1(C2=CC=CC=C2)OB(C3=CC=CC=C3)OB(C4=CC=CC=C4)O1	C12=CC=CC=C1C=C(C3=CC=CC=C3)C=C2	NiCl2(PCy3)2	10	PCy3	P(C1CCCCC1)(C2CCCCC2)C3CCCCC3	20	K3PO4	dioxane	110	12	58
CO059	Table 1	12	O=C(OC1=CC2=CC=CC=C2C=C1)C	B1(C2=CC=CC=C2)OB(C3=CC=CC=C3)OB(C4=CC=CC=C4)O1	C12=CC=CC=C1C=C(C3=CC=CC=C3)C=C2	NiCl2(PCy3)2	10	PCy3	P(C1CCCCC1)(C2CCCCC2)C3CCCCC3	20	K3PO4	dioxane	110	12	46
CO059	Table 1	13	O=C(OC1=CC2=CC=CC=C2C=C1)C	B1(C2=CC=CC=C2)OB(C3=CC=CC=C3)OB(C4=CC=CC=C4)O1	C12=CC=CC=C1C=C(C3=CC=CC=C3)C=C2	NiCl2•6H2O	10	PCy3	P(C1CCCCC1)(C2CCCCC2)C3CCCCC3	20	K3PO4	dioxane	110	12	51
CO059	Table 1	19	O=C(OC1=CC2=CC=CC=C2C=C1)C	B1(C2=CC=CC=C2)OB(C3=CC=CC=C3)OB(C4=CC=CC=C4)O1	C12=CC=CC=C1C=C(C3=CC=CC=C3)C=C2	NiCl2(PCy3)2	10	PCy3	P(C1CCCCC1)(C2CCCCC2)C3CCCCC3	20	K3PO4	dioxane	110	12	45
CO059	Table 1	22	O=C(OC1=CC2=CC=CC=C2C=C1)C	B1(C2=CC=CC=C2)OB(C3=CC=CC=C3)OB(C4=CC=CC=C4)O1	C12=CC=CC=C1C=C(C3=CC=CC=C3)C=C2	NiCl2(PCy3)2	10	PCy3	P(C1CCCCC1)(C2CCCCC2)C3CCCCC3	20	K3PO4	dioxane	110	12	51
CO060	Table 1	1	CC(C)(C)C(OC1=CC2=CC=CC=C2C=C1)=O	COC1=CC=C(B(O)O)C=C1	COC(C=C1)=CC=C1C2=CC3=CC=CC=C3C=C2	NiCl2(PCy3)2	5	PCy3	P(C1CCCCC1)(C2CCCCC2)C3CCCCC3	10	K3PO4	toluene	80	24	92
CO061	Table 5	1	CC1=CC=C(OS(=O)(C(F)(F)F)=O)C=C1	Br[Mg]C1=CC=CC=C1	CC1=CC=C(C2=CC=CC=C2)C=C1	Ni(acac)2	1	PO ligand	CC(O)C1=C(P(C2=CC=CC=C2)C3=CC=CC=C3)C=CC=C1	1	N/A	Et2O	25	2	95
CO061	Table 5	2	CC1=CC=C(OP(OCC)(OCC)=O)C=C1	Br[Mg]C1=CC=CC=C1	CC1=CC=C(C2=CC=CC=C2)C=C1	Ni(acac)2	1	PO ligand	CC(O)C1=C(P(C2=CC=CC=C2)C3=CC=CC=C3)C=CC=C1	1	N/A	Et2O	25	2	92
CO061	Table 5	4	CC1=CC=C(OC(N(CC)CC)=O)C=C1	Br[Mg]C1=CC=CC=C1	CC1=CC=C(C2=CC=CC=C2)C=C1	Ni(acac)2	3	PO ligand	CC(O)C1=C(P(C2=CC=CC=C2)C3=CC=CC=C3)C=CC=C1	3	N/A	Et2O	25	1	95
CO062	Table 1	1	O=C(OC1=CC=CC2=CC=CC=C21)N(CC)CC	COC1=CC=C(B(O)O)C=C1	COC(C=C1)=CC=C1C2=CC=CC3=CC=CC=C32	NiCl2(PCy3)2	10	PCy3	P(C1CCCCC1)(C2CCCCC2)C3CCCCC3	20	K3PO4	toluene	130	24	86
CO062	Table 2	1	O=S(OC1=CC=CC2=CC=CC=C21)(N(C)C)=O	COC1=CC=C(B(O)O)C=C1	COC(C=C1)=CC=C1C2=CC=CC3=CC=CC=C32	NiCl2(PCy3)2	5	PCy3	P(C1CCCCC1)(C2CCCCC2)C3CCCCC3	10	K3PO4	toluene	110	24	95
CO063	Table 1	7	O=C(OC1=CC2=CC=CC=C2C=C1)N(CC)CC	B1(C2=CC=CC=C2)OB(C3=CC=CC=C3)OB(C4=CC=CC=C4)O1		NiCl2(PCy3)2	5	PCy3	P(C1CCCCC1)(C2CCCCC2)C3CCCCC3	20	K3PO4	o-xylene	150	5	61
CO063	Table 1	8	O=C(OC1=CC2=CC=CC=C2C=C1)N(CC)CC	B1(C2=CC=CC=C2)OB(C3=CC=CC=C3)OB(C4=CC=CC=C4)O1		NiCl2(PCy3)2	10	PCy3	P(C1CCCCC1)(C2CCCCC2)C3CCCCC3	10	K3PO4	toluene	120	20	62
CO063	Table 1	9	O=C(OC1=CC2=CC=CC=C2C=C1)N(CC)CC	B1(C2=CC=CC=C2)OB(C3=CC=CC=C3)OB(C4=CC=CC=C4)O1		Ni(COD)2	5	PCy3	P(C1CCCCC1)(C2CCCCC2)C3CCCCC3	10	K3PO4	toluene	120	20	69
CO063	Table 1	10	O=C(OC1=CC2=CC=CC=C2C=C1)N(CC)CC	B1(C2=CC=CC=C2)OB(C3=CC=CC=C3)OB(C4=CC=CC=C4)O1		NiCl2(PCy3)2	10	PCy3	P(C1CCCCC1)(C2CCCCC2)C3CCCCC3	10	K3PO4	toluene	120	20	69
CO063	Table 1	11	O=C(OC1=CC2=CC=CC=C2C=C1)N(CC)CC	B1(C2=CC=CC=C2)OB(C3=CC=CC=C3)OB(C4=CC=CC=C4)O1		NiCl2(PCy3)2	5	PCy3	P(C1CCCCC1)(C2CCCCC2)C3CCCCC3	20	K3PO4	o-xylene	150	5	84
CO064	Table 3	1	ClC1=CC=C(OS(C2=CC=C(C)C=C2)(=O)=O)C=C1	COC1=CC=C(B(O)O)C=C1	ClC1=CC=C(C2=CC=C(OC)C=C2)C=C1	Ni(COD)2	5	PMe3	CP(C)C	10	K3PO4	dioxane	80	36	54
CO064	Table 3	3	ClC1=CC=C(OS(C2=CC=C(C)C=C2)(=O)=O)C=C1	COC1=CC=C(B(O)O)C=C1	ClC1=CC=C(C2=CC=C(OC)C=C2)C=C1	Ni(COD)2	5	PMe3	CP(C)C	9	K3PO4	dioxane	80	36	62
CO064	Table 3	4	ClC1=CC=C(OS(C2=CC=C(C)C=C2)(=O)=O)C=C1	COC1=CC=C(B(O)O)C=C1	ClC1=CC=C(C2=CC=C(OC)C=C2)C=C1	Ni(COD)2	5	PMe3	CP(C)C	12	K3PO4	dioxane	80	36	55
CO064	Table 3	6	ClC1=CC=C(OS(C2=CC=C(C)C=C2)(=O)=O)C=C1	CC1(C)COB(C2=CC=C(OC)C=C2)OC1	ClC1=CC=C(C2=CC=C(OC)C=C2)C=C1	19	5	PMe3	CP(C)C	10	K3PO4	dioxane	80	36	60
CO064	Table 3	7	ClC1=CC=C(OS(C2=CC=C(C)C=C2)(=O)=O)C=C1	CC1(C)COB(C2=CC=C(OC)C=C2)OC1	ClC1=CC=C(C2=CC=C(OC)C=C2)C=C1	19	5	PMe3	CP(C)C	10	K3PO4	dioxane	80	36	72
CO064	Table 3	8	ClC1=CC=C(OS(C2=CC=C(C)C=C2)(=O)=O)C=C1	CC1(C)COB(C2=CC=C(OC)C=C2)OC1	ClC1=CC=C(C2=CC=C(OC)C=C2)C=C1	20	5	PMe3	CP(C)C	10	K3PO4	dioxane	80	36	83
CO064	Table 3	9	ClC1=CC=C(OS(C2=CC=C(C)C=C2)(=O)=O)C=C1	CC1(C)COB(C2=CC=C(OC)C=C2)OC1	ClC1=CC=C(C2=CC=C(OC)C=C2)C=C1	21	5	PMe3	CP(C)C	10	K3PO4	dioxane	80	36	57
CO064	Table 3	10	ClC1=CC=C(OS(C2=CC=C(C)C=C2)(=O)=O)C=C1	CC1(C)COB(C2=CC=C(OC)C=C2)OC1	ClC1=CC=C(C2=CC=C(OC)C=C2)C=C1	22	5	PMe3	CP(C)C	10	K3PO4	dioxane	80	36	73
CO065	Table 1	1	CC/C(C1=CC=CC=C1)=C(OS(C2=CC=C(C)C=C2)(=O)=O)\C3=CC=CC=C3	FC1=CC=C(B2OC(C)(C)C(C)(C)O2)C=C1	CC/C(C1=CC=CC=C1)=C(C2=CC=C(F)C=C2)\C3=CC=CC=C3	Ni(COD)2	5	P(F-C6H4)3	FC(C=C1)=CC=C1P(C2=CC=C(F)C=C2)C3=CC=C(F)C=C3	15	K3PO4	THF/H2O	70	16	96
CO065	Table 1	2	CC/C(C1=CC=CC=C1)=C(OS(C2=CC=C(C)C=C2)(=O)=O)\C3=CC=CC=C3	FC1=CC=C(B2OC(C)(C)C(C)(C)O2)C=C1	CC/C(C1=CC=CC=C1)=C(C2=CC=C(F)C=C2)\C3=CC=CC=C3	Ni(COD)2	5	P(F-C6H4)3	FC(C=C1)=CC=C1P(C2=CC=C(F)C=C2)C3=CC=C(F)C=C3	15	K3PO4	THF/H2O	70	16	85
CO065	Table 1	3	CC/C(C1=CC=CC=C1)=C(OS(C2=CC=C(C)C=C2)(=O)=O)\C3=CC=CC=C3	FC1=CC=C(B2OC(C)(C)C(C)(C)O2)C=C1	CC/C(C1=CC=CC=C1)=C(C2=CC=C(F)C=C2)\C3=CC=CC=C3	Ni(COD)2	5	P(F-C6H4)3	FC(C=C1)=CC=C1P(C2=CC=C(F)C=C2)C3=CC=C(F)C=C3	15	K3PO4	THF/H2O	70	16	87
CO065	Table 1	4	CC/C(C1=CC=CC=C1)=C(OS(C2=CC=C(C)C=C2)(=O)=O)\C3=CC=CC=C3	FC1=CC=C(B2OC(C)(C)C(C)(C)O2)C=C1	CC/C(C1=CC=CC=C1)=C(C2=CC=C(F)C=C2)\C3=CC=CC=C3	Ni(COD)2	5	PCy3	P(C1CCCCC1)(C2CCCCC2)C3CCCCC3	15	K3PO4	tAmOH	70	16	84
CO065	Table 1	5	CC/C(C1=CC=CC=C1)=C(OS(C2=CC=C(C)C=C2)(=O)=O)\C3=CC=CC=C3	FC1=CC=C(B2OC(C)(C)C(C)(C)O2)C=C1	CC/C(C1=CC=CC=C1)=C(C2=CC=C(F)C=C2)\C3=CC=CC=C3	Ni(COD)2	5	PCy3	P(C1CCCCC1)(C2CCCCC2)C3CCCCC3	15	K3PO4	tAmOH	70	16	93
CO065	Table 1	6	CC/C(C1=CC=CC=C1)=C(OS(C2=CC=C(C)C=C2)(=O)=O)\C3=CC=CC=C3	FC1=CC=C(B2OC(C)(C)C(C)(C)O2)C=C1	CC/C(C1=CC=CC=C1)=C(C2=CC=C(F)C=C2)\C3=CC=CC=C3	Ni(COD)2	5	PCy3	P(C1CCCCC1)(C2CCCCC2)C3CCCCC3	15	K3PO4	tAmOH	70	16	73
CO066	Table 1	1	C1(C=CC2=C3C=CC=C2)=C3C(C(C=CC=C4)=C4C=C5)=C5O1	Cl[Mg]C1=CC=CC=C1	OC(C=CC1=C2C=CC=C1)=C2C3=C(C4=CC=CC=C4)C=CC5=C3C=CC=C5	Ni(COD)2	10	L9	CC(C1=CC=CC2=C1C=CC=C2)N3[C]N(C=C3)C(C)C4=C(C=CC=C5)C5=CC=C4	12	N/A	TBME	25	36	92
CO066	Table 1	4	C1(C=CC2=C3C=CC=C2)=C3C(C(C=CC=C4)=C4C=C5)=C5O1	Cl[Mg]C1=CC=CC=C1	OC(C=CC1=C2C=CC=C1)=C2C3=C(C4=CC=CC=C4)C=CC5=C3C=CC=C5	NiCl2•DME	10	L9	CC(C1=CC=CC2=C1C=CC=C2)N3[C]N(C=C3)C(C)C4=C(C=CC=C5)C5=CC=C4	12	N/A	TBME	25	36	43
CO066	Table 1	5	C1(C=CC2=C3C=CC=C2)=C3C(C(C=CC=C4)=C4C=C5)=C5O1	Cl[Mg]C1=CC=CC=C1	OC(C=CC1=C2C=CC=C1)=C2C3=C(C4=CC=CC=C4)C=CC5=C3C=CC=C5	Ni(COD)2	10	L9	CC(C1=CC=CC2=C1C=CC=C2)N3[C]N(C=C3)C(C)C4=C(C=CC=C5)C5=CC=C4	12	N/A	toluene	25	36	80
CO066	Table 1	8	C1(C=CC2=C3C=CC=C2)=C3C(C(C=CC=C4)=C4C=C5)=C5O1	Cl[Mg]C1=CC=CC=C1	OC(C=CC1=C2C=CC=C1)=C2C3=C(C4=CC=CC=C4)C=CC5=C3C=CC=C5	Ni(COD)2	10	L9	CC(C1=CC=CC2=C1C=CC=C2)N3[C]N(C=C3)C(C)C4=C(C=CC=C5)C5=CC=C4	12	N/A	CPME	25	36	83
CO066	Table 1	9	C1(C=CC2=C3C=CC=C2)=C3C(C(C=CC=C4)=C4C=C5)=C5O1	Br[Mg]C1=CC=CC=C1	OC(C=CC1=C2C=CC=C1)=C2C3=C(C4=CC=CC=C4)C=CC5=C3C=CC=C5	Ni(COD)2	10	L9	CC(C1=CC=CC2=C1C=CC=C2)N3[C]N(C=C3)C(C)C4=C(C=CC=C5)C5=CC=C4	12	N/A	TBME	25	36	96
CO066	Table 1	10	C1(C=CC2=C3C=CC=C2)=C3C(C(C=CC=C4)=C4C=C5)=C5O1	I[Mg]C1=CC=CC=C1	OC(C=CC1=C2C=CC=C1)=C2C3=C(C4=CC=CC=C4)C=CC5=C3C=CC=C5	Ni(COD)2	10	L9	CC(C1=CC=CC2=C1C=CC=C2)N3[C]N(C=C3)C(C)C4=C(C=CC=C5)C5=CC=C4	12	N/A	TBME	25	36	100
CO066	Table 1	11	C1(C=CC2=C3C=CC=C2)=C3C(C(C=CC=C4)=C4C=C5)=C5O1	Cl[Mg]C1=CC=CC=C1	OC(C=CC1=C2C=CC=C1)=C2C3=C(C4=CC=CC=C4)C=CC5=C3C=CC=C5	Ni(COD)2	10	L9	CC(C1=CC=CC2=C1C=CC=C2)N3[C]N(C=C3)C(C)C4=C(C=CC=C5)C5=CC=C4	12	N/A	TBME	25	36	94
CO066	Table 1	12	C1(C=CC2=C3C=CC=C2)=C3C(C(C=CC=C4)=C4C=C5)=C5O1	Cl[Mg]C1=CC=CC=C1	OC(C=CC1=C2C=CC=C1)=C2C3=C(C4=CC=CC=C4)C=CC5=C3C=CC=C5	Ni(COD)2	10	L9	CC(C1=CC=CC2=C1C=CC=C2)N3[C]N(C=C3)C(C)C4=C(C=CC=C5)C5=CC=C4	12	N/A	TBME	25	36	93
CO066	Table 1	13	C1(C=CC2=C3C=CC=C2)=C3C(C(C=CC=C4)=C4C=C5)=C5O1	Cl[Mg]C1=CC=CC=C1	OC(C=CC1=C2C=CC=C1)=C2C3=C(C4=CC=CC=C4)C=CC5=C3C=CC=C5	Ni(COD)2	10	L9	CC(C1=CC=CC2=C1C=CC=C2)N3[C]N(C=C3)C(C)C4=C(C=CC=C5)C5=CC=C4	12	N/A	TBME	25	36	95
CO066	Table 1	14	C1(C=CC2=C3C=CC=C2)=C3C(C(C=CC=C4)=C4C=C5)=C5O1	Cl[Mg]C1=CC=CC=C1	OC(C=CC1=C2C=CC=C1)=C2C3=C(C4=CC=CC=C4)C=CC5=C3C=CC=C5	Ni(COD)2	10	L9	CC(C1=CC=CC2=C1C=CC=C2)N3[C]N(C=C3)C(C)C4=C(C=CC=C5)C5=CC=C4	12	N/A	TBME	25	36	91
CO067	Table 1b	3	COC1=CC2=CC=CC=C2C=C1	CCCCC[Mg]I	CCCCCC1=CC2=CC=CC=C2C=C1	Ni(COD)2	5	dcype	P(CCP(C1CCCCC1)C2CCCCC2)(C3CCCCC3)C4CCCCC4	5	N/A	toluene	80	14	97
CO067	Table 1b	4	COC1=CC2=CC=CC=C2C=C1	CCCCC[Mg]Br	CCCCCC1=CC2=CC=CC=C2C=C1	Ni(COD)2	5	dcype	P(CCP(C1CCCCC1)C2CCCCC2)(C3CCCCC3)C4CCCCC4	5	N/A	toluene	80	14	99
CO067	Table 1b	4	COC1=CC2=CC=CC=C2C=C1	CCCCC[Mg]Cl	CCCCCC1=CC2=CC=CC=C2C=C1	Ni(COD)2	5	dcype	P(CCP(C1CCCCC1)C2CCCCC2)(C3CCCCC3)C4CCCCC4	5	N/A	toluene	80	14	99
CO068	Table 1	2	CC(OC(C)=O)(CC)C1=CC2=CC=CC=C2C=C1	CC1(C)COB(C2=CC(OC)=CC=C2)OC1	CC(C1=CC(OC)=CC=C1)(CC)C2=CC3=CC=CC=C3C=C2	Ni(COD)2	5	PCy2Ph	P(C1CCCCC1)(C2CCCCC2)C3=CC=CC=C3	11	NaOMe	toluene	80	Unknown	74
CO068	Table 1	3	CC(OC(C)=O)(CC)C1=CC2=CC=CC=C2C=C1	CC1(C)COB(C2=CC(OC)=CC=C2)OC1	CC(C1=CC(OC)=CC=C1)(CC)C2=CC3=CC=CC=C3C=C2	Ni(COD)2	5	PCy2Ph	P(C1CCCCC1)(C2CCCCC2)C3=CC=CC=C3	11	NaOMe	toluene	60	Unknown	72
CO068	Table 1	4	CC(OC(C)=O)(CC)C1=CC2=CC=CC=C2C=C1	CC1(C)COB(C2=CC(OC)=CC=C2)OC1	CC(C1=CC(OC)=CC=C1)(CC)C2=CC3=CC=CC=C3C=C2	Ni(COD)2	5	PCy2Ph	P(C1CCCCC1)(C2CCCCC2)C3=CC=CC=C3	11	NaOMe	THF	60	Unknown	63
CO068	Table 1	5	CC(OC(C)=O)(CC)C1=CC2=CC=CC=C2C=C1	CC1(C)COB(C2=CC(OC)=CC=C2)OC1	CC(C1=CC(OC)=CC=C1)(CC)C2=CC3=CC=CC=C3C=C2	Ni(COD)2	5	CyJohnPhos	C1(C2=C(P(C3CCCCC3)C4CCCCC4)C=CC=C2)=CC=CC=C1	11	NaOMe	THF	40	Unknown	57
CO068	Table 1	6	CC(OC(C)=O)(CC)C1=CC2=CC=CC=C2C=C1	CC1(C)COB(C2=CC(OC)=CC=C2)OC1	CC(C1=CC(OC)=CC=C1)(CC)C2=CC3=CC=CC=C3C=C2	Ni(COD)2	5	CyJohnPhos	C1(C2=C(P(C3CCCCC3)C4CCCCC4)C=CC=C2)=CC=CC=C1	5	NaOMe	THF	40	Unknown	81
CO068	Table 1	7	CC(OC(C)=O)(CC)C1=CC2=CC=CC=C2C=C1	CC1(C)COB(C2=CC(OC)=CC=C2)OC1	CC(C1=CC(OC)=CC=C1)(CC)C2=CC3=CC=CC=C3C=C2	Ni(COD)2	5	CyJohnPhos	C1(C2=C(P(C3CCCCC3)C4CCCCC4)C=CC=C2)=CC=CC=C1	5	NaOMe	dioxane	40	Unknown	97
CO068	Table 1	8	CC(OC(C)=O)(CC)C1=CC2=CC=CC=C2C=C1	CC1(C)COB(C2=CC(OC)=CC=C2)OC1	CC(C1=CC(OC)=CC=C1)(CC)C2=CC3=CC=CC=C3C=C2	Ni(COD)2	5	CyJohnPhos	C1(C2=C(P(C3CCCCC3)C4CCCCC4)C=CC=C2)=CC=CC=C1	5	NaOMe	2-Me-THF	40	Unknown	92
CO068	Table 1	9	CC(OC(C)=O)(CC)C1=CC2=CC=CC=C2C=C1	CC1(C)COB(C2=CC(OC)=CC=C2)OC1	CC(C1=CC(OC)=CC=C1)(CC)C2=CC3=CC=CC=C3C=C2	NiCl2•DME	5	CyJohnPhos	C1(C2=C(P(C3CCCCC3)C4CCCCC4)C=CC=C2)=CC=CC=C1	5	NaOMe	2-Me-THF	40	Unknown	90
CO068	Table 1	10	CC(OC(C)=O)(CC)C1=CC2=CC=CC=C2C=C1	COC1=CC=CC(B(O2)OB(C3=CC(OC)=CC=C3)OB2C4=CC=CC(OC)=C4)=C1	CC(C1=CC(OC)=CC=C1)(CC)C2=CC3=CC=CC=C3C=C2	NiCl2•DME	5	CyJohnPhos	C1(C2=C(P(C3CCCCC3)C4CCCCC4)C=CC=C2)=CC=CC=C1	5	NaOMe	2-Me-THF	40	Unknown	99
CO069	Table 1	2	O=S(OC1=CC=CC2=CC=CC=C21)(N(C)C)=O	COC1=CC=C(B(O)O)C=C1	COC(C=C1)=CC=C1C2=CC=CC3=CC=CC=C32	Ni(o-tolyl)Cl(PCy3)2	2.5	PCy3	P(C1CCCCC1)(C2CCCCC2)C3CCCCC3	5	K3PO4	toluene	25	4	55
CO069	Table 1	3	O=S(OC1=CC=CC2=CC=CC=C21)(N(C)C)=O	COC1=CC=C(B(O)O)C=C1	COC(C=C1)=CC=C1C2=CC=CC3=CC=CC=C32	NiCl2(PCy3)2	2.5	PCy3	P(C1CCCCC1)(C2CCCCC2)C3CCCCC3	5	K3PO4	toluene	25	4	50
CO069	Table 1	5	O=S(OC1=CC=CC2=CC=CC=C21)(N(C)C)=O	COC1=CC=C(B(O)O)C=C1	COC(C=C1)=CC=C1C2=CC=CC3=CC=CC=C32	Ni(dppf)(o-tolyl)Cl	2.5	dppf	C1=CC=C(C=C1)P([C-]2C=CC=C2)C3=CC=CC=C3.C1=CC=C(C=C1)P([C-]2C=CC=C2)C3=CC=CC=C3.[Fe+2]	2.5	K3PO4	toluene	25	4	99
CO069	Table 1	8	O=S(OC1=CC=CC2=CC=CC=C21)(N(C)C)=O	COC1=CC=C(B(O)O)C=C1	COC(C=C1)=CC=C1C2=CC=CC3=CC=CC=C32	Ni(dppf)2	2.5	dppf	C1=CC=C(C=C1)P([C-]2C=CC=C2)C3=CC=CC=C3.C1=CC=C(C=C1)P([C-]2C=CC=C2)C3=CC=CC=C3.[Fe+2]	5	K3PO4	toluene	25	4	99
CO070	Table 7	8	O=C(C1=CC2=CC=CC=C2C=C1)OC3=CC=CC=C3	COC(C=C1)=CC=C1CCCB2[C@@H]3CCC[C@@H]2CCC3	O=C(C1=CC2=CC=CC=C2C=C1)CCCC3=CC=C(OC)C=C3	Ni(COD)2	10	PCy3	P(C1CCCCC1)(C2CCCCC2)C3CCCCC3	20	Cs2CO3	toluene	110	10	82
CO070	Table 7	9	O=C(C1=CC2=CC=CC=C2C=C1)OC3=CC=CC=C3	COC(C=C1)=CC=C1CCCB2[C@@H]3CCC[C@@H]2CCC3	O=C(C1=CC2=CC=CC=C2C=C1)CCCC3=CC=C(OC)C=C3	Ni(COD)2	10	PBu3	CCCCP(CCCC)CCCC	20	Cs2CO3	toluene	110	10	90
CO070	Table 7	10	O=C(C1=CC2=CC=CC=C2C=C1)OC3=CC=CC=C3	COC(C=C1)=CC=C1CCCB2[C@@H]3CCC[C@@H]2CCC3	O=C(C1=CC2=CC=CC=C2C=C1)CCCC3=CC=C(OC)C=C3	Ni(COD)2	10	PBu3	CCCCP(CCCC)CCCC	20	K3PO4	toluene	110	10	50
CO070	Table 7	11	O=C(C1=CC2=CC=CC=C2C=C1)OC3=CC=CC=C3	COC(C=C1)=CC=C1CCCB2[C@@H]3CCC[C@@H]2CCC3	O=C(C1=CC2=CC=CC=C2C=C1)CCCC3=CC=C(OC)C=C3	Ni(COD)2	10	PBu3	CCCCP(CCCC)CCCC	20	K2CO3	toluene	110	10	40
CO070	Table 7	12	O=C(C1=CC2=CC=CC=C2C=C1)OC3=CC=CC=C3	COC(C=C1)=CC=C1CCCB2[C@@H]3CCC[C@@H]2CCC3	O=C(C1=CC2=CC=CC=C2C=C1)CCCC3=CC=C(OC)C=C3	Ni(COD)2	10	PBu3	CCCCP(CCCC)CCCC	20	Na2CO3	toluene	110	10	81
CO070	Table 7	13	O=C(C1=CC2=CC=CC=C2C=C1)OC3=CC=CC=C3	COC(C=C1)=CC=C1CCCB2[C@@H]3CCC[C@@H]2CCC3	O=C(C1=CC2=CC=CC=C2C=C1)CCCC3=CC=C(OC)C=C3	Ni(COD)2	10	PBu3	CCCCP(CCCC)CCCC	20	Cs2CO3	iPr2O	110	10	62
CO070	Table 7	14	O=C(C1=CC2=CC=CC=C2C=C1)OC3=CC=CC=C3	COC(C=C1)=CC=C1CCCB2[C@@H]3CCC[C@@H]2CCC3	O=C(C1=CC2=CC=CC=C2C=C1)CCCC3=CC=C(OC)C=C3	Ni(COD)2	10	PBu3	CCCCP(CCCC)CCCC	20	Cs2CO3	toluene	80	10	90
CO070	Table 7	15	O=C(C1=CC2=CC=CC=C2C=C1)OC3=CC=CC=C3	COC(C=C1)=CC=C1CCCB2[C@@H]3CCC[C@@H]2CCC3	O=C(C1=CC2=CC=CC=C2C=C1)CCCC3=CC=C(OC)C=C3	Ni(COD)2	10	PBu3	CCCCP(CCCC)CCCC	20	Cs2CO3	toluene	40	10	75
CO070	Table S1	1	O=C(C1=CC2=CC=CC=C2C=C1)OC3=CC=CC=C3	CCB(CC)CC	O=C(C1=CC2=CC=CC=C2C=C1)CC	Ni(COD)2	10	PCy3	P(C1CCCCC1)(C2CCCCC2)C3CCCCC3	40	Cs2CO3	toluene	80	16	46
CO070	Table S1	3	O=C(C1=CC2=CC=CC=C2C=C1)OC3=CC=CC=C3	CCB(CC)CC	O=C(C1=CC2=CC=CC=C2C=C1)CC	Ni(COD)2	10	PCy3	P(C1CCCCC1)(C2CCCCC2)C3CCCCC3	40	Cs2CO3	toluene	60	16	79
CO070	Table S1	4	O=C(C1=CC2=CC=CC=C2C=C1)OC3=CC=CC=C3	CCB(CC)CC	O=C(C1=CC2=CC=CC=C2C=C1)CC	Ni(COD)2	10	PCy3	P(C1CCCCC1)(C2CCCCC2)C3CCCCC3	40	Cs2CO3	toluene	40	16	85
CO070	Table S1	5	O=C(C1=CC2=CC=CC=C2C=C1)OC3=CC=CC=C3	CCB(CC)CC	O=C(C1=CC2=CC=CC=C2C=C1)CC	Ni(COD)2	10	PCy3	P(C1CCCCC1)(C2CCCCC2)C3CCCCC3	40	Cs2CO3	toluene	40	16	89
CO070	Table S1	6	O=C(C1=CC2=CC=CC=C2C=C1)OC3=CC=CC=C3	CCB(CC)CC	O=C(C1=CC2=CC=CC=C2C=C1)CC	Ni(COD)2	10	PCy3	P(C1CCCCC1)(C2CCCCC2)C3CCCCC3	40	Cs2CO3	toluene	40	16	53
CO070	Table S1	7	O=C(C1=CC2=CC=CC=C2C=C1)OC3=CC=CC=C3	CCB(CC)CC	O=C(C1=CC2=CC=CC=C2C=C1)CC	Ni(COD)2	10	PCy3	P(C1CCCCC1)(C2CCCCC2)C3CCCCC3	40	Cs2CO3	toluene	40	16	76
CO071	Table 2	2	C/C(OC)=C\CC1CCCCC1	Br[Mg]C1=CC=CC=C1	C/C(C1=CC=CC=C1)=C\CC2CCCCC2	Ni(COD)2	5	PCy3	P(C1CCCCC1)(C2CCCCC2)C3CCCCC3	20	N/A	2-Me-THF	70	18	47
CO071	Table 2	7	C/C(OC)=C\CC1CCCCC1	Br[Mg]C1=CC=CC=C1	C/C(C1=CC=CC=C1)=C\CC2CCCCC2	Ni(OAc)2	5	ICy	C1(N2[C]N(C=C2)C3CCCCC3)CCCCC1	10	N/A	2-Me-THF	70	18	56
CO072	Table 2	N/A	ClC1=NC(OC2=CC(/C=C/C(OCC)=O)=CC=C2)=NC(Cl)=N1	COC1=CC=C(B(O)O)C=C1	COC(C=C1)=CC=C1C2=CC(/C=C/C(OCC)=O)=CC=C2	NiCl2(Xantphos)	10	Xantphos	CC1(C)C2=C(OC3=C1C=CC=C3P(C4=CC=CC=C4)C5=CC=CC=C5)C(P(C6=CC=CC=C6)C7=CC=CC=C7)=CC=C2	10	K3PO4	toluene	120	24	90
CO073	Scheme 1	(a)	C12=CC=CC=C1C=CC([C@H]3OCC[C@@H](C4=CC=CC=C4)C3)=C2	C[Mg]I	CCC[C@@H](C1=CC=CC=C1)C[C@@H](C)C2=CC3=CC=CC=C3C=C2	Ni(COD)2	5	BINAP	C1(C2=C3C=CC=CC3=CC=C2P(C4=CC=CC=C4)C5=CC=CC=C5)=C6C=CC=CC6=CC=C1P(C7=CC=CC=C7)C8=CC=CC=C8	5	N/A	toluene	25	24	84
CO074	Figure 2	N/A	COC(OC)C1=CC=CC=C1	FC1=CC=C(B2OB(C3=CC=C(F)C=C3)OB(C4=CC=C(F)C=C4)O2)C=C1	FC(C=C1)=CC=C1C(OC)C2=CC=CC=C2	Ni(COD)2	15	L17	CC1=CC(C)=CC(C)=C1C2=CC(P(C3CCCC3)C4CCCC4)=CC(C5=C(C)C=C(C)C=C5C)=C2	30	N/A	toluene	60	16	78
CO074	Figure 2	N/A	COC(OC)C1=CC=CC=C1	FC1=CC=C(B2OB(C3=CC=C(F)C=C3)OB(C4=CC=C(F)C=C4)O2)C=C1	FC(C=C1)=CC=C1C(OC)C2=CC=CC=C2	Ni(COD)2	15	L13	CC(C1=CC(P(C2=CC(C(C)(C)C)=CC(C(C)(C)C)=C2)C3CCCCC3)=CC(C(C)(C)C)=C1)(C)C	30	N/A	toluene	60	16	67
CO074	Figure 2	N/A	COC(OC)C1=CC=CC=C1	FC1=CC=C(B2OB(C3=CC=C(F)C=C3)OB(C4=CC=C(F)C=C4)O2)C=C1	FC(C=C1)=CC=C1C(OC)C2=CC=CC=C2	Ni(COD)2	15	L16	CC(C1=CC(P(C2=CC(C(C)(C)C)=CC(C(C)(C)C)=C2)C3CCCC3)=CC(C(C)(C)C)=C1)(C)C	30	N/A	toluene	60	16	68
CO075	Table 1	1	O=C(O/C(OCC)=C(F)\F)C1=CC=CC=C1	COC1=CC=C(B(O)O)C=C1	F/C(F)=C(OCC)\C1=CC=C(OC)C=C1	Ni(COD)2	10	dppf	C1=CC=C(C=C1)P([C-]2C=CC=C2)C3=CC=CC=C3.C1=CC=C(C=C1)P([C-]2C=CC=C2)C3=CC=CC=C3.[Fe+2]	12	K2CO3	dioxane	60	15	84
CO075	Table 1	3	O=C(O/C(OCC)=C(F)\F)C1=CC=CC=C1	COC1=CC=C(B(O)O)C=C1	F/C(F)=C(OCC)\C1=CC=C(OC)C=C1	Ni(COD)2	10	dppf	C1=CC=C(C=C1)P([C-]2C=CC=C2)C3=CC=CC=C3.C1=CC=C(C=C1)P([C-]2C=CC=C2)C3=CC=CC=C3.[Fe+2]	12	K2CO3	dioxane	60	15	71
CO075	Table 1	6	O=C(O/C(OCC)=C(F)\F)C1=CC=CC=C1	COC1=CC=C(B(O)O)C=C1	F/C(F)=C(OCC)\C1=CC=C(OC)C=C1	Ni(COD)2	10	dppf	C1=CC=C(C=C1)P([C-]2C=CC=C2)C3=CC=CC=C3.C1=CC=C(C=C1)P([C-]2C=CC=C2)C3=CC=CC=C3.[Fe+2]	12	K3PO4	dioxane	60	15	53
CO075	Table 1	7	O=C(O/C(OCC)=C(F)\F)C1=CC=CC=C1	COC1=CC=C(B(O)O)C=C1	F/C(F)=C(OCC)\C1=CC=C(OC)C=C1	Ni(COD)2	10	dppf	C1=CC=C(C=C1)P([C-]2C=CC=C2)C3=CC=CC=C3.C1=CC=C(C=C1)P([C-]2C=CC=C2)C3=CC=CC=C3.[Fe+2]	12	Na2CO3	dioxane	60	15	62
CO075	Table 1	10	O=C(O/C(OCC)=C(F)\F)C1=CC=CC=C1	COC1=CC=C(B(O)O)C=C1	F/C(F)=C(OCC)\C1=CC=C(OC)C=C1	Ni(COD)2	10	dppf	C1=CC=C(C=C1)P([C-]2C=CC=C2)C3=CC=CC=C3.C1=CC=C(C=C1)P([C-]2C=CC=C2)C3=CC=CC=C3.[Fe+2]	12	K2CO3	THF	60	15	43
CO075	Table 1	14	O=C(O/C(OCC)=C(F)\F)C1=CC=CC=C1	COC1=CC=C(B(O)O)C=C1	F/C(F)=C(OCC)\C1=CC=C(OC)C=C1	Ni(PPh3)4	10	PPh3	P(C1=CC=CC=C1)(C2=CC=CC=C2)C3=CC=CC=C3	40	K2CO3	dioxane	60	15	40
CO076	Table 1	1	O=C1OC2=CC=CC=C2C(OS(C3=CC=C(C=C3)C)(=O)=O)=C1	OB(O)C1=CC=CC=C1	O=C1OC2=CC=CC=C2C(C3=CC=CC=C3)=C1	Ni(COD)2	3	PCy3	P(C1CCCCC1)(C2CCCCC2)C3CCCCC3	3	K3PO4	THF	25	24	90
CO077	Table 1	1	CC1=CC=C(S(OC2=CC=CC3=CC=CC=C32)(=O)=O)C=C1	COC1=CC=C(B(O)O)C=C1	COC(C=C1)=CC=C1C2=CC=CC3=CC=CC=C32	NiCl2(dppp)	1	dppp	P(CCCP(C1=CC=CC=C1)C2=CC=CC=C2)(C3=CC=CC=C3)C4=CC=CC=C4	1	K3PO4	dioxane	100	20	91
CO077	Table 1	2	CS(OC1=CC=CC2=CC=CC=C21)(=O)=O	COC1=CC=C(B(O)O)C=C1	COC(C=C1)=CC=C1C2=CC=CC3=CC=CC=C32	NiCl2(dppp)	1	dppp	P(CCCP(C1=CC=CC=C1)C2=CC=CC=C2)(C3=CC=CC=C3)C4=CC=CC=C4	1	K3PO4	dioxane	100	20	99
CO078	Table 2	1	CC1=CC=C(OS(C2=CC=C(C)C=C2)(=O)=O)C=C1	OB(O)C1=CC=CC=C1	CC1=CC=C(C2=CC=CC=C2)C=C1	(4-MeOC6H4)Ni(PCy3)2OTs	5	PCy3	P(C1CCCCC1)(C2CCCCC2)C3CCCCC3	10	K3PO4	THF	25	24	96
CO078	Table 2	16	CS(OC1=CC=CC(C(OC)=O)=C1)(=O)=O	OB(O)C1=CC=CC=C1	O=C(C1=CC(C2=CC=CC=C2)=CC=C1)OC	(4-MeOC6H4)Ni(PCy3)2OTs	5	PCy3	P(C1CCCCC1)(C2CCCCC2)C3CCCCC3	10	K3PO4	THF	25	36	92
CO079	Table 1	7	OCC1=CC=CC=C1	CC(O)C(O)=O	OC(C(O)=O)CCC1=CC=CC=C1	Ni(OAc)2	5	dppm	P(CP(C1=CC=CC=C1)C2=CC=CC=C2)(C3=CC=CC=C3)C4=CC=CC=C4	5	KOH	N/A	155	3	90
CO079	Table 1	8	OCC1=CC=CC=C1	CC(O)C(O)=O	OC(C(O)=O)CCC1=CC=CC=C1	Ni(OAc)2	5	dppe	P(CCP(C1=CC=CC=C1)C2=CC=CC=C2)(C3=CC=CC=C3)C4=CC=CC=C4	5	KOH	N/A	155	3	85
CO079	Table 1	9	OCC1=CC=CC=C1	CC(O)C(O)=O	OC(C(O)=O)CCC1=CC=CC=C1	Ni(OAc)2	5	PPh3	P(C1=CC=CC=C1)(C2=CC=CC=C2)C3=CC=CC=C3	5	KOH	N/A	155	3	92
CO079	Table 1	10	OCC1=CC=CC=C1	CC(O)C(O)=O	OC(C(O)=O)CCC1=CC=CC=C1	Ni(OAc)2	5	N/A	N/A	0	KOH	N/A	155	3	90
CO079	Table 1	11	OCC1=CC=CC=C1	CC(O)C(O)=O	OC(C(O)=O)CCC1=CC=CC=C1	Ni(OAc)2	5	N/A	N/A	0	KOH	N/A	155	3	87
CO079	Table 1	12	OCC1=CC=CC=C1	CC(O)C(O)=O	OC(C(O)=O)CCC1=CC=CC=C1	Ni(OAc)2	5	N/A	N/A	0	KOH	N/A	180	3	85
CO079	Table 1	17	OCC1=CC=CC=C1	CC(O)C(O)=O	OC(C(O)=O)CCC1=CC=CC=C1	NiCl2	5	N/A	N/A	0	KOH	N/A	155	3	90
CO079	Table 1	18	OCC1=CC=CC=C1	CC(O)C(O)=O	OC(C(O)=O)CCC1=CC=CC=C1	NiBr2	5	N/A	N/A	0	KOH	N/A	155	3	85
CO080	Table 1	4	CN1C2=CC=CC=C2C(OS(C3=CC=C(C)C=C3)(=O)=O)=CC1=O	CC1=CC([Zn]I)=CC(C)=C1	CN1C2=CC=CC=C2C(C3=CC(C)=CC(C)=C3)=CC1=O	NiCl2(dppe)	5	dppe	P(CCP(C1=CC=CC=C1)C2=CC=CC=C2)(C3=CC=CC=C3)C4=CC=CC=C4	5	N/A	THF	60	12	89
CO081	Table 1	1	C[Si](OC1=CC2=CC=CC=C2C=C1)(C)C	Br[Mg]C1=CC=CC=C1	C12=CC=CC=C1C=C(C3=CC=CC=C3)C=C2	NiCl2(PCy3)2	5	PCy3	P(C1CCCCC1)(C2CCCCC2)C3CCCCC3	10	N/A	toluene	30	1	80
CO081	Table 1	2	C[Si](OC1=CC2=CC=CC=C2C=C1)(C)C	Br[Mg]C1=CC=CC=C1	C12=CC=CC=C1C=C(C3=CC=CC=C3)C=C2	NiCl2(PCy3)2	5	PCy3	P(C1CCCCC1)(C2CCCCC2)C3CCCCC3	10	N/A	toluene	30	1	95
CO081	Table 1	3	C[Si](OC1=CC2=CC=CC=C2C=C1)(C)C	Br[Mg]C1=CC=CC=C1	C12=CC=CC=C1C=C(C3=CC=CC=C3)C=C2	NiCl2(PCy3)2	5	PCy3	P(C1CCCCC1)(C2CCCCC2)C3CCCCC3	10	N/A	toluene	30	1	66
CO081	Table 1	4	C[Si](OC1=CC2=CC=CC=C2C=C1)(C)C	Br[Mg]C1=CC=CC=C1	C12=CC=CC=C1C=C(C3=CC=CC=C3)C=C2	NiCl2(PCy3)2	5	PCy3	P(C1CCCCC1)(C2CCCCC2)C3CCCCC3	10	N/A	benzene	30	1	92
CO081	Table 1	5	C[Si](OC1=CC2=CC=CC=C2C=C1)(C)C	Br[Mg]C1=CC=CC=C1	C12=CC=CC=C1C=C(C3=CC=CC=C3)C=C2	NiCl2(PCy3)2	5	PCy3	P(C1CCCCC1)(C2CCCCC2)C3CCCCC3	10	N/A	o-xylene	30	1	88
CO081	Table 1	6	C[Si](OC1=CC2=CC=CC=C2C=C1)(C)C	Br[Mg]C1=CC=CC=C1	C12=CC=CC=C1C=C(C3=CC=CC=C3)C=C2	NiCl2(PCy3)2	5	PCy3	P(C1CCCCC1)(C2CCCCC2)C3CCCCC3	10	N/A	mesitylene	30	1	93
CO081	Table 1	7	C[Si](OC1=CC2=CC=CC=C2C=C1)(C)C	Br[Mg]C1=CC=CC=C1	C12=CC=CC=C1C=C(C3=CC=CC=C3)C=C2	NiCl2(PCy3)2	5	PCy3	P(C1CCCCC1)(C2CCCCC2)C3CCCCC3	10	N/A	DME	30	1	92
CO081	Table 1	8	C[Si](OC1=CC2=CC=CC=C2C=C1)(C)C	Br[Mg]C1=CC=CC=C1	C12=CC=CC=C1C=C(C3=CC=CC=C3)C=C2	NiCl2(PCy3)2	5	PCy3	P(C1CCCCC1)(C2CCCCC2)C3CCCCC3	10	N/A	dioxane	30	1	88
CO081	Table 1	9	C[Si](OC1=CC2=CC=CC=C2C=C1)(C)C	Br[Mg]C1=CC=CC=C1	C12=CC=CC=C1C=C(C3=CC=CC=C3)C=C2	NiCl2(PCy3)2	5	PCy3	P(C1CCCCC1)(C2CCCCC2)C3CCCCC3	10	N/A	THF	30	1	96
CO081	Table 1	10	C[Si](OC1=CC2=CC=CC=C2C=C1)(C)C	Br[Mg]C1=CC=CC=C1	C12=CC=CC=C1C=C(C3=CC=CC=C3)C=C2	NiCl2(PCy3)2	5	PCy3	P(C1CCCCC1)(C2CCCCC2)C3CCCCC3	10	N/A	Bu2O	30	1	76
CO081	Table 1	11	C[Si](OC1=CC2=CC=CC=C2C=C1)(C)C	Br[Mg]C1=CC=CC=C1	C12=CC=CC=C1C=C(C3=CC=CC=C3)C=C2	NiCl2(PCy3)2	5	PCy3	P(C1CCCCC1)(C2CCCCC2)C3CCCCC3	10	N/A	(EtO)2CH2	30	1	92
CO082	Table 2	1	O=C(OC1=CC(C=CC=C2)=C2C=C1)OC	COC1=CC=C(B(O)O)C=C1	COC1=CC=C(C2=CC=CC=C2)C=C1	Ni(COD)2	10	dcypf	C1(CCCCC1)P(C2CCCCC2)[C-]3C=CC=C3.C4(CCCCC4)P(C5CCCCC5)[C-]6C=CC=C6.[Fe+2]	10	K2CO3	toluene	60	48	95
CO083	Table 1	1	C=C(C1=CC=CC=C1)OC(C)=O	B1(C2=CC=CC=C2)OB(C3=CC=CC=C3)OB(C4=CC=CC=C4)O1	C=C(C1=CC=CC=C1)C2=CC=CC=C2	NiCl2(PCy3)2	4	PCy3	P(C1CCCCC1)(C2CCCCC2)C3CCCCC3	8	K3PO4	THF	110	20	72
CO083	Table 1	3	C=C(C1=CC=CC=C1)OC(C)=O	B1(C2=CC=CC=C2)OB(C3=CC=CC=C3)OB(C4=CC=CC=C4)O1	C=C(C1=CC=CC=C1)C2=CC=CC=C2	NiCl2(PCy3)2	4	PCy3	P(C1CCCCC1)(C2CCCCC2)C3CCCCC3	8	K3PO4	PhMe	110	20	51
CO083	Table 1	5	C=C(C1=CC=CC=C1)OC(C)=O	B1(C2=CC=CC=C2)OB(C3=CC=CC=C3)OB(C4=CC=CC=C4)O1	C=C(C1=CC=CC=C1)C2=CC=CC=C2	NiCl2(PCy3)2	4	PCy3	P(C1CCCCC1)(C2CCCCC2)C3CCCCC3	8	K3PO4	PhMe/dioxane	110	20	99
CO083	Table 1	8	C=C(C1=CC=CC=C1)OC(C)=O	B1(C2=CC=CC=C2)OB(C3=CC=CC=C3)OB(C4=CC=CC=C4)O1	C=C(C1=CC=CC=C1)C2=CC=CC=C2	NiCl2(dppp)	4	dppp	P(CCCP(C1=CC=CC=C1)C2=CC=CC=C2)(C3=CC=CC=C3)C4=CC=CC=C4	4	K3PO4	PhMe/dioxane	110	20	77
CO083	Table 1	9	C=C(C1=CC=CC=C1)OC(C)=O	B1(C2=CC=CC=C2)OB(C3=CC=CC=C3)OB(C4=CC=CC=C4)O1	C=C(C1=CC=CC=C1)C2=CC=CC=C2	NiCl2(dppf)	4	dppf	C1=CC=C(C=C1)P([C-]2C=CC=C2)C3=CC=CC=C3.C1=CC=C(C=C1)P([C-]2C=CC=C2)C3=CC=CC=C3.[Fe+2]	4	K3PO4	PhMe/dioxane	110	20	72
CO083	Table 1	18	C=C(C1=CC=CC=C1)OC(C)=O	B1(C2=CC=CC=C2)OB(C3=CC=CC=C3)OB(C4=CC=CC=C4)O1	C=C(C1=CC=CC=C1)C2=CC=CC=C2	NiCl2(PCy3)2	4	PCy3	P(C1CCCCC1)(C2CCCCC2)C3CCCCC3	8	K2CO3	PhMe/dioxane	110	20	79
CO083	Table 2	2d	C=C(C1=CC=CC=C1)OC(C)=O	OB(O)C1=CC=CC=C1	C=C(C1=CC=CC=C1)C2=CC=CC=C2	NiCl2(PCy3)2	4	PCy3	P(C1CCCCC1)(C2CCCCC2)C3CCCCC3	8	K3PO4	PhMe/dioxane	110	20	55
CO084	Table 1	1	O=P(N1CCOC1=O)(N2CCOC2=O)OC3=CC=CC4=CC=CC=C43	COC1=CC=C(B(O)O)C=C1	COC(C=C1)=CC=C1C2=CC=CC3=CC=CC=C32	NiCl2	10	dppp	P(CCCP(C1=CC=CC=C1)C2=CC=CC=C2)(C3=CC=CC=C3)C4=CC=CC=C4	20	K2CO3	dioxane	100	24	96
CO085	Table 1	3	COC1=CC2=CC=CC=C2C=C1	C[Zn](C1=CC=CC=C1)(C)([Li])([Li])C	C12=CC=CC=C1C=C(C3=CC=CC=C3)C=C4	NiCl2(PCy3)2/Ni(COD)2	4	PCy3	P(C1CCCCC1)(C2CCCCC2)C3CCCCC3	8	N/A	Bu2O	100	12	53
CO085	Table 1	4	COC1=CC2=CC=CC=C2C=C1	C[Zn](C1=CC=CC=C1)(C)([Li])([Li])C	C12=CC=CC=C1C=C(C3=CC=CC=C3)C=C4	NiCl2(PCy3)2/Ni(COD)2	4	PCy3	P(C1CCCCC1)(C2CCCCC2)C3CCCCC3	8	N/A	toluene	100	12	57
CO085	Table 1	5	COC1=CC2=CC=CC=C2C=C1	C[Zn](C1=CC=CC=C1)(C)([Li])([Li])C	C12=CC=CC=C1C=C(C3=CC=CC=C3)C=C4	NiCl2(PCy3)2/Ni(COD)2	4	PCy3	P(C1CCCCC1)(C2CCCCC2)C3CCCCC3	8	N/A	toluene	75	12	66
CO085	Table 1	6	COC1=CC2=CC=CC=C2C=C1	C[Zn](C1=CC=CC=C1)(C)([Li])([Li])C	C12=CC=CC=C1C=C(C3=CC=CC=C3)C=C4	NiCl2(PCy3)2/Ni(COD)2	4	PCy3	P(C1CCCCC1)(C2CCCCC2)C3CCCCC3	8	N/A	toluene	50	12	68
CO085	Table 1	7	COC1=CC2=CC=CC=C2C=C1	C[Zn](C1=CC=CC=C1)(C)([Li])([Li])C	C12=CC=CC=C1C=C(C3=CC=CC=C3)C=C4	NiCl2(PCy3)2/Ni(COD)2	4	PCy3	P(C1CCCCC1)(C2CCCCC2)C3CCCCC3	8	N/A	toluene	25	12	82
CO086	Table 1	1	COC1=CC2=CC=CC=C2C=C1	CC1=CC=C([Mg]Br)C=C1	CC(C=C1)=CC=C1C2=CC3=CC=CC=C3C=C2	Ni(COD)2	10	C1-CDC	CC(C)N1[C+]([C-2][C+]2N(C)C(C=CC=C3)=C3N2C)N(C4=C1C=CC=C4)C(C)C	10	N/A	m-xylene	100	16	97
CO086	Table 1	2	COC1=CC2=CC=CC=C2C=C1	CC1=CC=C([Mg]Br)C=C1	CC(C=C1)=CC=C1C2=CC3=CC=CC=C3C=C2	Ni(COD)2	10	C2-CDC	CN1[C+]([C-2][C+]2N(C)C(C=CC=C3)=C3N2C(C)C)N(C4=C1C=CC=C4)C(C)C	10	N/A	m-xylene	100	16	97
CO086	Table 1	3	COC1=CC2=CC=CC=C2C=C1	CC1=CC=C([Mg]Br)C=C1	CC(C=C1)=CC=C1C2=CC3=CC=CC=C3C=C2	Ni(COD)2	10	C1-CDC	CC(C)N1[C+]([C-2][C+]2N(C)C(C=CC=C3)=C3N2C)N(C4=C1C=CC=C4)C(C)C	10	N/A	m-xylene	100	16	73
CO086	Table 1	4	COC1=CC2=CC=CC=C2C=C1	CC1=CC=C([Mg]Br)C=C1	CC(C=C1)=CC=C1C2=CC3=CC=CC=C3C=C2	Ni(COD)2	10	C1-CDC	CC(C)N1[C+]([C-2][C+]2N(C)C(C=CC=C3)=C3N2C)N(C4=C1C=CC=C4)C(C)C	10	N/A	m-xylene	100	16	56
CO086	Table 1	5	COC1=CC2=CC=CC=C2C=C1	CC1=CC=C([Mg]Br)C=C1	CC(C=C1)=CC=C1C2=CC3=CC=CC=C3C=C2	Ni(COD)2	10	C1-CDC	CC(C)N1[C+]([C-2][C+]2N(C)C(C=CC=C3)=C3N2C)N(C4=C1C=CC=C4)C(C)C	10	N/A	m-xylene	100	4	70
CO086	Table 1	6	COC1=CC2=CC=CC=C2C=C1	CC1=CC=C([Mg]Br)C=C1	CC(C=C1)=CC=C1C2=CC3=CC=CC=C3C=C2	Ni(COD)2	10	C1-CDC	CC(C)N1[C+]([C-2][C+]2N(C)C(C=CC=C3)=C3N2C)N(C4=C1C=CC=C4)C(C)C	10	N/A	m-xylene	100	4	95
CO086	Table 1	7	COC1=CC2=CC=CC=C2C=C1	CC1=CC=C([Mg]Br)C=C1	CC(C=C1)=CC=C1C2=CC3=CC=CC=C3C=C2	Ni(COD)2	10	C1-CDC	CC(C)N1[C+]([C-2][C+]2N(C)C(C=CC=C3)=C3N2C)N(C4=C1C=CC=C4)C(C)C	10	N/A	m-xylene	60	4	95
CO086	Table 1	8	COC1=CC2=CC=CC=C2C=C1	CC1=CC=C([Mg]Br)C=C1	CC(C=C1)=CC=C1C2=CC3=CC=CC=C3C=C2	Ni(COD)2	10	IPr	CC(C1=C(N2[C]N(C3=C(C(C)C)C=CC=C3C(C)C)C=C2)C(C(C)C)=CC=C1)C	10	N/A	m-xylene	60	4	73
CO086	Table 1	9	COC1=CC2=CC=CC=C2C=C1	CC1=CC=C([Mg]Br)C=C1	CC(C=C1)=CC=C1C2=CC3=CC=CC=C3C=C2	Ni(COD)2	10	IMes	CC1=C(N2C=CN(C3=C(C)C=C(C)C=C3C)[C]2)C(C)=CC(C)=C1	10	N/A	m-xylene	60	4	74
CO086	Table 1	10	COC1=CC2=CC=CC=C2C=C1	CC1=CC=C([Mg]Br)C=C1	CC(C=C1)=CC=C1C2=CC3=CC=CC=C3C=C2	Ni(COD)2	10	ItBu	CC(N1C=CN(C(C)(C)C)[C]1)(C)C	10	N/A	m-xylene	60	4	75
CO086	Table 1	11	COC1=CC2=CC=CC=C2C=C1	CC1=CC=C([Mg]Br)C=C1	CC(C=C1)=CC=C1C2=CC3=CC=CC=C3C=C2	Ni(COD)2	10	ICy	C1(N2[C]N(C=C2)C3CCCCC3)CCCCC1	10	N/A	m-xylene	60	4	73
CO087	Table 1	3	CC1=CC=C(S(OC2=CC=C(C#N)C=C2)(=O)=O)C=C1	OB(O)C1=CC=CC=C1	N#CC1=CC=C(C2=CC=CC=C2)C=C1	1a	5	1a	CC(C=C(C)C=C1C)=C1N2C=CN(CC3=NC(CN4[C]N(C5=C(C)C=C(C)C=C5C)C=C4)=CC=C3)[C]2	5	K3PO4	ClCH2CH2Cl	120	24	43
CO087	Table 1	4	CC1=CC=C(S(OC2=CC=C(C#N)C=C2)(=O)=O)C=C1	OB(O)C1=CC=CC=C1	N#CC1=CC=C(C2=CC=CC=C2)C=C1	1a	5	1a	CC(C=C(C)C=C1C)=C1N2C=CN(CC3=NC(CN4[C]N(C5=C(C)C=C(C)C=C5C)C=C4)=CC=C3)[C]2	5	K3PO4	dioxane	120	24	40
CO087	Table 1	5	CC1=CC=C(S(OC2=CC=C(C#N)C=C2)(=O)=O)C=C1	OB(O)C1=CC=CC=C1	N#CC1=CC=C(C2=CC=CC=C2)C=C1	1a	5	1a	CC(C=C(C)C=C1C)=C1N2C=CN(CC3=NC(CN4[C]N(C5=C(C)C=C(C)C=C5C)C=C4)=CC=C3)[C]2	5	K3PO4	toluene	120	24	58
CO087	Table 1	6	CC1=CC=C(S(OC2=CC=C(C#N)C=C2)(=O)=O)C=C1	OB(O)C1=CC=CC=C1	N#CC1=CC=C(C2=CC=CC=C2)C=C1	1a	5	1a	CC(C=C(C)C=C1C)=C1N2C=CN(CC3=NC(CN4[C]N(C5=C(C)C=C(C)C=C5C)C=C4)=CC=C3)[C]2	5	K3PO4	CH3CN	120	24	63
CO087	Table 1	7	CC1=CC=C(S(OC2=CC=C(C#N)C=C2)(=O)=O)C=C1	OB(O)C1=CC=CC=C1	N#CC1=CC=C(C2=CC=CC=C2)C=C1	1a	5	1a	CC(C=C(C)C=C1C)=C1N2C=CN(CC3=NC(CN4[C]N(C5=C(C)C=C(C)C=C5C)C=C4)=CC=C3)[C]2	5	K3PO4	THF	120	24	69
CO087	Table 1	8	CC1=CC=C(S(OC2=CC=C(C#N)C=C2)(=O)=O)C=C1	OB(O)C1=CC=CC=C1	N#CC1=CC=C(C2=CC=CC=C2)C=C1	1a	5	1a	CC(C=C(C)C=C1C)=C1N2C=CN(CC3=NC(CN4[C]N(C5=C(C)C=C(C)C=C5C)C=C4)=CC=C3)[C]2	5	K3PO4	DME	120	24	95
CO087	Table 1	9	CC1=CC=C(S(OC2=CC=C(C#N)C=C2)(=O)=O)C=C1	OB(O)C1=CC=CC=C1	N#CC1=CC=C(C2=CC=CC=C2)C=C1	1a	5	1a	CC(C=C(C)C=C1C)=C1N2C=CN(CC3=NC(CN4[C]N(C5=C(C)C=C(C)C=C5C)C=C4)=CC=C3)[C]2	5	K3PO4	DME	100	24	70
CO087	Table 1	10	CC1=CC=C(S(OC2=CC=C(C#N)C=C2)(=O)=O)C=C1	OB(O)C1=CC=CC=C1	N#CC1=CC=C(C2=CC=CC=C2)C=C1	1a	1	1a	CC(C=C(C)C=C1C)=C1N2C=CN(CC3=NC(CN4[C]N(C5=C(C)C=C(C)C=C5C)C=C4)=CC=C3)[C]2	1	K3PO4	DME	120	24	59
CO087	Table 1	11	CC1=CC=C(S(OC2=CC=C(C#N)C=C2)(=O)=O)C=C1	OB(O)C1=CC=CC=C1	N#CC1=CC=C(C2=CC=CC=C2)C=C1	1b	5	1b	CC(C)C(C=CC=C1C(C)C)=C1N2C=CN(CC3=NC(CN4[C]N(C5=C(C(C)C)C=CC=C5C(C)C)C=C4)=CC=C3)[C]2	5	K3PO4	DME	120	48	84
CO088	Table 1	2	COC1=CC=C(OS(C2=CC=C(C)C=C2)(=O)=O)C=C1	OB(O)C1=CC=CC=C1	COC1=CC=C(C2=CC=CC=C2)C=C1	NiCl2(PPh3)2	5	PPh3	P(C1=CC=CC=C1)(C2=CC=CC=C2)C3=CC=CC=C3	15	K2CO3	toluene	100	5	51
CO088	Table 1	3	COC1=CC=C(OS(C2=CC=C(C)C=C2)(=O)=O)C=C1	OB(O)C1=CC=CC=C1	COC1=CC=C(C2=CC=CC=C2)C=C1	Ni(PPh3)2(1-naphthyl)-Br	5	PPh3	P(C1=CC=CC=C1)(C2=CC=CC=C2)C3=CC=CC=C3	15	K2CO3	toluene	100	5	50
CO088	Table 1	4	COC1=CC=C(OS(C2=CC=C(C)C=C2)(=O)=O)C=C1	OB(O)C1=CC=CC=C1	COC1=CC=C(C2=CC=CC=C2)C=C1	Ni(PPh3)2(phenyl)Br	5	PPh3	P(C1=CC=CC=C1)(C2=CC=CC=C2)C3=CC=CC=C3	15	K2CO3	toluene	100	5	65
CO088	Table 1	5	COC1=CC=C(OS(C2=CC=C(C)C=C2)(=O)=O)C=C1	OB(O)C1=CC=CC=C1	COC1=CC=C(C2=CC=CC=C2)C=C1	Ni(PPh3)2(1-naphthyl)-Cl	5	PPh3	P(C1=CC=CC=C1)(C2=CC=CC=C2)C3=CC=CC=C3	15	K2CO3	toluene	100	5	83
CO088	Table 1	6	COC1=CC=C(OS(C2=CC=C(C)C=C2)(=O)=O)C=C1	OB(O)C1=CC=CC=C1	COC1=CC=C(C2=CC=CC=C2)C=C1	Ni(PPh3)2(1-naphthyl)-Cl	5	PPh3	P(C1=CC=CC=C1)(C2=CC=CC=C2)C3=CC=CC=C3	10	K2CO3	toluene	100	5	66
CO088	Table 1	7	COC1=CC=C(OS(C2=CC=C(C)C=C2)(=O)=O)C=C1	OB(O)C1=CC=CC=C1	COC1=CC=C(C2=CC=CC=C2)C=C1	Ni(PPh3)2(1-naphthyl)-Cl	5	PPh3	P(C1=CC=CC=C1)(C2=CC=CC=C2)C3=CC=CC=C3	20	K2CO3	toluene	100	5	71
CO088	Table 1	8	COC1=CC=C(OS(C2=CC=C(C)C=C2)(=O)=O)C=C1	OB(O)C1=CC=CC=C1	COC1=CC=C(C2=CC=CC=C2)C=C1	Ni(PPh3)2(1-naphthyl)-Cl	5	IPr	CC(C)C(C=CC=C1C(C)C)=C1N2[C]N(C3=C(C(C)C)C=CC=C3C(C)C)C=C2	2.5	K2CO3	toluene	100	5	67
CO088	Table 1	11	COC1=CC=C(OS(C2=CC=C(C)C=C2)(=O)=O)C=C1	OB(O)C1=CC=CC=C1	COC1=CC=C(C2=CC=CC=C2)C=C1	Ni(PPh3)2(1-naphthyl)-Cl	5	PPh3	P(C1=CC=CC=C1)(C2=CC=CC=C2)C3=CC=CC=C3	15	K3PO4	toluene	100	5	70
CO088	Table 1	16	COC1=CC=C(OS(C2=CC=C(C)C=C2)(=O)=O)C=C1	OB(O)C1=CC=CC=C1	COC1=CC=C(C2=CC=CC=C2)C=C1	Ni(PPh3)2(1-naphthyl)-Cl	5	PPh3	P(C1=CC=CC=C1)(C2=CC=CC=C2)C3=CC=CC=C3	15	K2CO3	toluene	100	5	50
CO088	Table 1	17	COC1=CC=C(OS(C2=CC=C(C)C=C2)(=O)=O)C=C1	OB(O)C1=CC=CC=C1	COC1=CC=C(C2=CC=CC=C2)C=C1	Ni(PPh3)2(1-naphthyl)-Cl	3	PPh3	P(C1=CC=CC=C1)(C2=CC=CC=C2)C3=CC=CC=C3	15	K2CO3	toluene	100	5	79
CO089	Table 1	1	CC1=CC(OS(C2=CC=C(C)C=C2)(=O)=O)=CC=C1	OB(O)C1=CC=CC=C1	CC1=CC(C2=CC=CC=C2)=CC=C1	Ni(PPh3)2(1-naphthyl)-Cl	5	PPh3	P(C1=CC=CC=C1)(C2=CC=CC=C2)C3=CC=CC=C3	10	K2CO3	toluene	25	24	46
CO089	Table 1	2	CC1=CC(OS(C2=CC=C(C)C=C2)(=O)=O)=CC=C1	OB(O)C1=CC=CC=C1	CC1=CC(C2=CC=CC=C2)=CC=C1	Ni(PPh3)2(1-naphthyl)-Cl	5	PPh3	P(C1=CC=CC=C1)(C2=CC=CC=C2)C3=CC=CC=C3	20	K2CO3	toluene	25	24	48
CO089	Table 1	3	CC1=CC(OS(C2=CC=C(C)C=C2)(=O)=O)=CC=C1	OB(O)C1=CC=CC=C1	CC1=CC(C2=CC=CC=C2)=CC=C1	Ni(PPh3)2(1-naphthyl)-Cl	5	PCy3	P(C1CCCCC1)(C2CCCCC2)C3CCCCC3	10	K2CO3	toluene	25	24	83
CO089	Table 1	4	CC1=CC(OS(C2=CC=C(C)C=C2)(=O)=O)=CC=C1	OB(O)C1=CC=CC=C1	CC1=CC(C2=CC=CC=C2)=CC=C1	Ni(PPh3)2(1-naphthyl)-Cl	5	PCy3	P(C1CCCCC1)(C2CCCCC2)C3CCCCC3	10	K2CO3	toluene	25	24	80
CO089	Table 1	5	CC1=CC(OS(C2=CC=C(C)C=C2)(=O)=O)=CC=C1	OB(O)C1=CC=CC=C1	CC1=CC(C2=CC=CC=C2)=CC=C1	Ni(PPh3)2(1-naphthyl)-Cl	5	PCy3	P(C1CCCCC1)(C2CCCCC2)C3CCCCC3	5	K2CO3	toluene	25	24	88
CO089	Table 1	6	CC1=CC(OS(C2=CC=C(C)C=C2)(=O)=O)=CC=C1	OB(O)C1=CC=CC=C1	CC1=CC(C2=CC=CC=C2)=CC=C1	Ni(PPh3)2(1-naphthyl)-Cl	5	PCy3	P(C1CCCCC1)(C2CCCCC2)C3CCCCC3	7.5	K2CO3	toluene	25	24	91
CO089	Table 1	7	CC1=CC(OS(C2=CC=C(C)C=C2)(=O)=O)=CC=C1	OB(O)C1=CC=CC=C1	CC1=CC(C2=CC=CC=C2)=CC=C1	Ni(PPh3)2(1-naphthyl)-Br	5	PCy3	P(C1CCCCC1)(C2CCCCC2)C3CCCCC3	7.5	K2CO3	toluene	25	24	89
CO089	Table 1	16	CC1=CC(OS(C2=CC=C(C)C=C2)(=O)=O)=CC=C1	OB(O)C1=CC=CC=C1	CC1=CC(C2=CC=CC=C2)=CC=C1	Ni(PPh3)2(1-naphthyl)-Cl	5	PCy3	P(C1CCCCC1)(C2CCCCC2)C3CCCCC3	7.5	K3PO4	toluene	25	24	89
CO089	Table 1	17	CC1=CC(OS(C2=CC=C(C)C=C2)(=O)=O)=CC=C1	OB(O)C1=CC=CC=C1	CC1=CC(C2=CC=CC=C2)=CC=C1	Ni(PPh3)2(1-naphthyl)-Cl	5	PCy3	P(C1CCCCC1)(C2CCCCC2)C3CCCCC3	7.5	Na2CO3	toluene	25	24	68
CO089	Table 1	19	CC1=CC(OS(C2=CC=C(C)C=C2)(=O)=O)=CC=C1	OB(O)C1=CC=CC=C1	CC1=CC(C2=CC=CC=C2)=CC=C1	Ni(PPh3)2(1-naphthyl)-Cl	5	PCy3	P(C1CCCCC1)(C2CCCCC2)C3CCCCC3	7.5	K2CO3	dioxane	25	24	49
CO089	Table 1	20	CC1=CC(OS(C2=CC=C(C)C=C2)(=O)=O)=CC=C1	OB(O)C1=CC=CC=C1	CC1=CC(C2=CC=CC=C2)=CC=C1	Ni(PPh3)2(1-naphthyl)-Cl	5	PCy3	P(C1CCCCC1)(C2CCCCC2)C3CCCCC3	7.5	K2CO3	THF	25	24	40
CO089	Table 1	21	CC1=CC(OS(C2=CC=C(C)C=C2)(=O)=O)=CC=C1	OB(O)C1=CC=CC=C1	CC1=CC(C2=CC=CC=C2)=CC=C1	Ni(PPh3)2(1-naphthyl)-Cl	5	PCy3	P(C1CCCCC1)(C2CCCCC2)C3CCCCC3	7.5	K2CO3	toluene	25	24	52
CO090	Table 1	1	O=S(OC1=CC=CC2=C1C=CC=C2)(N(C)C)=O	COC1=CC=C(B(O)O)C=C1	COC(C=C1)=CC=C1C2=CC=CC3=CC=CC=C32	NiCl2(dppp)	1	dppp	P(CCCP(C1=CC=CC=C1)C2=CC=CC=C2)(C3=CC=CC=C3)C4=CC=CC=C4	1	K3PO4	dioxane	110	24	84
CO091	Table	4	OC1CCCC=C1	CC[Mg]I	CCC1CCCC=C1	NiCl2(dppe)	0.15	dppe	P(CCP(C1=CC=CC=C1)C2=CC=CC=C2)(C3=CC=CC=C3)C4=CC=CC=C4	0.15	N/A	heptane	Unknown	120	84
CO091	Table	5	OC1CCC=C1	C[Mg]I	CC1CCC=C1	NiCl2(dppe)	0.15	dppe	P(CCP(C1=CC=CC=C1)C2=CC=CC=C2)(C3=CC=CC=C3)C4=CC=CC=C4	0.15	N/A	heptane	Unknown	160	80
CO092	Table 2	6	O=C(OC1=CC2=CC=CC=C2C=C1)N(CC)CC	CC(CO1)(C)COB1C2=CC=CC=C2	C12=C(C=CC=C2)C=C(C3=CC=CC=C3)C=C1	Ni(COD)2	10	IAd	N1([C]N(C=C1)C23C[C@H]4C[C@H](C[C@H](C4)C3)C2)C56C[C@H]7C[C@H](C[C@H](C7)C6)C5	40	K3PO4	toluene	120	24	88
CO092	Table 2	7	O=C(OC1=CC=CC=C1)N(CC)CC	CC(CO1)(C)COB1C2=CC=CC=C2	C1(C2=CC=CC=C2)=CC=CC=C1	Ni(COD)2	10	IAd	N1([C]N(C=C1)C23C[C@H]4C[C@H](C[C@H](C4)C3)C2)C56C[C@H]7C[C@H](C[C@H](C7)C6)C5	40	K3PO4	toluene	120	24	40
CO092	Table 2	8	O=C(OC1=CC=CC=C1)N(CC)CC	CC(CO1)(C)COB1C2=CC=CC=C2	C1(C2=CC=CC=C2)=CC=CC=C1	Ni(COD)2	5	IAd	N1([C]N(C=C1)C23C[C@H]4C[C@H](C[C@H](C4)C3)C2)C56C[C@H]7C[C@H](C[C@H](C7)C6)C5	15	K3PO4	toluene	120	24	71
CO093	Table 1	1	OC/C=C/C1=CC=CC=C1	CN(C1=CC=C([Zn]Cl)C=C1)C	CN(C(C=C1)=CC=C1C/C=C/C2=CC=CC=C2)C	NiCl2(dppe)	10	dppe	P(CCP(C1=CC=CC=C1)C2=CC=CC=C2)(C3=CC=CC=C3)C4=CC=CC=C4	10	N/A	toluene/iPr2O	120	24	60
CO093	Table 1	3	OC/C=C/C1=CC=CC=C1	CN(C1=CC=C([Zn]Cl)C=C1)C	CN(C(C=C1)=CC=C1C/C=C/C2=CC=CC=C2)C	NiCl2(dppe)	10	dppe	P(CCP(C1=CC=CC=C1)C2=CC=CC=C2)(C3=CC=CC=C3)C4=CC=CC=C4	10	NaH	toluene/iPr2O	120	24	61
CO093	Table 1	4	OC/C=C/C1=CC=CC=C1	CN(C1=CC=C([Zn]Cl)C=C1)C	CN(C(C=C1)=CC=C1C/C=C/C2=CC=CC=C2)C	NiCl2(dppe)	10	dppe	P(CCP(C1=CC=CC=C1)C2=CC=CC=C2)(C3=CC=CC=C3)C4=CC=CC=C4	10	MeLi	toluene/iPr2O	120	24	89
CO093	Table 1	5	OC/C=C/C1=CC=CC=C1	CN(C1=CC=C([Zn]Cl)C=C1)C	CN(C(C=C1)=CC=C1C/C=C/C2=CC=CC=C2)C	NiCl2(dppe)	10	dppe	P(CCP(C1=CC=CC=C1)C2=CC=CC=C2)(C3=CC=CC=C3)C4=CC=CC=C4	10	MeMgCl	toluene/iPr2O	120	24	92
CO093	Table 1	6	OC/C=C/C1=CC=CC=C1	CN(C1=CC=C([Zn]Cl)C=C1)C	CN(C(C=C1)=CC=C1C/C=C/C2=CC=CC=C2)C	NiCl2(dppe)	10	dppe	P(CCP(C1=CC=CC=C1)C2=CC=CC=C2)(C3=CC=CC=C3)C4=CC=CC=C4	10	MeZnCl	toluene/iPr2O	120	24	92
CO093	Table 1	7	OC/C=C/C1=CC=CC=C1	CN(C1=CC=C([Zn]Cl)C=C1)C	CN(C(C=C1)=CC=C1C/C=C/C2=CC=CC=C2)C	NiCl2(dppf)	10	dppf	C1=CC=C(C=C1)P([C-]2C=CC=C2)C3=CC=CC=C3.C1=CC=C(C=C1)P([C-]2C=CC=C2)C3=CC=CC=C3.[Fe+2]	10	MeZnCl	toluene/iPr2O	120	24	85
CO093	Table 1	8	OC/C=C/C1=CC=CC=C1	CN(C1=CC=C([Zn]Cl)C=C1)C	CN(C(C=C1)=CC=C1C/C=C/C2=CC=CC=C2)C	NiCl2(dppp)	10	dppp	P(CCP(C1=CC=CC=C1)C2=CC=CC=C2)(C3=CC=CC=C3)C4=CC=CC=C4	10	MeZnCl	toluene/iPr2O	120	24	82
CO093	Table 1	9	OC/C=C/C1=CC=CC=C1	CN(C1=CC=C([Zn]Cl)C=C1)C	CN(C(C=C1)=CC=C1C/C=C/C2=CC=CC=C2)C	NiCl2(PPh3)2	10	PPh3	P(CCP(C1=CC=CC=C1)C2=CC=CC=C2)(C3=CC=CC=C3)C4=CC=CC=C4	20	MeZnCl	toluene/iPr2O	120	24	40
CO093	Table 1	11	OC/C=C/C1=CC=CC=C1	CN(C1=CC=C([Zn]Cl)C=C1)C	CN(C(C=C1)=CC=C1C/C=C/C2=CC=CC=C2)C	Ni(COD)2	10	dppe	P(CCP(C1=CC=CC=C1)C2=CC=CC=C2)(C3=CC=CC=C3)C4=CC=CC=C4	10	MeZnCl	toluene/iPr2O	120	24	83
CO093	Table 1	12	OC/C=C/C1=CC=CC=C1	CN(C1=CC=C([Zn]Cl)C=C1)C	CN(C(C=C1)=CC=C1C/C=C/C2=CC=CC=C2)C	Ni(acac)2	10	dppe	P(CCP(C1=CC=CC=C1)C2=CC=CC=C2)(C3=CC=CC=C3)C4=CC=CC=C4	10	MeZnCl	toluene/iPr2O	120	24	92
CO093	Table 1	13	OC/C=C/C1=CC=CC=C1	CN(C1=CC=C([Zn]Cl)C=C1)C	CN(C(C=C1)=CC=C1C/C=C/C2=CC=CC=C2)C	NiCl2•DME	10	dppe	P(CCP(C1=CC=CC=C1)C2=CC=CC=C2)(C3=CC=CC=C3)C4=CC=CC=C4	10	MeZnCl	toluene/iPr2O	120	24	83
CO093	Table 1	14	OC/C=C/C1=CC=CC=C1	CN(C1=CC=C([Zn]Cl)C=C1)C	CN(C(C=C1)=CC=C1C/C=C/C2=CC=CC=C2)C	Ni(OTf)2	10	dppe	P(CCP(C1=CC=CC=C1)C2=CC=CC=C2)(C3=CC=CC=C3)C4=CC=CC=C4	10	MeZnCl	toluene/iPr2O	120	24	98
CO093	Table 1	15	OC/C=C/C1=CC=CC=C1	CN(C1=CC=C([Zn]Cl)C=C1)C	CN(C(C=C1)=CC=C1C/C=C/C2=CC=CC=C2)C	Ni(OTf)2	10	dppe	P(CCP(C1=CC=CC=C1)C2=CC=CC=C2)(C3=CC=CC=C3)C4=CC=CC=C4	10	MeZnCl	toluene/iPr2O	120	24	72
CO093	Table 1	19	OC/C=C/C1=CC=CC=C1	CN(C1=CC=C([Zn]Cl)C=C1)C	CN(C(C=C1)=CC=C1C/C=C/C2=CC=CC=C2)C	Ni(OTf)2	10	dppe	P(CCP(C1=CC=CC=C1)C2=CC=CC=C2)(C3=CC=CC=C3)C4=CC=CC=C4	10	MeZnCl	toluene/iPr2O	120	12	92
CO093	Table 1	20	OC/C=C/C1=CC=CC=C1	CN(C1=CC=C([Zn]Cl)C=C1)C	CN(C(C=C1)=CC=C1C/C=C/C2=CC=CC=C2)C	Ni(OTf)2	10	dppe	P(CCP(C1=CC=CC=C1)C2=CC=CC=C2)(C3=CC=CC=C3)C4=CC=CC=C4	10	MeZnCl	toluene/iPr2O	120	24	95
CO093	Table 1	21	OC/C=C/C1=CC=CC=C1	CN(C1=CC=C([Zn]Cl)C=C1)C	CN(C(C=C1)=CC=C1C/C=C/C2=CC=CC=C2)C	Ni(OTf)2	10	dppe	P(CCP(C1=CC=CC=C1)C2=CC=CC=C2)(C3=CC=CC=C3)C4=CC=CC=C4	10	MeZnCl	toluene/iPr2O	80	24	75
CO093	Table 1	22	OC/C=C/C1=CC=CC=C1	CN(C1=CC=C([Zn]Cl)C=C1)C	CN(C(C=C1)=CC=C1C/C=C/C2=CC=CC=C2)C	Ni(OTf)2	10	dppe	P(CCP(C1=CC=CC=C1)C2=CC=CC=C2)(C3=CC=CC=C3)C4=CC=CC=C4	10	MeZnCl	toluene	120	24	96
CO093	Table 1	25	OC/C=C/C1=CC=CC=C1	CN(C1=CC=C([Zn]Cl)C=C1)C	CN(C(C=C1)=CC=C1C/C=C/C2=CC=CC=C2)C	Ni(OTf)2	10	dppe	P(CCP(C1=CC=CC=C1)C2=CC=CC=C2)(C3=CC=CC=C3)C4=CC=CC=C4	10	MeZnCl	Bu2O	120	24	84
CO093	Table 1	28	OC/C=C/C1=CC=CC=C1	CN(C1=CC=C([Zn]Cl)C=C1)C	CN(C(C=C1)=CC=C1C/C=C/C2=CC=CC=C2)C	Ni(OTf)2	10	dppe	P(CCP(C1=CC=CC=C1)C2=CC=CC=C2)(C3=CC=CC=C3)C4=CC=CC=C4	10	MeZnCl	toluene/iPr2O	120	24	98
CO093	Table 1	29	OC/C=C/C1=CC=CC=C1	CN(C1=CC=C([Zn]Cl)C=C1)C	CN(C(C=C1)=CC=C1C/C=C/C2=CC=CC=C2)C	Ni(OTf)2	5	dppe	P(CCP(C1=CC=CC=C1)C2=CC=CC=C2)(C3=CC=CC=C3)C4=CC=CC=C4	5	MeZnCl	toluene/iPr2O	120	24	92
CO094	Table 2	1	O=C(C1=CC=C(OS(=O)(C(F)(F)F)=O)C=C1)OC	OB(O)C1=CC=CC=C1	O=C(OC)C1=CC=C(C2=CC=CC=C2)C=C1	NiCl2(dppf)	10	dppf	C1=CC=C(C=C1)P([C-]2C=CC=C2)C3=CC=CC=C3.C1=CC=C(C=C1)P([C-]2C=CC=C2)C3=CC=CC=C3.[Fe+2]	10	K3PO4	THF	67	24	80
CO094	Table 2	2	O=C(OC)C1=CC=C(C=C1)OS(=O)(C2=CC=C(F)C=C2)=O	OB(O)C1=CC=CC=C1	O=C(OC)C1=CC=C(C2=CC=CC=C2)C=C1	NiCl2(dppf)	10	dppf	C1=CC=C(C=C1)P([C-]2C=CC=C2)C3=CC=CC=C3.C1=CC=C(C=C1)P([C-]2C=CC=C2)C3=CC=CC=C3.[Fe+2]	10	K3PO4	THF	67	24	42
CO094	Table 2	3	O=C(OC)C1=CC=C(C=C1)OS(=O)(C2=CC=C(C)C=C2)=O	OB(O)C1=CC=CC=C1	O=C(OC)C1=CC=C(C2=CC=CC=C2)C=C1	NiCl2(dppf)	10	dppf	C1=CC=C(C=C1)P([C-]2C=CC=C2)C3=CC=CC=C3.C1=CC=C(C=C1)P([C-]2C=CC=C2)C3=CC=CC=C3.[Fe+2]	10	K3PO4	THF	67	24	40
CO094	Table 2	6	O=C(C)C1=CC=C(C=C1)OS(=O)(C)=O	OB(O)C1=CC=CC=C1	O=C(C)C1=CC=C(C2=CC=CC=C2)C=C1	NiCl2(dppf)	10	dppf	C1=CC=C(C=C1)P([C-]2C=CC=C2)C3=CC=CC=C3.C1=CC=C(C=C1)P([C-]2C=CC=C2)C3=CC=CC=C3.[Fe+2]	10	K3PO4	THF	67	24	51
CO095	Table 2	5	CC1=CC=C(OS(C)(=O)=O)C=C1	C[Mg]I	CC1=CC=C(C)C=C1	NiCl2(dppf)	10	dppf	C1=CC=C(C=C1)P([C-]2C=CC=C2)C3=CC=CC=C3.C1=CC=C(C=C1)P([C-]2C=CC=C2)C3=CC=CC=C3.[Fe+2]	10	N/A	THF	Unknown	10	83
CO095	Table 2	6	CC1=CC=C(OS(C)(=O)=O)C=C1	C[Zn]Cl	CC1=CC=C(C)C=C1	NiCl2(dppf)	10	dppf	C1=CC=C(C=C1)P([C-]2C=CC=C2)C3=CC=CC=C3.C1=CC=C(C=C1)P([C-]2C=CC=C2)C3=CC=CC=C3.[Fe+2]	10	N/A	THF	Unknown	10	73
CO096	Table 1	1	O=C1OC2=CC=CC=C2C(OP(OCC)(OCC)=O)=C1	Br[Zn]C1=CC=CC=C1	O=C1OC2=CC=CC=C2C(C3=CC=CC=C3)=C1	NiCl2(dppe)	1	dppe	P(CCP(C1=CC=CC=C1)C2=CC=CC=C2)(C3=CC=CC=C3)C4=CC=CC=C4	1	N/A	benzene	25	0.5	82
CO097	Table 1	6	O=C(C1=CC=C(OS(C)(=O)=O)C=C1)OC	OB(O)C1=CC=CC=C1	O=C(C1=CC=C(C2=CC=CC=C2)C=C1)OC	NiCl2(PCy3)2	5	PCy3	P(C1CCCCC1)(C2CCCCC2)C3CCCCC3	20	K3PO4	dioxane	80	14	95
CO097	Table 1	7	O=C(C1=CC=C(OS(C)(=O)=O)C=C1)OC	OB(O)C1=CC=CC=C1	O=C(C1=CC=C(C2=CC=CC=C2)C=C1)OC	NiCl2(PPh3)2	5	PPh3	P(CCP(C1=CC=CC=C1)C2=CC=CC=C2)(C3=CC=CC=C3)C4=CC=CC=C4	20	K3PO4	toluene	80	14	88
CO097	Table 1	8	O=C(C1=CC=C(OS(C)(=O)=O)C=C1)OC	OB(O)C1=CC=CC=C1	O=C(C1=CC=C(C2=CC=CC=C2)C=C1)OC	NiCl2(dppe)	5	dppe	P(CCP(C1=CC=CC=C1)C2=CC=CC=C2)(C3=CC=CC=C3)C4=CC=CC=C4	10	K3PO4	dioxane	80	14	95
CO097	Table 1	9	O=C(C1=CC=C(OS(C)(=O)=O)C=C1)OC	OB(O)C1=CC=CC=C1	O=C(C1=CC=C(C2=CC=CC=C2)C=C1)OC	NiCl2(dppb)	5	dppb	P(CCCCP(C1=CC=CC=C1)C2=CC=CC=C2)(C3=CC=CC=C3)C4=CC=CC=C4	10	K3PO4	dioxane	80	14	70
CO097	Table 1	11	O=C(C1=CC=C(OS(C2=CC=C(C)C=C2)(=O)=O)C=C1)OC	OB(O)C1=CC=CC=C1	O=C(C1=CC=C(C2=CC=CC=C2)C=C1)OC	NiCl2(PCy3)2	5	PCy3	P(C1CCCCC1)(C2CCCCC2)C3CCCCC3	20	K3PO4	dioxane	80	14	95
CO097	Table 1	12	O=C(C1=CC=C(OS(C2=CC=C(C)C=C2)(=O)=O)C=C1)OC	OB(O)C1=CC=CC=C1	O=C(C1=CC=C(C2=CC=CC=C2)C=C1)OC	NiCl2(PPh3)2	5	PPh3	P(CCP(C1=CC=CC=C1)C2=CC=CC=C2)(C3=CC=CC=C3)C4=CC=CC=C4	20	K3PO4	dioxane	80	14	75
CO097	Table 1	13	O=C(C1=CC=C(OS(C2=CC=C(C)C=C2)(=O)=O)C=C1)OC	OB(O)C1=CC=CC=C1	O=C(C1=CC=C(C2=CC=CC=C2)C=C1)OC	NiCl2(dppe)	5	dppe	P(CCP(C1=CC=CC=C1)C2=CC=CC=C2)(C3=CC=CC=C3)C4=CC=CC=C4	10	K3PO4	toluene	80	14	87
CO097	Table 1	14	O=C(C1=CC=C(OS(C2=CC=C(C)C=C2)(=O)=O)C=C1)OC	OB(O)C1=CC=CC=C1	O=C(C1=CC=C(C2=CC=CC=C2)C=C1)OC	NiCl2(dppb)	5	dppb	P(CCCCP(C1=CC=CC=C1)C2=CC=CC=C2)(C3=CC=CC=C3)C4=CC=CC=C4	10	K3PO4	toluene	80	14	50
CO098	Table 1	1	C=C(OP(OC1=CC=CC=C1)(OC2=CC=CC=C2)=O)C3CCCCC3	OB(O)C1=CC=CC=C1	C=C(C1=CC=CC=C1)C2CCCCC2	Ni(COD)2	4	PCy3	P(C1CCCCC1)(C2CCCCC2)C3CCCCC3	8	K3PO4	THF	65	26	83
CO098	Table 1	4	C=C(OP(OC1=CC=CC=C1)(OC2=CC=CC=C2)=O)C3CCCCC3	OB(O)C1=CC=CC=C1	C=C(C1=CC=CC=C1)C2CCCCC2	Ni(COD)2	5	PCy3	P(C1CCCCC1)(C2CCCCC2)C3CCCCC3	10	K3PO4	THF	75	26	100
CO099	Table 1	3	O=C(OC1=CC2=CC=CC=C2C=C1)N(CC)CC	OB(O)C1=CC=CC=C1	C12=CC=CC=C1C=C(C3=CC=CC=C3)C=C2	NiCl2(PCy3)2	10	PCy3	P(C1CCCCC1)(C2CCCCC2)C3CCCCC3	20	K3PO4	toluene	180	0.17	94
CO099	Table 1	4	O=C(OC1=CC2=CC=CC=C2C=C1)N(CC)CC	OB(O)C1=CC=CC=C1	C12=CC=CC=C1C=C(C3=CC=CC=C3)C=C2	NiCl2(PCy3)2	5	PCy3	P(C1CCCCC1)(C2CCCCC2)C3CCCCC3	10	K3PO4	toluene	180	0.17	95
CO099	Table 1	5	O=C(OC1=CC2=CC=CC=C2C=C1)N(CC)CC	OB(O)C1=CC=CC=C1	C12=CC=CC=C1C=C(C3=CC=CC=C3)C=C2	NiCl2(PCy3)2	5	PCy3	P(C1CCCCC1)(C2CCCCC2)C3CCCCC3	10	K3PO4	toluene	150	0.17	78
CO099	Table 1	6	O=C(OC1=CC2=CC=CC=C2C=C1)N(CC)CC	OB(O)C1=CC=CC=C1	C12=CC=CC=C1C=C(C3=CC=CC=C3)C=C2	NiCl2(PCy3)2	2	PCy3	P(C1CCCCC1)(C2CCCCC2)C3CCCCC3	4	K3PO4	toluene	180	0.17	89
CO099	Table 2	1	O=S(OC1=CC2=CC=CC=C2C=C1)(N(C)C)=O	OB(O)C1=CC=CC=C1	C12=CC=CC=C1C=C(C3=CC=CC=C3)C=C2	NiCl2(PCy3)2	5	PCy3	P(C1CCCCC1)(C2CCCCC2)C3CCCCC3	10	K3PO4	toluene	180	0.17	90
CO100	Table 1	2	O=P(OCC)(OCC)OC1=CC2=CC=CC=C2C=C1	OB(O)C1=CC=CC=C1	C12=CC=CC=C1C=C(C3=CC=CC=C3)C=C2	NiCl2(dppp)	10	dppp	P(CCCP(C1=CC=CC=C1)C2=CC=CC=C2)(C3=CC=CC=C3)C4=CC=CC=C4	10	K3PO4	dioxane	110	24	42
CO100	Table 1	3	O=P(OCC)(OCC)OC1=CC2=CC=CC=C2C=C1	OB(O)C1=CC=CC=C1	C12=CC=CC=C1C=C(C3=CC=CC=C3)C=C2	NiCl2(dppb)	10	dppb	P(CCCCP(C1=CC=CC=C1)C2=CC=CC=C2)(C3=CC=CC=C3)C4=CC=CC=C4	10	K3PO4	dioxane	110	24	44
CO100	Table 1	4	O=P(OCC)(OCC)OC1=CC2=CC=CC=C2C=C1	OB(O)C1=CC=CC=C1	C12=CC=CC=C1C=C(C3=CC=CC=C3)C=C2	NiCl2(dppf)	10	dppf	C1=CC=C(C=C1)P([C-]2C=CC=C2)C3=CC=CC=C3.C1=CC=C(C=C1)P([C-]2C=CC=C2)C3=CC=CC=C3.[Fe+2]	10	K3PO4	dioxane	110	24	70
CO100	Table 1	6	O=P(OCC)(OCC)OC1=CC2=CC=CC=C2C=C1	OB(O)C1=CC=CC=C1	C12=CC=CC=C1C=C(C3=CC=CC=C3)C=C2	NiCl2(PCy3)2	10	PCy3	P(C1CCCCC1)(C2CCCCC2)C3CCCCC3	20	K3PO4	dioxane	110	24	93
CO100	Table 1	7	O=P(OCC)(OCC)OC1=CC2=CC=CC=C2C=C1	OB(O)C1=CC=CC=C1	C12=CC=CC=C1C=C(C3=CC=CC=C3)C=C2	NiCl2(PCy3)2	10	PCy3	P(C1CCCCC1)(C2CCCCC2)C3CCCCC3	20	K3PO4	dioxane	80	24	86
CO100	Table 1	8	O=P(OCC)(OCC)OC1=CC2=CC=CC=C2C=C1	OB(O)C1=CC=CC=C1	C12=CC=CC=C1C=C(C3=CC=CC=C3)C=C2	NiCl2(PCy3)2	10	PCy3	P(C1CCCCC1)(C2CCCCC2)C3CCCCC3	20	K3PO4	THF	80	24	88
CO100	Table 1	9	O=P(OCC)(OCC)OC1=CC2=CC=CC=C2C=C1	OB(O)C1=CC=CC=C1	C12=CC=CC=C1C=C(C3=CC=CC=C3)C=C2	NiCl2(PCy3)2	10	PCy3	P(C1CCCCC1)(C2CCCCC2)C3CCCCC3	20	K3PO4	toluene	110	24	85
CO100	Table 1	10	O=P(OCC)(OCC)OC1=CC2=CC=CC=C2C=C1	OB(O)C1=CC=CC=C1	C12=CC=CC=C1C=C(C3=CC=CC=C3)C=C2	NiCl2(PCy3)2	10	PCy3	P(C1CCCCC1)(C2CCCCC2)C3CCCCC3	20	KOH	dioxane	110	24	80
CO100	Table 1	11	O=P(OCC)(OCC)OC1=CC2=CC=CC=C2C=C1	OB(O)C1=CC=CC=C1	C12=CC=CC=C1C=C(C3=CC=CC=C3)C=C2	NiCl2(PCy3)2	10	PCy3	P(C1CCCCC1)(C2CCCCC2)C3CCCCC3	20	K2CO3	dioxane	110	24	92
CO101	Table 1	1	O=C(OC)C1=CC=C(C=C1)OS(C)(=O)=O	CC(CO1)(C)COB1C2=CC=C(OC)C=C2	O=C(C1=CC=C(C2=CC=C(OC)C=C2)C=C1)OC	Ni(COD)2	4	PCy3	P(C1CCCCC1)(C2CCCCC2)C3CCCCC3	8	K3PO4	THF	25	12	80
CO101	Table 1	2	O=C(OC)C1=CC=C(C=C1)OS(C)(=O)=O	CC(CO1)(C)COB1C2=CC=C(OC)C=C2	O=C(C1=CC=C(C2=CC=C(OC)C=C2)C=C1)OC	Ni(COD)2	6	PCy3	P(C1CCCCC1)(C2CCCCC2)C3CCCCC3	12	K3PO4	THF	25	12	100
CO101	Table 1	3	O=C(OC)C1=CC=C(C=C1)OS(C)(=O)=O	CC(CO1)(C)COB1C2=CC=C(OC)C=C2	O=C(C1=CC=C(C2=CC=C(OC)C=C2)C=C1)OC	Ni(COD)2	6	PCy3	P(C1CCCCC1)(C2CCCCC2)C3CCCCC3	12	K3PO4	THF	25	8	100
CO101	Table 1	4	O=C(OC)C1=CC=C(C=C1)OS(C)(=O)=O	CC(CO1)(C)COB1C2=CC=C(OC)C=C2	O=C(C1=CC=C(C2=CC=C(OC)C=C2)C=C1)OC	Ni(COD)2	6	PCy3	P(C1CCCCC1)(C2CCCCC2)C3CCCCC3	12	K3PO4	THF	25	4	94
CO101	Table 1	5	O=C(OC)C1=CC=C(C=C1)OS(C)(=O)=O	CC(CO1)(C)COB1C2=CC=C(OC)C=C2	O=C(C1=CC=C(C2=CC=C(OC)C=C2)C=C1)OC	Ni(COD)2	6	PCy3	P(C1CCCCC1)(C2CCCCC2)C3CCCCC3	12	K3PO4	THF	25	4	96
CO101	Table 1	6	O=C(OC)C1=CC=C(C=C1)OS(C)(=O)=O	CC(CO1)(C)COB1C2=CC=C(OC)C=C2	O=C(C1=CC=C(C2=CC=C(OC)C=C2)C=C1)OC	Ni(COD)2	5	PCy3	P(C1CCCCC1)(C2CCCCC2)C3CCCCC3	10	K3PO4	THF	25	4	99
CO101	Table 1	7	O=C(OC)C1=CC=C(C=C1)OS(C)(=O)=O	CC(CO1)(C)COB1C2=CC=C(OC)C=C2	O=C(C1=CC=C(C2=CC=C(OC)C=C2)C=C1)OC	Ni(COD)2	5	PCy3	P(C1CCCCC1)(C2CCCCC2)C3CCCCC3	10	K3PO4	THF	25	4	84
CO101	Table 1	8	O=C(OC)C1=CC=C(C=C1)OS(C)(=O)=O	CC(CO1)(C)COB1C2=CC=C(OC)C=C2	O=C(C1=CC=C(C2=CC=C(OC)C=C2)C=C1)OC	Ni(COD)2	6	PCy3	P(C1CCCCC1)(C2CCCCC2)C3CCCCC3	12	K3PO4	THF	25	8	95
CO101	Table 1	9	O=C(OC)C1=CC=C(C=C1)OS(C)(=O)=O	CC(CO1)(C)COB1C2=CC=C(OC)C=C2	O=C(C1=CC=C(C2=CC=C(OC)C=C2)C=C1)OC	Ni(COD)2	6	PCy3	P(C1CCCCC1)(C2CCCCC2)C3CCCCC3	12	K3PO4	THF	25	12	93
CO102	Table 3	1	CS(OC1=CC2=CC=CC=C2C=C1)(=O)=O	CC(CO1)(C)COB1C2=CC=C(C(OC)=O)C=C2	O=C(C(C=C1)=CC=C1C2=CC3=CC=CC=C3C=C2)OC	Ni(COD)2	10	PCy3	P(C1CCCCC1)(C2CCCCC2)C3CCCCC3	40	K3PO4	toluene	24	18	52
CO102	Table 3	2	O=S(OC1=CC2=CC=CC=C2C=C1)(N(C)C)=O	CC(CO1)(C)COB1C2=CC=C(C(OC)=O)C=C2	O=C(C(C=C1)=CC=C1C2=CC3=CC=CC=C3C=C2)OC	Ni(COD)2	10	PCy3	P(C1CCCCC1)(C2CCCCC2)C3CCCCC3	40	K3PO4	toluene	24	18	49
CO102	Table 3	3	CC(C)(C)C(OC1=CC2=CC=CC=C2C=C1)=O	CC(CO1)(C)COB1C2=CC=C(C(OC)=O)C=C2	O=C(C(C=C1)=CC=C1C2=CC3=CC=CC=C3C=C2)OC	Ni(COD)2	10	PCy3	P(C1CCCCC1)(C2CCCCC2)C3CCCCC3	40	K3PO4	toluene	24	36	45
CO102	Table 3	5	O=C(OC1=CC2=CC=CC=C2C=C1)N(CC)CC	CC(CO1)(C)COB1C2=CC=C(C(OC)=O)C=C2	O=C(C(C=C1)=CC=C1C2=CC3=CC=CC=C3C=C2)OC	Ni(COD)2	10	PCy3	P(C1CCCCC1)(C2CCCCC2)C3CCCCC3	40	K3PO4	toluene	24	12	40
CO103	Table 1	1	O=C(OC)C1=CC=C(C=C1)OS(C)(=O)=O	CC1(C)COB(C2=CC=C(C=C2)OC)OC1	COC(C=C1)=CC=C1C2=CC=C(C(OC)=O)C=C2	Ni(PPh3)2(1-naphthyl)-Cl	5	PPh3	P(C1=CC=CC=C1)(C2=CC=CC=C2)C3=CC=CC=C3	10	K2CO3	THF	25	37	57
CO103	Table 1	2	O=C(OC)C1=CC=C(C=C1)OS(C)(=O)=O	CC1(C)COB(C2=CC=C(C=C2)OC)OC1	COC(C=C1)=CC=C1C2=CC=C(C(OC)=O)C=C2	Ni(PPh3)2(1-naphthyl)-Cl	5	PPh3	P(C1=CC=CC=C1)(C2=CC=CC=C2)C3=CC=CC=C3	10	K2CO3	THF	25	36	85
CO103	Table 1	3	O=C(OC)C1=CC=C(C=C1)OS(C)(=O)=O	CC1(C)COB(C2=CC=C(C=C2)OC)OC1	COC(C=C1)=CC=C1C2=CC=C(C(OC)=O)C=C2	Ni(PPh3)2(1-naphthyl)-Cl	5	PPh3	P(C1=CC=CC=C1)(C2=CC=CC=C2)C3=CC=CC=C3	10	K3PO4	THF	25	12	94
CO103	Table 1	4	O=C(OC)C1=CC=C(C=C1)OS(C)(=O)=O	CC1(C)COB(C2=CC=C(C=C2)OC)OC1	COC(C=C1)=CC=C1C2=CC=C(C(OC)=O)C=C2	Ni(PPh3)2(1-naphthyl)-Cl	5	PPh3	P(C1=CC=CC=C1)(C2=CC=CC=C2)C3=CC=CC=C3	10	K3PO4	THF	25	18	93
CO103	Table 1	5	O=C(OC)C1=CC=C(C=C1)OS(C)(=O)=O	CC1(C)COB(C2=CC=C(C=C2)OC)OC1	COC(C=C1)=CC=C1C2=CC=C(C(OC)=O)C=C2	Ni(PPh3)2(1-naphthyl)-Cl	5	PCy3	P(C1CCCCC1)(C2CCCCC2)C3CCCCC3	10	K3PO4	THF	25	12	90
CO103	Table 1	6	O=C(OC)C1=CC=C(C=C1)OS(C)(=O)=O	CC1(C)COB(C2=CC=C(C=C2)OC)OC1	COC(C=C1)=CC=C1C2=CC=C(C(OC)=O)C=C2	Ni(PPh3)2(1-naphthyl)-Cl	5	PCy3	P(C1CCCCC1)(C2CCCCC2)C3CCCCC3	10	K3PO4	THF	25	5	99
CO103	Table 1	7	O=C(OC)C1=CC=C(C=C1)OS(C)(=O)=O	CC1(C)COB(C2=CC=C(C=C2)OC)OC1	COC(C=C1)=CC=C1C2=CC=C(C(OC)=O)C=C2	Ni(PPh3)2(1-naphthyl)-Cl	5	PCy3	P(C1CCCCC1)(C2CCCCC2)C3CCCCC3	10	K3PO4	THF	25	4	99
CO103	Table 1	8	O=C(OC)C1=CC=C(C=C1)OS(C)(=O)=O	CC1(C)COB(C2=CC=C(C=C2)OC)OC1	COC(C=C1)=CC=C1C2=CC=C(C(OC)=O)C=C2	Ni(PPh3)2(1-naphthyl)-Cl	5	PCy3	P(C1CCCCC1)(C2CCCCC2)C3CCCCC3	10	K3PO4	THF	25	12	96
CO103	Table 1	9	O=C(OC)C1=CC=C(C=C1)OS(C)(=O)=O	CC1(C)COB(C2=CC=C(C=C2)OC)OC1	COC(C=C1)=CC=C1C2=CC=C(C(OC)=O)C=C2	Ni(PPh3)2(1-naphthyl)-Cl	5	PCy3	P(C1CCCCC1)(C2CCCCC2)C3CCCCC3	10	K2CO3	THF	25	37	49
CO104	Table 2	1	O=C(OC)C1=CC=C(C=C1)OS(C)(=O)=O	COC1=CC=C(B2OC(C)(C)C(C)(C)O2)C=C1	COC(C=C1)=CC=C1C2=CC=C(C(OC)=O)C=C2	Ni(COD)2	1	PCy3	P(C1CCCCC1)(C2CCCCC2)C3CCCCC3	2	K3PO4	THF	25	60	60
CO104	Table 2	2	O=C(OC)C1=CC=C(C=C1)OS(C)(=O)=O	CC1(C)COB(C2=CC=C(C=C2)OC)OC1	COC(C=C1)=CC=C1C2=CC=C(C(OC)=O)C=C2	Ni(COD)2	1	PCy3	P(C1CCCCC1)(C2CCCCC2)C3CCCCC3	2	K3PO4	THF	25	60	96
CO105	Table 1	6	COC1=CC=C(OC2=NC(OC)=NC(OC)=N2)C=C1	OB(O)C1=CC=CC=C1	COC1=CC=C(C2=CC=CC=C2)C=C1	NiCl2(PCy3)2	5	PCy3	P(C1CCCCC1)(C2CCCCC2)C3CCCCC3	10	K3PO4	toluene	110	24	67
CO105	Table 1	11	COC1=CC=C(OC2=NC(OC)=NC(OC)=N2)C=C1	OB(O)C1=CC=CC=C1	COC1=CC=C(C2=CC=CC=C2)C=C1	NiCl2(PPh3)2	5	PPh3	P(C1=CC=CC=C1)(C2=CC=CC=C2)C3=CC=CC=C3	10	K3PO4	toluene	110	24	47
CO105	Table 1	13	COC1=CC=C(OC2=NC(OC)=NC(OC)=N2)C=C1	OB(O)C1=CC=CC=C1	COC1=CC=C(C2=CC=CC=C2)C=C1	NiCl2(dppp)	5	dppp	P(CCCP(C1=CC=CC=C1)C2=CC=CC=C2)(C3=CC=CC=C3)C4=CC=CC=C4	5	K3PO4	toluene	110	24	81
CO105	Table 1	15	COC1=CC=C(OC2=NC(OC)=NC(OC)=N2)C=C1	OB(O)C1=CC=CC=C1	COC1=CC=C(C2=CC=CC=C2)C=C1	NiCl2(dppf)	5	dppf	C1=CC=C(C=C1)P([C-]2C=CC=C2)C3=CC=CC=C3.C1=CC=C(C=C1)P([C-]2C=CC=C2)C3=CC=CC=C3.[Fe+2]	5	K3PO4	toluene	110	24	90
CO106	Table 1	1	O=P(OC1=CCCC=C1)(OC2=CC=CC=C2)OC3=CC=CC=C3	CCCC[Mg]Br	CCCCC1=CCCC=C1	NiCl2(dppe)	1	dppe	P(CCP(C1=CC=CC=C1)C2=CC=CC=C2)(C3=CC=CC=C3)C4=CC=CC=C4	2	N/A	THF	40	20	85
CO106	Table 1	3	O=P(OC1=CCCC=C1)(OCC)OCC	CCCCCCCC[Mg]Br	CCCCCCCCC1=CCCC=C1	NiCl2(dppe)	1	dppe	P(CCP(C1=CC=CC=C1)C2=CC=CC=C2)(C3=CC=CC=C3)C4=CC=CC=C4	2	N/A	THF	40	20	81
CO107	Table 1	4	CCC(OC(OCC)=O)/C=C/C1=CC=CC=C1	COB(C#CC1=CC=CC=C1)OC.CO[Li]	CCC(C#CC1=CC=CC=C1)/C=C/C2=CC=CC=C2	NiCl2(dppe)	3	dppe	P(CCP(C1=CC=CC=C1)C2=CC=CC=C2)(C3=CC=CC=C3)C4=CC=CC=C4	3	N/A	THF	60	12	68
CO107	Table 1	5	CCC(OC(OCC)=O)/C=C/C1=CC=CC=C1	COB(C#CC1=CC=CC=C1)OC.CO[Li]	CCC(C#CC1=CC=CC=C1)/C=C/C2=CC=CC=C2	NiCl2(dppe)	3	dppe	P(CCP(C1=CC=CC=C1)C2=CC=CC=C2)(C3=CC=CC=C3)C4=CC=CC=C4	3	N/A	THF/MeCN	60	12	64
CO107	Table 1	6	CCC(OC(OCC)=O)/C=C/C1=CC=CC=C1	COB(C#CC1=CC=CC=C1)OC.CO[Li]	CCC(C#CC1=CC=CC=C1)/C=C/C2=CC=CC=C2	NiCl2(dppen)	3	dppen	P(/C=C\P(C1=CC=CC=C1)C2=CC=CC=C2)(C3=CC=CC=C3)C4=CC=CC=C4	3	N/A	THF	60	12	70
CO108	Table 1	1	O=C(OC)C1=CC=C(C=C1)OS(C)(=O)=O	CC1C(C)OB(C2=CC=CO2)O1	O=C(C1=CC=C(C2=CC=CO2)C=C1)OC	NiCl2(PPh3)2	10	PPh3	P(C1=CC=CC=C1)(C2=CC=CC=C2)C3=CC=CC=C3	20	MeLi	THF	20	11	82
CO108	Table 1	2	O=C(OC)C1=CC=C(C=C1)OS(C)(=O)=O	CC1C(C)OB(C2=CC=CO2)O1	O=C(C1=CC=C(C2=CC=CO2)C=C1)OC	NiCl2(dppf)	10	dppf	C1=CC=C(C=C1)P([C-]2C=CC=C2)C3=CC=CC=C3.C1=CC=C(C=C1)P([C-]2C=CC=C2)C3=CC=CC=C3.[Fe+2]	10	MeLi	THF	20	14	91
CO108	Table 1	14	O=C(C1=CC=C(OS(C2=CC=C(C)C=C2)(=O)=O)C=C1)OC	CC1C(C)OB(C2=CC=CC=C2)O1	O=C(C1=CC=C(C2=CC=CC=C2)C=C1)OC	NiCl2(PPh3)2	10	PPh3	P(C1=CC=CC=C1)(C2=CC=CC=C2)C3=CC=CC=C3	20	BuLi	THF	20	14	83
CO109	Table 1	3	O=C(OC1C=CCCC1)C	OB(O)C1=CC=CC=C1	C1(C2=CC=CC=C2)C=CCCC1	Ni(acac)2	5	I	CC(C1COC(C2=CC=C[C-]2P(C3=CC=CC=C3)C4=CC=CC=C4)=N1)C.[CH-]5C=CC=C5.[Fe+2]	5	K3PO4	THF	reflux	17	87
CO109	Table 1	6	O=C(OC1C=CCCC1)C	OB(O)C1=CC=CC=C1	C1(C2=CC=CC=C2)C=CCCC1	Ni(acac)2	5	I	CC(C1COC(C2=CC=C[C-]2P(C3=CC=CC=C3)C4=CC=CC=C4)=N1)C.[CH-]5C=CC=C5.[Fe+2]	5	NaOH	THF	reflux	17	57
CO109	Table 1	7	O=C(OC1C=CCCC1)C	OB(O)C1=CC=CC=C1	C1(C2=CC=CC=C2)C=CCCC1	Ni(acac)2	5	I	CC(C1COC(C2=CC=C[C-]2P(C3=CC=CC=C3)C4=CC=CC=C4)=N1)C.[CH-]5C=CC=C5.[Fe+2]	5	KOH	THF	reflux	17	65
CO109	Table 1	8	O=C(OC1C=CCCC1)C	OB(O)C1=CC=CC=C1	C1(C2=CC=CC=C2)C=CCCC1	Ni(acac)2	5	I	CC(C1COC(C2=CC=C[C-]2P(C3=CC=CC=C3)C4=CC=CC=C4)=N1)C.[CH-]5C=CC=C5.[Fe+2]	5	KOH	THF	reflux	17	46
CO109	Table 1	9	O=C(OC1C=CCCC1)C	OB(O)C1=CC=CC=C1	C1(C2=CC=CC=C2)C=CCCC1	Ni(acac)2	5	I	CC(C1COC(C2=CC=C[C-]2P(C3=CC=CC=C3)C4=CC=CC=C4)=N1)C.[CH-]5C=CC=C5.[Fe+2]	10	KOH	THF	reflux	17	81
CO109	Table 2	3	O=C(OC1C=CCCC1)C	OB(O)C1=CC=CC=C1	C1(C2=CC=CC=C2)C=CCCC1	Ni(acac)2	5	II	CC(C1COC(C2=CC=C[C-]2P(C3=CC=CC=C3)C4=CC=CC=C4)=N1)(C)C.[CH-]5C=CC=C5.[Fe+2]	10	KOH	THF	reflux	17	43
CO109	Table 2	4	O=C(OC1C=CCCC1)C	OB(O)C1=CC=CC=C1	C1(C2=CC=CC=C2)C=CCCC1	Ni(acac)2	5	III	C1(P(C2=CC=CC=C2)[C-]3C=CC=C3C4=NC(CC5=CC=CC=C5)CO4)=CC=CC=C1.[CH-]6C=CC=C6.[Fe+2]	10	KOH	THF	reflux	17	48
CO109	Table 2	6	O=C(OC1C=CCCC1)C	OB(O)C1=CC=CC=C1	C1(C2=CC=CC=C2)C=CCCC1	Ni(acac)2	5	V	C1(P(C2=CC=CC=C2)[C-]3C=CC=C3C4=NC(C5=CC=CC=C5)C(C6=CC=CC=C6)O4)=CC=CC=C1.[CH-]7C=CC=C7.[Fe+2]	10	KOH	THF	reflux	17	48
CO109	Table 3	3	OC1C=CCCC1	OB(O)C1=CC=CC=C1	C1(C2=CC=CC=C2)C=CCCC1	Ni(acac)2	5	I	CC(C1COC(C2=CC=C[C-]2P(C3=CC=CC=C3)C4=CC=CC=C4)=N1)C.[CH-]5C=CC=C5.[Fe+2]	10	KOH	THF	reflux	17	50
CO110	Table 1	2	O=C(OC1C=CCCC1)C	Br[Mg]C1=CC=CC=C1	C1(C2=CC=CC=C2)C=CCCC1	Ni(acac)2	5	I	CC(C1COC(C2=CC=C[C-]2P(C3=CC=CC=C3)C4=CC=CC=C4)=N1)C.[CH-]5C=CC=C5.[Fe+2]	10	N/A	THF	25	17	97
CO110	Table 1	5	O=C(OC1C=CCCC1)OC	Br[Mg]C1=CC=CC=C1	C1(C2=CC=CC=C2)C=CCCC1	Ni(acac)2	5	I	CC(C1COC(C2=CC=C[C-]2P(C3=CC=CC=C3)C4=CC=CC=C4)=N1)C.[CH-]5C=CC=C5.[Fe+2]	10	N/A	THF	25	17	79
CO110	Table 1	6	COC1C=CCCC1	Br[Mg]C1=CC=CC=C1	C1(C2=CC=CC=C2)C=CCCC1	Ni(acac)2	5	I	CC(C1COC(C2=CC=C[C-]2P(C3=CC=CC=C3)C4=CC=CC=C4)=N1)C.[CH-]5C=CC=C5.[Fe+2]	10	N/A	THF	25	17	93
CO110	Table 1	8	C1(OC2=CC=CC=C2)C=CCCC1	Br[Mg]C1=CC=CC=C1	C1(C2=CC=CC=C2)C=CCCC1	Ni(acac)2	5	I	CC(C1COC(C2=CC=C[C-]2P(C3=CC=CC=C3)C4=CC=CC=C4)=N1)C.[CH-]5C=CC=C5.[Fe+2]	10	N/A	THF	25	17	98
CO110	Table 2	2	COC1C=CCCC1	Cl[Mg]C1=CC=CC=C1	C1(C2=CC=CC=C2)C=CCCC1	Ni(acac)2	5	II	CC(C1COC(C2=CC=C[C-]2P(C3=CC=CC=C3)C4=CC=CC=C4)=N1)(C)C.[CH-]5C=CC=C5.[Fe+2]	10	N/A	THF	25	17	74
CO110	Table 2	3	COC1C=CCCC1	Cl[Mg]C1=CC=CC=C1	C1(C2=CC=CC=C2)C=CCCC1	Ni(acac)2	5	III	C1(P(C2=CC=CC=C2)[C-]3C=CC=C3C4=NC(CC5=CC=CC=C5)CO4)=CC=CC=C1.[CH-]6C=CC=C6.[Fe+2]	10	N/A	THF	25	17	100
CO110	Table 2	4	COC1C=CCCC1	Cl[Mg]C1=CC=CC=C1	C1(C2=CC=CC=C2)C=CCCC1	Ni(acac)2	5	IV	C1(P(C2=CC=CC=C2)[C-]3C=CC=C3C4=NC(C5=CC=CC=C5)CO4)=CC=CC=C1.[CH-]6C=CC=C6.[Fe+2]	10	N/A	THF	25	17	94
CO110	Table 2	5	COC1C=CCCC1	Cl[Mg]C1=CC=CC=C1	C1(C2=CC=CC=C2)C=CCCC1	Ni(acac)2	5	V	C1(P(C2=CC=CC=C2)[C-]3C=CC=C3C4=NC(C5=CC=CC=C5)C(C6=CC=CC=C6)O4)=CC=CC=C1.[CH-]7C=CC=C7.[Fe+2]	10	N/A	THF	25	17	80
CO110	Table 2	6	COC1C=CCCC1	Cl[Mg]C1=CC=CC=C1	C1(C2=CC=CC=C2)C=CCCC1	Ni(acac)2	5	VI	CC(C(CO1)N=C1C2=CC=CC=C2P(C3=CC=CC=C3)C4=CC=CC=C4)C	10	N/A	THF	25	17	91
CO111	Table 1	6	CC(C1=CC=C(OC)C=C1)(C)C	C[Si](C)(C[Mg]Cl)C	CC(C1=CC=C(C[Si](C)(C)C)C=C1)(C)C	Ni(OAc)2	5	ICy	C1(N2[C]N(C=C2)C3CCCCC3)CCCCC1	10	N/A	toluene	25	18	62
CO112	Scheme 4	(b)	COC1=CC2=CC=CC=C2C=C1	CC(CO1)(C)COB1C2=CC=CC=C2	C12=CC=CC=C1C=C(C3=CC=CC=C3)C=C2	Ni(COD)2	10	ICy	C1(N2[C]N(C=C2)C3CCCCC3)CCCCC1	20	N/A	toluene	120	12	72
CO113	Table 1	4	O=C(OC1=CC2=CC=CC=C2C=C1)N(C)C	FC1=CC(F)=C(F)C(F)=C1F	FC1=C(C2=CC(C=CC=C3)=C3C=C2)C(F)=C(F)C(F)=C1F	Ni(COD)2	10	dcype	P(CCP(C1CCCCC1)C2CCCCC2)(C3CCCCC3)C4CCCCC4	20	N/A	toluene	120	12	65
CO114	Table 2	5	COC1=CC=C(OS(C2=CC=C(C)C=C2)(=O)=O)C=C1	OB(O)C1=CC=CC=C1	COC1=CC=C(C2=CC=CC=C2)C=C1	6	2	6	CC(P(NC1=NC=NC(NP(C(C)C)C(C)C)=N1)C(C)C)C	2	KOtBu	toluene	135	16	87
CO114	Table 2	6	COC1=CC=C(OS(C2=CC=C(C)C=C2)(=O)=O)C=C1	OB(O)C1=CC=CC=C1	COC1=CC=C(C2=CC=CC=C2)C=C1	6	2	6	CC(P(NC1=NC=NC(NP(C(C)C)C(C)C)=N1)C(C)C)C	2	K3PO4	toluene	135	16	81
CO114	Table 2	7	COC1=CC=C(OS(C)(=O)=O)C=C1	OB(O)C1=CC=CC=C1	COC1=CC=C(C2=CC=CC=C2)C=C1	6	2	6	CC(P(NC1=NC=NC(NP(C(C)C)C(C)C)=N1)C(C)C)C	2	K3PO4	toluene	135	16	75
CO114	Table 2	8	COC1=CC=C(OS(=O)(C(F)(F)F)=O)C=C1	OB(O)C1=CC=CC=C1	COC1=CC=C(C2=CC=CC=C2)C=C1	6	2	6	CC(P(NC1=NC=NC(NP(C(C)C)C(C)C)=N1)C(C)C)C	2	KOtBu	toluene	135	16	92
CO114	Table 2	9	COC1=CC=C(OC(N(CC)CC)=O)C=C1	OB(O)C1=CC=CC=C1	COC1=CC=C(C2=CC=CC=C2)C=C1	6	2	6	CC(P(NC1=NC=NC(NP(C(C)C)C(C)C)=N1)C(C)C)C	2	K3PO4	toluene	135	16	84
CO114	Table 2	10	COC1=CC=C(OC(C(C)(C)C)=O)C=C1	OB(O)C1=CC=CC=C1	COC1=CC=C(C2=CC=CC=C2)C=C1	6	2	6	CC(P(NC1=NC=NC(NP(C(C)C)C(C)C)=N1)C(C)C)C	2	K3PO4	toluene	135	16	51
CO114	Table 3	4	CCCCOS(C1=CC=C(C)C=C1)(=O)=O	FB(C1=CC=CC=C1)(F)F.[K]	CCCCC1=CC=CC=C1	6	2	6	CC(P(NC1=NC=NC(NP(C(C)C)C(C)C)=N1)C(C)C)C	2	KOtBu	toluene	135	16	76
CO114	Table 3	5	CCCCOS(C1=CC=C(C)C=C1)(=O)=O	FB(C1=CC=CC=C1)(F)F.[K]	CCCCC1=CC=CC=C1	6	2	6	CC(P(NC1=NC=NC(NP(C(C)C)C(C)C)=N1)C(C)C)C	2	K3PO4	toluene	135	16	71
CO114	Table 3	6	CCCCOS(=O)(C(F)(F)F)=O	FB(C1=CC=CC=C1)(F)F.[K]	CCCCC1=CC=CC=C1	6	2	6	CC(P(NC1=NC=NC(NP(C(C)C)C(C)C)=N1)C(C)C)C	2	KOtBu	toluene	135	16	87
CO114	Table 3	7	CCCCOS(=O)(C(F)(F)F)=O	FB(C1=CC=CC=C1)(F)F.[K]	CCCCC1=CC=CC=C1	6	2	6	CC(P(NC1=NC=NC(NP(C(C)C)C(C)C)=N1)C(C)C)C	2	K3PO4	toluene	135	16	90
CO114	Table 3	10	O=S(OCC1=CC=CC=C1)(C(F)(F)F)=O	FB(C1=CC=CC=C1)(F)F.[K]	C1(CC2=CC=CC=C2)=CC=CC=C1	6	2	6	CC(P(NC1=NC=NC(NP(C(C)C)C(C)C)=N1)C(C)C)C	2	K3PO4	toluene	135	16	63
CO114	Table 3	11	C=CCOS(=O)(C(F)(F)F)=O	FB(C1=CC=CC=C1)(F)F.[K]	C=CCC1=CC=CC=C1	6	2	6	CC(P(NC1=NC=NC(NP(C(C)C)C(C)C)=N1)C(C)C)C	2	K3PO4	toluene	135	16	42
CO115	Table 1	1	O=C(C)C1=CC=C(OS(C2=CC=C(C)C=C2)(=O)=O)C=C1	OB(O)C1=CC=CC=C1	O=C(C)C1=CC=C(C2=CC=CC=C2)C=C1	NiCl2(PCy3)2	1.5	PCy3	P(C1CCCCC1)(C2CCCCC2)C3CCCCC3	9	K3PO4	dioxane	130	60	94
CO116	Table 3	3	O=S(OC1=CC=CC=C1)(N(C)C)=O	CC1=CC=C([Mg]Br)C=C1	CC1=CC=C(C2=CC=CC=C2)C=C1	NiCl2	10	PtBu3	CC(P(C(C)(C)C)C(C)(C)C)(C)C	20	N/A	toluene	120	24	63
CO116	Table 3	4	O=S(OC1=CC=CC=C1)(N(C)C)=O	CC1=CC=C([Mg]Br)C=C1	CC1=CC=C(C2=CC=CC=C2)C=C1	NiCl2	10	dppf	C1=CC=C(C=C1)P([C-]2C=CC=C2)C3=CC=CC=C3.C1=CC=C(C=C1)P([C-]2C=CC=C2)C3=CC=CC=C3.[Fe+2]	20	N/A	toluene	120	24	74
CO116	Table 3	5	O=S(OC1=CC=CC=C1)(N(C)C)=O	CC1=CC=C([Mg]Br)C=C1	CC1=CC=C(C2=CC=CC=C2)C=C1	NiClCpPPh3	10	PPh3	P(C1=CC=CC=C1)(C2=CC=CC=C2)C3=CC=CC=C3	10	N/A	Et2O	40	24	83
CO116	Table 3	6	O=S(OC1=CC=CC=C1)(N(C)C)=O	CC1=CC=C([Mg]Br)C=C1	CC1=CC=C(C2=CC=CC=C2)C=C1	NiClCpPPh3	10	PPh3	P(C1=CC=CC=C1)(C2=CC=CC=C2)C3=CC=CC=C3	10	N/A	toluene	120	24	91
CO116	Table 3	7	O=S(OC1=CC=CC=C1)(N(C)C)=O	CC1=CC=C([Mg]Br)C=C1	CC1=CC=C(C2=CC=CC=C2)C=C1	NiClCpIMes	10	IMes	CC1=C(N2C=CN(C3=C(C)C=C(C)C=C3C)[C]2)C(C)=CC(C)=C1	10	N/A	THF	40	24	83
CO116	Table 3	8	O=S(OC1=CC=CC=C1)(N(C)C)=O	CC1=CC=C([Mg]Br)C=C1	CC1=CC=C(C2=CC=CC=C2)C=C1	NiClCpIMes	10	IMes	CC1=C(N2C=CN(C3=C(C)C=C(C)C=C3C)[C]2)C(C)=CC(C)=C1	10	N/A	toluene	40	24	85
CO116	Table 3	9	O=S(OC1=CC=CC=C1)(N(C)C)=O	CC1=CC=C([Mg]Br)C=C1	CC1=CC=C(C2=CC=CC=C2)C=C1	NiClCpIMes	10	IMes	CC1=C(N2C=CN(C3=C(C)C=C(C)C=C3C)[C]2)C(C)=CC(C)=C1	10	N/A	Et2O	40	24	99
CO117	Table 1	1	CS(OC1=CC=CC2=CC=CC=C21)(=O)=O	FB(C1=COC=C1)(F)F.[K]	C12=CC=CC=C1C(C3=COC=C3)=CC=C2	Ni(COD)2	10	PCy3	P(C1CCCCC1)(C2CCCCC2)C3CCCCC3	20	K3PO4	tBuOH/H2O	110	4	100
CO117	Table 1	2	CC1=CC=C(S(OC2=CC=CC3=CC=CC=C32)(=O)=O)C=C1	FB(C1=COC=C1)(F)F.[K]	C12=CC=CC=C1C(C3=COC=C3)=CC=C2	Ni(COD)2	10	PCy3	P(C1CCCCC1)(C2CCCCC2)C3CCCCC3	20	K3PO4	tBuOH/H2O	110	4	85
CO117	Table 1	3	O=S(OC1=CC=CC2=CC=CC=C21)(N(C)C)=O	FB(C1=COC=C1)(F)F.[K]	C12=CC=CC=C1C(C3=COC=C3)=CC=C2	Ni(COD)2	10	PCy3	P(C1CCCCC1)(C2CCCCC2)C3CCCCC3	20	K3PO4	tBuOH/H2O	110	4	85
CO117	Table 1	4	CC(C)(C)C(OC1=CC=CC2=CC=CC=C21)=O	FB(C1=COC=C1)(F)F.[K]	C12=CC=CC=C1C(C3=COC=C3)=CC=C2	Ni(COD)2	10	PCy3	P(C1CCCCC1)(C2CCCCC2)C3CCCCC3	20	K3PO4	tBuOH/H2O	110	4	68
CO117	Table 1	5	CC(OC(OC1=CC=CC2=CC=CC=C21)=O)(C)C	FB(C1=COC=C1)(F)F.[K]	C12=CC=CC=C1C(C3=COC=C3)=CC=C2	Ni(COD)2	10	PCy3	P(C1CCCCC1)(C2CCCCC2)C3CCCCC3	20	K3PO4	tBuOH/H2O	110	4	59
CO117	Table 1	6	O=C(OC1=CC=CC2=CC=CC=C21)N(CC)CC	FB(C1=COC=C1)(F)F.[K]	C12=CC=CC=C1C(C3=COC=C3)=CC=C2	Ni(COD)2	10	PCy3	P(C1CCCCC1)(C2CCCCC2)C3CCCCC3	20	K3PO4	tBuOH/H2O	110	4	55
CO118	Table 1	1	O=C(N(C(C1=CC=C(C)C=C1)OC)CC2=CC=CC=C2)C3=CC=CC=C3	N/A	O=C1C2=CC=CC=C2C(C3=CC=C(C)C=C3)N1CC4=CC=CC=C4	NiCl2•DME	10	P(o-tolyl)3	CC1=C(P(C2=C(C)C=CC=C2)C3=C(C)C=CC=C3)C=CC=C1	22	N/A	toluene	110	4	60
CO118	Table 1	6	O=C(N(C(C1=CC=C(C)C=C1)OC)CC2=CC=CC=C2)C3=CC=CC=C3	N/A	O=C1C2=CC=CC=C2C(C3=CC=C(C)C=C3)N1CC4=CC=CC=C4	Ni(COD)2	10	dppf	C1=CC=C(C=C1)P([C-]2C=CC=C2)C3=CC=CC=C3.C1=CC=C(C=C1)P([C-]2C=CC=C2)C3=CC=CC=C3.[Fe+2]	12	N/A	toluene	110	5	60
CO118	Table 1	7	O=C(N(C(C1=CC=C(C)C=C1)OC)CC2=CC=CC=C2)C3=CC=CC=C3	N/A	O=C1C2=CC=CC=C2C(C3=CC=C(C)C=C3)N1CC4=CC=CC=C4	Ni(COD)2	10	dppf	C1=CC=C(C=C1)P([C-]2C=CC=C2)C3=CC=CC=C3.C1=CC=C(C=C1)P([C-]2C=CC=C2)C3=CC=CC=C3.[Fe+2]	12	N/A	toluene	95	24	67
CO118	Table 1	8	O=C(N(C(C1=CC=C(C)C=C1)OC)CC2=CC=CC=C2)C3=CC=CC=C3	N/A	O=C1C2=CC=CC=C2C(C3=CC=C(C)C=C3)N1CC4=CC=CC=C4	Ni(COD)2	5	dppf	C1=CC=C(C=C1)P([C-]2C=CC=C2)C3=CC=CC=C3.C1=CC=C(C=C1)P([C-]2C=CC=C2)C3=CC=CC=C3.[Fe+2]	6	N/A	toluene	95	24	61
CO118	Table 1	9	O=C(N(C(C1=CC=C(C)C=C1)OC)CC2=CC=CC=C2)C3=CC=CC=C3	N/A	O=C1C2=CC=CC=C2C(C3=CC=C(C)C=C3)N1CC4=CC=CC=C4	Ni(COD)2	20	dppf	C1=CC=C(C=C1)P([C-]2C=CC=C2)C3=CC=CC=C3.C1=CC=C(C=C1)P([C-]2C=CC=C2)C3=CC=CC=C3.[Fe+2]	22	N/A	toluene	95	24	74
CO118	Table 1	10	O=C(N(C(C1=CC=C(C)C=C1)OC)CC2=CC=CC=C2)C3=CC=CC=C3	N/A	O=C1C2=CC=CC=C2C(C3=CC=C(C)C=C3)N1CC4=CC=CC=C4	Ni(COD)2	10	BINAP	C1(C2=C3C=CC=CC3=CC=C2P(C4=CC=CC=C4)C5=CC=CC=C5)=C6C=CC=CC6=CC=C1P(C7=CC=CC=C7)C8=CC=CC=C8	12	N/A	toluene	95	24	56
CO119	Table 1	6	CC(C)(C)C(OC1=CC2=CC=CC=C2C=C1)=O	C=CC1=CC=CC=C1	C12=CC=CC=C1C=C(/C=C/C3=CC=CC=C3)C=C2	Ni(COD)2	10	dppf	C1=CC=C(C=C1)P([C-]2C=CC=C2)C3=CC=CC=C3.C1=CC=C(C=C1)P([C-]2C=CC=C2)C3=CC=CC=C3.[Fe+2]	12	K3PO4	toluene	110	24	40
CO119	Table 1	7	CC(C)(C)C(OC1=CC2=CC=CC=C2C=C1)=O	C=CC1=CC=CC=C1	C12=CC=CC=C1C=C(/C=C/C3=CC=CC=C3)C=C2	Ni(COD)2	10	dppf	C1=CC=C(C=C1)P([C-]2C=CC=C2)C3=CC=CC=C3.C1=CC=C(C=C1)P([C-]2C=CC=C2)C3=CC=CC=C3.[Fe+2]	12	K3PO4	toluene	125	24	56
CO119	Table 1	10	CC(C)(C)C(OC1=CC2=CC=CC=C2C=C1)=O	C=CC1=CC=CC=C1	C12=CC=CC=C1C=C(/C=C/C3=CC=CC=C3)C=C2	Ni(COD)2	10	dppf	C1=CC=C(C=C1)P([C-]2C=CC=C2)C3=CC=CC=C3.C1=CC=C(C=C1)P([C-]2C=CC=C2)C3=CC=CC=C3.[Fe+2]	12	K3PO4	toluene	125	24	99
CO119	Table 1	11	CC(C)(C)C(OC1=CC2=CC=CC=C2C=C1)=O	C=CC1=CC=CC=C1	C12=CC=CC=C1C=C(/C=C/C3=CC=CC=C3)C=C2	Ni(COD)2	10	dppf	C1=CC=C(C=C1)P([C-]2C=CC=C2)C3=CC=CC=C3.C1=CC=C(C=C1)P([C-]2C=CC=C2)C3=CC=CC=C3.[Fe+2]	6	K3PO4	toluene	125	24	84
CO120	Figure 2	2	CCOC1OC2=CC=CC=C2C=C1	FC1=CC=C(B(O)O)C=C1	FC(C=C1)=CC=C1C2OC3=CC=CC=C3C=C2	Ni(COD)2	10	PPh3	P(C1=CC=CC=C1)(C2=CC=CC=C2)C3=CC=CC=C3	10	N/A	dioxane/tAmOH	40	4	92
CO121	Table 1	4	COCCOC(C1=CC=CC=C1)C2=CC=CC=C2	C[Mg]I	CC(C1=CC=CC=C1)C2=CC=CC=C2	Ni(COD)2	5	DPEPhos	C1(P(C2=CC=CC=C2)C3=CC=CC=C3)=CC=CC=C1OC4=CC=CC=C4P(C5=CC=CC=C5)C6=CC=CC=C6	10	N/A	toluene	22	24	60
CO121	Table 1	7	COCCOC(C1=CC=CC=C1)C2=CC=CC=C2	C[Mg]I	CC(C1=CC=CC=C1)C2=CC=CC=C2	Ni(acac)2	5	DPEPhos	C1(P(C2=CC=CC=C2)C3=CC=CC=C3)=CC=CC=C1OC4=CC=CC=C4P(C5=CC=CC=C5)C6=CC=CC=C6	10	N/A	toluene	22	24	73
CO121	Table 1	8	COCCOC(C1=CC=CC=C1)C2=CC=CC=C2	C[Mg]I	CC(C1=CC=CC=C1)C2=CC=CC=C2	Ni(acac)2	5	DPEPhos	C1(P(C2=CC=CC=C2)C3=CC=CC=C3)=CC=CC=C1OC4=CC=CC=C4P(C5=CC=CC=C5)C6=CC=CC=C6	10	N/A	toluene	22	48	80
CO122	Table 3	1	COC1=CC2=CC=CC=C2C=C1	Br[Mg]C1=CC=CC=C1	C12=CC=CC=C1C=C(C3=CC=CC=C3)C=C2	(IPr)Ni(allyl)Cl	5	IPr	CC(C)C(C=CC=C1C(C)C)=C1N2[C]N(C3=C(C(C)C)C=CC=C3C(C)C)C=C2	5	N/A	THF	60	24	82
CO123	Scheme 3	N/A	O=C(OC1=CC(C2=CC=CC=C2)=CC(OC)=C1)N(CC)CC	CC1=CC=C(C=C1)B2OB(OB(O2)C3=CC=C(C=C3)C)C4=CC=C(C=C4)C	O=C(N(CC)CC)OC1=CC(C2=CC=CC=C2)=CC(C3=CC=C(C)C=C3)=C1	NiCl2(PCy3)2	5	PCy3	P(C1CCCCC1)(C2CCCCC2)C3CCCCC3	20	K2CO3	dioxane	120	24	81
CO123	Table 1	1	COC1=CC(C2=CC=CC=C2)=CC(C3=CC=CC=C3)=C1	Br[Mg]C1=CC=CC=C1	C1(C2=CC=CC=C2)=CC(C3=CC=CC=C3)=CC(C4=CC=CC=C4)=C1	NiCl2(PCy3)2	15	PCy3	P(C1CCCCC1)(C2CCCCC2)C3CCCCC3	30	N/A	toluene	130	24	72
CO124	Table 2	1	O=S(OC1=CC=CC2=CC=CC=C21)(N(C)C)=O	OB(O)C1=CC=CC=C1	C12=CC=CC=C1C(C3=CC=CC=C3)=CC=C2	NiCl2(PCy3)2	5	PCy3	P(C1CCCCC1)(C2CCCCC2)C3CCCCC3	10	K3PO4	tAmOH	100	12	100
CO124	Table 2	2	O=C(OC1=CC=CC2=CC=CC=C21)N(CC)CC	OB(O)C1=CC=CC=C1	C12=CC=CC=C1C(C3=CC=CC=C3)=CC=C2	NiCl2(PCy3)2	5	PCy3	P(C1CCCCC1)(C2CCCCC2)C3CCCCC3	10	K3PO4	tAmOH	100	12	57
CO124	Table 2	3	CC(C)(C)C(OC1=CC=CC2=CC=CC=C21)=O	OB(O)C1=CC=CC=C1	C12=CC=CC=C1C(C3=CC=CC=C3)=CC=C2	NiCl2(PCy3)2	5	PCy3	P(C1CCCCC1)(C2CCCCC2)C3CCCCC3	10	K3PO4	2-Me-THF	100	12	100
CO124	Table 2	4	CS(OC1=CC=CC2=CC=CC=C21)(=O)=O	OB(O)C1=CC=CC=C1	C12=CC=CC=C1C(C3=CC=CC=C3)=CC=C2	NiCl2(PCy3)2	5	PCy3	P(C1CCCCC1)(C2CCCCC2)C3CCCCC3	10	K3PO4	tAmOH	100	12	97
CO124	Table 2	5	CC1=CC=C(S(OC2=CC=CC3=CC=CC=C32)(=O)=O)C=C1	OB(O)C1=CC=CC=C1	C12=CC=CC=C1C(C3=CC=CC=C3)=CC=C2	NiCl2(PCy3)2	5	PCy3	P(C1CCCCC1)(C2CCCCC2)C3CCCCC3	10	K3PO4	tAmOH	100	12	100
CO124	Table 2	6	O=S(OC1=CC=CC2=CC=CC=C21)(C(F)(F)F)=O	OB(O)C1=CC=CC=C1	C12=CC=CC=C1C(C3=CC=CC=C3)=CC=C2	NiCl2(PCy3)2	5	PCy3	P(C1CCCCC1)(C2CCCCC2)C3CCCCC3	10	K3PO4	tAmOH	100	12	100
CO125	Table 1	2	O=C(OCC)N1C2=CC=CC=C2C=CC1OCC	OB(O)C1=CC=CC=C1	O=C(OCC)N1C2=CC=CC=C2C=CC1C3=CC=CC=C3	Ni(COD)2	5	L1	CN(P1OC2=C(C3=C(C=CC=C4)C4=CC=C3O1)C5=CC=CC=C5C=C2)C	9	N/A	dioxane/tAmOH	25	24	97
CO125	Table 1	3	O=C(OCC)N1C2=CC=CC=C2C=CC1OCC	OB(O)C1=CC=CC=C1	O=C(OCC)N1C2=CC=CC=C2C=CC1C3=CC=CC=C3	Ni(COD)2	5	L2	CN(P1OC2=C(C3=C(C=CC=C4)C4=CC(C5=CC=CC=C5)=C3O1)C6=CC=CC=C6C=C2C7=CC=CC=C7)C	9	N/A	dioxane/tAmOH	25	24	62
CO125	Table 1	4	O=C(OCC)N1C2=CC=CC=C2C=CC1OCC	OB(O)C1=CC=CC=C1	O=C(OCC)N1C2=CC=CC=C2C=CC1C3=CC=CC=C3	Ni(COD)2	5	L3	CN(P1OC2=C(C3=C(C=CC=C4)C4=CC(C5=C(CN)C=CC=C5)=C3O1)C6=CC=CC=C6C=C2C7=CC=CC=C7CN)C	9	N/A	dioxane/tAmOH	25	24	94
CO125	Table 1	10	O=C(OCC)N1C2=CC=CC=C2C=CC1OCC	OB(O)C1=CC=CC=C1	O=C(OCC)N1C2=CC=CC=C2C=CC1C3=CC=CC=C3	[(methallyl)NiCl]2	5	L4	CN(P1OC2=C(C3=C(C=CC=C4)C4=CC(C5=C(CN)C=CC=C5)=C3O1)C6=CC=CC=C6C=C2C7=CC=CC=C7CN)C	9	N/A	dioxane/tAmOH	25	24	56
CO125	Table 1	14	O=C(OCC)N1C2=CC=CC=C2C=CC1OCC	OB(O)C1=CC=CC=C1	O=C(OCC)N1C2=CC=CC=C2C=CC1C3=CC=CC=C3	[(methallyl)NiCl]2	5	L7	CC(O1)(C)O[C@@H]2[C@@H]1C(C3=CC(C=CC=C4)=C4C=C3)(C5=CC=C(C=CC=C6)C6=C5)OP(C7=CC=CC=C7)OC2(C8=CC(C=CC=C9)=C9C=C8)C%10=CC=C(C=CC=C%11)C%11=C%10	9	N/A	dioxane/tAmOH	25	24	89
CO126	Table 1	3	CC(OC(C(C)(C)C)=O)/C=C/C1=CC=CC=C1	B1(C2=CC=CC=C2)OB(C3=CC=CC=C3)OB(C4=CC=CC=C4)O1	CC(C1=CC=CC=C1)/C=C/C2=CC=CC=C2	Ni(COD)2	10	dppp	P(CCCP(C1=CC=CC=C1)C2=CC=CC=C2)(C3=CC=CC=C3)C4=CC=CC=C4	11	NaOMe	CH3CN	25	4	90
CO126	Table 1	5	CC(OC(C(C)(C)C)=O)/C=C/C1=CC=CC=C1	B1(C2=CC=CC=C2)OB(C3=CC=CC=C3)OB(C4=CC=CC=C4)O1	CC(C1=CC=CC=C1)/C=C/C2=CC=CC=C2	Ni(COD)2	10	PCy3	P(C1CCCCC1)(C2CCCCC2)C3CCCCC3	22	NaOMe	CH3CN	25	4	80
CO126	Table 1	6	CC(OC(C(C)(C)C)=O)/C=C/C1=CC=CC=C1	B1(C2=CC=CC=C2)OB(C3=CC=CC=C3)OB(C4=CC=CC=C4)O1	CC(C1=CC=CC=C1)/C=C/C2=CC=CC=C2	Ni(COD)2	10	PPh2Cy	P(C1CCCCC1)(C2CCCCC2)C3=CC=CC=C3	22	NaOMe	CH3CN	25	4	83
CO126	Table 1	7	CC(OC(C(C)(C)C)=O)/C=C/C1=CC=CC=C1	B1(C2=CC=CC=C2)OB(C3=CC=CC=C3)OB(C4=CC=CC=C4)O1	CC(C1=CC=CC=C1)/C=C/C2=CC=CC=C2	Ni(COD)2	10	PPh2Bn	P(C1=CC=CC=C1)(CC2=CC=CC=C2)C3=CC=CC=C3	22	NaOMe	CH3CN	25	4	85
CO126	Table 1	8	CC(OC(C(C)(C)C)=O)/C=C/C1=CC=CC=C1	B1(C2=CC=CC=C2)OB(C3=CC=CC=C3)OB(C4=CC=CC=C4)O1	CC(C1=CC=CC=C1)/C=C/C2=CC=CC=C2	Ni(COD)2	10	PPh2Bn	P(C1=CC=CC=C1)(CC2=CC=CC=C2)C3=CC=CC=C3	22	NaOMe	CH3CN	25	4	90
CO126	Table 1	9	CC(OC(C(C)(C)C)=O)/C=C/C1=CC=CC=C1	B1(C2=CC=CC=C2)OB(C3=CC=CC=C3)OB(C4=CC=CC=C4)O1	CC(C1=CC=CC=C1)/C=C/C2=CC=CC=C2	Ni(COD)2	5	PPh2Bn	P(C1=CC=CC=C1)(CC2=CC=CC=C2)C3=CC=CC=C3	11	NaOMe	CH3CN	25	4	90
CO126	Table 1	10	CC(OC(C(C)(C)C)=O)/C=C/C1=CC=CC=C1	B1(C2=CC=CC=C2)OB(C3=CC=CC=C3)OB(C4=CC=CC=C4)O1	CC(C1=CC=CC=C1)/C=C/C2=CC=CC=C2	Ni(COD)2	2	PPh2Bn	P(C1=CC=CC=C1)(CC2=CC=CC=C2)C3=CC=CC=C3	5	NaOMe	CH3CN	25	4	92
CO126	Table 1	11	CC(OC(C(C)(C)C)=O)/C=C/C1=CC=CC=C1	B1(C2=CC=CC=C2)OB(C3=CC=CC=C3)OB(C4=CC=CC=C4)O1	CC(C1=CC=CC=C1)/C=C/C2=CC=CC=C2	Ni(COD)2	2	PPh2Bn	P(C1=CC=CC=C1)(CC2=CC=CC=C2)C3=CC=CC=C3	5	NaOMe	CH3CN	25	4	72
CO126	Table 1	12	CC(OC(C(C)(C)C)=O)/C=C/C1=CC=CC=C1	B1(C2=CC=CC=C2)OB(C3=CC=CC=C3)OB(C4=CC=CC=C4)O1	CC(C1=CC=CC=C1)/C=C/C2=CC=CC=C2	Ni(COD)2	2	PPh2Bn	P(C1=CC=CC=C1)(CC2=CC=CC=C2)C3=CC=CC=C3	5	NaOMe	CH3CN	25	4	86
CO127	Scheme 3	N/A	O=P(OC/C=C/C1=CC=CC=C1)(OCC)OCC	CC1=C(C(NC2=C(N=CC=C3)C3=CC=C2)=O)C=CC=C1	CC1=C(C(NC2=C(N=CC=C3)C3=CC=C2)=O)C(/C=C/C)=CC=C1	Ni(COD)2	10	PCy3	P(C1CCCCC1)(C2CCCCC2)C3CCCCC3	20	Na2CO3	toluene	140	30	93
CO128	Table 1	8	COCC1=CC=C(C2=CC=CC=C2)C=C1	CC1=CC=C(B2OCC(C)(C)CO2)C=C1	CC(C=C1)=CC=C1CC2=CC=C(C3=CC=CC=C3)C=C2	Ni(COD)2	10	ICy	C1(N2[C]N(C=C2)C3CCCCC3)CCCCC1	20	CsF	toluene	120	10	67
CO129	Scheme 2	N/A	O=S(OC1=C(OC)C=CC=C1)(N(C)C)=O	CC(CO1)(C)COB1C2=CC=C(C(OC)=O)C=C2	COC1=C(C2=CC=C(C(OC)=O)C=C2)C=CC=C1	Ni(COD)2	5	PCy3	P(C1CCCCC1)(C2CCCCC2)C3CCCCC3	20	K3PO4	THF	23	1	92
CO130	Scheme 1	N/A	COC1=CC2=CC=CC=C2C=C1	CC([Si](C#C[Mg]Br)(C(C)C)C(C)C)C	CC([Si](C#CC1=CC2=CC=CC=C2C=C1)(C(C)C)C(C)C)C	Ni(COD)2	10	ICy	C1(N2[C]N(C=C2)C3CCCCC3)CCCCC1	20	N/A	dioxane	120	18	94
CO131	Table 2	14	O=S(OC1=CC=C(C#N)C=C1)(C(F)(F)F)=O	CN1CCC([Zn]([Li])(Cl)Cl)CC1	CN1CCC(C2=CC=C(C#N)C=C2)CC1	Ni(acac)2	2.5	DPEPhos	C1(P(C2=CC=CC=C2)C3=CC=CC=C3)=CC=CC=C1OC4=CC=CC=C4P(C5=CC=CC=C5)C6=CC=CC=C6	5	N/A	THF/NMP	25	8	95
CO132	Table 1	1	CO/C=C\C1=CC=CC=C1	CC1=CC=C(B2OCC(C)(C)CO2)C=C1	CC(C=C1)=CC=C1/C=C\C2=CC=CC=C2	Ni(COD)2	10	PCy3	P(C1CCCCC1)(C2CCCCC2)C3CCCCC3	40	CsF	toluene	80	2	90
CO132	Table 1	2	CO/C=C\C1=CC=CC=C1	CC1=CC=C(B2OCC(C)(C)CO2)C=C1	CC(C=C1)=CC=C1/C=C\C2=CC=CC=C2	Ni(COD)2	10	PCy3	P(C1CCCCC1)(C2CCCCC2)C3CCCCC3	40	CsF	toluene	80/120	26	87
CO132	Table 1	3	CO/C=C\C1=CC=CC=C1	CC1=CC=C(B2OCC(C)(C)CO2)C=C1	CC(C=C1)=CC=C1/C=C\C2=CC=CC=C2	Ni(COD)2	10	PCy3	P(C1CCCCC1)(C2CCCCC2)C3CCCCC3	40	CsF	toluene	60	12	92
CO132	Table 1	4	CO/C=C\C1=CC=CC=C1	CC1=CC=C(B2OCC(C)(C)CO2)C=C1	CC(C=C1)=CC=C1/C=C\C2=CC=CC=C2	Ni(COD)2	10	PCy3	P(C1CCCCC1)(C2CCCCC2)C3CCCCC3	40	CsF	toluene	50	12	64
CO133	Table 1	1	CC1=CC=C(OS(C2=CC=C(C)C=C2)(=O)=O)C=C1	Br[Mg]C1=CC=CC=C1	CC1=CC=C(C2=CC=CC=C2)C=C1	NiCl2(PCy3)2	5	PCy3	P(C1CCCCC1)(C2CCCCC2)C3CCCCC3	20	N/A	THF	25	2	89
CO133	Table 1	2	CC1=CC=C(OS(C2=CC=C(C)C=C2)(=O)=O)C=C1	Br[Mg]C1=CC=CC=C1	CC1=CC=C(C2=CC=CC=C2)C=C1	NiCl2(PCy3)2	5	PCy3	P(C1CCCCC1)(C2CCCCC2)C3CCCCC3	20	N/A	THF	70	2	99
CO133	Table 1	3	CC1=CC=C(OS(C2=CC=C(C)C=C2)(=O)=O)C=C1	Br[Mg]C1=CC=CC=C1	CC1=CC=C(C2=CC=CC=C2)C=C1	NiCl2(PCy3)2	5	PCy3	P(C1CCCCC1)(C2CCCCC2)C3CCCCC3	20	N/A	toluene	25	2	76
CO133	Table 1	4	CC1=CC=C(OS(C2=CC=C(C)C=C2)(=O)=O)C=C1	Br[Mg]C1=CC=CC=C1	CC1=CC=C(C2=CC=CC=C2)C=C1	NiCl2(PCy3)2	5	PCy3	P(C1CCCCC1)(C2CCCCC2)C3CCCCC3	20	N/A	Et2O	25	2	99
CO133	Table 1	6	CC1=CC=C(OS(C2=CC=C(C)C=C2)(=O)=O)C=C1	Br[Mg]C1=CC=CC=C1	CC1=CC=C(C2=CC=CC=C2)C=C1	NiCl2(PCy3)2	5	PCy3	P(C1CCCCC1)(C2CCCCC2)C3CCCCC3	10	N/A	Et2O	25	2	81
CO133	Table 1	11	CC1=CC=C(OS(C2=CC=C(C)C=C2)(=O)=O)C=C1	Br[Mg]C1=CC=CC=C1	CC1=CC=C(C2=CC=CC=C2)C=C1	Ni(acac)2	5	IMes	CC1=C(N2C=CN(C3=C(C)C=C(C)C=C3C)[C]2)C(C)=CC(C)=C1	10	N/A	Et2O	25	2	42
CO133	Table 1	12	CC1=CC=C(OS(C2=CC=C(C)C=C2)(=O)=O)C=C1	Br[Mg]C1=CC=CC=C1	CC1=CC=C(C2=CC=CC=C2)C=C1	Ni(acac)2	5	IPr	CC(C1=C(N2[C]N(C3=C(C(C)C)C=CC=C3C(C)C)C=C2)C(C(C)C)=CC=C1)C	10	N/A	Et2O	25	2	54
CO134	Scheme 1	N/A	O=C(OC1=CCCCC1)N(CC)CC	B1(OB(OB(O1)C2=CC=CC=C2)C3=CC=CC=C3)C4=CC=CC=C4	C1(C2=CC=CC=C2)=CCCCC1	NiCl2(PCy3)2	5	PCy3	P(C1CCCCC1)(C2CCCCC2)C3CCCCC3	20	K2CO3	dioxane	110	16	85
CO135	Table 4	4	COC1=CC2=CC=CC=C2C=C1	CC1=CC=C([Mg]Br)C=C1	CC1=CC=C(C2=CC(C=CC=C3)=C3C=C2)C=C1	NiBr2(PCy3)(ItBu)	1	PCy3/ItBu	P(C1CCCCC1)(C2CCCCC2)C3CCCCC3/CC(N1C=CN(C(C)(C)C)[C]1)(C)C	2	N/A	THF	25	10	98
CO135	Table 4	5	COC1=CC2=CC=CC=C2C=C1	CC1=CC=C([Mg]Br)C=C1	CC1=CC=C(C2=CC(C=CC=C3)=C3C=C2)C=C1	NiBr2(PCy3)(IPr)	1	PCy3/IPr	P(C1CCCCC1)(C2CCCCC2)C3CCCCC3/CC(C1=C(N2[C]N(C3=C(C(C)C)C=CC=C3C(C)C)C=C2)C(C(C)C)=CC=C1)C	2	N/A	THF	25	10	90
CO135	Table 4	6	COC1=CC2=CC=CC=C2C=C1	CC1=CC=C([Mg]Br)C=C1	CC1=CC=C(C2=CC(C=CC=C3)=C3C=C2)C=C1	NiCl2(PCy3)2	1	PCy3	P(C1CCCCC1)(C2CCCCC2)C3CCCCC3	2	N/A	THF	25	10	82
CO135	Table 4	7	COC1=CC2=CC=CC=C2C=C1	CC1=CC=C([Mg]Br)C=C1	CC1=CC=C(C2=CC(C=CC=C3)=C3C=C2)C=C1	NiBr2(PCy3)2	1	PCy3	P(C1CCCCC1)(C2CCCCC2)C3CCCCC3	2	N/A	THF	25	10	86
CO136	Table 1	1	CC(C)(C)C(OC1=CC=CC=C1OC2=CC=CC=C2)=O	N/A	C12=CC=CC=C1OC3=C2C=CC=C3	Ni(COD)2	12.5	dcype	P(CCP(C1CCCCC1)C2CCCCC2)(C3CCCCC3)C4CCCCC4	25	Cs2CO3	xylene	140	24	41
CO136	Table 1	2	CC(C)(C)C(OC1=CC=CC=C1OC2=CC=CC=C2)=O	N/A	C12=CC=CC=C1OC3=C2C=CC=C3	Ni(COD)2	12.5	dcype	P(CCP(C1CCCCC1)C2CCCCC2)(C3CCCCC3)C4CCCCC4	25	Cs2CO3	xylene	160	24	74
CO136	Table 1	9	CC(C)(C)C(OC1=CC=CC=C1OC2=CC=CC=C2)=O	N/A	C12=CC=CC=C1OC3=C2C=CC=C3	Ni(COD)2	12.5	dcype	P(CCP(C1CCCCC1)C2CCCCC2)(C3CCCCC3)C4CCCCC4	25	Rb2CO3	xylene	160	24	58
CO136	Table 1	10	CC(C)(C)C(OC1=CC=CC=C1OC2=CC=CC=C2)=O	N/A	C12=CC=CC=C1OC3=C2C=CC=C3	Ni(COD)2	12.5	dcype	P(CCP(C1CCCCC1)C2CCCCC2)(C3CCCCC3)C4CCCCC4	25	K2CO3	xylene	160	24	54
CO136	Table 1	11	CC(C)(C)C(OC1=CC=CC=C1OC2=CC=CC=C2)=O	N/A	C12=CC=CC=C1OC3=C2C=CC=C3	Ni(COD)2	12.5	dcype	P(CCP(C1CCCCC1)C2CCCCC2)(C3CCCCC3)C4CCCCC4	25	K3PO4	xylene	160	24	41
CO137	Table 2	2	COC1=CC=C(OS(C)(=O)=O)C=C1	COC1=CC=C(B(O)O)C=C1	COC1=CC=C(C2=CC=C(OC)C=C2)C=C1	NiCl2(dppf)	3	dppf	C1=CC=C(C=C1)P([C-]2C=CC=C2)C3=CC=CC=C3.C1=CC=C(C=C1)P([C-]2C=CC=C2)C3=CC=CC=C3.[Fe+2]	6	K3PO4	dioxane	80	16	50
CO137	Table 2	5	COC1=CC=C(OS(C)(=O)=O)C=C1	COC1=CC=C(B(O)O)C=C1	COC1=CC=C(C2=CC=C(OC)C=C2)C=C1	NiCl2(PCy3)2	3	PCy3	P(C1CCCCC1)(C2CCCCC2)C3CCCCC3	6	K3PO4	toluene	80	16	44
CO137	Table 2	7	COC1=CC=C(OS(C)(=O)=O)C=C1	COC1=CC=C(B(O)O)C=C1	COC1=CC=C(C2=CC=C(OC)C=C2)C=C1	NiCl2(dppp)	3	dppp	P(CCCP(C1=CC=CC=C1)C2=CC=CC=C2)(C3=CC=CC=C3)C4=CC=CC=C4	6	K3PO4	toluene	80	16	43
CO137	Table 2	8	COC1=CC=C(OS(C)(=O)=O)C=C1	COC1=CC=C(B(O)O)C=C1	COC1=CC=C(C2=CC=C(OC)C=C2)C=C1	NiCl2(dppf)	3	dppf	C1=CC=C(C=C1)P([C-]2C=CC=C2)C3=CC=CC=C3.C1=CC=C(C=C1)P([C-]2C=CC=C2)C3=CC=CC=C3.[Fe+2]	3	K3PO4	toluene	80	16	50
CO137	Table 2	9	COC1=CC=C(OS(C)(=O)=O)C=C1	COC1=CC=C(B(O)O)C=C1	COC1=CC=C(C2=CC=C(OC)C=C2)C=C1	NiCl2(dppf)	3	dppf	C1=CC=C(C=C1)P([C-]2C=CC=C2)C3=CC=CC=C3.C1=CC=C(C=C1)P([C-]2C=CC=C2)C3=CC=CC=C3.[Fe+3]	6	K3PO4	toluene	80	16	57
CO137	Table 2	11	COC1=CC=C(OS(C)(=O)=O)C=C1	COC1=CC=C(B(O)O)C=C1	COC1=CC=C(C2=CC=C(OC)C=C2)C=C1	NiCl2(dppf)	3	dppf	C1=CC=C(C=C1)P([C-]2C=CC=C2)C3=CC=CC=C3.C1=CC=C(C=C1)P([C-]2C=CC=C2)C3=CC=CC=C3.[Fe+5]	6	K3PO4	toluene	100	16	85
CO138	Table 1	1	C=CC(C)OC(C)=O	O=C(CC(OC)=O)OC	C=CC(C)C(C(OC)=O)C(OC)=O	Ni(COD)2	1.33	dppb	P(CCCCP(C1=CC=CC=C1)C2=CC=CC=C2)(C3=CC=CC=C3)C4=CC=CC=C4	2.67	N/A	THF	20	0.13	65
CO138	Table 1	2	C=CC(C)OC(C)=O	O=C(CC(OC)=O)OC	C=CC(C)C(C(OC)=O)C(OC)=O	Ni(COD)2	1.33	dppmae	CN(CCN(P(C1=CC=CC=C1)C2=CC=CC=C2)C)P(C3=CC=CC=C3)C4=CC=CC=C4	2.67	N/A	THF	20	0.058	70
CO139	Table 1	1	O=C(C1=CC=C(OS(C)(=O)=O)C=C1)OC	C[B-]1(C2=CC=CO2)OC(C)C(C)O1	O=C(C1=CC=C(C2=CC=CO2)C=C1)OC	NiCl2(PPh3)2	10	PPh3	P(C1=CC=CC=C1)(C2=CC=CC=C2)C3=CC=CC=C3	20	MeLi	Unknown	20	11	82
CO139	Table 1	2	O=C(C1=CC=C(OS(C)(=O)=O)C=C1)OC	C[B-]1(C2=CC=CO2)OC(C)C(C)O1	O=C(C1=CC=C(C2=CC=CO2)C=C1)OC	NiCl2(dppf)	10	dppf	C1=CC=C(C=C1)P([C-]2C=CC=C2)C3=CC=CC=C3.C1=CC=C(C=C1)P([C-]2C=CC=C2)C3=CC=CC=C3.[Fe+5]	10	MeLi	Unknown	20	14	91
CO139	Table 1	18	O=C(C1=CC=C(OS(C2=CC=C(C)C=C2)(=O)=O)C=C1)OC	CC1O[B-](C2=CC=CC=C2)(CCCC)OC1C	O=C(C1=CC=C(C2=CC=CC=C2)C=C1)OC	NiCl2(PPh3)2	10	PPh3	P(C1=CC=CC=C1)(C2=CC=CC=C2)C3=CC=CC=C3	20	BuLi	Unknown	20	14	83
CO140	Table 1	5	CC1=CC=C(OS(C2=CC=C(C)C=C2)(=O)=O)C=C1	OB(O)C1=CC=CC=C1	CC1=CC=C(C2=CC=CC=C2)C=C1	Ni(COD)2	3	dppf	C1=CC=C(C=C1)P([C-]2C=CC=C2)C3=CC=CC=C3.C1=CC=C(C=C1)P([C-]2C=CC=C2)C3=CC=CC=C3.[Fe+3]	9	K3PO4	THF	25	24	72
CO140	Table 1	6	CC1=CC=C(OS(C2=CC=C(C)C=C2)(=O)=O)C=C1	OB(O)C1=CC=CC=C1	CC1=CC=C(C2=CC=CC=C2)C=C1	Ni(COD)2	3	dppf	C1=CC=C(C=C1)P([C-]2C=CC=C2)C3=CC=CC=C3.C1=CC=C(C=C1)P([C-]2C=CC=C2)C3=CC=CC=C3.[Fe+5]	12	K3PO4	THF	25	24	64
CO141	Table	2	C=CC(OP(OCC)(OCC)=O)=C	Br[Mg]C1=CC=CC=C1	C=CC(C1=CC=CC=C1)=C	NiCl2(dppe)	6.67	dppe	P(CCP(C1=CC=CC=C1)C2=CC=CC=C2)(C3=CC=CC=C3)C4=CC=CC=C4	6.67	N/A	THF	Unknown	Unknown	64
CO141	Table	3	C=CC(OP(OCC)(OCC)=O)=C	Br[Mg]C1=CC=CC=C1	C=CC(C1=CC=CC=C1)=C	NiCl2(dppp)	6.67	dppp	P(CCCP(C1=CC=CC=C1)C2=CC=CC=C2)(C3=CC=CC=C3)C4=CC=CC=C4	6.67	N/A	THF	Unknown	Unknown	67
CO142	Table 1	4	COC(/C=C/C1=CC=CC=C1)C2=CC=CC=C2	C[Mg]Br	CC(/C=C/C1=CC=CC=C1)C2=CC=CC=C2	Ni(COD)2	5	(S,S)-Chirophos	C[C@@H]([C@H](C)P(C1=CC=CC=C1)C2=CC=CC=C2)P(C3=CC=CC=C3)C4=CC=CC=C4	5	N/A	Et2O	25	20	91
CO142	Table 1	9	COC(/C=C/C1=CC=CC=C1)C2=CC=CC=C2	C[Mg]Br	CC(/C=C/C1=CC=CC=C1)C2=CC=CC=C2	Ni(COD)2	5	(R,R)-Me-Duphos	C[C@@H]1CC[C@@H](C)P1C2=CC=CC=C2P3[C@H](C)CC[C@H]3C	5	N/A	Et2O	25	20	88
CO143	Table 1	1	O=P(OC1=CCCCC1)(OC2=CC=CC=C2)OC3=CC=CC=C3	COC1=CC=C(B(O)O)C=C1	COC(C=C1)=CC=C1C2=CCCCC2	NiCl2(dppf)	3.33	dppf	C1=CC=C(C=C1)P([C-]2C=CC=C2)C3=CC=CC=C3.C1=CC=C(C=C1)P([C-]2C=CC=C2)C3=CC=CC=C3.[Fe+5]	6.67	K3PO4	toluene	90	24	82
CO144	Table 1	1	CC1=CC=C(S(OC2=CC=CC3=CC=CC=C32)(=O)=O)C=C1	CC1=CC=C([Mg]Br)C=C1	CC(C=C1)=CC=C1C2=CC=CC3=CC=CC=C32	NiF2	10	IPr*OMe	COC1=CC(C(C2=CC=CC=C2)C3=CC=CC=C3)=C(C(C(C4=CC=CC=C4)C5=CC=CC=C5)=C1)N6[C]N(C=C6)C7=C(C=C(OC)C=C7C(C8=CC=CC=C8)C9=CC=CC=C9)C(C%10=CC=CC=C%10)C%11=CC=CC=C%11	10	N/A	THF	66	20	98
CO144	Table 1	2	CC1=CC=C(S(OC2=CC=CC3=CC=CC=C32)(=O)=O)C=C1	CC1=CC=C([Mg]Br)C=C1	CC(C=C1)=CC=C1C2=CC=CC3=CC=CC=C32	NiF2	10	IPr*	CC1=CC(C(C2=CC=CC=C2)C3=CC=CC=C3)=C(C(C(C4=CC=CC=C4)C5=CC=CC=C5)=C1)N6[C]N(C=C6)C7=C(C=C(C)C=C7C(C8=CC=CC=C8)C9=CC=CC=C9)C(C%10=CC=CC=C%10)C%11=CC=CC=C%11	10	N/A	THF	66	20	98
CO144	Table 1	3	CC1=CC=C(S(OC2=CC=CC3=CC=CC=C32)(=O)=O)C=C1	CC1=CC=C([Mg]Br)C=C1	CC(C=C1)=CC=C1C2=CC=CC3=CC=CC=C32	NiF2	10	IPaul	CC(C=C(C)C=C1C(C2=CC=CC=C2)C3=CC=CC=C3)=C1N(C=C4)[C]N4C(C(C)=CC(C)=C5)=C5C(C6=CC=CC=C6)C7=CC=CC=C7	10	N/A	THF	66	20	93
CO144	Table 1	4	CC1=CC=C(S(OC2=CC=CC3=CC=CC=C32)(=O)=O)C=C1	CC1=CC=C([Mg]Br)C=C1	CC(C=C1)=CC=C1C2=CC=CC3=CC=CC=C32	NiF2	10	BIAN-IPr	CC(C)C1=C(C(C(C)C)=CC=C1)N2[C]N(C3=C2C4=C5C3=CC=CC5=CC=C4)C6=C(C=CC=C6C(C)C)C(C)C	10	N/A	THF	66	20	57
CO144	Table 1	5	CC1=CC=C(S(OC2=CC=CC3=CC=CC=C32)(=O)=O)C=C1	CC1=CC=C([Mg]Br)C=C1	CC(C=C1)=CC=C1C2=CC=CC3=CC=CC=C32	NiF2	10	BIAN-IPrCHPh2	CC(C)C1=C(C(C(C)C)=CC(C(C2=CC=CC=C2)C3=CC=CC=C3)=C1)N4[C]N(C5=C4C6=C7C5=CC=CC7=CC=C6)C8=C(C=C(C(C9=CC=CC=C9)C%10=CC=CC=C%10)C=C8C(C)C)C(C)C	10	N/A	THF	66	20	69
CO144	Table 1	6	CC1=CC=C(S(OC2=CC=CC3=CC=CC=C32)(=O)=O)C=C1	CC1=CC=C([Mg]Br)C=C1	CC(C=C1)=CC=C1C2=CC=CC3=CC=CC=C32	NiF2	10	IPr	CC(C1=C(N2[C]N(C3=C(C(C)C)C=CC=C3C(C)C)C=C2)C(C(C)C)=CC=C1)C	10	N/A	THF	66	20	92
CO144	Table 1	7	CC1=CC=C(S(OC2=CC=CC3=CC=CC=C32)(=O)=O)C=C1	CC1=CC=C([Mg]Br)C=C1	CC(C=C1)=CC=C1C2=CC=CC3=CC=CC=C32	NiF2	5	IPr*OMe	COC1=CC(C(C2=CC=CC=C2)C3=CC=CC=C3)=C(C(C(C4=CC=CC=C4)C5=CC=CC=C5)=C1)N6[C]N(C=C6)C7=C(C=C(OC)C=C7C(C8=CC=CC=C8)C9=CC=CC=C9)C(C%10=CC=CC=C%10)C%11=CC=CC=C%11	10	N/A	THF	66	20	98
CO144	Table 1	8	CC1=CC=C(S(OC2=CC=CC3=CC=CC=C32)(=O)=O)C=C1	CC1=CC=C([Mg]Br)C=C1	CC(C=C1)=CC=C1C2=CC=CC3=CC=CC=C32	NiF2	5	IPr	CC(C1=C(N2[C]N(C3=C(C(C)C)C=CC=C3C(C)C)C=C2)C(C(C)C)=CC=C1)C	10	N/A	THF	66	20	79
CO144	Table 1	9	CC1=CC=C(S(OC2=CC=CC3=CC=CC=C32)(=O)=O)C=C1	CC1=CC=C([Mg]Br)C=C1	CC(C=C1)=CC=C1C2=CC=CC3=CC=CC=C32	Ni(acac)2	10	IPr*OMe	COC1=CC(C(C2=CC=CC=C2)C3=CC=CC=C3)=C(C(C(C4=CC=CC=C4)C5=CC=CC=C5)=C1)N6[C]N(C=C6)C7=C(C=C(OC)C=C7C(C8=CC=CC=C8)C9=CC=CC=C9)C(C%10=CC=CC=C%10)C%11=CC=CC=C%11	10	N/A	THF	66	20	89
CO144	Table 1	10	CC1=CC=C(S(OC2=CC=CC3=CC=CC=C32)(=O)=O)C=C1	CC1=CC=C([Mg]Br)C=C1	CC(C=C1)=CC=C1C2=CC=CC3=CC=CC=C32	NiCl2•6H2O	10	IPr*OMe	COC1=CC(C(C2=CC=CC=C2)C3=CC=CC=C3)=C(C(C(C4=CC=CC=C4)C5=CC=CC=C5)=C1)N6[C]N(C=C6)C7=C(C=C(OC)C=C7C(C8=CC=CC=C8)C9=CC=CC=C9)C(C%10=CC=CC=C%10)C%11=CC=CC=C%11	10	N/A	THF	66	20	87
CO144	Table 1	12	CC1=CC=C(S(OC2=CC=CC3=CC=CC=C32)(=O)=O)C=C1	CC1=CC=C([Mg]Br)C=C1	CC(C=C1)=CC=C1C2=CC=CC3=CC=CC=C32	NiF2	10	IPr*OMe	COC1=CC(C(C2=CC=CC=C2)C3=CC=CC=C3)=C(C(C(C4=CC=CC=C4)C5=CC=CC=C5)=C1)N6[C]N(C=C6)C7=C(C=C(OC)C=C7C(C8=CC=CC=C8)C9=CC=CC=C9)C(C%10=CC=CC=C%10)C%11=CC=CC=C%11	10	N/A	THF	66	20	52
CO144	Table 1	13	CC1=CC=C(S(OC2=CC=CC3=CC=CC=C32)(=O)=O)C=C1	CC1=CC=C([Mg]Br)C=C1	CC(C=C1)=CC=C1C2=CC=CC3=CC=CC=C32	Ni(IPr*OMe)CpCl	10	IPr*OMe	COC1=CC(C(C2=CC=CC=C2)C3=CC=CC=C3)=C(C(C(C4=CC=CC=C4)C5=CC=CC=C5)=C1)N6[C]N(C=C6)C7=C(C=C(OC)C=C7C(C8=CC=CC=C8)C9=CC=CC=C9)C(C%10=CC=CC=C%10)C%11=CC=CC=C%11	10	N/A	THF	66	20	89
CO144	Table 1	14	CC1=CC=C(S(OC2=CC=CC3=CC=CC=C32)(=O)=O)C=C1	CC1=CC=C([Mg]Br)C=C1	CC(C=C1)=CC=C1C2=CC=CC3=CC=CC=C32	Ni(IPr*OMe)CpCl	10	IPr*OMe	COC1=CC(C(C2=CC=CC=C2)C3=CC=CC=C3)=C(C(C(C4=CC=CC=C4)C5=CC=CC=C5)=C1)N6[C]N(C=C6)C7=C(C=C(OC)C=C7C(C8=CC=CC=C8)C9=CC=CC=C9)C(C%10=CC=CC=C%10)C%11=CC=CC=C%11	20	N/A	THF	66	20	98
CO144	Table 1	15	CC1=CC=C(S(OC2=CC=CC3=CC=CC=C32)(=O)=O)C=C1	CC1=CC=C([Mg]Br)C=C1	CC(C=C1)=CC=C1C2=CC=CC3=CC=CC=C32	NiF2	10	IPr*OMe	COC1=CC(C(C2=CC=CC=C2)C3=CC=CC=C3)=C(C(C(C4=CC=CC=C4)C5=CC=CC=C5)=C1)N6[C]N(C=C6)C7=C(C=C(OC)C=C7C(C8=CC=CC=C8)C9=CC=CC=C9)C(C%10=CC=CC=C%10)C%11=CC=CC=C%11	10	N/A	THF	66	20	98
CO144	Table 1	16	CC1=CC=C(S(OC2=CC=CC3=CC=CC=C32)(=O)=O)C=C1	CC1=CC=C([Mg]Br)C=C1	CC(C=C1)=CC=C1C2=CC=CC3=CC=CC=C32	NiF2	10	IPr*OMe	COC1=CC(C(C2=CC=CC=C2)C3=CC=CC=C3)=C(C(C(C4=CC=CC=C4)C5=CC=CC=C5)=C1)N6[C]N(C=C6)C7=C(C=C(OC)C=C7C(C8=CC=CC=C8)C9=CC=CC=C9)C(C%10=CC=CC=C%10)C%11=CC=CC=C%11	10	N/A	THF	66	20	99
CO145	Table 1	10	CCCCCCCCC/C=C/OC	CC1=CC=C(B2OCC(C)(C)CO2)C=C1	CCCCCCCCC/C=C/C1=CC=C(C)C=C1	Ni(acac)2	10	PCy3	P(C1CCCCC1)(C2CCCCC2)C3CCCCC3	20	N/A	toluene	105	12	62
CO145	Table 1	13	CCCCCCCCC/C=C/OC	CC1=CC=C(B2OCC(C)(C)CO2)C=C1	CCCCCCCCC/C=C/C1=CC=C(C)C=C1	Ni(acac)2	5	PCy3	P(C1CCCCC1)(C2CCCCC2)C3CCCCC3	30	N/A	toluene	85	12	92
CO146	Scheme 2	N/A	CN(C(C(C)=C)=O)C1=CC=CC=C1OS(=O)(C(F)(F)F)=O	OB(O)C1=CC=CC=C1	CN1C2=CC=CC=C2C(C)(CC3=CC=CC=C3)C1=O	Ni(COD)2	10	L1	C1(P(C2CCCCC2)C3CCCCC3)=CC=CC=C1OC4=CC=CC=C4P(C5CCCCC5)C6CCCCC6	20	K2CO3	toluene	100	16	84
CO146	Scheme 2	N/A	CN(C(C(C)=C)=O)C1=CC=CC=C1OS(=O)(C(F)(F)F)=O	OB(O)C1=CC=CC=C1	CN1C2=CC=CC=C2C(C)(CC3=CC=CC=C3)C1=O	NiCl2(dppp)	10	PPh3	P(C1=CC=CC=C1)(C2=CC=CC=C2)C3=CC=CC=C3	20	K2CO3	toluene	100	16	74
CO146	Table 1	17	CN(C(C(C)=C)=O)C1=CC=CC=C1OC(C(C)(C)C)=O	OB(O)C1=CC=CC=C1	CN1C2=CC=CC=C2C(C)(CC3=CC=CC=C3)C1=O	Ni(PPh3)4	15	PPh3	P(C1=CC=CC=C1)(C2=CC=CC=C2)C3=CC=CC=C3	30	NaOtBu	toluene	100	16	56
CO146	Table 1	18	CN(C(C(C)=C)=O)C1=CC=CC=C1OC(C(C)(C)C)=O	OB(O)C1=CC=CC=C1	CN1C2=CC=CC=C2C(C)(CC3=CC=CC=C3)C1=O	Ni(PPh3)4	20	PPh3	P(C1=CC=CC=C1)(C2=CC=CC=C2)C3=CC=CC=C3	40	NaOtBu	toluene	100	16	70
CO147	Table 1	8	C1(OC2=C3C=CC=C2)=C3C=CC=C1	CC1=CC=C([Mg]Br)C=C1	OC1=C(C2=C(C3=CC=C(C)C=C3)C=CC=C2)C=CC=C1	Ni(COD)2	5	ICy	C1(N2[C]N(C=C2)C3CCCCC3)CCCCC1	10	N/A	THF	80	1	80
CO147	Table 1	9	C1(OC2=C3C=CC=C2)=C3C=CC=C1	CC1=CC=C([Mg]Br)C=C1	OC1=C(C2=C(C3=CC=C(C)C=C3)C=CC=C2)C=CC=C1	Ni(COD)2	5	IAd	N1([C]N(C=C1)C23C[C@H]4C[C@H](C[C@H](C4)C3)C2)C56C[C@H]7C[C@H](C[C@H](C7)C6)C5	10	N/A	THF	80	1	91
CO148	Table 5	1	CCC1=CC=C(OS(C2=CC=C(C)C=C2)(=O)=O)C=C1	Br[Mg]C1=CC=CC=C1	CCC1=CC=C(C2=CC=CC=C2)C=C1	NiCl2(dppf)	5	dppf	C1=CC=C(C=C1)P([C-]2C=CC=C2)C3=CC=CC=C3.C1=CC=C(C=C1)P([C-]2C=CC=C2)C3=CC=CC=C3.[Fe+5]	5	N/A	THF	reflux	28	73

## Sheet: Failed Reactions (Yield < 40%)
Article ID	Table/Scheme	Entry	Electrophile SMILES	Nucleophile SMILES	Product SMILES	Ni Precatalyst	Precatalyst Loading (mol%)	Effective Ligand	Ligand SMILES	Effective Ligand Loading (mol%)	Additional Base	Solvent	Temperature (°C)	Time (h)	Yield
CO003	Table 1	1	CC(C)(C)C(OC1=CC2=CC=CC=C2C=C1)=O	COC(C=C1)=CC=C1CCCB2[C@@H]3CCC[C@@H]2CCC3	COC1=CC=C(CCCC2=CC(C=CC=C3)=C3C=C2)C=C1	NiBr2	8	IPr	CC(C)C(C=CC=C1C(C)C)=C1N2[C]N(C3=C(C(C)C)C=CC=C3C(C)C)C=C2	16	Cs2CO3	iPr2O	100	12	0
CO003	Table 1	2	CC(C)(C)C(OC1=CC2=CC=CC=C2C=C1)=O	COC(C=C1)=CC=C1CCCB2[C@@H]3CCC[C@@H]2CCC3	COC1=CC=C(CCCC2=CC(C=CC=C3)=C3C=C2)C=C1	NiCl2	8	IPr	CC(C)C(C=CC=C1C(C)C)=C1N2[C]N(C3=C(C(C)C)C=CC=C3C(C)C)C=C2	16	Cs2CO3	iPr2O	100	12	0
CO003	Table 1	3	CC(C)(C)C(OC1=CC2=CC=CC=C2C=C1)=O	COC(C=C1)=CC=C1CCCB2[C@@H]3CCC[C@@H]2CCC3	COC1=CC=C(CCCC2=CC(C=CC=C3)=C3C=C2)C=C1	Ni(acac)2	8	IPr	CC(C)C(C=CC=C1C(C)C)=C1N2[C]N(C3=C(C(C)C)C=CC=C3C(C)C)C=C2	16	Cs2CO3	iPr2O	100	12	11
CO003	Table 1	4	CC(C)(C)C(OC1=CC2=CC=CC=C2C=C1)=O	COC(C=C1)=CC=C1CCCB2[C@@H]3CCC[C@@H]2CCC3	COC1=CC=C(CCCC2=CC(C=CC=C3)=C3C=C2)C=C1	Ni(IMes)2	8	IMes	CC1=C(N2C=CN(C3=C(C)C=C(C)C=C3C)[C]2)C(C)=CC(C)=C1	16	Cs2CO3	iPr2O	100	12	21
CO003	Table 1	6	CC(C)(C)C(OC1=CC2=CC=CC=C2C=C1)=O	COC(C=C1)=CC=C1CCCB2[C@@H]3CCC[C@@H]2CCC3	COC1=CC=C(CCCC2=CC(C=CC=C3)=C3C=C2)C=C1	Ni(COD)2	8	SIPr	CC(C1=C(N2CCN(C3=C(C(C)C)C=CC=C3C(C)C)[C]2)C(C(C)C)=CC=C1)C	16	Cs2CO3	iPr2O	100	12	10
CO003	Table 1	7	CC(C)(C)C(OC1=CC2=CC=CC=C2C=C1)=O	COC(C=C1)=CC=C1CCCB2[C@@H]3CCC[C@@H]2CCC3	COC1=CC=C(CCCC2=CC(C=CC=C3)=C3C=C2)C=C1	Ni(COD)2	8	IMes	CC1=C(N2C=CN(C3=C(C)C=C(C)C=C3C)[C]2)C(C)=CC(C)=C1	16	Cs2CO3	iPr2O	100	12	26
CO003	Table 1	8	CC(C)(C)C(OC1=CC2=CC=CC=C2C=C1)=O	COC(C=C1)=CC=C1CCCB2[C@@H]3CCC[C@@H]2CCC3	COC1=CC=C(CCCC2=CC(C=CC=C3)=C3C=C2)C=C1	Ni(COD)2	8	PCy3	P(C1CCCCC1)(C2CCCCC2)C3CCCCC3	16	Cs2CO3	iPr2O	100	12	0
CO003	Table 1	9	CC(C)(C)C(OC1=CC2=CC=CC=C2C=C1)=O	COC(C=C1)=CC=C1CCCB2[C@@H]3CCC[C@@H]2CCC3	COC1=CC=C(CCCC2=CC(C=CC=C3)=C3C=C2)C=C1	Ni(COD)2	8	dppf	C1=CC=C(C=C1)P([C-]2C=CC=C2)C3=CC=CC=C3.C1=CC=C(C=C1)P([C-]2C=CC=C2)C3=CC=CC=C3.[Fe+2]	16	Cs2CO3	iPr2O	100	12	11
CO003	Table 1	10	CC(C)(C)C(OC1=CC2=CC=CC=C2C=C1)=O	COC(C=C1)=CC=C1CCCB2[C@@H]3CCC[C@@H]2CCC3	COC1=CC=C(CCCC2=CC(C=CC=C3)=C3C=C2)C=C1	Ni(COD)2	8	dcype	P(CCP(C1CCCCC1)C2CCCCC2)(C3CCCCC3)C4CCCCC4	16	Cs2CO3	iPr2O	100	12	19
CO003	Table 1	11	CC(C)(C)C(OC1=CC2=CC=CC=C2C=C1)=O	COC(C=C1)=CC=C1CCCB2[C@@H]3CCC[C@@H]2CCC3	COC1=CC=C(CCCC2=CC(C=CC=C3)=C3C=C2)C=C1	Ni(COD)2	8	IPr	CC(C)C(C=CC=C1C(C)C)=C1N2[C]N(C3=C(C(C)C)C=CC=C3C(C)C)C=C2	16	tBuOK	iPr2O	100	12	27
CO003	Table 1	12	CC(C)(C)C(OC1=CC2=CC=CC=C2C=C1)=O	COC(C=C1)=CC=C1CCCB2[C@@H]3CCC[C@@H]2CCC3	COC1=CC=C(CCCC2=CC(C=CC=C3)=C3C=C2)C=C1	Ni(COD)2	8	IPr	CC(C)C(C=CC=C1C(C)C)=C1N2[C]N(C3=C(C(C)C)C=CC=C3C(C)C)C=C2	16	CsF	iPr2O	100	12	38
CO003	Table 1	14	CC(C)(C)C(OC1=CC2=CC=CC=C2C=C1)=O	COC(C=C1)=CC=C1CCCB2[C@@H]3CCC[C@@H]2CCC3	COC1=CC=C(CCCC2=CC(C=CC=C3)=C3C=C2)C=C1	Ni(COD)2	8	IPr	CC(C)C(C=CC=C1C(C)C)=C1N2[C]N(C3=C(C(C)C)C=CC=C3C(C)C)C=C2	16	N/A	iPr2O	100	12	0
CO007	Scheme 2	N/A	COC1=CC2=CC=CC=C2C=C1	CN1C2=CC=CC=C2N=C1	CN1C2=CC=CC=C2N=C1C3=CC=C(C=CC=C4)C4=C3	Ni(COD)2	10	Phen	C12=CC=C3C=CC=NC3=C1N=CC=C2	10	o-tolylMgBr	m-xylene	90	16	18
CO007	Scheme 2	N/A	COC1=CC2=CC=CC=C2C=C1	CN1C2=CC=CC=C2N=C1	CN1C2=CC=CC=C2N=C1C3=CC=C(C=CC=C4)C4=C3	Ni(COD)2	10	PCy3	P(C1CCCCC1)(C2CCCCC2)C3CCCCC3	10	o-tolylMgBr	m-xylene	90	16	9
CO007	Scheme 2	N/A	COC1=CC2=CC=CC=C2C=C1	CN1C2=CC=CC=C2N=C1	CN1C2=CC=CC=C2N=C1C3=CC=C(C=CC=C4)C4=C3	Ni(COD)2	10	dppp	P(CCCP(C1=CC=CC=C1)C2=CC=CC=C2)(C3=CC=CC=C3)C4=CC=CC=C4	10	o-tolylMgBr	m-xylene	90	16	6
CO008	Table 1	1	COC1=CC2=C(C=C1)CCCC2	CC1=CC=C([Mg]Br)C=C1	CC(C=C1)=CC=C1C(C=C2)=CC3=C2CCCC3	NiCl2(PMe3)2	5	PMe3	CP(C)C	10	N/A	THF	60	15	2
CO008	Table 1	2	COC1=CC2=C(C=C1)CCCC2	CC1=CC=C([Mg]Br)C=C1	CC(C=C1)=CC=C1C(C=C2)=CC3=C2CCCC3	NiCl2(PEt3)2	5	PEt3	CCP(CC)CC	10	N/A	THF	60	15	15
CO008	Table 1	5	COC1=CC2=C(C=C1)CCCC2	CC1=CC=C([Mg]Br)C=C1	CC(C=C1)=CC=C1C(C=C2)=CC3=C2CCCC3	Ni(acac)2	5	P(iBu)3	CC(CP(CC(C)C)CC(C)C)C	10	N/A	THF	60	15	26
CO008	Table 1	6	COC1=CC2=C(C=C1)CCCC2	CC1=CC=C([Mg]Br)C=C1	CC(C=C1)=CC=C1C(C=C2)=CC3=C2CCCC3	Ni(acac)2	5	P(tBu)2Me	CP(C(C)(C)C)C(C)(C)C	10	N/A	THF	60	15	37
CO008	Table 1	8	COC1=CC2=C(C=C1)CCCC2	CC1=CC=C([Mg]Br)C=C1	CC(C=C1)=CC=C1C(C=C2)=CC3=C2CCCC3	Ni(acac)2	5	P(tBu)3	CC(P(C(C)(C)C)C(C)(C)C)(C)C	10	N/A	THF	60	15	4
CO008	Table 3	8	COC1=CC2=C(C=C1)CCCC2	CC1=CC=C([Mg]Br)C=C1	CC(C=C1)=CC=C1C(C=C2)=CC3=C2CCCC3	NiCl2(PPh3)2	5	PPh3	P(C1=CC=CC=C1)(C2=CC=CC=C2)C3=CC=CC=C3	10	N/A	THF	60	15	15
CO010	Table 1	1	O=C(C)OC1=CC2=CC=CC=C2C=C1	Cl[Zn]C1=CC=CC=C1	C12=CC=CC=C1C=C(C3=CC=CC=C3)C=C2	NiCl2(PCy3)2	5	PCy3	P(C1CCCCC1)(C2CCCCC2)C3CCCCC3	10	N/A	THF/DMA	70	2	21
CO010	Table 1	5	O=C(OC1=CC(C=CC=C2)=C2C=C1)C(C)(C)C	Cl[Zn]C1=CC=CC=C1	C12=CC=CC=C1C=C(C3=CC=CC=C3)C=C2	NiCl2	5	PPh3	P(C1=CC=CC=C1)(C2=CC=CC=C2)C3=CC=CC=C3	10	N/A	THF/DMA	70	2	19
CO010	Table 1	6	O=C(OC1=CC(C=CC=C2)=C2C=C1)C(C)(C)C	Cl[Zn]C1=CC=CC=C1	C12=CC=CC=C1C=C(C3=CC=CC=C3)C=C2	NiCl2	5	PBu3	CCCCP(CCCC)CCCC	10	N/A	THF/DMA	70	2	38
CO010	Table 1	8	O=C(OC1=CC(C=CC=C2)=C2C=C1)C(C)(C)C	Cl[Zn]C1=CC=CC=C1	C12=CC=CC=C1C=C(C3=CC=CC=C3)C=C2	NiCl2(PCy3)2	5	PCy3	P(C1CCCCC1)(C2CCCCC2)C3CCCCC3	10	N/A	THF	70	2	6
CO010	Table 1	9	O=C(OC1=CC(C=CC=C2)=C2C=C1)C(C)(C)C	Cl[Zn]C1=CC=CC=C1	C12=CC=CC=C1C=C(C3=CC=CC=C3)C=C2	NiCl2(PCy3)2	5	PCy3	P(C1CCCCC1)(C2CCCCC2)C3CCCCC3	10	N/A	THF/DCE	70	2	5
CO010	Table 1	10	O=C(OC1=CC(C=CC=C2)=C2C=C1)C(C)(C)C	Cl[Zn]C1=CC=CC=C1	C12=CC=CC=C1C=C(C3=CC=CC=C3)C=C2	NiCl2(PCy3)2	5	PCy3	P(C1CCCCC1)(C2CCCCC2)C3CCCCC3	10	N/A	THF/toluene	70	2	5
CO014	Table 1	2	COC(C1=CC=CC=C1)C2=CC3=CC=CC=C3C=C2	COC1=CC=C([Mg]Br)C=C1	O(C1=CC=C(C=C1)C(C=2C=CC=CC2)C=3C=CC=4C=CC=CC4C3)C	Ni(COD)2	5	BINAP	C1(C2=C3C=CC=CC3=CC=C2P(C4=CC=CC=C4)C5=CC=CC=C5)=C6C=CC=CC6=CC=C1P(C7=CC=CC=C7)C8=CC=CC=C8	20	N/A	toluene	25	48	2
CO014	Table 1	3	COC(C1=CC=CC=C1)C2=CC3=CC=CC=C3C=C2	COC1=CC=C([Mg]Br)C=C1	O(C1=CC=C(C=C1)C(C=2C=CC=CC2)C=3C=CC=4C=CC=CC4C3)C	Ni(COD)2	5	dppf	C1=CC=C(C=C1)P([C-]2C=CC=C2)C3=CC=CC=C3.C1=CC=C(C=C1)P([C-]2C=CC=C2)C3=CC=CC=C3.[Fe+2]	20	N/A	toluene	25	48	3
CO014	Table 1	4	COC(C1=CC=CC=C1)C2=CC3=CC=CC=C3C=C2	COC1=CC=C([Mg]Br)C=C1	O(C1=CC=C(C=C1)C(C=2C=CC=CC2)C=3C=CC=4C=CC=CC4C3)C	Ni(COD)2	5	dppb	P(CCCCP(C1=CC=CC=C1)C2=CC=CC=C2)(C3=CC=CC=C3)C4=CC=CC=C4	20	N/A	toluene	25	48	14
CO014	Table 1	5	C(C1=CC=CC=C1)(C2=CC3=CC=CC=C3C=C2)OCC4=CC=CC=N4	COC1=CC=C([Mg]Br)C=C1	O(C1=CC=C(C=C1)C(C=2C=CC=CC2)C=3C=CC=4C=CC=CC4C3)C	Ni(COD)2	5	DPEPhos	C1(P(C2=CC=CC=C2)C3=CC=CC=C3)=CC=CC=C1OC4=CC=CC=C4P(C5=CC=CC=C5)C6=CC=CC=C6	20	N/A	toluene	25	48	2
CO014	Table 1	12	COCCOC(C1=CC2=CC=CC=C2C=C1)C3=CC=CC=C3	COC1=CC=C([Mg]Br)C=C1	O(C1=CC=C(C=C1)C(C=2C=CC=CC2)C=3C=CC=4C=CC=CC4C3)C	Ni(acac)2	10	PPh2Me	CP(C1=CC=CC=C1)C2=CC=CC=C2	40	N/A	toluene	25	48	12
CO016	Table 1	2	CCC(OC)C1=CC2=CC=CC=C2C=C1	CCCCC[Mg]I	CC[C@H](CCCCC)C1=CC2=CC=CC=C2C=C1	Ni(acac)2	10	N/A	N/A	0	N/A	toluene	25	24	5
CO016	Table 1	3	CCC(OC)C1=CC2=CC=CC=C2C=C1	CCCCC[Mg]I	CC[C@H](CCCCC)C1=CC2=CC=CC=C2C=C1	Ni(acac)2	10	BINAP	C1(C2=C3C=CC=CC3=CC=C2P(C4=CC=CC=C4)C5=CC=CC=C5)=C6C=CC=CC6=CC=C1P(C7=CC=CC=C7)C8=CC=CC=C8	10	N/A	toluene	25	24	5
CO016	Table 1	4	CCC(OC)C1=CC2=CC=CC=C2C=C1	CCCCC[Mg]I	CC[C@H](CCCCC)C1=CC2=CC=CC=C2C=C1	Ni(acac)2	10	DPEPhos	C1(P(C2=CC=CC=C2)C3=CC=CC=C3)=CC=CC=C1OC4=CC=CC=C4P(C5=CC=CC=C5)C6=CC=CC=C6	10	N/A	toluene	25	24	28
CO016	Table 1	5	CCC(OC)C1=CC2=CC=CC=C2C=C1	CCCCC[Mg]I	CC[C@H](CCCCC)C1=CC2=CC=CC=C2C=C1	Ni(acac)2	10	PPh3	P(C1=CC=CC=C1)(C2=CC=CC=C2)C3=CC=CC=C3	10	N/A	toluene	25	24	8
CO016	Table 1	6	CCC(OC)C1=CC2=CC=CC=C2C=C1	CCCCC[Mg]I	CC[C@H](CCCCC)C1=CC2=CC=CC=C2C=C1	Ni(acac)2	10	dppp	P(CCCP(C1=CC=CC=C1)C2=CC=CC=C2)(C3=CC=CC=C3)C4=CC=CC=C4	10	N/A	toluene	25	24	31
CO016	Table 1	10	CCC(OC)C1=CC2=CC=CC=C2C=C1	CCCCC[Mg]I	CC[C@H](CCCCC)C1=CC2=CC=CC=C2C=C1	Ni(acac)2	10	dppe	P(CCP(C1=CC=CC=C1)C2=CC=CC=C2)(C3=CC=CC=C3)C4=CC=CC=C4	22	N/A	toluene	25	24	5
CO016	Table 1	11	CCC(OC)C1=CC2=CC=CC=C2C=C1	CCCCC[Mg]I	CC[C@H](CCCCC)C1=CC2=CC=CC=C2C=C1	Ni(COD)2	10	dppe	P(CCP(C1=CC=CC=C1)C2=CC=CC=C2)(C3=CC=CC=C3)C4=CC=CC=C4	10	N/A	toluene	25	24	5
CO017	Table 1	1	O=C(OC1=CC(C=CC=C2)=C2C=C1)C(C)(C)C	O=C(CC1=CC=CC=C1)C2=CC=CC=C2	O=C(C(C1=CC(C=CC=C2)=C2C=C1)C3=CC=CC=C3)C4=CC=CC=C4	Ni(dcype)(CO)2	10	dcype	P(CCP(C1CCCCC1)C2CCCCC2)(C3CCCCC3)C4CCCCC4	10	K3PO4	toluene	150	24	25
CO017	Table 1	3	O=C(OC1=CC(C=CC=C2)=C2C=C1)C(C)(C)C	O=C(CC1=CC=CC=C1)C2=CC=CC=C2	O=C(C(C1=CC(C=CC=C2)=C2C=C1)C3=CC=CC=C3)C4=CC=CC=C4	Ni(L2)(CO)2	10	L2	P(C1CCCC1)(C2CCCC2)CCP(C3CCCC3)C4CCCC4	10	K3PO4	toluene	150	24	30
CO017	Table 1	4	O=C(OC1=CC(C=CC=C2)=C2C=C1)C(C)(C)C	O=C(CC1=CC=CC=C1)C2=CC=CC=C2	O=C(C(C1=CC(C=CC=C2)=C2C=C1)C3=CC=CC=C3)C4=CC=CC=C4	Ni(L3)(CO)2	10	L3	P(C1CCCCCC1)(C2CCCCCC2)CCP(C3CCCCCC3)C4CCCCCC4	10	K3PO4	toluene	150	24	18
CO019	Table 1	2	C=CCOC(OC(C)(C)C)=O	C1(CC2=CC=CC=C2)=CC=CC=C1	C=CCC(C1=CC=CC=C1)C2=CC=CC=C2	Ni(COD)2	5	dppf	C1=CC=C(C=C1)P([C-]2C=CC=C2)C3=CC=CC=C3.C1=CC=C(C=C1)P([C-]2C=CC=C2)C3=CC=CC=C3.[Fe+2]	5	KHMDS	DME	25	12	39
CO019	Table 1	5	C=CCOC(OC(C)(C)C)=O	C1(CC2=CC=CC=C2)=CC=CC=C1	C=CCC(C1=CC=CC=C1)C2=CC=CC=C2	Ni(COD)2	5	dppf	C1=CC=C(C=C1)P([C-]2C=CC=C2)C3=CC=CC=C3.C1=CC=C(C=C1)P([C-]2C=CC=C2)C3=CC=CC=C3.[Fe+2]	10	KHMDS	CPME	25	12	5
CO019	Table 1	6	C=CCOC(OC(C)(C)C)=O	C1(CC2=CC=CC=C2)=CC=CC=C1	C=CCC(C1=CC=CC=C1)C2=CC=CC=C2	Ni(COD)2	5	dppf	C1=CC=C(C=C1)P([C-]2C=CC=C2)C3=CC=CC=C3.C1=CC=C(C=C1)P([C-]2C=CC=C2)C3=CC=CC=C3.[Fe+2]	10	KHMDS	dioxane	25	12	5
CO019	Table 1	8	C=CCOC(OC(C)(C)C)=O	C1(CC2=CC=CC=C2)=CC=CC=C1	C=CCC(C1=CC=CC=C1)C2=CC=CC=C2	NiCl2	5	dppf	C1=CC=C(C=C1)P([C-]2C=CC=C2)C3=CC=CC=C3.C1=CC=C(C=C1)P([C-]2C=CC=C2)C3=CC=CC=C3.[Fe+2]	10	KHMDS	DME	25	12	35
CO021	Table 1	1	COC1=CC2=CC=CC=C2C=C1	COC(C=C1)=CC=C1CCCB2[C@@H]3CCC[C@@H]2CCC3	COC(C=C1)=CC=C1CCCC2=CC3=CC=CC=C3C=C2	Ni(COD)2	10	IPr	CC(C)C(C=CC=C1C(C)C)=C1N2[C]N(C3=C(C(C)C)C=CC=C3C(C)C)C=C2	20	Cs2CO3	iPr2O	130	12	2
CO021	Table 1	2	COC1=CC2=CC=CC=C2C=C1	COC(C=C1)=CC=C1CCCB2[C@@H]3CCC[C@@H]2CCC3	COC(C=C1)=CC=C1CCCC2=CC3=CC=CC=C3C=C2	Ni(COD)2	10	IPr	CC(C)C(C=CC=C1C(C)C)=C1N2[C]N(C3=C(C(C)C)C=CC=C3C(C)C)C=C2	20	K3PO4	iPr2O	130	12	0
CO021	Table 1	3	COC1=CC2=CC=CC=C2C=C1	COC(C=C1)=CC=C1CCCB2[C@@H]3CCC[C@@H]2CCC3	COC(C=C1)=CC=C1CCCC2=CC3=CC=CC=C3C=C2	Ni(COD)2	10	IPr	CC(C)C(C=CC=C1C(C)C)=C1N2[C]N(C3=C(C(C)C)C=CC=C3C(C)C)C=C2	20	Na2CO3	iPr2O	130	12	trace
CO021	Table 1	4	COC1=CC2=CC=CC=C2C=C1	COC(C=C1)=CC=C1CCCB2[C@@H]3CCC[C@@H]2CCC3	COC(C=C1)=CC=C1CCCC2=CC3=CC=CC=C3C=C2	Ni(COD)2	10	IPr	CC(C)C(C=CC=C1C(C)C)=C1N2[C]N(C3=C(C(C)C)C=CC=C3C(C)C)C=C2	20	CsCl	iPr2O	130	12	5
CO021	Table 1	5	COC1=CC2=CC=CC=C2C=C1	COC(C=C1)=CC=C1CCCB2[C@@H]3CCC[C@@H]2CCC3	COC(C=C1)=CC=C1CCCC2=CC3=CC=CC=C3C=C2	Ni(COD)2	10	IPr	CC(C)C(C=CC=C1C(C)C)=C1N2[C]N(C3=C(C(C)C)C=CC=C3C(C)C)C=C2	20	CsF	iPr2O	130	12	18
CO021	Table 1	6	COC1=CC2=CC=CC=C2C=C1	COC(C=C1)=CC=C1CCCB2[C@@H]3CCC[C@@H]2CCC3	COC(C=C1)=CC=C1CCCC2=CC3=CC=CC=C3C=C2	Ni(COD)2	10	N/A	N/A	20	CsF	iPr2O	130	12	0
CO021	Table 1	7	COC1=CC2=CC=CC=C2C=C1	COC(C=C1)=CC=C1CCCB2[C@@H]3CCC[C@@H]2CCC3	COC(C=C1)=CC=C1CCCC2=CC3=CC=CC=C3C=C2	Ni(COD)2	10	dcype	P(CCP(C1CCCCC1)C2CCCCC2)(C3CCCCC3)C4CCCCC4	10	CsF	iPr2O	130	12	0
CO021	Table 1	8	COC1=CC2=CC=CC=C2C=C1	COC(C=C1)=CC=C1CCCB2[C@@H]3CCC[C@@H]2CCC3	COC(C=C1)=CC=C1CCCC2=CC3=CC=CC=C3C=C2	Ni(COD)2	10	PCy3	P(C1CCCCC1)(C2CCCCC2)C3CCCCC3	20	CsF	iPr2O	130	12	28
CO021	Table 1	14	COC1=CC2=CC=CC=C2C=C1	COC(C=C1)=CC=C1CCCB2[C@@H]3CCC[C@@H]2CCC3	COC(C=C1)=CC=C1CCCC2=CC3=CC=CC=C3C=C2	Ni(COD)2	10	PCy3	P(C1CCCCC1)(C2CCCCC2)C3CCCCC3	40	CsF	iPr2O	100	60	31
CO024	Table 1	2	CN1C(C(OC)=O)=CC2=C1C=CC=C2	C1(CCCB2C3CCCC2CCC3)=CC=CC=C1	CN1C(C(CCC2=CC=CC=C2)=O)=CC3=C1C=CC=C9	Ni(COD)2	10	PCy3	P(C1CCCCC1)(C2CCCCC2)C3CCCCC3	20	K3PO4	toluene	130	16	0
CO024	Table 1	3	CN1C(C(OC)=O)=CC2=C1C=CC=C2	C1(CCCB2C3CCCC2CCC3)=CC=CC=C1	CN1C(C(CCC2=CC=CC=C2)=O)=CC3=C1C=CC=C10	Ni(COD)2	10	dcype	P(CCP(C1CCCCC1)C2CCCCC2)(C3CCCCC3)C4CCCCC4	20	K3PO4	toluene	130	16	0
CO024	Table 1	4	CN1C(C(OC)=O)=CC2=C1C=CC=C2	C1(CCCB2C3CCCC2CCC3)=CC=CC=C1	CN1C(C(CCC2=CC=CC=C2)=O)=CC3=C1C=CC=C11	Ni(COD)2	10	ICy	C1(N2[C]N(C=C2)C3CCCCC3)CCCCC1	20	K3PO4	toluene	130	16	0
CO026	Table 1	1	COC1=CC2=CC=CC=C2C=C1	C[Mg]Br	CC1=CC2=CC=CC=C2C=C1	NiCl2	5	N/A	N/A	0	N/A	toluene	80	0.33	trace
CO026	Table 1	2	COC1=CC2=CC=CC=C2C=C1	C[Mg]Br	CC1=CC2=CC=CC=C2C=C1	NiCl2	5	PCy3	P(C1CCCCC1)(C2CCCCC2)C3CCCCC3	10	N/A	toluene	80	0.33	22
CO026	Table 1	5	COC1=CC2=CC=CC=C2C=C1	C[Mg]Br	CC1=CC2=CC=CC=C2C=C1	NiCl2(PPh3)2	5	PPh3	P(C1=CC=CC=C1)(C2=CC=CC=C2)C3=CC=CC=C3	10	N/A	toluene	80	0.33	4
CO026	Table 1	6	COC1=CC2=CC=CC=C2C=C1	C[Mg]Br	CC1=CC2=CC=CC=C2C=C1	NiCl2	5	PPh3	P(C1=CC=CC=C1)(C2=CC=CC=C2)C3=CC=CC=C3	10	N/A	toluene	80	0.33	0
CO026	Table 1	7	COC1=CC2=CC=CC=C2C=C1	C[Mg]Br	CC1=CC2=CC=CC=C2C=C1	NiBr2	5	N/A	N/A	0	N/A	toluene	80	0.33	trace
CO026	Table 1	9	COC1=CC2=CC=CC=C2C=C1	C[Mg]Br	CC1=CC2=CC=CC=C2C=C1	Ni(acac)2	5	N/A	N/A	0	N/A	toluene	80	0.33	10
CO026	Table 1	11	COC1=CC2=CC=CC=C2C=C1	C[Mg]Br	CC1=CC2=CC=CC=C2C=C1	NiCl2(dppe)	5	dppe	P(CCP(C1=CC=CC=C1)C2=CC=CC=C2)(C3=CC=CC=C3)C4=CC=CC=C4	5	N/A	toluene	80	0.33	4
CO026	Table 1	12	COC1=CC2=CC=CC=C2C=C1	C[Mg]Br	CC1=CC2=CC=CC=C2C=C1	NiCl2(dppf)	5	dppf	C1=CC=C(C=C1)P([C-]2C=CC=C2)C3=CC=CC=C3.C1=CC=C(C=C1)P([C-]2C=CC=C2)C3=CC=CC=C3.[Fe+2]	5	N/A	toluene	80	0.33	7
CO030	Table 1	4	CC(C)(C(OC1=C2C(C=CC=C2)=CC3=CC=CC=C31)=O)C	OB(O)C1=CC=CC=C1	C1(C2=CC=CC=C2)=C3C(C=CC=C3)=CC4=CC=CC=C41	1	2	PPh3	P(C1=CC=CC=C1)(C2=CC=CC=C2)C3=CC=CC=C3	8	K3PO4	toluene	100	6	4
CO030	Table 1	11	CC(C)(C(OC1=C2C(C=CC=C2)=CC3=CC=CC=C31)=O)C	OB(O)C1=CC=CC=C1	C1(C2=CC=CC=C2)=C3C(C=CC=C3)=CC4=CC=CC=C41	1	0.5	PPh3	P(C1=CC=CC=C1)(C2=CC=CC=C2)C3=CC=CC=C3	2	K3PO4	toluene	100	6	18
CO030	Table 1	13	CC(C)(C(OC1=C2C(C=CC=C2)=CC3=CC=CC=C31)=O)C	OB(O)C1=CC=CC=C1	C1(C2=CC=CC=C2)=C3C(C=CC=C3)=CC4=CC=CC=C41	NiBr2	0.5	PPh3	P(C1=CC=CC=C1)(C2=CC=CC=C2)C3=CC=CC=C3	2	K3PO4	toluene	100	6	0
CO037	Table 1	3	O=C(OC(CCCCC)/C=C/C1=CC=CC=C1)OCC	COB(C1=CC=CC=C1)OC.CO[Li]	CCCCCC(C1=CC=CC=C1)/C=C/C2=CC=CC=C2	NiCl2(PPh3)2	10	PPh3	P(C1=CC=CC=C1)(C2=CC=CC=C2)C3=CC=CC=C3	20	N/A	THF	60	15	35
CO038	Table 1	5	CCOC1N(C(OCC)=O)C2=CC=CC=C2C=C1	OB(O)C1=CC=C(C=C1)F	O=C(OCC)N1C2=CC=CC=C2C=CC1C3=CC=C(F)C=C3	NiCl2(PPh3)2	7.5	PPh3	P(C1=CC=CC=C1)(C2=CC=CC=C2)C3=CC=CC=C3	15	N/A	dioxane/tAmOH	40	16	5
CO039	Table 1	1	O=C(OC1=CC=CC=C1)N(CC)CC	CN1C2=CC=CC=C2N=C1	CN1C2=CC=CC=C2N=C1C3=CC=CC=C3	Ni(COD)2	10	dcype	P(CCP(C1CCCCC1)C2CCCCC2)(C3CCCCC3)C4CCCCC4	12	Cs2CO3	dioxane	110	12	0
CO039	Table 1	4	O=C(OC1=CC=CC=C1)N(CC)CC	CN1C2=CC=CC=C2N=C1	CN1C2=CC=CC=C2N=C1C3=CC=CC=C3	Ni(COD)2	10	dcype	P(CCP(C1CCCCC1)C2CCCCC2)(C3CCCCC3)C4CCCCC5	12	K3PO4	dioxane	110	12	0
CO039	Table 1	5	O=C(OC1=CC=CC=C1)N(CC)CC	CN1C2=CC=CC=C2N=C1	CN1C2=CC=CC=C2N=C1C3=CC=CC=C3	Ni(COD)2	10	dcype	P(CCP(C1CCCCC1)C2CCCCC2)(C3CCCCC3)C4CCCCC6	12	K3PO4	DMF	110	12	0
CO039	Table 1	6	O=C(OC1=CC=CC=C1)N(CC)CC	CN1C2=CC=CC=C2N=C1	CN1C2=CC=CC=C2N=C1C3=CC=CC=C3	Ni(COD)2	10	dcype	P(CCP(C1CCCCC1)C2CCCCC2)(C3CCCCC3)C4CCCCC7	12	K3PO4	iPrOH	110	12	0
CO039	Table 1	9	O=C(OC1=CC=CC=C1)N(CC)CC	CN1C2=CC=CC=C2N=C1	CN1C2=CC=CC=C2N=C1C3=CC=CC=C3	Ni(COD)2	10	dcype	P(CCP(C1CCCCC1)C2CCCCC2)(C3CCCCC3)C4CCCCC8	12	tBuOK	tAmOH	110	12	0
CO039	Table 1	10	O=C(OC1=CC=CC=C1)N(CC)CC	CN1C2=CC=CC=C2N=C1	CN1C2=CC=CC=C2N=C1C3=CC=CC=C3	Ni(COD)2	10	PCy3	P(C1CCCCC1)(C2CCCCC2)C3CCCCC3	24	K3PO4	tAmOH	110	12	0
CO039	Table 1	11	O=C(OC1=CC=CC=C1)N(CC)CC	CN1C2=CC=CC=C2N=C1	CN1C2=CC=CC=C2N=C1C3=CC=CC=C3	Ni(COD)2	10	IPr	CC(C)C(C=CC=C1C(C)C)=C1N2[C]N(C3=C(C(C)C)C=CC=C3C(C)C)C=C2	24	K3PO4	tAmOH	110	12	0
CO040	Table 1	9	C=CCO	O=C1C(C(OCC)=O)CCCO1	O=C1C(C(OCC)=O)(C=C)CCCO1	Ni(COD)2	10	N/A	N/A	0	N/A	Et2O	0	19	0
CO043	Table 1	4	CC1=CC=C(OS(C2=CC=C(C)C=C2)(=O)=O)C=C1	OB(O)C1=CC=CC=C1	C12=CC=CC=C1C=C(C3=CC=CC=C3)C=C2	NiCl2(PCy3)2	3	PCy3	P(C1CCCCC1)(C2CCCCC2)C3CCCCC3	12	K3PO4	THF	25	24	12
CO043	Table 1	6	CC1=CC=C(OS(C2=CC=C(C)C=C2)(=O)=O)C=C1	OB(O)C1=CC=CC=C1	C12=CC=CC=C1C=C(C3=CC=CC=C3)C=C2	Ni(COD)2	3	N/A	N/A	0	K3PO4	THF	25	24	0
CO043	Table 1	7	CC1=CC=C(OS(C2=CC=C(C)C=C2)(=O)=O)C=C1	OB(O)C1=CC=CC=C1	C12=CC=CC=C1C=C(C3=CC=CC=C3)C=C2	Ni(COD)2	3	PPh3	P(C1=CC=CC=C1)(C2=CC=CC=C2)C3=CC=CC=C3	12	K3PO4	THF	25	24	17
CO043	Table 1	8	CC1=CC=C(OS(C2=CC=C(C)C=C2)(=O)=O)C=C1	OB(O)C1=CC=CC=C1	C12=CC=CC=C1C=C(C3=CC=CC=C3)C=C2	Ni(COD)2	3	P(o-tolyl)3	CC1=C(P(C2=C(C)C=CC=C2)C3=C(C)C=CC=C3)C=CC=C1	6	K3PO4	THF	25	24	15
CO043	Table 1	9	CC1=CC=C(OS(C2=CC=C(C)C=C2)(=O)=O)C=C1	OB(O)C1=CC=CC=C1	C12=CC=CC=C1C=C(C3=CC=CC=C3)C=C2	Ni(COD)2	3	dppf	C1=CC=C(C=C1)P([C-]2C=CC=C2)C3=CC=CC=C3.C1=CC=C(C=C1)P([C-]2C=CC=C2)C3=CC=CC=C3.[Fe+2]	6	K3PO4	THF	25	24	0
CO043	Table 1	10	CC1=CC=C(OS(C2=CC=C(C)C=C2)(=O)=O)C=C1	OB(O)C1=CC=CC=C1	C12=CC=CC=C1C=C(C3=CC=CC=C3)C=C2	Ni(COD)2	3	L1	CC(C)(P(C1=CC=CC=C1C2=CC=CC=C2)C(C)(C)C)C	6	K3PO4	THF	25	24	0
CO043	Table 1	11	CC1=CC=C(OS(C2=CC=C(C)C=C2)(=O)=O)C=C1	OB(O)C1=CC=CC=C1	C12=CC=CC=C1C=C(C3=CC=CC=C3)C=C2	Ni(COD)2	3	L2	CC(C)(P(C1=CC=CC=C1C2=CC=CC=C2N(C)C)C(C)(C)C)C	6	K3PO4	THF	25	24	15
CO043	Table 1	12	CC1=CC=C(OS(C2=CC=C(C)C=C2)(=O)=O)C=C1	OB(O)C1=CC=CC=C1	C12=CC=CC=C1C=C(C3=CC=CC=C3)C=C2	Ni(COD)2	3	PtBu3	CC(P(C(C)(C)C)C(C)(C)C)(C)C	12	K3PO4	THF	25	24	0
CO043	Table 1	14	CC1=CC=C(OS(C2=CC=C(C)C=C2)(=O)=O)C=C1	OB(O)C1=CC=CC=C1	C12=CC=CC=C1C=C(C3=CC=CC=C3)C=C2	Ni(COD)2	3	PiBu3	CC(C)CP(CC(C)C)CC(C)C	12	K3PO4	THF	25	24	37
CO050	Scheme 3	1	CC(C)(C)C(OC1=CC2=CC=CC=C2C=C1)=O	C12=CC=CC=C1OC=N2	C12=CC=CC=C1OC(C3=CC=C(C=CC=C4)C4=C3)=N2	Ni(COD)2	10	PCy3	P(C1CCCCC1)(C2CCCCC2)C3CCCCC3	40	Cs2CO3	dioxane	120	12	0
CO050	Scheme 3	1	CC(C)(C)C(OC1=CC2=CC=CC=C2C=C1)=O	C12=CC=CC=C1OC=N2	C12=CC=CC=C1OC(C3=CC=C(C=CC=C4)C4=C3)=N2	Ni(COD)2	10	depe	CCP(CCP(CC)CC)CC	20	Cs2CO3	dioxane	120	12	2
CO050	Scheme 3	1	CC(C)(C)C(OC1=CC2=CC=CC=C2C=C1)=O	C12=CC=CC=C1OC=N2	C12=CC=CC=C1OC(C3=CC=C(C=CC=C4)C4=C3)=N2	Ni(COD)2	10	dppe	P(CCP(C1=CC=CC=C1)C2=CC=CC=C2)(C3=CC=CC=C3)C4=CC=CC=C4	20	Cs2CO3	dioxane	120	12	0
CO050	Scheme 3	1	CC(C)(C)C(OC1=CC2=CC=CC=C2C=C1)=O	C12=CC=CC=C1OC=N2	C12=CC=CC=C1OC(C3=CC=C(C=CC=C4)C4=C3)=N2	Ni(COD)2	10	IPr	CC(C)C(C=CC=C1C(C)C)=C1N2[C]N(C3=C(C(C)C)C=CC=C3C(C)C)C=C2	40	Cs2CO3	dioxane	120	12	0
CO050	Scheme 3	1	CC(C)(C)C(OC1=CC2=CC=CC=C2C=C1)=O	C12=CC=CC=C1OC=N2	C12=CC=CC=C1OC(C3=CC=C(C=CC=C4)C4=C3)=N2	Ni(COD)2	10	bpy	C1(C2=NC=CC=C2)=NC=CC=C1	20	Cs2CO3	dioxane	120	12	0
CO055	Table 1	3	OC(CC)C1=CC=CC=C1	COC1=CC=C([Zn]I)C=C1	CCC(C1=CC=C(OC)C=C1)C2=CC=CC=C2	NiBr2•diglyme	9	N/A	N/A	0	N/A	DCM/THF	-45	Unknown	2
CO055	Table 1	4	OC(CC)C1=CC=CC=C1	COC1=CC=C([Zn]I)C=C1	CCC(C1=CC=C(OC)C=C1)C2=CC=CC=C2	NiBr2•diglyme	9	1	CC([C@H]1COC(C2=CC=CC(C3=N[C@@H](C(C)C)CO3)=N2)=N1)C	13	N/A	DCM/THF	-45	Unknown	11
CO055	Table 1	5	OC(CC)C1=CC=CC=C1	COC1=CC=C([Zn]I)C=C1	CCC(C1=CC=C(OC)C=C1)C2=CC=CC=C2	NiBr2•diglyme	9	2	CC(C1=N[C@@H](C(C)C)CO1)(C)C2=N[C@@H](C(C)C)CO2	13	N/A	DCM/THF	-45	Unknown	2
CO058	Table 1	2	COCC1=CC2=CC=CC=C2C=C1	C[Mg]Br	CCC1=CC2=CC=CC=C2C=C1	NiCl2(PCy3)2	10	PCy3	P(C1CCCCC1)(C2CCCCC2)C3CCCCC3	25	N/A	toluene	25	12	9
CO058	Table 1	3	COCC1=CC2=CC=CC=C2C=C1	C[Mg]Br	CCC1=CC2=CC=CC=C2C=C1	NiCl2(PPh3)2	10	PPh3	P(C1=CC=CC=C1)(C2=CC=CC=C2)C3=CC=CC=C3	25	N/A	toluene	25	12	12
CO058	Table 1	4	COCC1=CC2=CC=CC=C2C=C1	C[Mg]Br	CCC1=CC2=CC=CC=C2C=C1	NiCl2(dppe)	5	dppe	P(CCP(C1=CC=CC=C1)C2=CC=CC=C2)(C3=CC=CC=C3)C4=CC=CC=C4	10	N/A	toluene	25	12	0
CO058	Table 1	8	COCC1=CC2=CC=CC=C2C=C1	C[Mg]Br	CCC1=CC2=CC=CC=C2C=C1	Ni(acac)2	5	dppe	P(CCP(C1=CC=CC=C1)C2=CC=CC=C2)(C3=CC=CC=C3)C4=CC=CC=C4	10	N/A	toluene	25	12	0
CO058	Table 1	12	COCC1=CC2=CC=CC=C2C=C1	C[Mg]Br	CCC1=CC2=CC=CC=C2C=C1	NiCl2•6H2O	5	dppf	C1=CC=C(C=C1)P([C-]2C=CC=C2)C3=CC=CC=C3.C1=CC=C(C=C1)P([C-]2C=CC=C2)C3=CC=CC=C3.[Fe+2]	10	N/A	toluene	25	12	14
CO058	Table 1	18	COCC1=CC2=CC=CC=C2C=C1	C[Mg]Br	CCC1=CC2=CC=CC=C2C=C1	NiCl2(dppf)	5	dppf	C1=CC=C(C=C1)P([C-]2C=CC=C2)C3=CC=CC=C3.C1=CC=C(C=C1)P([C-]2C=CC=C2)C3=CC=CC=C3.[Fe+2]	10	N/A	THF	25	12	19
CO059	Table 1	6	O=C(OC1=CC2=CC=CC=C2C=C1)C	B1(C2=CC=CC=C2)OB(C3=CC=CC=C3)OB(C4=CC=CC=C4)O1	C12=CC=CC=C1C=C(C3=CC=CC=C3)C=C2	NiCl2(PCy3)2	10	PCy3	P(C1CCCCC1)(C2CCCCC2)C3CCCCC3	20	KOH	dioxane	110	12	9
CO059	Table 1	7	O=C(OC1=CC2=CC=CC=C2C=C1)C	B1(C2=CC=CC=C2)OB(C3=CC=CC=C3)OB(C4=CC=CC=C4)O1	C12=CC=CC=C1C=C(C3=CC=CC=C3)C=C2	NiCl2(PCy3)2	10	PCy3	P(C1CCCCC1)(C2CCCCC2)C3CCCCC3	20	tBuOK	dioxane	110	12	5
CO059	Table 1	8	O=C(OC1=CC2=CC=CC=C2C=C1)C	B1(C2=CC=CC=C2)OB(C3=CC=CC=C3)OB(C4=CC=CC=C4)O1	C12=CC=CC=C1C=C(C3=CC=CC=C3)C=C2	NiCl2(PCy3)2	10	PCy3	P(C1CCCCC1)(C2CCCCC2)C3CCCCC3	20	K2CO3	dioxane	110	12	29
CO059	Table 1	9	O=C(OC1=CC2=CC=CC=C2C=C1)C	B1(C2=CC=CC=C2)OB(C3=CC=CC=C3)OB(C4=CC=CC=C4)O1	C12=CC=CC=C1C=C(C3=CC=CC=C3)C=C2	NiCl2(PCy3)2	10	PCy3	P(C1CCCCC1)(C2CCCCC2)C3CCCCC3	20	Na2CO3	dioxane	110	12	20
CO059	Table 1	10	O=C(OC1=CC2=CC=CC=C2C=C1)C	B1(C2=CC=CC=C2)OB(C3=CC=CC=C3)OB(C4=CC=CC=C4)O1	C12=CC=CC=C1C=C(C3=CC=CC=C3)C=C2	NiCl2(PCy3)2	10	PCy3	P(C1CCCCC1)(C2CCCCC2)C3CCCCC3	20	K3PO4	dioxane	110	12	23
CO059	Table 1	14	O=C(OC1=CC2=CC=CC=C2C=C1)C	B1(C2=CC=CC=C2)OB(C3=CC=CC=C3)OB(C4=CC=CC=C4)O1	C12=CC=CC=C1C=C(C3=CC=CC=C3)C=C2	NiCl2•6H2O	10	PPh3	P(C1=CC=CC=C1)(C2=CC=CC=C2)C3=CC=CC=C3	20	K3PO4	dioxane	110	12	5
CO059	Table 1	15	O=C(OC1=CC2=CC=CC=C2C=C1)C	B1(C2=CC=CC=C2)OB(C3=CC=CC=C3)OB(C4=CC=CC=C4)O1	C12=CC=CC=C1C=C(C3=CC=CC=C3)C=C2	NiCl2•6H2O	10	dppf	C1=CC=C(C=C1)P([C-]2C=CC=C2)C3=CC=CC=C3.C1=CC=C(C=C1)P([C-]2C=CC=C2)C3=CC=CC=C3.[Fe+2]	20	K3PO4	dioxane	110	12	5
CO059	Table 1	16	O=C(OC1=CC2=CC=CC=C2C=C1)C	B1(C2=CC=CC=C2)OB(C3=CC=CC=C3)OB(C4=CC=CC=C4)O1	C12=CC=CC=C1C=C(C3=CC=CC=C3)C=C2	NiCl2•6H2O	10	PBu3	CCCCP(CCCC)CCCC	20	K3PO4	dioxane	110	12	6
CO059	Table 1	17	O=C(OC1=CC2=CC=CC=C2C=C1)C	B1(C2=CC=CC=C2)OB(C3=CC=CC=C3)OB(C4=CC=CC=C4)O1	C12=CC=CC=C1C=C(C3=CC=CC=C3)C=C2	NiCl2•6H2O	10	PBu3	CCCCP(CCCC)CCCC	20	K3PO4	dioxane	110	12	27
CO059	Table 1	18	O=C(OC1=CC2=CC=CC=C2C=C1)C	B1(C2=CC=CC=C2)OB(C3=CC=CC=C3)OB(C4=CC=CC=C4)O1	C12=CC=CC=C1C=C(C3=CC=CC=C3)C=C2	NiCl2•6H2O	10	P(OMe)3	COP(OC)OC	20	K3PO4	dioxane	110	12	17
CO059	Table 1	20	O=C(OC1=CC2=CC=CC=C2C=C1)C	B1(C2=CC=CC=C2)OB(C3=CC=CC=C3)OB(C4=CC=CC=C4)O1	C12=CC=CC=C1C=C(C3=CC=CC=C3)C=C2	NiCl2(PCy3)2	10	PCy3	P(C1CCCCC1)(C2CCCCC2)C3CCCCC3	20	K3PO4	DCE	110	12	5
CO059	Table 1	21	O=C(OC1=CC2=CC=CC=C2C=C1)C	B1(C2=CC=CC=C2)OB(C3=CC=CC=C3)OB(C4=CC=CC=C4)O1	C12=CC=CC=C1C=C(C3=CC=CC=C3)C=C2	NiCl2(PCy3)2	10	PCy3	P(C1CCCCC1)(C2CCCCC2)C3CCCCC3	20	K3PO4	DMF	110	12	5
CO063	Table 1	1	O=C(OC1=CC2=CC=CC=C2C=C1)N(CC)CC	B1(C2=CC=CC=C2)OB(C3=CC=CC=C3)OB(C4=CC=CC=C4)O1		Ni(COD)2	10	PCy3	P(C1CCCCC1)(C2CCCCC2)C3CCCCC3	10	K3PO4	dioxane	120	20	0
CO063	Table 1	2	O=C(OC1=CC2=CC=CC=C2C=C1)N(CC)CC	B1(C2=CC=CC=C2)OB(C3=CC=CC=C3)OB(C4=CC=CC=C4)O1		NiO	10	PCy3	P(C1CCCCC1)(C2CCCCC2)C3CCCCC3	10	K3PO4	toluene	120	20	0
CO063	Table 1	3	O=C(OC1=CC2=CC=CC=C2C=C1)N(CC)CC	B1(C2=CC=CC=C2)OB(C3=CC=CC=C3)OB(C4=CC=CC=C4)O1		Ni(COD)2	10	PCy3	P(C1CCCCC1)(C2CCCCC2)C3CCCCC3	10	K3PO4	toluene	120	20	0
CO063	Table 1	4	O=C(OC1=CC2=CC=CC=C2C=C1)N(CC)CC	B1(C2=CC=CC=C2)OB(C3=CC=CC=C3)OB(C4=CC=CC=C4)O1		Ni(COD)2	10	PCy3	P(C1CCCCC1)(C2CCCCC2)C3CCCCC3	10	K3PO4	toluene	120	20	11
CO063	Table 1	5	O=C(OC1=CC2=CC=CC=C2C=C1)N(CC)CC	B1(C2=CC=CC=C2)OB(C3=CC=CC=C3)OB(C4=CC=CC=C4)O1		NiCl2(PCy3)2	10	PCy3	P(C1CCCCC1)(C2CCCCC2)C3CCCCC3	40	K3PO4	toluene	120	5	37
CO063	Table 1	6	O=C(OC1=CC2=CC=CC=C2C=C1)N(CC)CC	B1(C2=CC=CC=C2)OB(C3=CC=CC=C3)OB(C4=CC=CC=C4)O1		NiCl2(PCy3)2	10	PCy3	P(C1CCCCC1)(C2CCCCC2)C3CCCCC3	40	K3PO4	o-xylene	150	20	26
CO067	Table 1	1	COC1=CC2=CC=CC=C2C=C1	CCCCC[Mg]Br	CCCCCC1=CC2=CC=CC=C2C=C1	Ni(COD)2	5	PCy3	P(C1CCCCC1)(C2CCCCC2)C3CCCCC3	10	N/A	toluene	80	14	2
CO067	Table 1	2	COC1=CC2=CC=CC=C2C=C1	CCCCC[Mg]Br	CCCCCC1=CC2=CC=CC=C2C=C1	Ni(COD)2	5	ICy	C1(N2[C]N(C=C2)C3CCCCC3)CCCCC1	10	N/A	toluene	80	14	0
CO067	Table 1	3	COC1=CC2=CC=CC=C2C=C1	CCCCC[Mg]Br	CCCCCC1=CC2=CC=CC=C2C=C1	Ni(COD)2	5	IPr	CC(C)C(C=CC=C1C(C)C)=C1N2[C]N(C3=C(C(C)C)C=CC=C3C(C)C)C=C2	10	N/A	toluene	80	14	0
CO067	Table 1	5	COC1=CC2=CC=CC=C2C=C1	CCCCC[Mg]Br	CCCCCC1=CC2=CC=CC=C2C=C1	Ni(COD)2	5	dcypp	P(C1CCCCC1)(C2CCCCC2)CCCP(C3CCCCC3)C4CCCCC4	5	N/A	toluene	80	14	22
CO067	Table 1	6	COC1=CC2=CC=CC=C2C=C1	CCCCC[Mg]Br	CCCCCC1=CC2=CC=CC=C2C=C1	Ni(COD)2	5	dcypb	P(CCCCP(C1CCCCC1)C2CCCCC2)(C3CCCCC3)C4CCCCC4	5	N/A	toluene	80	14	8
CO067	Table 1	7	COC1=CC2=CC=CC=C2C=C1	CCCCC[Mg]Br	CCCCCC1=CC2=CC=CC=C2C=C1	Ni(COD)2	5	dcypf	C1(P(C2CCCCC2)[C-]3C=CC=C3)CCCCC1.C4(P(C5CCCCC5)[C-]6C=CC=C6)CCCCC4.[Fe+3]	5	N/A	toluene	80	14	0
CO068	Table 1	11	CC(OC(C)=O)(CC)C1=CC2=CC=CC=C2C=C1	COC1=CC=CC(B(O2)OB(C3=CC(OC)=CC=C3)OB2C4=CC=CC(OC)=C4)=C1	CC(C1=CC(OC)=CC=C1)(CC)C2=CC3=CC=CC=C3C=C2	NiCl2•DME	5	SIMes	CC1=C(C(C)=CC(C)=C1)N2CCN([C]2)C3=C(C=C(C=C3C)C)C	5	NaOMe	2-Me-THF	40	40	0
CO075	Table 1	2	O=C(O/C(OCC)=C(F)\F)C1=CC=CC=C1	COC1=CC=C(B(O)O)C=C1	F/C(F)=C(OCC)\C1=CC=C(OC)C=C1	Ni(COD)2	10	PPh3	P(C1=CC=CC=C1)(C2=CC=CC=C2)C3=CC=CC=C3	24	K2CO3	dioxane	60	15	5
CO075	Table 1	4	O=C(O/C(OCC)=C(F)\F)C1=CC=CC=C1	COC1=CC=C(B(O)O)C=C1	F/C(F)=C(OCC)\C1=CC=C(OC)C=C1	Ni(COD)2	10	bpy	C1(C2=NC=CC=C2)=NC=CC=C1	12	K2CO3	dioxane	60	15	0
CO075	Table 1	5	O=C(O/C(OCC)=C(F)\F)C1=CC=CC=C1	COC1=CC=C(B(O)O)C=C1	F/C(F)=C(OCC)\C1=CC=C(OC)C=C1	Ni(COD)2	10	dppf	C1=CC=C(C=C1)P([C-]2C=CC=C2)C3=CC=CC=C3.C1=CC=C(C=C1)P([C-]2C=CC=C2)C3=CC=CC=C3.[Fe+2]	12	KOH	dioxane	60	15	0
CO075	Table 1	11	O=C(O/C(OCC)=C(F)\F)C1=CC=CC=C1	COC1=CC=C(B(O)O)C=C1	F/C(F)=C(OCC)\C1=CC=C(OC)C=C1	Ni(COD)2	10	dppf	C1=CC=C(C=C1)P([C-]2C=CC=C2)C3=CC=CC=C3.C1=CC=C(C=C1)P([C-]2C=CC=C2)C3=CC=CC=C3.[Fe+3]	13	KOH	MeCN	60	15	5
CO075	Table 1	12	O=C(O/C(OCC)=C(F)\F)C1=CC=CC=C1	COC1=CC=C(B(O)O)C=C1	F/C(F)=C(OCC)\C1=CC=C(OC)C=C1	Ni(COD)2	10	dppf	C1=CC=C(C=C1)P([C-]2C=CC=C2)C3=CC=CC=C3.C1=CC=C(C=C1)P([C-]2C=CC=C2)C3=CC=CC=C3.[Fe+4]	14	KOH	DMF	60	15	0
CO075	Table 1	15	O=C(O/C(OCC)=C(F)\F)C1=CC=CC=C1	COC1=CC=C(B(O)O)C=C1	F/C(F)=C(OCC)\C1=CC=C(OC)C=C1	NiCl2	10	dppf	C1=CC=C(C=C1)P([C-]2C=CC=C2)C3=CC=CC=C3.C1=CC=C(C=C1)P([C-]2C=CC=C2)C3=CC=CC=C3.[Fe+5]	15	KOH	dioxane	60	15	0
CO079	Table 1	1	OCC1=CC=CC=C1	CC(O)C(O)=O	OC(C(O)=O)CCC1=CC=CC=C1	Ni(OAc)2	5	dppm	P(CP(C1=CC=CC=C1)C2=CC=CC=C2)(C3=CC=CC=C3)C4=CC=CC=C4	5	KOH	tBuOH	100	3	0
CO079	Table 1	2	OCC1=CC=CC=C1	CC(O)C(O)=O	OC(C(O)=O)CCC1=CC=CC=C1	Ni(OAc)2	5	dppm	P(CP(C1=CC=CC=C1)C2=CC=CC=C2)(C3=CC=CC=C3)C4=CC=CC=C4	5	KOH	H2O	120	3	0
CO079	Table 1	3	OCC1=CC=CC=C1	CC(O)C(O)=O	OC(C(O)=O)CCC1=CC=CC=C1	Ni(OAc)2	5	dppm	P(CP(C1=CC=CC=C1)C2=CC=CC=C2)(C3=CC=CC=C3)C4=CC=CC=C4	5	KOH	toluene	120	3	0
CO079	Table 1	4	OCC1=CC=CC=C1	CC(O)C(O)=O	OC(C(O)=O)CCC1=CC=CC=C1	Ni(OAc)2	5	dppm	P(CP(C1=CC=CC=C1)C2=CC=CC=C2)(C3=CC=CC=C3)C4=CC=CC=C4	5	KOH	BuOH	120	3	16
CO079	Table 1	5	OCC1=CC=CC=C1	CC(O)C(O)=O	OC(C(O)=O)CCC1=CC=CC=C1	Ni(OAc)2	5	dppm	P(CP(C1=CC=CC=C1)C2=CC=CC=C2)(C3=CC=CC=C3)C4=CC=CC=C4	5	KOH	ethyl glyme	120	3	13
CO079	Table 1	6	OCC1=CC=CC=C1	CC(O)C(O)=O	OC(C(O)=O)CCC1=CC=CC=C1	Ni(OAc)2	5	dppm	P(CP(C1=CC=CC=C1)C2=CC=CC=C2)(C3=CC=CC=C3)C4=CC=CC=C4	5	KOH	N/A	140	3	20
CO079	Table 1	14	OCC1=CC=CC=C1	CC(O)C(O)=O	OC(C(O)=O)CCC1=CC=CC=C1	Ni(OAc)2	5	N/A	N/A	0	K2CO3	N/A	155	3	8
CO079	Table 1	15	OCC1=CC=CC=C1	CC(O)C(O)=O	OC(C(O)=O)CCC1=CC=CC=C1	Ni(OAc)2	5	N/A	N/A	0	K3PO4	N/A	155	3	12
CO079	Table 1	16	OCC1=CC=CC=C1	CC(O)C(O)=O	OC(C(O)=O)CCC1=CC=CC=C1	Ni(OAc)2	5	N/A	N/A	0	DBU	N/A	155	3	0
CO083	Table 1	2	C=C(C1=CC=CC=C1)OC(C)=O	B1(C2=CC=CC=C2)OB(C3=CC=CC=C3)OB(C4=CC=CC=C4)O1	C=C(C1=CC=CC=C1)C2=CC=CC=C2	NiCl2(PCy3)2	4	PCy3	P(C1CCCCC1)(C2CCCCC2)C3CCCCC3	8	K3PO4	DMF	110	20	0
CO083	Table 1	4	C=C(C1=CC=CC=C1)OC(C)=O	B1(C2=CC=CC=C2)OB(C3=CC=CC=C3)OB(C4=CC=CC=C4)O1	C=C(C1=CC=CC=C1)C2=CC=CC=C2	NiCl2(PCy3)2	4	PCy3	P(C1CCCCC1)(C2CCCCC2)C3CCCCC3	8	K3PO4	dioxane	110	20	36
CO083	Table 1	6	C=C(C1=CC=CC=C1)OC(C)=O	B1(C2=CC=CC=C2)OB(C3=CC=CC=C3)OB(C4=CC=CC=C4)O1	C=C(C1=CC=CC=C1)C2=CC=CC=C2	NiCl2(PPh3)2	4	PPh3	P(C1=CC=CC=C1)(C2=CC=CC=C2)C3=CC=CC=C3	8	K3PO4	toluene/dioxane	110	20	0
CO083	Table 1	7	C=C(C1=CC=CC=C1)OC(C)=O	B1(C2=CC=CC=C2)OB(C3=CC=CC=C3)OB(C4=CC=CC=C4)O1	C=C(C1=CC=CC=C1)C2=CC=CC=C2	NiCl2(dppe)	4	dppe	P(CCP(C1=CC=CC=C1)C2=CC=CC=C2)(C3=CC=CC=C3)C4=CC=CC=C4	4	K3PO4	toluene/dioxane	110	20	35
CO083	Table 1	10	C=C(C1=CC=CC=C1)OC(C)=O	B1(C2=CC=CC=C2)OB(C3=CC=CC=C3)OB(C4=CC=CC=C4)O1	C=C(C1=CC=CC=C1)C2=CC=CC=C2	Ni(COD)2	4	N/A	N/A	0	K3PO4	toluene/dioxane	110	20	0
CO083	Table 1	14	C=C(C1=CC=CC=C1)OC(C)=O	B1(C2=CC=CC=C2)OB(C3=CC=CC=C3)OB(C4=CC=CC=C4)O1	C=C(C1=CC=CC=C1)C2=CC=CC=C2	NiCl2(PCy3)2	4	PCy3	P(C1CCCCC1)(C2CCCCC2)C3CCCCC3	8	K3PO4	toluene/dioxane	110	20	18
CO083	Table 1	19	C=C(C1=CC=CC=C1)OC(C)=O	B1(C2=CC=CC=C2)OB(C3=CC=CC=C3)OB(C4=CC=CC=C4)O1	C=C(C1=CC=CC=C1)C2=CC=CC=C2	NiCl2(PCy3)2	4	PCy3	P(C1CCCCC1)(C2CCCCC2)C3CCCCC3	8	Cs2CO3	toluene/dioxane	110	20	0
CO083	Table 1	20	C=C(C1=CC=CC=C1)OC(C)=O	B1(C2=CC=CC=C2)OB(C3=CC=CC=C3)OB(C4=CC=CC=C4)O1	C=C(C1=CC=CC=C1)C2=CC=CC=C2	NiCl2(PCy3)2	4	PCy3	P(C1CCCCC1)(C2CCCCC2)C3CCCCC3	8	CsF	toluene/dioxane	110	20	0
CO083	Table 1	21	C=C(C1=CC=CC=C1)OC(C)=O	B1(C2=CC=CC=C2)OB(C3=CC=CC=C3)OB(C4=CC=CC=C4)O1	C=C(C1=CC=CC=C1)C2=CC=CC=C2	NiCl2(PCy3)2	4	PCy3	P(C1CCCCC1)(C2CCCCC2)C3CCCCC3	8	tBuOK	toluene/dioxane	110	20	0
CO083	Table 1	22	C=C(C1=CC=CC=C1)OC(C)=O	B1(C2=CC=CC=C2)OB(C3=CC=CC=C3)OB(C4=CC=CC=C4)O1	C=C(C1=CC=CC=C1)C2=CC=CC=C2	NiCl2(PCy3)2	4	PCy3	P(C1CCCCC1)(C2CCCCC2)C3CCCCC3	8	N/A	toluene/dioxane	110	20	0
CO086	Table 1	14	COC1=CC2=CC=CC=C2C=C1	CC1=CC=C([Mg]Br)C=C1	CC(C=C1)=CC=C1C2=CC3=CC=CC=C3C=C2	Ni(COD)2	10	N/A	N/A	10	N/A	m-xylene	100	4	5
CO088	Table 1	1	COC1=CC=C(OS(C2=CC=C(C)C=C2)(=O)=O)C=C1	OB(O)C1=CC=CC=C1	COC1=CC=C(C2=CC=CC=C2)C=C1	Ni(acac)2	5	PPh3	P(C1=CC=CC=C1)(C2=CC=CC=C2)C3=CC=CC=C3	5	K2CO3	toluene	100	5	5
CO088	Table 1	9	COC1=CC=C(OS(C2=CC=C(C)C=C2)(=O)=O)C=C1	OB(O)C1=CC=CC=C1	COC1=CC=C(C2=CC=CC=C2)C=C1	3	5	bpy	C1(C2=NC=CC=C2)=NC=CC=C1	2.5	K2CO3	toluene	100	5	16
CO088	Table 1	10	COC1=CC=C(OS(C2=CC=C(C)C=C2)(=O)=O)C=C1	OB(O)C1=CC=CC=C1	COC1=CC=C(C2=CC=CC=C2)C=C1	3	5	Phen	C12=CC=C3C=CC=NC3=C1N=CC=C2	2.5	K2CO3	toluene	100	5	8
CO088	Table 1	12	COC1=CC=C(OS(C2=CC=C(C)C=C2)(=O)=O)C=C1	OB(O)C1=CC=CC=C1	COC1=CC=C(C2=CC=CC=C2)C=C1	3	5	PPh3	P(C1=CC=CC=C1)(C2=CC=CC=C2)C3=CC=CC=C3	5	KOH	toluene	100	5	26
CO088	Table 1	13	COC1=CC=C(OS(C2=CC=C(C)C=C2)(=O)=O)C=C1	OB(O)C1=CC=CC=C1	COC1=CC=C(C2=CC=CC=C2)C=C1	3	5	PPh3	P(C1=CC=CC=C1)(C2=CC=CC=C2)C3=CC=CC=C3	5	Na2CO3	toluene	100	5	20
CO088	Table 1	14	COC1=CC=C(OS(C2=CC=C(C)C=C2)(=O)=O)C=C1	OB(O)C1=CC=CC=C1	COC1=CC=C(C2=CC=CC=C2)C=C1	3	5	PPh3	P(C1=CC=CC=C1)(C2=CC=CC=C2)C3=CC=CC=C3	5	K2CO3	toluene	100	5	36
CO088	Table 1	15	COC1=CC=C(OS(C2=CC=C(C)C=C2)(=O)=O)C=C1	OB(O)C1=CC=CC=C1	COC1=CC=C(C2=CC=CC=C2)C=C1	3	5	PPh3	P(C1=CC=CC=C1)(C2=CC=CC=C2)C3=CC=CC=C3	5	K2CO3	THF	70	5	6
CO089	Table 1	8	CC1=CC(OS(C2=CC=C(C)C=C2)(=O)=O)=CC=C1	OB(O)C1=CC=CC=C1	CC1=CC(C2=CC=CC=C2)=CC=C1	NiCl2•6H2O	5	PCy3	P(C1CCCCC1)(C2CCCCC2)C3CCCCC3	7.5	K2CO3	toluene	23	24	0
CO089	Table 1	9	CC1=CC(OS(C2=CC=C(C)C=C2)(=O)=O)=CC=C1	OB(O)C1=CC=CC=C1	CC1=CC(C2=CC=CC=C2)=CC=C1	Ni(acac)2	5	PCy3	P(C1CCCCC1)(C2CCCCC2)C3CCCCC3	7.5	K2CO3	toluene	23	24	0
CO089	Table 1	10	CC1=CC(OS(C2=CC=C(C)C=C2)(=O)=O)=CC=C1	OB(O)C1=CC=CC=C1	CC1=CC(C2=CC=CC=C2)=CC=C1	NiCl2(PPh3)2	5	PCy3	P(C1CCCCC1)(C2CCCCC2)C3CCCCC3	7.5	K2CO3	toluene	23	24	0
CO089	Table 1	13	CC1=CC(OS(C2=CC=C(C)C=C2)(=O)=O)=CC=C1	OB(O)C1=CC=CC=C1	CC1=CC(C2=CC=CC=C2)=CC=C1	C-1	5	IPr	CC(C)C(C=CC=C1C(C)C)=C1N2[C]N(C3=C(C(C)C)C=CC=C3C(C)C)C=C2	5	K2CO3	toluene	23	24	35
CO089	Table 1	14	CC1=CC(OS(C2=CC=C(C)C=C2)(=O)=O)=CC=C1	OB(O)C1=CC=CC=C1	CC1=CC(C2=CC=CC=C2)=CC=C1	C-1	5	bpy	C1(C2=NC=CC=C2)=NC=CC=C1	5	K2CO3	toluene	23	24	5
CO089	Table 1	15	CC1=CC(OS(C2=CC=C(C)C=C2)(=O)=O)=CC=C1	OB(O)C1=CC=CC=C1	CC1=CC(C2=CC=CC=C2)=CC=C1	C-1	5	Phen	C12=CC=C3C=CC=NC3=C1N=CC=C2	5	K2CO3	toluene	23	24	5
CO089	Table 1	18	CC1=CC(OS(C2=CC=C(C)C=C2)(=O)=O)=CC=C1	OB(O)C1=CC=CC=C1	CC1=CC(C2=CC=CC=C2)=CC=C1	C-1	5	PCy3	P(C1CCCCC1)(C2CCCCC2)C3CCCCC3	7.5	KOH	toluene	23	24	trace
CO092	Table 2	1	O=C(OC1=CC2=CC=CC=C2C=C1)N(CC)CC	CC(CO1)(C)COB1C2=CC=CC=C2	C12=C(C=CC=C2)C=C(C3=CC=CC=C3)C=C1	Ni(COD)2	10	PCy3	P(C1CCCCC1)(C2CCCCC2)C3CCCCC3	40	K3PO4	toluene	120	24	9
CO092	Table 2	2	O=C(OC1=CC2=CC=CC=C2C=C1)N(CC)CC	CC(CO1)(C)COB1C2=CC=CC=C2	C12=C(C=CC=C2)C=C(C3=CC=CC=C3)C=C1	Ni(COD)2	10	IMes	CC1=C(N2C=CN(C3=C(C)C=C(C)C=C3C)[C]2)C(C)=CC(C)=C1	40	K3PO4	toluene	120	24	0
CO092	Table 2	3	O=C(OC1=CC2=CC=CC=C2C=C1)N(CC)CC	CC(CO1)(C)COB1C2=CC=CC=C2	C12=C(C=CC=C2)C=C(C3=CC=CC=C3)C=C1	Ni(COD)2	10	IPr	CC(C)C(C=CC=C1C(C)C)=C1N2[C]N(C3=C(C(C)C)C=CC=C3C(C)C)C=C2	40	K3PO4	toluene	120	24	3
CO092	Table 2	4	O=C(OC1=CC2=CC=CC=C2C=C1)N(CC)CC	CC(CO1)(C)COB1C2=CC=CC=C2	C12=C(C=CC=C2)C=C(C3=CC=CC=C3)C=C1	Ni(COD)2	10	ICy	C1(N2[C]N(C=C2)C3CCCCC3)CCCCC1	40	K3PO4	toluene	120	24	11
CO092	Table 2	5	O=C(OC1=CC2=CC=CC=C2C=C1)N(CC)CC	CC(CO1)(C)COB1C2=CC=CC=C2	C12=C(C=CC=C2)C=C(C3=CC=CC=C3)C=C1	Ni(COD)2	10	L4	N1([C]N([C@@]2(C[C@@H](C3)C4)C[C@H]3C[C@H]4C2)C=C1)C5(CC(C6)C7)CC6CC7C5	40	K3PO4	toluene	120	24	27
CO093	Table 1	10	OC/C=C/C1=CC=CC=C1	CN(C1=CC=C([Zn]Cl)C=C1)C	CN(C(C=C1)=CC=C1C/C=C/C2=CC=CC=C2)C	NiCl2(PCy3)2	10	PCy3	P(C1CCCCC1)(C2CCCCC2)C3CCCCC3	20	N/A	toluene/iPr2O	120	24	17
CO093	Table 1	23	OC/C=C/C1=CC=CC=C1	CN(C1=CC=C([Zn]Cl)C=C1)C	CN(C(C=C1)=CC=C1C/C=C/C2=CC=CC=C2)C	Ni(OTf)2	10	dppe	P(CCP(C1=CC=CC=C1)C2=CC=CC=C2)(C3=CC=CC=C3)C4=CC=CC=C4	10	N/A	iPr2O	120	24	35
CO093	Table 1	24	OC/C=C/C1=CC=CC=C1	CN(C1=CC=C([Zn]Cl)C=C1)C	CN(C(C=C1)=CC=C1C/C=C/C2=CC=CC=C2)C	Ni(OTf)2	10	dppe	P(CCP(C1=CC=CC=C1)C2=CC=CC=C2)(C3=CC=CC=C3)C4=CC=CC=C4	10	N/A	THF	120	24	8
CO093	Table 1	26	OC/C=C/C1=CC=CC=C1	CN(C1=CC=C([Zn]Cl)C=C1)C	CN(C(C=C1)=CC=C1C/C=C/C2=CC=CC=C2)C	Ni(OTf)2	10	dppe	P(CCP(C1=CC=CC=C1)C2=CC=CC=C2)(C3=CC=CC=C3)C4=CC=CC=C4	10	N/A	dioxane	120	24	23
CO093	Table 1	27	OC/C=C/C1=CC=CC=C1	CN(C1=CC=C([Zn]Cl)C=C1)C	CN(C(C=C1)=CC=C1C/C=C/C2=CC=CC=C2)C	Ni(OTf)2	10	dppe	P(CCP(C1=CC=CC=C1)C2=CC=CC=C2)(C3=CC=CC=C3)C4=CC=CC=C4	10	N/A	NMP	120	24	trace
CO097	Table 1	7	O=C(C1=CC=C(OS(C)(=O)=O)C=C1)OC	OB(O)C1=CC=CC=C1	O=C(C1=CC=C(C2=CC=CC=C2)C=C1)OC	NiCl2(PPh3)2	5	PPh3	P(C1=CC=CC=C1)(C2=CC=CC=C2)C3=CC=CC=C3	20	K3PO4	dioxane	80	14	18
CO097	Table 1	10	O=C(C1=CC=C(OS(C)(=O)=O)C=C1)OC	OB(O)C1=CC=CC=C1	O=C(C1=CC=C(C2=CC=CC=C2)C=C1)OC	NiCl2(dppf)	5	PPh3	P(C1=CC=CC=C1)(C2=CC=CC=C2)C3=CC=CC=C3	10	K3PO4	toluene	80	14	12
CO097	Table 1	12	O=C(C1=CC=C(OS(C2=CC=C(C)C=C2)(=O)=O)C=C1)OC	OB(O)C1=CC=CC=C1	O=C(C1=CC=C(C2=CC=CC=C2)C=C1)OC	NiCl2(PPh3)2	5	PPh3	P(CCP(C1=CC=CC=C1)C2=CC=CC=C2)(C3=CC=CC=C3)C4=CC=CC=C4	20	K3PO4	dioxane	80	14	24
CO097	Table 1	14	O=C(C1=CC=C(OS(C2=CC=C(C)C=C2)(=O)=O)C=C1)OC	OB(O)C1=CC=CC=C1	O=C(C1=CC=C(C2=CC=CC=C2)C=C1)OC	NiCl2(dppb)	5	dppb	P(CCCCP(C1=CC=CC=C1)C2=CC=CC=C2)(C3=CC=CC=C3)C4=CC=CC=C4	10	K3PO4	toluene	80	14	trace
CO097	Table 1	15	O=C(C1=CC=C(OS(C2=CC=C(C)C=C2)(=O)=O)C=C1)OC	OB(O)C1=CC=CC=C1	O=C(C1=CC=C(C2=CC=CC=C2)C=C1)OC	NiCl2(dppf)	5	dppf	C1=CC=C(C=C1)P([C-]2C=CC=C2)C3=CC=CC=C3.C1=CC=C(C=C1)P([C-]2C=CC=C2)C3=CC=CC=C3.[Fe+2]	10	K3PO4	toluene	80	14	20
CO100	Table 1	1	O=P(OCC)(OCC)OC1=CC2=CC=CC=C2C=C1	OB(O)C1=CC=CC=C1	C12=CC=CC=C1C=C(C3=CC=CC=C3)C=C2	NiCl2(dppe)	10	dppe	P(CCP(C1=CC=CC=C1)C2=CC=CC=C2)(C3=CC=CC=C3)C4=CC=CC=C4	10	K3PO4	dioxane	110	24	38
CO100	Table 1	5	O=P(OCC)(OCC)OC1=CC2=CC=CC=C2C=C1	OB(O)C1=CC=CC=C1	C12=CC=CC=C1C=C(C3=CC=CC=C3)C=C2	NiCl2(PPh3)2	10	PPh3	P(CCP(C1=CC=CC=C1)C2=CC=CC=C2)(C3=CC=CC=C3)C4=CC=CC=C4	20	K3PO4	dioxane	110	24	20
CO100	Table 1	12	O=P(OCC)(OCC)OC1=CC2=CC=CC=C2C=C1	OB(O)C1=CC=CC=C1	C12=CC=CC=C1C=C(C3=CC=CC=C3)C=C2	NiCl2(PCy3)2	10	PCy3	P(C1CCCCC1)(C2CCCCC2)C3CCCCC3	20	tBuOK	dioxane	110	24	0
CO100	Table 1	13	O=P(OCC)(OCC)OC1=CC2=CC=CC=C2C=C1	OB(O)C1=CC=CC=C1	C12=CC=CC=C1C=C(C3=CC=CC=C3)C=C2	NiCl2(PCy3)2	10	PCy3	P(C1CCCCC1)(C2CCCCC2)C3CCCCC3	20	Cs2CO3	dioxane	110	24	trace
CO105	Table 1	1	COC1=CC=C(OC2=NC(OC)=NC(OC)=N2)C=C1	OB(O)C1=CC=CC=C1	COC1=CC=C(C2=CC=CC=C2)C=C1	NiCl2(PCy3)2	5	PCy3	P(C1CCCCC1)(C2CCCCC2)C3CCCCC3	10	K2CO3	toluene	110	24	0
CO105	Table 1	2	COC1=CC=C(OC2=NC(OC)=NC(OC)=N2)C=C1	OB(O)C1=CC=CC=C1	COC1=CC=C(C2=CC=CC=C2)C=C1	NiCl2(PCy3)2	5	PCy3	P(C1CCCCC1)(C2CCCCC2)C3CCCCC3	10	Cs2CO3	toluene	110	24	0
CO105	Table 1	3	COC1=CC=C(OC2=NC(OC)=NC(OC)=N2)C=C1	OB(O)C1=CC=CC=C1	COC1=CC=C(C2=CC=CC=C2)C=C1	NiCl2(PCy3)2	5	PCy3	P(C1CCCCC1)(C2CCCCC2)C3CCCCC3	10	KF	toluene	110	24	5
CO105	Table 1	4	COC1=CC=C(OC2=NC(OC)=NC(OC)=N2)C=C1	OB(O)C1=CC=CC=C1	COC1=CC=C(C2=CC=CC=C2)C=C1	NiCl2(PCy3)2	5	PCy3	P(C1CCCCC1)(C2CCCCC2)C3CCCCC3	10	tBuOK	toluene	110	24	5
CO105	Table 1	5	COC1=CC=C(OC2=NC(OC)=NC(OC)=N2)C=C1	OB(O)C1=CC=CC=C1	COC1=CC=C(C2=CC=CC=C2)C=C1	NiCl2(PCy3)2	5	PCy3	P(C1CCCCC1)(C2CCCCC2)C3CCCCC3	10	K3PO4	toluene	110	24	0
CO105	Table 1	7	COC1=CC=C(OC2=NC(OC)=NC(OC)=N2)C=C1	OB(O)C1=CC=CC=C1	COC1=CC=C(C2=CC=CC=C2)C=C1	NiCl2(PCy3)2	5	PCy3	P(C1CCCCC1)(C2CCCCC2)C3CCCCC3	10	K3PO4	dioxane	110	24	5
CO105	Table 1	8	COC1=CC=C(OC2=NC(OC)=NC(OC)=N2)C=C1	OB(O)C1=CC=CC=C1	COC1=CC=C(C2=CC=CC=C2)C=C1	NiCl2(PCy3)2	5	PCy3	P(C1CCCCC1)(C2CCCCC2)C3CCCCC3	10	K3PO4	DME	80	24	0
CO105	Table 1	9	COC1=CC=C(OC2=NC(OC)=NC(OC)=N2)C=C1	OB(O)C1=CC=CC=C1	COC1=CC=C(C2=CC=CC=C2)C=C1	NiCl2(PCy3)2	5	PCy3	P(C1CCCCC1)(C2CCCCC2)C3CCCCC3	10	K3PO4	DMA	130	24	0
CO105	Table 1	10	COC1=CC=C(OC2=NC(OC)=NC(OC)=N2)C=C1	OB(O)C1=CC=CC=C1	COC1=CC=C(C2=CC=CC=C2)C=C1	NiCl2(PCy3)2	5	PCy3	P(C1CCCCC1)(C2CCCCC2)C3CCCCC3	10	K3PO4	tBuOH	110	24	20
CO105	Table 1	12	COC1=CC=C(OC2=NC(OC)=NC(OC)=N2)C=C1	OB(O)C1=CC=CC=C1	COC1=CC=C(C2=CC=CC=C2)C=C1	NiCl2(dppe)	5	dppe	P(CCP(C1=CC=CC=C1)C2=CC=CC=C2)(C3=CC=CC=C3)C4=CC=CC=C4	5	K3PO4	toluene	110	24	38
CO105	Table 1	14	COC1=CC=C(OC2=NC(OC)=NC(OC)=N2)C=C1	OB(O)C1=CC=CC=C1	COC1=CC=C(C2=CC=CC=C2)C=C1	NiCl2(dppb)	5	dppb	P(CCCCP(C1=CC=CC=C1)C2=CC=CC=C2)(C3=CC=CC=C3)C4=CC=CC=C4	5	K3PO4	toluene	110	24	5
CO105	Table 1	16	COC1=CC=C(OC2=NC(OC)=NC(OC)=N2)C=C1	OB(O)C1=CC=CC=C1	COC1=CC=C(C2=CC=CC=C2)C=C1	NiCl2(dppf)	5	dppf	C1=CC=C(C=C1)P([C-]2C=CC=C2)C3=CC=CC=C3.C1=CC=C(C=C1)P([C-]2C=CC=C2)C3=CC=CC=C3.[Fe+2]	5	K3PO4	toluene	110	24	5
CO107	Table 1	1	CCC(OC(OCC)=O)/C=C/C1=CC=CC=C1	COB(C#CC1=CC=CC=C1)OC.CO[Li]	CCC(C#CC1=CC=CC=C1)/C=C/C2=CC=CC=C2	NiCl2(PPh3)2	3	PPh3	P(CCP(C1=CC=CC=C1)C2=CC=CC=C2)(C3=CC=CC=C3)C4=CC=CC=C4	3	N/A	THF	60	12	trace
CO107	Table 1	2	CCC(OC(OCC)=O)/C=C/C1=CC=CC=C1	COB(C#CC1=CC=CC=C1)OC.CO[Li]	CCC(C#CC1=CC=CC=C1)/C=C/C2=CC=CC=C2	NiCl2(dppf)	3	dppf	C1=CC=C(C=C1)P([C-]2C=CC=C2)C3=CC=CC=C3.C1=CC=C(C=C1)P([C-]2C=CC=C2)C3=CC=CC=C3.[Fe+2]	3	N/A	THF	60	12	trace
CO107	Table 1	3	CCC(OC(OCC)=O)/C=C/C1=CC=CC=C1	COB(C#CC1=CC=CC=C1)OC.CO[Li]	CCC(C#CC1=CC=CC=C1)/C=C/C2=CC=CC=C2	NiCl2(dppp)	3	dppp	P(CCCP(C1=CC=CC=C1)C2=CC=CC=C2)(C3=CC=CC=C3)C4=CC=CC=C4	3	N/A	THF	60	12	trace
CO111	Table 1	1	CC(C1=CC=C(OC)C=C1)(C)C	C[Si](C)(C[Mg]Cl)C	CC(C1=CC=C(C[Si](C)(C)C)C=C1)(C)C	Ni(OAc)2	5	PCy3	P(C1CCCCC1)(C2CCCCC2)C3CCCCC3	10	N/A	toluene	24	18	0
CO111	Table 1	2	CC(C1=CC=C(OC)C=C1)(C)C	C[Si](C)(C[Mg]Cl)C	CC(C1=CC=C(C[Si](C)(C)C)C=C1)(C)C	Ni(OAc)2	5	IMes	CC1=C(N2C=CN(C3=C(C)C=C(C)C=C3C)[C]2)C(C)=CC(C)=C1	10	N/A	toluene	24	18	0
CO111	Table 1	3	CC(C1=CC=C(OC)C=C1)(C)C	C[Si](C)(C[Mg]Cl)C	CC(C1=CC=C(C[Si](C)(C)C)C=C1)(C)C	Ni(OAc)2	5	IPr	CC(C)C(C=CC=C1C(C)C)=C1N2[C]N(C3=C(C(C)C)C=CC=C3C(C)C)C=C2	10	N/A	toluene	24	18	0
CO111	Table 1	4	CC(C1=CC=C(OC)C=C1)(C)C	C[Si](C)(C[Mg]Cl)C	CC(C1=CC=C(C[Si](C)(C)C)C=C1)(C)C	Ni(OAc)2	5	IMe	CN1C=CN([C]1)C	10	N/A	toluene	24	18	4
CO111	Table 1	5	CC(C1=CC=C(OC)C=C1)(C)C	C[Si](C)(C[Mg]Cl)C	CC(C1=CC=C(C[Si](C)(C)C)C=C1)(C)C	Ni(OAc)2	5	IiPr	CC(C)N([C]1)C=CN1C(C)C	10	N/A	toluene	24	18	29
CO111	Table 1	7	CC(C1=CC=C(OC)C=C1)(C)C	C[Si](C)(C[Mg]Cl)C	CC(C1=CC=C(C[Si](C)(C)C)C=C1)(C)C	Ni(OAc)2	5	ItBu	CC(N1C=CN(C(C)(C)C)[C]1)(C)C	10	N/A	toluene	24	18	0
CO118	Table 1	2	O=C(N(C(C1=CC=C(C)C=C1)OC)CC2=CC=CC=C2)C3=CC=CC=C3	N/A	O=C1C2=CC=CC=C2C(C3=CC=C(C)C=C3)N1CC4=CC=CC=C4	Ni(COD)2	10	P(o-tolyl)3	CC1=C(P(C2=C(C)C=CC=C2)C3=C(C)C=CC=C3)C=CC=C1	22	N/A	toluene	110	4	31
CO118	Table 1	3	O=C(N(C(C1=CC=C(C)C=C1)OC)CC2=CC=CC=C2)C3=CC=CC=C3	N/A	O=C1C2=CC=CC=C2C(C3=CC=C(C)C=C3)N1CC4=CC=CC=C4	Ni(COD)2	10	PPh2Cy	P(C1=CC=CC=C1)(C2=CC=CC=C2)C3CCCCC3	22	N/A	toluene	110	4	35
CO118	Table 1	4	O=C(N(C(C1=CC=C(C)C=C1)OC)CC2=CC=CC=C2)C3=CC=CC=C3	N/A	O=C1C2=CC=CC=C2C(C3=CC=C(C)C=C3)N1CC4=CC=CC=C4	Ni(COD)2	10	bpy	C1(C2=NC=CC=C2)=NC=CC=C1	12	N/A	toluene	110	4	37
CO118	Table 1	5	O=C(N(C(C1=CC=C(C)C=C1)OC)CC2=CC=CC=C2)C3=CC=CC=C3	N/A	O=C1C2=CC=CC=C2C(C3=CC=C(C)C=C3)N1CC4=CC=CC=C4	Ni(COD)2	10	dppp	P(CCCP(C1=CC=CC=C1)C2=CC=CC=C2)(C3=CC=CC=C3)C4=CC=CC=C4	12	N/A	toluene	110	4	36
CO118	Table 1	13	O=C(N(C(C1=CC=C(C)C=C1)OC)CC2=CC=CC=C2)C3=CC=CC=C3	N/A	O=C1C2=CC=CC=C2C(C3=CC=C(C)C=C3)N1CC4=CC=CC=C4	NiCl2•DME	10	P(o-tolyl)3	CC1=C(P(C2=C(C)C=CC=C2)C3=C(C)C=CC=C3)C=CC=C1	22	N/A	toluene	110	4	0
CO119	Table 1	1	CC(C)(C)C(OC1=CC2=CC=CC=C2C=C1)=O	C=CC1=CC=CC=C1	C12=CC=CC=C1C=C(/C=C/C3=CC=CC=C3)C=C2	Ni(COD)2	10	PCy3	P(C1CCCCC1)(C2CCCCC2)C3CCCCC3	24	K2CO3	toluene	110	24	1
CO119	Table 1	2	CC(C)(C)C(OC1=CC2=CC=CC=C2C=C1)=O	C=CC1=CC=CC=C1	C12=CC=CC=C1C=C(/C=C/C3=CC=CC=C3)C=C2	Ni(COD)2	10	PPh3	P(CCP(C1=CC=CC=C1)C2=CC=CC=C2)(C3=CC=CC=C3)C4=CC=CC=C4	24	K2CO3	toluene	110	24	1
CO119	Table 1	3	CC(C)(C)C(OC1=CC2=CC=CC=C2C=C1)=O	C=CC1=CC=CC=C1	C12=CC=CC=C1C=C(/C=C/C3=CC=CC=C3)C=C2	Ni(COD)2	5	bpy	C1(C2=NC=CC=C2)=NC=CC=C1	12	K2CO3	toluene	110	24	1
CO119	Table 1	4	CC(C)(C)C(OC1=CC2=CC=CC=C2C=C1)=O	C=CC1=CC=CC=C1	C12=CC=CC=C1C=C(/C=C/C3=CC=CC=C3)C=C2	Ni(COD)2	10	BINAP	C1(C2=C3C=CC=CC3=CC=C2P(C4=CC=CC=C4)C5=CC=CC=C5)=C6C=CC=CC6=CC=C1P(C7=CC=CC=C7)C8=CC=CC=C8	12	K2CO3	toluene	110	24	12
CO119	Table 1	5	CC(C)(C)C(OC1=CC2=CC=CC=C2C=C1)=O	C=CC1=CC=CC=C1	C12=CC=CC=C1C=C(/C=C/C3=CC=CC=C3)C=C2	Ni(COD)2	10	BINAP	C1(C2=C3C=CC=CC3=CC=C2P(C4=CC=CC=C4)C5=CC=CC=C5)=C6C=CC=CC6=CC=C1P(C7=CC=CC=C7)C8=CC=CC=C8	12	K3PO4	toluene	110	24	26
CO119	Table 1	8	CC(C)(C)C(OC1=CC2=CC=CC=C2C=C1)=O	C=CC1=CC=CC=C1	C12=CC=CC=C1C=C(/C=C/C3=CC=CC=C3)C=C2	Ni(COD)2	10	PCy3	P(C1CCCCC1)(C2CCCCC2)C3CCCCC3	24	K3PO4	toluene	125	24	28
CO119	Table 1	9	CC(C)(C)C(OC1=CC2=CC=CC=C2C=C1)=O	C=CC1=CC=CC=C1	C12=CC=CC=C1C=C(/C=C/C3=CC=CC=C3)C=C2	Ni(COD)2	10	dppf	C1=CC=C(C=C1)P([C-]2C=CC=C2)C3=CC=CC=C3.C1=CC=C(C=C1)P([C-]2C=CC=C2)C3=CC=CC=C3.[Fe+2]	12	K3PO4	Bu2O	125	24	12
CO121	Table 1	1	COC(C1=CC=CC=C1)C2=CC=CC=C2	C[Mg]I	CC(C1=CC=CC=C1)C2=CC=CC=C2	Ni(COD)2	5	DPEPhos	C1(P(C2=CC=CC=C2)C3=CC=CC=C3)=CC=CC=C1OC4=CC=CC=C4P(C5=CC=CC=C5)C6=CC=CC=C6	10	N/A	toluene	24	22	10
CO121	Table 1	2	COCOC(C1=CC=CC=C1)C2=CC=CC=C2	C[Mg]I	CC(C1=CC=CC=C1)C2=CC=CC=C2	Ni(COD)2	5	DPEPhos	C1(P(C2=CC=CC=C2)C3=CC=CC=C3)=CC=CC=C1OC4=CC=CC=C4P(C5=CC=CC=C5)C6=CC=CC=C6	10	N/A	toluene	24	22	16
CO121	Table 1	3	COCCOCOC(C1=CC=CC=C1)C2=CC=CC=C2	C[Mg]I	CC(C1=CC=CC=C1)C2=CC=CC=C2	Ni(COD)2	5	DPEPhos	C1(P(C2=CC=CC=C2)C3=CC=CC=C3)=CC=CC=C1OC4=CC=CC=C4P(C5=CC=CC=C5)C6=CC=CC=C6	10	N/A	toluene	24	22	10
CO121	Table 1	5	COCCOC(C1=CC=CC=C1)C2=CC=CC=C2	C[Mg]I	CC(C1=CC=CC=C1)C2=CC=CC=C2	Ni(COD)2	5	BINAP	C1(C2=C3C=CC=CC3=CC=C2P(C4=CC=CC=C4)C5=CC=CC=C5)=C6C=CC=CC6=CC=C1P(C7=CC=CC=C7)C8=CC=CC=C8	10	N/A	toluene	24	22	5
CO121	Table 1	6	COCCOC(C1=CC=CC=C1)C2=CC=CC=C2	C[Mg]I	CC(C1=CC=CC=C1)C2=CC=CC=C2	Ni(COD)2	5	dppb	P(CCCCP(C1=CC=CC=C1)C2=CC=CC=C2)(C3=CC=CC=C3)C4=CC=CC=C4	10	N/A	toluene	24	22	5
CO126	Table 1	4	CC(OC(C(C)(C)C)=O)/C=C/C1=CC=CC=C1	B1(C2=CC=CC=C2)OB(C3=CC=CC=C3)OB(C4=CC=CC=C4)O1	CC(C1=CC=CC=C1)/C=C/C2=CC=CC=C2	Ni(COD)2	10	Xantphos	CC1(C)C2=C(OC3=C1C=CC=C3P(C4=CC=CC=C4)C5=CC=CC=C5)C(P(C6=CC=CC=C6)C7=CC=CC=C7)=CC=C2	11	NaOMe	CH3CN	25	4	30
CO130	Table 1	1	COC1=CC2=CC=CC=C2C=C1	CC([Si](C#C[Mg]Br)(C(C)C)C(C)C)C	CC([Si](C#CC1=CC2=CC=CC=C2C=C1)(C(C)C)C(C)C)C	Ni(COD)2	10	PCy3	P(C1CCCCC1)(C2CCCCC2)C3CCCCC3	20	N/A	dioxane	120	18	0
CO130	Table 1	2	COC1=CC2=CC=CC=C2C=C1	CC([Si](C#C[Mg]Br)(C(C)C)C(C)C)C	CC([Si](C#CC1=CC2=CC=CC=C2C=C1)(C(C)C)C(C)C)C	Ni(COD)2	10	IMes	CC1=C(N2C=CN(C3=C(C)C=C(C)C=C3C)[C]2)C(C)=CC(C)=C1	20	N/A	dioxane	120	18	8
CO130	Table 1	3	COC1=CC2=CC=CC=C2C=C1	CC([Si](C#C[Mg]Br)(C(C)C)C(C)C)C	CC([Si](C#CC1=CC2=CC=CC=C2C=C1)(C(C)C)C(C)C)C	Ni(COD)2	10	IPr	CC(C)C(C=CC=C1C(C)C)=C1N2[C]N(C3=C(C(C)C)C=CC=C3C(C)C)C=C2	20	N/A	dioxane	120	18	5
CO130	Table 1	4	COC1=CC2=CC=CC=C2C=C1	CC([Si](C#C[Mg]Br)(C(C)C)C(C)C)C	CC([Si](C#CC1=CC2=CC=CC=C2C=C1)(C(C)C)C(C)C)C	Ni(COD)2	10	IMe	CN1C=CN([C]1)C	20	N/A	dioxane	120	18	7
CO130	Table 1	5	COC1=CC2=CC=CC=C2C=C1	CC([Si](C#C[Mg]Br)(C(C)C)C(C)C)C	CC([Si](C#CC1=CC2=CC=CC=C2C=C1)(C(C)C)C(C)C)C	Ni(COD)2	10	IiPr	CC(C)N([C]1)C=CN1C(C)C	20	N/A	dioxane	120	18	38
CO133	Table 1	7	CC1=CC=C(OS(C2=CC=C(C)C=C2)(=O)=O)C=C1	Br[Mg]C1=CC=CC=C1	CC1=CC=C(C2=CC=CC=C2)C=C1	NiCl2(PPh3)2	5	PPh3	P(CCP(C1=CC=CC=C1)C2=CC=CC=C2)(C3=CC=CC=C3)C4=CC=CC=C4	20	N/A	Et2O	25	2	9
CO133	Table 1	8	CC1=CC=C(OS(C2=CC=C(C)C=C2)(=O)=O)C=C1	Br[Mg]C1=CC=CC=C1	CC1=CC=C(C2=CC=CC=C2)C=C1	NiCl2(dppe)	5	dppe	P(CCP(C1=CC=CC=C1)C2=CC=CC=C2)(C3=CC=CC=C3)C4=CC=CC=C4	10	N/A	Et2O	25	2	6
CO133	Table 1	9	CC1=CC=C(OS(C2=CC=C(C)C=C2)(=O)=O)C=C1	Br[Mg]C1=CC=CC=C1	CC1=CC=C(C2=CC=CC=C2)C=C1	NiCl2(dppp)	5	dppp	P(CCCP(C1=CC=CC=C1)C2=CC=CC=C2)(C3=CC=CC=C3)C4=CC=CC=C4	10	N/A	Et2O	25	2	5
CO133	Table 1	10	CC1=CC=C(OS(C2=CC=C(C)C=C2)(=O)=O)C=C1	Br[Mg]C1=CC=CC=C1	CC1=CC=C(C2=CC=CC=C2)C=C1	NiCl2(dppf)	5	dppf	C1=CC=C(C=C1)P([C-]2C=CC=C2)C3=CC=CC=C3.C1=CC=C(C=C1)P([C-]2C=CC=C2)C3=CC=CC=C3.[Fe+2]	10	N/A	Et2O	25	2	15
CO136	Table 1	3	CC(C)(C)C(OC1=CC=CC=C1OC2=CC=CC=C2)=O	N/A	C12=CC=CC=C1OC3=C2C=CC=C3	Ni(COD)2	12.5	dppp	P(CCCP(C1=CC=CC=C1)C2=CC=CC=C2)(C3=CC=CC=C3)C4=CC=CC=C4	25	Cs2CO3	xylene	160	24	0
CO136	Table 1	4	CC(C)(C)C(OC1=CC=CC=C1OC2=CC=CC=C2)=O	N/A	C12=CC=CC=C1OC3=C2C=CC=C3	Ni(COD)2	12.5	3	C1(CP(C2CCCC2)C3CCCC3)=CC=CC(CP(C4CCCC4)C5CCCC5)=C1	25	Cs2CO3	xylene	160	24	0
CO136	Table 1	5	CC(C)(C)C(OC1=CC=CC=C1OC2=CC=CC=C2)=O	N/A	C12=CC=CC=C1OC3=C2C=CC=C3	Ni(COD)2	12.5	dppb	P(CCCCP(C1=CC=CC=C1)C2=CC=CC=C2)(C3=CC=CC=C3)C4=CC=CC=C4	25	Cs2CO3	xylene	160	24	2
CO136	Table 1	6	CC(C)(C)C(OC1=CC=CC=C1OC2=CC=CC=C2)=O	N/A	C12=CC=CC=C1OC3=C2C=CC=C3	Ni(COD)2	12.5	XPhos	CC(C1=C(C2=CC=CC=C2P(C3CCCCC3)C4CCCCC4)C(C(C)C)=CC(C(C)C)=C1)C	25	Cs2CO3	xylene	160	24	0
CO136	Table 1	7	CC(C)(C)C(OC1=CC=CC=C1OC2=CC=CC=C2)=O	N/A	C12=CC=CC=C1OC3=C2C=CC=C3	Ni(COD)2	12.5	RuPhos	CCOP(=S)(OCC)SC1C(OCCO1)SP(=S)(OCC)OCC	25	Cs2CO3	xylene	160	24	0
CO136	Table 1	8	CC(C)(C)C(OC1=CC=CC=C1OC2=CC=CC=C2)=O	N/A	C12=CC=CC=C1OC3=C2C=CC=C3	Ni(COD)2	12.5	SPhos	COC1=C(C(=CC=C1)OC)C2=CC=CC=C2P(C3CCCCC3)C4CCCCC4	25	Cs2CO3	xylene	160	24	2
CO136	Table 1	12	CC(C)(C)C(OC1=CC=CC=C1OC2=CC=CC=C2)=O	N/A	C12=CC=CC=C1OC3=C2C=CC=C3	Ni(COD)2	12.5	dcype	P(CCP(C1CCCCC1)C2CCCCC2)(C3CCCCC3)C4CCCCC8	25	KOAc	xylene	160	24	18
CO136	Table 1	13	CC(C)(C)C(OC1=CC=CC=C1OC2=CC=CC=C2)=O	N/A	C12=CC=CC=C1OC3=C2C=CC=C3	Ni(COD)2	12.5	dcype	P(CCP(C1CCCCC1)C2CCCCC2)(C3CCCCC3)C4CCCCC8	25	Cs2CO3	xylene	160	24	5
CO136	Table 1	14	CC(C)(C)C(OC1=CC=CC=C1OC2=CC=CC=C2)=O	N/A	C12=CC=CC=C1OC3=C2C=CC=C3	Ni(COD)2	12.5	dcype	P(CCP(C1CCCCC1)C2CCCCC2)(C3CCCCC3)C4CCCCC8	25	N/A	xylene	160	24	0
CO136	Table 1	15	CC(C)(C)C(OC1=CC=CC=C1OC2=CC=CC=C2)=O	N/A	C12=CC=CC=C1OC3=C2C=CC=C3	Ni(COD)2	12.5	dcype	P(CCP(C1CCCCC1)C2CCCCC2)(C3CCCCC3)C4CCCCC8	25	Cs2CO3	xylene	160	24	0
CO136	Table 1	16	CC(C)(C)C(OC1=CC=CC=C1OC2=CC=CC=C2)=O	N/A	C12=CC=CC=C1OC3=C2C=CC=C3	Ni(COD)2	12.5	N/A	N/A	0	Cs2CO3	xylene	160	24	0

## Sheet: Electrophile Information
General Information		Neutral Species Data								Cation Data		Anion Data		Parameters
Molecule SMILES	LVG Type	B(1,2)	B(1,3)	B(1,4)	Q(C0)	Q(O0)	HOMO	LUMO	E(M-L)	Q(C+)	Q(O+)	Q(C–)	Q(O–)	ΔfA(C)	ΔfA(O)	BDE
ClC1=C(C=CC=C2)C2=C(OS(C3=CC=C(C)C=C3)(=O)=O)C=C1	OSO2R	0.916	1.504	1.234	0.312	-0.719	-0.23068	-0.06885	-1739.45	0.43	-0.697	0.245	-0.73	-0.051	-0.011	N/A
CC1=CC(OS(C2=CC=C(C)C=C2)(=O)=O)=CC=C1	OSO2R	0.905	1.407	1.391	0.289	-0.717	-0.25234	-0.05707	-1165.54	0.36	-0.705	0.263	-0.737	-0.045	0.008	N/A
ClC1=CC=C(OS(=O)(N(C)C)=O)C=C1	OSO2R	0.914	1.394	1.394	0.278	-0.732	-0.2583	-0.03802	-1449.48	0.398	-0.699	0.154	-0.731	0.004	-0.034	N/A
O=S(OC1=CC=CC2=C1C=CC=C2)(N(C)C)=O	OSO2R	0.907	1.509	1.238	0.311	-0.736	-0.22809	-0.0566	-1143.48	0.422	-0.714	0.175	-0.734	0.025	-0.024	N/A
O=C(C1=CC=C(OS(=O)(C(F)(F)F)=O)C=C1)OC	OSO2R	0.888	1.398	1.393	0.292	-0.71	-0.28597	-0.0765	-1420.8	0.462	-0.67	0.15	-0.718	-0.028	-0.032	N/A
O=C(C1=CC=C(OS(C)(=O)=O)C=C1)OC	OSO2R	0.911	1.393	1.388	0.303	-0.724	-0.27178	-0.06526	-1123.11	0.459	-0.666	0.162	-0.735	-0.015	-0.047	N/A
ClC1=CC=C(OS(=O)(C(F)(F)F)=O)C=C1	OSO2R	0.888	1.399	1.399	0.265	-0.709	-0.27462	-0.05478	-1652.58	0.433	-0.68	0.257	-0.71	-0.16	-0.028	N/A
CCCCOS(C1=CC=C(C)C=C1)(=O)=O	OSO2R	0.858	1.021	0.927	-0.029	-0.731	-0.27391	-0.05212	-1052.43	-0.047	-0.649	-0.066	-0.756	0.055	-0.057	N/A
O=C1OC2=CC=CC=C2C(OS(C3=CC=C(C)C=C3)(=O)=O)=C1	OSO2R	0.969	1.633	1.106	0.384	-0.702	-0.25199	-0.08338	-1391	0.398	-0.683	0.313	-0.723	0.057	0.002	N/A
CS(OC1=CC=CC2=C1C=CC=C2)(=O)=O	OSO2R	0.902	1.511	1.239	0.308	-0.728	-0.23075	-0.05887	-1048.86	0.427	-0.71	0.182	-0.731	0.007	-0.015	N/A
N#CC1=CC=C(OS(C2=CC=C(C)C=C2)(=O)=O)C=C1	OSO2R	0.927	1.387	1.385	0.305	-0.714	-0.27408	-0.07525	-1218.49	0.398	-0.694	0.232	-0.731	-0.02	-0.003	N/A
COC1=CC=C(OS(C2=CC=C(C)C=C2)(=O)=O)C=C1	OSO2R	0.904	1.411	1.37	0.249	-0.715	-0.22946	-0.05574	-1240.74	0.4	-0.696	0.235	-0.735	-0.137	0.001	N/A
CCCCOS(=O)(C(F)(F)F)=O	OSO2R	0.83	1.024	0.93	-0.023	-0.728	-0.33865	0.00281	-1119.16	-0.036	-0.571	-0.268	-0.738	0.258	-0.147	N/A
O=S(OCC1=CC=CC=C1)(C(F)(F)F)=O	OSO2R	0.81	1.022	0.931	-0.043	-0.727	-0.27771	-0.04845	-1232.27	-0.097	-0.718	-0.107	-0.764	0.118	0.028	N/A
C=CCOS(=O)(C(F)(F)F)=O	OSO2R	0.819	1.039	0.931	-0.068	-0.726	-0.30194	-0.03904	-1078.65	-0.134	-0.683	-0.129	-0.773	0.127	0.004	N/A
COC1=CC=C(OS(C)(=O)=O)C=C1	OSO2R	0.899	1.412	1.371	0.247	-0.723	-0.23387	-0.02372	-1009.75	0.414	-0.699	0.218	-0.735	-0.138	-0.012	N/A
COC1=CC=C(OS(=O)(C(F)(F)F)=O)C=C1	OSO2R	0.878	1.414	1.373	0.238	-0.709	-0.24594	-0.03556	-1307.47	0.408	-0.689	0.176	-0.726	-0.108	-0.003	N/A
CC1=CC=C(S(OC2=CC=CC3=CC=CC=C32)(=O)=O)C=C1	OSO2R	0.915	1.505	1.235	0.315	-0.718	-0.22815	-0.06328	-1279.85	0.429	-0.707	0.259	-0.735	-0.058	0.006	N/A
O=S(OC1=CC=CC2=CC=CC=C21)(C(F)(F)F)=O	OSO2R	0.879	1.515	1.242	0.304	-0.715	-0.24178	-0.07013	-1346.58	0.422	-0.707	0.174	-0.718	0.012	-0.005	N/A
CS(OC1=CC=C(C#N)C=C1)(=O)=O	OSO2R	0.918	1.389	1.389	0.299	-0.723	-0.2809	-0.07496	-987.503	0.456	-0.679	0.146	-0.734	-0.004	-0.033	N/A
CC1=CC=C(OS(C2=CC=C(C)C=C2)(=O)=O)C=C1	OSO2R	0.905	1.395	1.395	0.271	-0.716	-0.24854	-0.05678	-1165.54	0.411	-0.699	0.246	-0.735	-0.115	0.002	N/A
O=S(OC1=CC2=CC=CC=C2C=C1)(C(F)(F)F)=O	OSO2R	0.88	1.513	1.283	0.274	-0.711	-0.24325	-0.06898	-1346.58	0.326	-0.698	0.203	-0.717	0.019	-0.007	N/A
O=S(OC1=CC=C(C2=CC=CC=C2)C=C1)(C(F)(F)F)=O	OSO2R	0.86	1.393	1.392	0.276	-0.706	-0.24924	-0.05976	-1423.97	0.386	-0.693	0.162	-0.72	0.004	0.001	N/A
O=S(OC1=CC(OC)=CC=C1)(C(F)(F)F)=O	OSO2R	0.878	1.419	1.387	0.29	-0.711	-0.24711	-0.04171	-1307.47	0.335	-0.697	0.17	-0.738	0.075	0.013	N/A
O=S(OC1=CC=CC=C1)(N(CC)CC)=O	OSO2R	0.908	1.398	1.397	0.283	-0.734	-0.25816	-0.0245	-1068.46	0.392	-0.7	0.259	-0.728	-0.085	-0.04	N/A
CC1=NC2=CC=CC=C2C(OS(C3=CC=C(C)C=C3)(=O)=O)=C1	OSO2R	0.929	1.521	1.219	0.365	-0.714	-0.23815	-0.06851	-1335.2	0.434	-0.69	0.297	-0.729	-0.001	-0.009	N/A
CN1C2=CC=CC=C2C(OS(C3=CC=C(C)C=C3)(=O)=O)=CC1=O	OSO2R	0.944	1.636	1.127	0.359	-0.709	-0.23351	-0.07386	-1410.42	0.369	-0.704	0.3	-0.73	0.049	0.016	N/A
O=S(OC1=CC=CC=C1)(C(F)(F)F)=O	OSO2R	0.88	1.404	1.403	0.269	-0.711	-0.2795	-0.04343	-1192.98	0.234	-0.696	0.258	-0.717	0.046	-0.009	N/A
CC1=CC=C(S(OC2=CC=C3C(C=CC=C3)=C2)(=O)=O)C=C1	OSO2R	0.908	1.507	1.278	0.283	-0.716	-0.22906	-0.06034	-1279.85	0.338	-0.703	0.25	-0.731	-0.022	0.002	N/A
N#CC1=CC=C(OS(=O)(C(F)(F)F)=O)C=C1	OSO2R	0.897	1.394	1.393	0.29	-0.709	-0.29364	-0.08684	-1285.22	0.453	-0.673	0.138	-0.717	-0.011	-0.028	N/A
FC(C1=CC=C(OS(=O)(C(F)(F)F)=O)C=C1)(F)F	OSO2R	0.891	1.4	1.399	0.285	-0.71	-0.29822	-0.06806	-1530.01	0.472	-0.665	0.132	-0.723	-0.034	-0.032	N/A
CC1=CC=C(OS(=O)(F)=O)C=C1	OSO2R	0.872	1.401	1.401	0.255	-0.691	-0.27193	-0.04377	-994.504	0.446	-0.663	0.245	-0.694	-0.181	-0.025	N/A
FC(C1=CC=CC(OS(=O)(C(F)(F)F)=O)=C1)(F)F	OSO2R	0.891	1.402	1.401	0.279	-0.709	-0.29621	-0.0654	-1530.01	0.467	-0.662	0.174	-0.724	-0.083	-0.032	N/A
O=S(OC1=CC2=CC=CC=C2C=C1)(N(C)C)=O	OSO2R	0.907	1.507	1.279	0.286	-0.733	-0.231	-0.05632	-1143.48	0.344	-0.713	0.208	-0.731	0.02	-0.022	N/A
O=S(OC1=CC2=CC=CC=C2C=C1)(C)=O	OSO2R	0.902	1.51	1.28	0.281	-0.725	-0.23295	-0.05846	-1048.87	0.34	-0.709	0.213	-0.734	0.009	-0.007	N/A
CS(OC1=CC=CC=C1)(=O)=O	OSO2R	0.901	1.4	1.4	0.277	-0.725	-0.26504	-0.02934	-895.259	0.466	-0.678	0.184	-0.738	-0.096	-0.034	N/A
CC1=CC=C(S(OC2=CC=CC=C2)(=O)=O)C=C1	OSO2R	0.906	1.398	1.398	0.28	-0.717	-0.25958	-0.05835	-1126.25	0.41	-0.685	0.248	-0.737	-0.098	-0.012	N/A
O=S(OC1=CC=CC=C1)(N(C)C)=O	OSO2R	0.905	1.399	1.399	0.282	-0.734	-0.26055	-0.02615	-989.876	0.408	-0.698	0.271	-0.729	-0.115	-0.041	N/A
O=S(OC1=CC=C(C(OCC)=O)C=C1)(C(F)(F)F)=O	OSO2R	0.888	1.398	1.393	0.292	-0.71	-0.28487	-0.07528	-1460.12	0.456	-0.673	0.15	-0.718	-0.022	-0.029	N/A
CS(OC1=CC=C(C(OCC)=O)C=C1)(=O)=O	OSO2R	0.911	1.393	1.388	0.302	-0.724	-0.27087	-0.06415	-1162.4	0.457	-0.669	0.162	-0.735	-0.015	-0.044	N/A
CS(OC1=CC=C(C(F)(F)F)C=C1)(=O)=O	OSO2R	0.913	1.395	1.395	0.293	-0.724	-0.28414	-0.05532	-1232.3	0.469	-0.668	0.161	-0.735	-0.044	-0.045	N/A
CC1=CC=C(OS(=O)(C(F)(F)F)=O)C=C1	OSO2R	0.887	1.402	1.401	0.251	-0.729	-0.25512	-0.02485	-1232.27	0.45	-0.681	0.251	-0.711	-0.199	-0.066	N/A
CS(OC1=CC=CC(OC)=C1)(=O)=O	OSO2R	0.9	1.413	1.384	0.305	-0.724	-0.23552	-0.02755	-1009.75	0.35	-0.706	0.225	-0.74	0.035	-0.002	N/A
O=S(OC1=C(OC)C=CC=C1)(C(F)(F)F)=O	OSO2R	0.896	1.429	1.303	0.242	-0.703	-0.2477	-0.04296	-1307.47	0.35	-0.688	0.132	-0.731	0.002	0.013	N/A
CC1=CC=CC(OS(=O)(C(F)(F)F)=O)=C1	OSO2R	0.877	1.41	1.399	0.28	-0.711	-0.26933	-0.04041	-1232.27	0.366	-0.689	0.151	-0.735	0.043	0.002	N/A
O=S(OC1=CC2=CC=CC=C2C=C1)(N(CC)CC)=O	OSO2R	0.911	1.506	1.278	0.287	-0.732	-0.22935	-0.05476	-1222.06	0.341	-0.712	0.212	-0.73	0.021	-0.022	N/A
CC1=CC=C(S(OC2=CC(NC(OC(C)(C)C)=O)=CC=C2)(=O)=O)C=C1	OSO2R	0.909	1.415	1.384	0.3	-0.715	-0.23074	-0.05951	-1527.32	0.313	-0.704	0.269	-0.735	0.018	0.009	N/A
O=S(OC1=CC=C(C=C1)C(C)(C)C)(C(F)(F)F)=O	OSO2R	0.878	1.411	1.388	0.263	-0.71	-0.26578	-0.03852	-1350.13	0.441	-0.685	0.126	-0.728	-0.041	-0.007	N/A
O=S(OC1=CC=C(C([2H])([2H])[2H])C=C1)(C(F)(F)F)=O	OSO2R	0.887	1.402	1.401	0.251	-0.729	-0.25512	-0.02485	-1232.27	0.45	-0.681	0.251	-0.711	-0.199	-0.066	N/A
O=S(OC1=CC=C(OC(C)(C)C)C=C1)(C(F)(F)F)=O	OSO2R	0.876	1.411	1.373	0.236	-0.709	-0.23962	-0.0314	-1425.35	0.398	-0.692	0.166	-0.726	-0.092	0	N/A
O=S(OC1=CC2=C(CCCC2)C=C1)(C(F)(F)F)=O	OSO2R	0.875	1.406	1.395	0.271	-0.711	-0.25964	-0.03487	-1348.95	0.421	-0.689	0.164	-0.726	-0.043	-0.007	N/A
O=S(OC1=CC=C(CC)C=C1)(C(F)(F)F)=O	OSO2R	0.878	1.4	1.4	0.262	-0.71	-0.26689	-0.03927	-1271.56	0.446	-0.683	0.253	-0.71	-0.175	-0.027	N/A
O=S(OC1=CC(OC)=CC(OC)=C1)(C(F)(F)F)=O	OSO2R	0.879	1.448	1.363	0.314	-0.709	-0.23881	-0.03388	-1421.97	0.277	-0.701	0.185	-0.739	0.166	0.022	N/A
O=S(OC1=CC=C(C(C)=O)C=C1)(C(F)(F)F)=O	OSO2R	0.89	1.402	1.386	0.294	-0.71	-0.27083	-0.08549	-1345.59	0.395	-0.683	0.156	-0.716	0.037	-0.021	N/A
CC1=CC=C(OS(=O)(OC2=CC=C(C)C=C2)=O)C=C1	OSO2R	0.888	1.399	1.399	0.264	-0.692	-0.25679	-0.0364	-1240.75	0.344	-0.673	0.19	-0.709	-0.006	-0.002	N/A
COC1=CC2=CC=CC=C2C=C1	OR	1.005	1.483	1.239	0.332	-0.517	-0.21581	-0.04346	-500.286	0.398	-0.432	0.296	-0.56	-0.03	-0.042	67.4359
CC1=CC=C(C2CO2)C=C1	OR	0.91	1.021	0.977	0.078	-0.523	-0.24001	-0.01715	-424.048	0.032	-0.455	0.034	-0.574	0.09	-0.017	26.9722
OC1=CC2=CC=CC=C2C=C1	OR	1.018	1.48	1.247	0.341	-0.666	-0.2175	-0.04669	-461.007	0.388	-0.572	0.292	-0.704	0.002	-0.056	82.183
CN1C(C(OC)=O)=CC2=C1C=CC=C2	OR	1.022	1.673	1.056	0.782	-0.535	-0.21864	-0.05798	-630.865	0.752	-0.52	0.653	-0.579	0.159	0.029	81.257
CN1C(C(OCC)=O)=CC2=C1C=CC=C2	OR	1.024	1.671	1.054	0.787	-0.552	-0.21787	-0.05693	-670.161	0.754	-0.533	0.656	-0.592	0.164	0.021	80.437
CN1C(C(OC(C)(C)C)=O)=CC2=C1C=CC=C2	OR	1.037	1.66	1.047	0.789	-0.58	-0.21598	-0.05411	-748.914	0.762	-0.559	0.66	-0.609	0.156	0.008	81.783
O=C(CO)C1=CC=CC=C1	OR	0.941	0.974	0.928	-0.107	-0.72	-0.25487	-0.07338	-460.004	-0.114	-0.591	-0.119	-0.759	0.019	-0.09	80.598
CCOC1N(C(OCC)=O)C2=CC=CC=C2C=C1	OR	0.902	1.016	0.921	0.288	-0.585	-0.22519	-0.04703	-823.936	0.245	-0.539	0.267	-0.621	0.064	-0.01	11.8424
COC1=CC=CC2=CC=CC=C21	OR	1.003	1.483	1.204	0.356	-0.524	-0.20986	-0.04001	-500.285	0.443	-0.449	0.243	-0.56	0.026	-0.039	66.9735
CCOC1OC2=CC=CC=C2C=C1	OR	0.93	1.014	0.91	0.412	-0.581	-0.22397	-0.04256	-576.671	0.368	-0.558	0.388	-0.603	0.068	-0.001	20.2918
COC1=CC2=C(C=C1)CCCC2	OR	0.996	1.379	1.354	0.329	-0.522	-0.2143	-0.0058	-502.655	0.415	-0.39	0.321	-0.556	-0.078	-0.098	67.6844
C12=CC=CC=C1C=C(C(OCC3=CC=CC=N3)C4=CC=CC=C4)C=C2	OR	0.895	0.986	0.982	0.117	-0.594	-0.22259	-0.04714	-1017.59	0.095	-0.599	0.115	-0.598	0.024	0.009	17.6525
CN(CCOC(C1=CC=CC=C1)C2=CC3=CC=CC=C3C=C2)C	OR	0.896	0.987	0.986	0.113	-0.594	-0.21916	-0.04523	-943.745	0.21	-0.611	0.224	-0.622	-0.208	0.045	14.5689
CCOC1=CC2=CC=CC=C2C=C1	OR	1	1.453	1.27	0.333	-0.539	-0.21007	-0.04592	-539.58	0.394	-0.443	0.296	-0.572	-0.024	-0.063	58.1657
CCCCOC1=CC2=CC=CC=C2C=C1	OR	1.005	1.481	1.239	0.337	-0.533	-0.21432	-0.04232	-618.162	0.399	-0.436	0.296	-0.57	-0.021	-0.06	57.1479
CC(COC1=CC2=CC=CC=C2C=C1)C	OR	1.003	1.481	1.239	0.338	-0.543	-0.21487	-0.04291	-618.163	0.4	-0.44	0.3	-0.577	-0.024	-0.069	64.3982
CC(OC1=CC2=CC=CC=C2C=C1)(C)C	OR	0.956	1.498	1.266	0.315	-0.605	-0.22074	-0.04733	-618.162	0.397	-0.564	0.252	-0.619	-0.019	-0.027	60.8697
COCOC1=CC2=CC=CC=C2C=C1	OR	0.994	1.456	1.272	0.325	-0.519	-0.21342	-0.04881	-614.775	0.386	-0.433	0.288	-0.552	-0.024	-0.053	50.438
C[Si](OC1=CC2=CC=CC=C2C=C1)(C)C	OR	0.993	1.48	1.247	0.352	-0.849	-0.21441	-0.04348	-869.645	0.413	-0.74	0.298	-0.868	-0.007	-0.09	75.0125
CC[C@@H](OCC1=CC=CC=C1)C2=CC3=CC=CC=C3C=C2	OR	0.89	0.992	0.986	0.135	-0.593	-0.22216	-0.04856	-849.137	0.111	-0.596	0.115	-0.602	0.044	0.012	16.122
OCC1=CC2=CC=CC=C2C=C1	OR	0.932	1.012	0.931	-0.028	-0.725	-0.22228	-0.04645	-500.286	-0.068	-0.711	-0.145	-0.76	0.157	0.021	47.943
COCC1=CC2=CC=CC=C2C=C1	OR	0.918	1.012	0.929	-0.04	-0.562	-0.22304	-0.04688	-539.569	-0.063	-0.563	-0.032	-0.586	0.015	0.025	35.6187
C/C(OC)=C\CC1CCCCC1	OR	0.946	1.826	1.033	0.327	-0.557	-0.21915	0.02608	-506.199	0.457	-0.42	0.319	-0.587	-0.122	-0.107	63.9627
CC([Si](C(C)C)(C(C)C)OC1=CC2=CC=CC=C2C=C1)C	OR	0.977	1.478	1.26	0.341	-0.881	-0.21519	-0.04645	-1105.35	0.398	-0.785	0.302	-0.898	-0.018	-0.079	69.6052
C[Si](C)(C(C)(C)C)OC1=CC2=CC=CC=C2C=C1	OR	0.975	1.482	1.26	0.34	-0.865	-0.21595	-0.04596	-987.502	0.4	-0.779	0.301	-0.88	-0.021	-0.071	69.9541
C[Si](C)(C1=CC=CC=C1)OC2=CC3=CC=CC=C3C=C2	OR	0.976	1.478	1.263	0.34	-0.857	-0.21416	-0.04502	-1061.33	0.404	-0.768	0.316	-0.875	-0.04	-0.071	70.0301
C[Si](C)(C=C)OC1=CC2=CC=CC=C2C=C1	OR	0.982	1.485	1.252	0.344	-0.853	-0.21576	-0.04462	-907.714	0.409	-0.76	0.306	-0.87	-0.027	-0.076	72.899
COC1C=CCCC1	OR	0.89	1.009	0.999	0.109	-0.574	-0.24724	0.01036	-349.034	0.066	-0.37	0.057	-0.611	0.095	-0.167	35.6375
C1(OC2=CC=CC=C2)C=CCCC1	OR	0.864	1.012	0.996	0.105	-0.547	-0.22257	-0.00963	-540.854	0.072	-0.388	0.066	-0.558	0.072	-0.148	87.3845
OC1C=CCCC1	OR	0.91	1.009	0.998	0.119	-0.732	-0.25262	0.00856	-309.753	0.037	-0.662	-0.149	-0.769	0.35	-0.033	49.4716
CC(C1=CC=C(OC)C=C1)(C)C	OR	0.998	1.393	1.338	0.322	-0.521	-0.21919	-0.00916	-503.841	0.411	-0.38	0.311	-0.554	-0.078	-0.108	67.7434
COC(C1=CC=CC=C1)C2=CC=CC=C2	OR	0.905	0.983	0.981	0.111	-0.577	-0.2445	-0.02011	-616.95	0.077	-0.581	0.061	-0.6	0.084	0.027	28.3195
COCOC(C1=CC=CC=C1)C2=CC=CC=C2	OR	0.878	0.989	0.987	0.098	-0.579	-0.24503	-0.02129	-731.447	0.079	-0.571	0.088	-0.589	0.029	0.002	16.1722
COCCOCOC(C1=CC=CC=C1)C2=CC=CC=C2	OR	0.897	0.983	0.983	0.11	-0.577	-0.2469	-0.02116	-885.434	0.082	-0.577	0.09	-0.59	0.048	0.013	139.379
COCCOC(C1=CC=CC=C1)C2=CC=CC=C2	OR	0.898	0.983	0.982	0.116	-0.594	-0.24611	-0.02113	-770.73	0.084	-0.591	0.055	-0.607	0.093	0.01	21.853
COC1=CC(C2=CC=CC=C2)=CC(C3=CC=CC=C3)=C1	OR	1.003	1.384	1.35	0.343	-0.519	-0.22502	-0.04387	-808.66	0.402	-0.433	0.334	-0.552	-0.05	-0.053	59.9692
CC(C=C1)=CC=C1C2=CC(C3=CC=CC=C3)=CC(OC)=C2	OR	1.002	1.385	1.35	0.342	-0.519	-0.22142	-0.04207	-847.957	0.391	-0.446	0.333	-0.53	-0.04	-0.062	59.5318
COC1=CC(C2=C(C=CC=C3)C3=CC=C2)=CC(C4=CC=CC=C4)=C1	OR	1.003	1.382	1.35	0.341	-0.519	-0.2197	-0.0535	-962.192	0.329	-0.509	0.326	-0.551	0.027	0.022	14.5701
COC1=CC(C2=CC=CC=C2)=CC(C3=CC=C(C(C)(C)C)C=C3)=C1	OR	1.002	1.384	1.351	0.342	-0.519	-0.2233	-0.04213	-965.821	0.394	-0.452	0.333	-0.553	-0.043	-0.033	57.99
CC(C=C1)=CC=C1C2=CC(C3=CC=C(C(C)(C)C)C=C3)=CC(OC)=C2	OR	1.001	1.385	1.351	0.342	-0.52	-0.21999	-0.0403	-1005.12	0.39	-0.458	0.333	-0.553	-0.039	-0.029	57.6813
CC[C@@H](OC1OCCCC1)C2=CC3=CC=CC=C3C=C2	OR	0.877	0.991	0.99	0.12	-0.595	-0.2228	-0.05014	-849.342	0.09	-0.582	0.104	-0.606	0.046	-0.002	28.3433
CC[C@@H](OCCOC)C1=CC2=CC=CC=C2C=C1	OR	0.895	0.989	0.988	0.13	-0.602	-0.2231	-0.0488	-771.936	0.102	-0.595	0.102	-0.595	0.056	-0.014	29.6574
CC[C@@H](OCC1=CC=CC=N1)C2=CC3=CC=CC=C3C=C2	OR	0.889	0.992	0.986	0.136	-0.601	-0.22337	-0.04964	-865.187	-0.068	-0.582	0.11	-0.582	0.23	-0.038	25.2391
CC[C@@H](OCC(O)=O)C1=CC2=CC=CC=C2C=C1	OR	0.863	0.994	0.991	0.138	-0.622	-0.23436	-0.06126	-806.71	0.113	-0.629	0.113	-0.62	0.05	0.005	17.8275
OC/C=C/C1=CC=CC=C1	OR	0.915	1.031	0.931	-0.067	-0.726	-0.23648	-0.0471	-424.054	-0.121	-0.673	-0.121	-0.673	0.108	-0.106	43.9414
OC(C=C)C1=CC=CC=C1	OR	0.919	1.007	0.987	0.097	-0.721	-0.25246	-0.01849	-424.05	0.025	-0.668	0.025	-0.668	0.144	-0.106	37.6179
C=CCO	OR	0.93	1.032	0.931	-0.051	-0.723	-0.26389	-0.0005	-193.063	-0.139	-0.512	-0.139	-0.512	0.176	-0.422	50.7404
O=C(C1=CC=CC=C1)N(CC2=CC=CC=C2)C(C(C)(C)C)OC	OR	0.901	0.955	0.935	0.315	-0.593	-0.24449	-0.04294	-982.06	0.316	-0.563	0.316	-0.563	-0.002	-0.06	33.2235
COC/C=C/C1=CC=CC=C1	OR	0.928	0.98	0.913	0.314	-0.571	-0.23545	-0.04463	-463.334	-0.113	-0.525	-0.113	-0.525	0.854	-0.092	30.0477
COC1=CC=CC=C1	OR	1.001	1.35	1.384	0.326	-0.52	-0.22672	-0.01126	-346.681	0.41	-0.351	0.41	-0.351	-0.168	-0.338	69.3116
C1(OC2=CC(OC3=CC=CC=C3)=CC(OC4=CC=CC=C4)=C2)=CC=CC=C1	OR	0.962	1.388	1.361	0.349	-0.522	-0.2267	-0.02557	-1150.77	0.372	-0.452	0.33	-0.491	-0.004	-0.101	31.4213
CCOC/C=C/C1=CC=CC=C1	OR	0.902	1.025	0.929	-0.072	-0.587	-0.2349	-0.04404	-502.63	-0.113	-0.532	-0.113	-0.532	0.082	-0.11	21.9321
C[Si](OC/C=C/C1=CC=CC=C1)(C)C	OR	0.891	1.027	0.929	-0.06	-0.9	-0.2341	-0.03939	-832.692	-0.1	-0.835	-0.1	-0.835	0.08	-0.13	37.3707
COC1=CC=C(C2=CC=CC=C2)C=C1	OR	1.004	1.376	1.342	0.328	-0.518	-0.21604	-0.03118	-577.671	0.403	-0.424	0.403	-0.424	-0.15	-0.188	65.1926
CO/C=C/C1=CC2=CC=CC=C2C=C1	OR	1.013	1.76	0.931	0.175	-0.514	-0.20235	-0.04716	-577.661	0.282	-0.438	0.282	-0.438	-0.214	-0.152	64.604
C=C(C1=CC2=CC=CC=C2C=C1)OP(OCC)(OCC)=O	OPO(OR)2	0.9	1.845	1.054	0.313	-0.805	-0.22331	-0.06268	-1263.23	0.316	-0.785	0.277	-0.808	0.033	-0.017	N/A
O=P(N1CCOC1=O)(N2CCOC2=O)OC3=CC=CC4=CC=CC=C43	OPO(OR)2	0.906	1.508	1.235	0.339	-0.806	-0.23259	-0.06031	-1520.79	0.581	-0.802	0.19	-0.812	-0.093	0.002	N/A
O=P(OCC)(OCC)OC1=CC2=CC=CC=C2C=C1	OPO(OR)2	0.916	1.506	1.27	0.319	-0.797	-0.22755	-0.0533	-1185.86	0.384	-0.743	0.258	-0.804	-0.004	-0.047	N/A
C=C(OP(OCC)(OCC)=O)C1=CC=CC=C1	OPO(OR)2	0.898	1.842	1.052	0.326	-0.814	-0.23524	-0.0437	-1109.62	0.378	-0.766	0.245	-0.82	0.029	-0.042	N/A
FC1=CC=C(C(OP(OCC)(OCC)=O)=C)C=C1	OPO(OR)2	0.906	1.842	1.053	0.315	-0.799	-0.23843	-0.04796	-1208.87	0.354	-0.747	0.234	-0.81	0.042	-0.041	N/A
C=C(OP(OCC)(OCC)=O)C1=CC=C(C=C1)C#C[Si](C)(C)C	OPO(OR)2	0.906	1.836	1.058	0.312	-0.8	-0.22998	-0.06645	-1594.39	0.316	-0.775	0.275	-0.809	0.033	-0.016	N/A
C=C(OP(OCC)(OCC)=O)C1=CC=C(OC)N=C1	OPO(OR)2	0.903	1.839	1.058	0.313	-0.801	-0.2306	-0.04443	-1240.18	0.333	-0.762	0.23	-0.81	0.063	-0.03	N/A
O=P(OC(/C=C/CCC1=CC=CC=C1)=C\CC)(OC2=CC=CC=C2)OC3=CC=CC=C3	OPO(OR)2	0.862	1.778	1.104	0.272	-0.821	-0.2267	-0.034	-1648.96	0.297	-0.806	0.227	-0.827	0.02	-0.009	N/A
O=P(OC1=CCCC=C1)(OC2=CC=CC=C2)OC3=CC=CC=C3	OPO(OR)2	0.884	1.788	1.085	0.277	-0.802	-0.22437	-0.04055	-1338.21	0.321	-0.779	0.23	-0.81	0.003	-0.015	N/A
O=P(OC(/C=C/CCC1=CC=CC=C1)=C/CC)(OC2=CC=CC=C2)OC3=CC=CC=C3	OPO(OR)2	0.858	1.836	1.049	0.28	-0.817	-0.24245	-0.02555	-1648.96	0.287	-0.804	0.258	-0.826	0.015	-0.004	N/A
O=C1OC2=CC=CC=C2C(OP(OCC)(OCC)=O)=C1	OPO(OR)2	0.956	1.638	1.111	0.397	-0.787	-0.24654	-0.07367	-1297.01	0.41	-0.752	0.261	-0.8	0.123	-0.022	N/A
O=P(OCC)(OCC)OC1=CC=C2C(C=CC=C2)=C1	OPO(OR)2	0.916	1.506	1.27	0.319	-0.797	-0.22755	-0.0533	-1185.86	0.384	-0.743	0.258	-0.804	-0.004	-0.047	N/A
O=P(OC/C=C/C1=CC=CC=C1)(OCC)OCC	OPO(OR)2	0.834	1.038	0.927	-0.07	-0.837	-0.23729	-0.04626	-1148.91	-0.113	-0.824	-0.114	-0.854	0.087	0.004	N/A
CC(C)(C)C(OC1=CC=CC2=CC=CC=C21)=O	OCOR	0.925	1.504	1.229	0.326	-0.562	-0.2289	-0.05876	-731.486	0.438	-0.527	0.18	-0.568	0.034	-0.029	41.0705
CC(C)(C)C(OC1=CC2=C(C=CC=C2)C3=CC=CC=C31)=O	OCOR	0.924	1.587	1.156	0.328	-0.562	-0.22742	-0.05886	-885.092	0.356	-0.535	0.314	-0.592	-0.014	0.003	38.4149
COC1=CC=C(C=CC(OC(C(C)(C)C)=O)=C2)C2=C1	OCOR	0.904	1.521	1.267	0.316	-0.563	-0.21421	-0.04959	-846	0.327	-0.546	0.237	-0.563	0.068	-0.017	49.0712
CC(C)(C)C(OC1=CC2=CC=C([Si](C)(C)C)C=C2C=C1)=O	OCOR	0.889	1.465	1.328	0.317	-0.577	-0.22202	-0.05921	-1140.1	0.369	-0.552	0.249	-0.576	0.016	-0.026	50.6827
CC(C)(C)C(OC1=CC2=CC=CC=C2C=C1C(OC)=O)=O	OCOR	0.912	1.508	1.241	0.32	-0.577	-0.23654	-0.06614	-959.33	0.479	-0.576	0.414	-0.599	-0.253	0.021	43.4939
O=C(C1=CC=C(OC(C(C)(C)C)=O)C=C1)OC	OCOR	0.921	1.385	1.382	0.329	-0.561	-0.25968	-0.05784	-805.748	0.455	-0.471	0.192	-0.563	0.011	-0.088	62.146
CC(C)(C(OC1=CC=CC=C1C(OC)=O)=O)C	OCOR	0.92	1.406	1.347	0.338	-0.553	-0.26285	-0.05114	-805.728	0.449	-0.486	0.261	-0.557	-0.034	-0.063	46.5681
CC(C)(C(OC1=CC(C=CC(N2C=CC=N2)=C3)=C3C=C1)=O)C	OCOR	0.907	1.506	1.276	0.31	-0.562	-0.22379	-0.06023	-956.468	0.39	-0.535	0.235	-0.561	-0.005	-0.028	48.3345
CC(C)(C(OC1=CC(C=CN2C(C(C)(C)C)=O)=C2C=C1)=O)C	OCOR	0.899	1.445	1.353	0.303	-0.566	-0.22985	-0.04748	-979.932	0.309	-0.544	0.259	-0.566	0.038	-0.022	54.208
CC(C)(C)C(OC1=CC=CC2=CC=CN=C21)=O	OCOR	0.903	1.499	1.251	0.307	-0.581	-0.24295	-0.07134	-747.55	0.382	-0.516	0.188	-0.596	0.044	-0.05	52.8168
CC1=NC2=CC=CC=C2C(OC(C(C)(C)C)=O)=C1	OCOR	0.907	1.535	1.209	0.381	-0.577	-0.2535	-0.07037	-786.852	0.488	-0.557	0.213	-0.574	0.061	-0.023	50.8735
CC(C)(C)C(OC1=CC2=CC=CC=C2C=C1)=O	OCOR	0.889	1.466	1.328	0.317	-0.577	-0.22324	-0.05837	-731.506	0.364	-0.549	0.258	-0.58	0.012	-0.025	53.6044
O=C(OC1=CC2=CC=CC=C2C=C1)N(CC)CC	OCOR	0.915	1.508	1.272	0.319	-0.572	-0.22171	-0.04742	-786.85	0.36	-0.531	0.261	-0.572	0.017	-0.041	56.4608
CC(OC(OC1=CC2=CC=CC=C2C=C1)=O)(C)C	OCOR	0.898	1.515	1.275	0.313	-0.579	-0.22945	-0.05393	-806.725	0.37	-0.544	0.247	-0.583	0.009	-0.031	53.802
O=C(N(CC)CC)OC1=C2C(C=CC=C2)=CC3=CC=CC=C31	OCOR	0.938	1.323	1.316	0.358	-0.574	-0.20396	-0.0779	-940.429	0.583	-0.565	0.348	-0.602	-0.215	0.019	42.8062
O=C(C(C)C)OC1=C2C(C=CC=C2)=CC3=CC=CC=C31	OCOR	0.917	1.327	1.327	0.342	-0.552	-0.21169	-0.0845	-845.804	0.572	-0.57	0.206	-0.548	-0.094	0.014	47.2992
O=C(CC)OC1=C2C(C=CC=C2)=CC3=CC=CC=C31	OCOR	0.917	1.328	1.328	0.342	-0.554	-0.21222	-0.08481	-806.515	0.458	-0.543	0.208	-0.553	0.018	-0.012	53.7198
CC(C)(C)C(OC1=C2C(C=CC=C2)=CC3=CC=CC=C31)=O	OCOR	0.929	1.324	1.318	0.352	-0.567	-0.20752	-0.08133	-885.082	0.428	-0.548	0.218	-0.569	0.058	-0.017	37.4554
CC(OC1=C2C(C=CC=C2)=CC3=CC=CC=C31)=O	OCOR	0.916	1.329	1.329	0.341	-0.555	-0.21303	-0.08549	-767.224	0.457	-0.543	0.209	-0.554	0.016	-0.013	53.8435
O=C(C1=CC=CC=C1)OC2=C3C(C=CC=C3)=CC4=CC=CC=C42	OCOR	0.924	1.325	1.321	0.351	-0.552	-0.20825	-0.08204	-958.911	0.581	-0.56	0.349	-0.6	-0.228	0.056	45.522
O=C(C1=C(C)C=C(C)C=C1C)OC2=C3C(C=CC=C3)=CC4=CC=CC=C42	OCOR	0.917	1.328	1.323	0.349	-0.552	-0.20713	-0.08018	-1076.79	0.425	-0.545	0.209	-0.545	0.064	-0.014	30.4963
O=C(CC1=CC=CC=C1)OC2=C3C(C=CC=C3)=CC4=CC=CC=C42	OCOR	0.916	1.328	1.327	0.339	-0.553	-0.21347	-0.08626	-998.205	0.444	-0.54	0.196	-0.548	0.038	-0.018	39.2783
CCC(OC(OCC)=O)/C=C/C1=CC=CC=C1	OCOR	0.818	1.025	1.005	0.107	-0.56	-0.23654	-0.05152	-769.787	0.053	-0.533	0.084	-0.566	0.077	-0.021	22.5219
O=C(N(CC)CC)OC1=CC=CC2=C1C=CC=C2	OCOR	0.916	1.502	1.239	0.34	-0.578	-0.21903	-0.0481	-786.848	0.434	-0.536	0.219	-0.573	0.027	-0.047	55.7963
O=C(OC(C)(C)C)O[C@@H](C1=CC=CC=C1)C2=CC3=CC=CC=C3C=C2	OCOR	0.85	0.987	0.986	0.106	-0.562	-0.22437	-0.04856	-1077	0.197	-0.588	0.223	-0.564	-0.208	0.028	17.2741
O=C(C(C)(C)C)O[C@@H](C1=CC=CC=C1)C2=CC3=CC=CC=C3C=C2	OCOR	0.836	0.993	0.989	0.096	-0.576	-0.22669	-0.05209	-1001.78	0.068	-0.562	0.183	-0.591	-0.059	0.001	15.1682
O=C(C1=CC=CC=C1)O[C@@H](C2=CC=CC=C2)C3=CC4=CC=CC=C4C=C3	OCOR	0.853	0.989	0.979	0.106	-0.58	-0.23248	-0.06211	-1075.59	0.082	-0.579	0.215	-0.612	-0.085	0.031	9.83433
O=C(N1CCCC1)O[C@@H](C2=CC=CC=C2)C3=CC4=CC=CC=C4C=C3	OCOR	0.853	0.996	0.996	0.122	-0.583	-0.21805	-0.04511	-1055.92	0.09	-0.567	0.214	-0.609	-0.06	0.01	13.7952
O=C(C)OC1=CC2=CC=CC=C2C=C1	OCOR	0.916	1.508	1.276	0.296	-0.547	-0.23743	-0.06338	-613.628	0.364	-0.525	0.235	-0.55	-0.007	-0.019	56.9208
CC(C)(C)C(OC1=CC=CC=C1)=O	OCOR	0.907	1.399	1.395	0.307	-0.563	-0.25132	-0.02235	-577.901	0.448	-0.471	0.303	-0.56	-0.137	-0.095	55.4342
O=C(O[C@@](C)(CC)C1=CC2=CC=CC=C2C=C1)C	OCOR	0.827	0.998	0.98	0.31	-0.595	-0.22545	-0.04923	-770.779	0.4	-0.637	0.279	-0.576	-0.059	0.023	18.637
CC(OC(C(C)(C)C)=O)C1=CC2=CC=CC=C2C=C1	OCOR	0.83	1.012	0.999	0.117	-0.58	-0.22903	-0.05286	-810.091	0.076	-0.575	0.104	-0.567	0.054	-0.018	25.3589
O=C(O/C(OCC)=C(F)\F)C1=CC=CC=C1	OCOR	0.941	1.698	0.997	0.455	-0.548	-0.23757	-0.07029	-850.356	0.584	-0.489	0.487	-0.569	-0.161	-0.038	35.2767
O=C(OC(C=C1)=CC=C1OC)OC	OCOR	0.892	1.42	1.37	0.277	-0.572	-0.22908	-0.02178	-649.736	0.431	-0.521	0	0	0.123	-0.623	57.6794
C=C(C1=CC=CC=C1)OC(C)=O	OCOR	0.903	1.85	1.052	0.293	-0.558	-0.2487	-0.05671	-537.397	0.343	-0.534	0.202	-0.561	0.041	-0.021	45.2528
CCCCCC(OC(OCC)=O)/C=C/C1=CC=CC=C1	OCOR	0.821	1.024	0.999	0.108	-0.566	-0.23721	-0.05275	-887.659	0.059	-0.539	0.084	-0.573	0.073	-0.02	18.462
O=C(OC1C=CCCC1)C	OCOR	0.853	1.03	0.994	0.106	-0.567	-0.2638	-0.01321	-462.371	0.058	-0.511	0.087	-0.576	0.067	-0.047	22.0764
COC1=CC=C(OC(N(CC)CC)=O)C=C1	OCOR	0.908	1.418	1.366	0.285	-0.573	-0.21831	-0.01263	-747.74	0.387	-0.513	0	0	0.183	-0.633	56.1972
COC1=CC=C(OC(C(C)(C)C)=O)C=C1	OCOR	0.9	1.419	1.368	0.277	-0.563	-0.22423	-0.01763	-692.396	0.427	-0.51	0	0	0.127	-0.616	53.4268
CC(OC(OC1=CC=CC2=CC=CC=C21)=O)(C)C	OCOR	0.892	1.511	1.245	0.335	-0.587	-0.22826	-0.05575	-806.723	0.459	-0.559	0.199	-0.584	0.012	-0.031	52.793
O=C(OC1=CC=CC2=CC=CC=C21)C3=CC=CC=C3	OCOR	0.923	1.498	1.235	0.328	-0.546	-0.2283	-0.06319	-805.314	0.439	-0.514	0.272	-0.568	-0.055	-0.01	48.0973
O=C(OC1=CC(C2=CC=CC=C2)=CC(OC)=C1)N(CC)CC	OCOR	0.919	1.41	1.374	0.343	-0.569	-0.22324	-0.0356	-978.732	0.384	-0.52	0.296	-0.566	0.006	-0.052	51.9095
C[C@@H](OC(C(C)(C)C)=O)/C=C/C1=CC=CC=C1	OCOR	0.83	1.029	1.021	0.122	-0.579	-0.22922	-0.04528	-733.856	0.06	-0.544	0.072	-0.587	0.112	-0.027	15.1926
O=C(OC1=CC2=CC=CC=C2CC1)N(C)C	OCOR	0.906	1.771	1.02	0.372	-0.575	-0.21333	-0.03394	-709.438	0.494	-0.529	0.228	-0.574	0.022	-0.047	57.5025
O=C(OC1C=CCCC1)OC	OCOR	0.833	1.016	1.001	0.101	-0.555	-0.26026	0.00027	-537.603	0.364	-0.525	0.049	-0.557	-0.211	-0.028	31.9955
O=C(C(C)C)OC1=CC2=CC=CC=C2C=C1	OCOR	0.919	1.503	1.275	0.299	-0.545	-0.23548	-0.06243	-692.207	0.368	-0.519	0.237	-0.549	-0.007	-0.022	50.3212
CC[C@@H](OC(C(C)(O)C)=O)C1=CC2=CC=CC=C2C=C1	OCOR	0.838	0.995	0.989	0.124	-0.59	-0.23486	-0.05952	-885.287	0.206	-0.579	0.111	-0.551	-0.069	-0.05	11.8618
CC[C@@H](OC(CO)=O)C1=CC2=CC=CC=C2C=C1	OCOR	0.844	0.995	0.99	0.115	-0.564	-0.2267	-0.05084	-806.697	0.075	-0.578	0.096	-0.563	0.059	0.013	15.9689
CC[C@@H](OC(CSC)=O)C1=CC2=CC=CC=C2C=C1	OCOR	0.845	0.996	0.99	0.108	-0.563	-0.23405	-0.05958	-1168.97	0.084	-0.553	0.089	-0.57	0.043	-0.003	14.5306
CC[C@@H](OC(C(C)(C)S)=O)C1=CC2=CC=CC=C2C=C1	OCOR	0.828	0.998	0.994	0.119	-0.568	-0.2279	-0.05372	-1208.27	0.09	-0.567	0.112	-0.567	0.036	-0.002	27.6343
CC[C@@H](OC(CS)=O)C1=CC2=CC=CC=C2C=C1	OCOR	0.843	0.993	0.991	0.115	-0.565	-0.22813	-0.05445	-1129.68	0.084	-0.57	0.098	-0.566	0.048	0.006	21.516
CC[C@@H](OC(C)=O)C1=CC2=CC=CC=C2C=C1	OCOR	0.85	0.996	0.99	0.122	-0.565	-0.23122	-0.05512	-731.497	0.092	-0.568	0.108	-0.554	0.044	-0.008	25.1067
CC[C@@H](OC(C(C)(C)C)=O)C1=CC2=CC=CC=C2C=C1	OCOR	0.838	0.995	0.995	0.118	-0.588	-0.22522	-0.05095	-849.379	0.08	-0.578	0.078	-0.582	0.078	-0.016	23.5868
FC(C1=CC=C(OC(C(C)(C)C)=O)C=C1)(F)F	OCOR	0.922	1.39	1.388	0.323	-0.561	-0.2696	-0.04676	-914.939	0.441	-0.459	0.322	-0.561	-0.117	-0.102	40.7687
CC(C)(C)C(OC1=CC(OC)=CC=C1)=O	OCOR	0.911	1.404	1.382	0.328	-0.558	-0.2276	-0.02379	-692.398	0.373	-0.518	0.236	-0.559	0.047	-0.039	53.1752
CC(C)(C)C(OC1=CC(N(C)C)=CC=C1)=O	OCOR	0.904	1.418	1.38	0.328	-0.56	-0.19722	-0.01477	-711.808	0.328	-0.544	0.273	-0.564	0.055	-0.012	53.2272
CC(C)(C)C(OC1=CC(C(F)(F)F)=CC=C1)=O	OCOR	0.918	1.398	1.389	0.316	-0.561	-0.26839	-0.04593	-914.938	0.433	-0.461	0.242	-0.568	-0.043	-0.093	40.6563
CC(C)(C)C(OC1=CC(N2N=CC=C2)=CC=C1)=O	OCOR	0.913	1.407	1.384	0.323	-0.56	-0.2376	-0.03987	-802.864	0.342	-0.534	0.261	-0.563	0.043	-0.023	50.7279
FC1=CC=CC(OC(C(C)(C)C)=O)=C1	OCOR	0.916	1.395	1.392	0.325	-0.562	-0.25557	-0.03171	-677.142	0.423	-0.488	0.215	-0.566	0.012	-0.07	49.8249
CC(C)(C)C(OC1=CC=C(C(C)(C)C)C=C1)=O	OCOR	0.905	1.403	1.385	0.301	-0.563	-0.24086	-0.01953	-735.061	0.451	-0.493	0.222	-0.564	-0.071	-0.069	54.0712
CC(C)(C)C(OC1=CC(OCO2)=C2C=C1)=O	OCOR	0.903	1.432	1.356	0.302	-0.565	-0.21646	-0.0185	-766.415	0.408	-0.527	0.257	-0.567	-0.061	-0.036	51.6007
O=C(N(C)C)OC1=CC=C2C(C=CC=C2)=C1	OCOR	0.913	1.509	1.272	0.32	-0.572	-0.22219	-0.04769	-708.266	0.366	-0.532	0.253	-0.572	0.021	-0.04	57.7441
O=C(OC(C)(C)C)OC1=CC=C2C(C=CC=C2)=C1	OCOR	0.881	1.454	1.336	0.308	-0.543	-0.22786	-0.06219	-806.728	0.339	-0.515	0.249	-0.544	0.028	-0.027	55.9989
O=C(OC1=CC=CC=C1)N(C)C	OCOR	0.914	1.397	1.392	0.314	-0.572	-0.24239	-0.01231	-554.662	0.389	-0.495	0.303	-0.567	-0.064	-0.082	60.2428
O=C(OC1=CC2=CC=C(C)C=C2C=C1)N(C)C	OCOR	0.911	1.506	1.276	0.316	-0.572	-0.21816	-0.04424	-747.562	0.371	-0.532	0.261	-0.572	0	-0.04	57.4918
O=C(OC1=CC2=CC=C([Si](C)(C)C)C=C2C=C1)N(C)C	OCOR	0.914	1.505	1.274	0.322	-0.572	-0.22114	-0.04813	-1116.86	0.373	-0.534	0.245	-0.571	0.026	-0.039	55.1813
O=C(OC1=CC2=CC(N(C)C)=CC=C2C=C1)N(C)C	OCOR	0.914	1.506	1.273	0.319	-0.57	-0.18969	-0.03531	-842.172	0.32	-0.553	0.421	-0.6	-0.103	0.013	55.3984
O=C(OC1=CC2=CC=C(C(OC)=O)C=C2C=C1)N(C)C	OCOR	0.928	1.493	1.271	0.327	-0.563	-0.22876	-0.06499	-936.112	0.374	-0.519	0.227	-0.57	0.053	-0.037	64.085
O=C(OC1=CC2=CC=C(OC)C=C2C=C1)N(C)C	OCOR	0.915	1.507	1.268	0.304	-0.57	-0.20537	-0.04528	-822.76	0.382	-0.526	0.26	-0.571	-0.034	-0.043	53.9646
O=C(OC1=CC2=CC(OC)=CC=C2C=C1)N(C)C	OCOR	0.919	1.511	1.265	0.32	-0.57	-0.20894	-0.04419	-822.761	0.338	-0.539	0.249	-0.571	0.053	-0.03	53.7104
O=C(OC1=CC2=CC=CN=C2C=C1)N(C)C	OCOR	0.925	1.499	1.272	0.319	-0.567	-0.23486	-0.06093	-724.314	0.383	-0.505	0.259	-0.569	-0.004	-0.06	57.3895
O=C(OC1=CC2=CC=CC=C2N=C1)N(C)C	OCOR	0.93	1.502	1.257	0.271	-0.565	-0.23534	-0.0604	-724.313	0.338	-0.507	0.22	-0.568	-0.016	-0.055	57.409
O=C(OC1=CC2=CC=C(CCCOC)C=C2C=C1)N(C)C	OCOR	0.918	1.498	1.276	0.313	-0.57	-0.2167	-0.0447	-940.628	0.376	-0.524	0.261	-0.571	-0.011	-0.045	52.3751
O=C(OC1=CC2=CC=C(C3=CC=C(OC)C(OC)=C3)C=C2C=C1)N(C)C	OCOR	0.912	1.506	1.272	0.318	-0.572	-0.20105	-0.04928	-1168.24	0.37	-0.548	0.238	-0.571	0.028	-0.025	48.3239
O=C(OC1=CC=C(C(C2=CC=CC=C2)=O)C=C1)N(C)C	OCOR	0.931	1.387	1.371	0.337	-0.567	-0.24759	-0.07186	-898.971	0.381	-0.516	0.229	-0.569	0.064	-0.049	53.0597
O=C(OC1=CC=C(C2=CC=CC=N2)C=C1)N(C)C	OCOR	0.92	1.387	1.379	0.323	-0.57	-0.2286	-0.05066	-801.701	0.405	-0.514	0.196	-0.571	0.045	-0.055	55.8929
O=C(OC1=CC(C=C(OC(C(C)(C)C)=O)C=C2)=C2C=C1)N(C)C	OCOR	0.905	1.51	1.276	0.314	-0.563	-0.22444	-0.05054	-1053.98	0.34	-0.542	0.213	-0.565	0.075	-0.019	46.2933
O=C(OC/C=C/C1=CC=CC=C1)OC(C)(C)C	OCOR	0.836	1.036	0.924	-0.076	-0.589	-0.24585	-0.05219	-769.782	-0.119	-0.569	-0.096	-0.592	0.063	-0.017	22.4222
O=C(OC/C=C/C1=CC=CC=C1)C	OCOR	0.857	1.034	0.931	-0.083	-0.559	-0.24528	-0.05439	-576.679	-0.121	-0.544	-0.109	-0.568	0.064	-0.006	21.6403
[H]C1=CC=CC=C1OC2=CC=CC=C2OC(C(C)(C)C)=O	OCOR	0.95	1.388	1.333	0.274	-0.56	-0.23501	-0.03274	-884.077	0.31	-0.522	0.216	-0.572	0.022	-0.026	37.5169
O=C(OC1=CC=CC=C1)C	OCOR	0.915	1.397	1.397	0.294	-0.547	-0.2621	-0.03243	-460.024	0.42	-0.483	0.29	-0.559	-0.122	-0.052	59.4634
O=C(OC1=CC=CC=C1)OC(C)(C)C	OCOR	0.898	1.402	1.402	0.306	-0.544	-0.25752	-0.2275	-653.125	0.446	-0.503	0.262	-0.548	-0.096	-0.037	59.1014
O=C(OC1=CC=CC=C1)C(F)(F)F	OCOR	0.878	1.411	1.406	0.297	-0.547	-0.27118	-0.07928	-757.748	0.507	-0.515	0.335	-0.61	-0.248	0.031	44.5343
O=C(OC/C=C/C1=CC=CC=C1)OC	OCOR	0.84	1.038	0.927	-0.079	-0.55	-0.24339	-0.05052	-651.903	-0.12	-0.531	-0.112	-0.561	0.074	-0.008	25.9475
CC(OC(OC/C=C/C1=CC=CC=C1)=O)(C)C	OCOR	0.836	1.036	0.924	-0.076	-0.589	-0.24585	-0.05219	-769.782	-0.119	-0.569	-0.096	-0.592	0.063	-0.017	22.4222
O=C(OC(C)(C)C)OC1=CC2=CC=CC=C2C=C1	OCOR	0.881	1.454	1.336	0.308	-0.543	-0.22786	-0.06219	-806.728	0.339	-0.515	0.249	-0.544	0.028	-0.027	55.9989
O=C(N(C)C)OC1=CC2=CC=CC=C2C=C1	OCOR	0.913	1.509	1.272	0.32	-0.572	-0.22219	-0.04769	-708.266	0.366	-0.532	0.253	-0.572	0.021	-0.04	57.7441
O=C(C(C)C)OC1=CC=C2C(C=CC=C2)=C1	OCOR	0.919	1.503	1.275	0.299	-0.545	-0.23548	-0.06243	-692.207	0.368	-0.519	0.237	-0.549	-0.007	-0.022	50.3212
C[C@H](OC(C(C)(C)C)=O)C1=CC2=CC=CC=C2C=C1	OCOR	0.83	1.012	0.999	0.117	-0.58	-0.22903	-0.05286	-810.091	0.076	-0.575	0.104	-0.567	0.054	-0.018	25.3589
O=C(OC1=CC2=CC=CC=C2C=C1)C	OCOR	0.916	1.508	1.276	0.296	-0.547	-0.23743	-0.06338	-613.628	0.364	-0.525	0.235	-0.55	-0.007	-0.019	56.9208
CC(OC1=CC2=CC=CC=C2C=C1)=O	OCOR	0.916	1.508	1.276	0.296	-0.547	-0.23743	-0.06338	-613.628	0.364	-0.525	0.235	-0.55	-0.007	-0.019	56.9208
O=C(OC1=CC=CC2=CC=CC=C21)N(CC)CC	OCOR	0.916	1.502	1.239	0.34	-0.578	-0.21903	-0.0481	-786.848	0.434	-0.536	0.219	-0.573	0.027	-0.047	55.7963
O=C(N(CC)CC)OC1=CC=CC2=CC=CC=C21	OCOR	0.916	1.502	1.239	0.34	-0.578	-0.21903	-0.0481	-786.848	0.434	-0.536	0.219	-0.573	0.027	-0.047	55.7963
O=C(OC1=CC2=CC=CC=C2C=C1)OC(C)(C)C	OCOR	0.898	1.515	1.275	0.313	-0.579	-0.22945	-0.05393	-806.725	0.37	-0.544	0.247	-0.583	0.009	-0.031	53.802
O=C(N(CC)CC)OC1=CC2=CC=CC=C2C=C1	OCOR	0.915	1.508	1.272	0.319	-0.572	-0.22171	-0.04742	-786.85	0.36	-0.531	0.261	-0.572	0.017	-0.041	56.4608
O=C(OC1=CC(C=CC=C2)=C2C=C1)C(C)(C)C	OCOR	0.889	1.466	1.328	0.317	-0.577	-0.22324	-0.05837	-731.506	0.364	-0.549	0.258	-0.58	0.012	-0.025	53.6044
O=C(C(C)(C)C)OC1=CC2=CC=CC=C2C=C1	OCOR	0.889	1.466	1.328	0.317	-0.577	-0.22324	-0.05837	-731.506	0.364	-0.549	0.258	-0.58	0.012	-0.025	53.6044
CC(C)(C)C(OC1=CC=C2C(C=CC=C2)=C1)=O	OCOR	0.889	1.466	1.328	0.317	-0.577	-0.22324	-0.05837	-731.506	0.364	-0.549	0.258	-0.58	0.012	-0.025	53.6044
CCC(OC)C1=CC2=CC=CC=C2C=C1	OR	0.897	0.99	0.988	0.124	-0.585	-0.22467	-0.04916	-618.155	0.1	-0.578	0.126	-0.613	0.022	0.021	35.2234
COCCOC(C1=CC=CC=C1)C2=CC3=CC=CC=C3C=C2	OR	0.899	0.985	0.979	0.117	-0.593	-0.22162	-0.04595	-924.334	0.095	-0.601	0.237	-0.619	-0.098	0.034	18.6753
COC(C1=CC=CC=C1)C2=CC3=CC=CC=C3C=C2	OR	0.906	0.984	0.979	0.112	-0.576	-0.21997	-0.04438	-770.554	0.091	-0.589	0.23	-0.607	-0.097	0.044	25.3589
O=C(OCC)N1C2=CC=CC=C2C=CC1OCC	OR	0.902	1.016	0.921	0.288	-0.585	-0.22519	-0.04703	-823.936	0.245	-0.539	0.267	-0.621	0.064	-0.01	11.8424
[H]OC1=CC2=CC=CC=C2C=C1	OR	1.018	1.48	1.247	0.341	-0.666	-0.2175	-0.04669	-461.007	0.388	-0.572	0.292	-0.704	0.002	-0.056	82.183
O=S(OC1=CC=C(C#N)C=C1)(C(F)(F)F)=O	OSO2R	0.897	1.394	1.393	0.29	-0.709	-0.29364	-0.08684	-1285.22	0.453	-0.673	0.138	-0.717	-0.011	-0.028	N/A
O=S(OC1=CC2=CC=CC=C2C=C1)(C3=CC=C(C)C=C3)=O	OSO2R	0.908	1.507	1.278	0.283	-0.716	-0.22906	-0.06034	-1279.85	0.338	-0.703	0.25	-0.731	-0.022	0.002	N/A
CC1=CC=C(S(OC2=CC3=CC=CC=C3C=C2)(=O)=O)C=C1	OSO2R	0.908	1.507	1.278	0.283	-0.716	-0.22906	-0.06034	-1279.85	0.338	-0.703	0.25	-0.731	-0.022	0.002	N/A
CC1=CC=C(S(OC2=CC3=C(C=C2)C=CC=C3)(=O)=O)C=C1	OSO2R	0.908	1.507	1.278	0.283	-0.716	-0.22906	-0.06034	-1279.85	0.338	-0.703	0.25	-0.731	-0.022	0.002	N/A
O=S(OC1=CC(C=CC=C2)=C2C=C1)(C(F)(F)F)=O	OSO2R	0.88	1.513	1.283	0.274	-0.711	-0.24325	-0.06898	-1346.58	0.326	-0.698	0.203	-0.717	0.019	-0.007	N/A
O=S(OC1=CC=C(OC)C=C1)(C(F)(F)F)=O	OSO2R	0.878	1.414	1.373	0.238	-0.709	-0.24594	-0.03556	-1307.47	0.408	-0.689	0.176	-0.726	-0.108	-0.003	N/A
O=S(OC1=CC=C(C#N)C=C1)(C2=CC=C(C)C=C2)=O	OSO2R	0.927	1.387	1.385	0.305	-0.714	-0.27408	-0.07525	-1218.49	0.398	-0.694	0.232	-0.731	-0.02	-0.003	N/A
O=S(OC1=C2C=CC=CC2=CC=C1)(C)=O	OSO2R	0.902	1.511	1.239	0.308	-0.728	-0.23075	-0.05887	-1048.86	0.427	-0.71	0.182	-0.731	0.007	-0.015	N/A
CS(OC1=CC=CC2=CC=CC=C21)(=O)=O	OSO2R	0.902	1.511	1.239	0.308	-0.728	-0.23075	-0.05887	-1048.86	0.427	-0.71	0.182	-0.731	0.007	-0.015	N/A
CS(OC1=CC=C(C(OC)=O)C=C1)(=O)=O	OSO2R	0.911	1.393	1.388	0.303	-0.724	-0.27178	-0.06526	-1123.11	0.459	-0.666	0.162	-0.735	-0.015	-0.047	N/A
O=S(OC1=CC=CC2=CC=CC=C21)(N(C)C)=O	OSO2R	0.907	1.509	1.238	0.311	-0.736	-0.22809	-0.0566	-1143.48	0.422	-0.714	0.175	-0.734	0.025	-0.024	N/A

## Sheet: Nucleophile Information
General Information					Neutral Molecule Data						Fragmant Data		Parameter
Molecule SMILES	Type	FGs	Moiety SMILES	LVG SMILES	B(1,2)	B(1,3)	B(1,4)	B(1,5)	Q(C0)	Q(M0)	Q(C-H)	Q(C0)	Δq
Br[Mg]C	R-[Mg]	Alkyl	[CH3]	[Mg+]Br	0.445	0.951	0.951	0.951	-1.375	1.514	-0.806	-1.47	-0.569
C[Mg]I	R-[Mg]	Alkyl	[CH3]	[Mg+]Br	0.445	0.95	0.95	0.95	-1.374	1.444	-0.806	-1.47	-0.568
CC([Si](C#C[Mg]Br)(C(C)C)C(C)C)C	R-[Mg]	Alkynyl	CC(C)[Si](C(C)C)(C(C)C)C#[C]	[Mg+]Br	0.271	2.946	0	0	-0.747	1.624	-0.196	-0.265	-0.551
C=C[Mg]Br	R-[Mg]	Alkenyl	C=[CH]	[Mg+]Br	0.381	2.068	0.934	0	-0.888	1.543	-0.367	-0.672	-0.521
CCCCCCCC[Mg]Br	R-[Mg]	Alkyl	[CH2]CCCCCCC	[Mg+]Br	0.448	1.046	0.937	0.937	-1.074	1.5	-0.575	-1.026	-0.499
CCCCC[Mg]Br	R-[Mg]	Alkyl	[CH2]CCCC	[Mg+]Br	0.447	1.046	0.937	0.937	-1.074	1.5	-0.576	-1.017	-0.498
CCCC[Mg]Br	R-[Mg]	Alkyl	[CH2]CCC	[Mg+]Br	0.447	1.046	0.937	0.937	-1.075	1.501	-0.577	-1.031	-0.498
Br[Mg]C1=CC=C(N(C)C)C=C1	R-[Mg]	Aryl	CN(C)C1=CC=[C]C=C1	[Mg+]Br	0.377	1.425	1.425	0	-0.722	1.547	-0.251	-0.45	-0.471
CN(C)C1=CC=C([Mg]Br)C=C1	R-[Mg]	Aryl	CN(C)C1=CC=[C]C=C1	[Mg+]Br	0.377	1.425	1.425	0	-0.722	1.547	-0.251	-0.45	-0.471
Br[Mg]C1=CC=C(C2=CC=CC=C2)C=C1	R-[Mg]	Aryl	C1(C2=CC=CC=C2)=CC=[C]C=C1	[Mg+]Br	0.362	1.438	1.438	0	-0.667	1.553	-0.204	-0.384	-0.463
CC1=CC=C([Mg]Br)C=C1	R-[Mg]	Aryl	CC1=CC=[C]C=C1	[Mg+]Br	0.366	1.451	1.434	0	-0.676	1.551	-0.214	-0.419	-0.462
Br[Mg]C1=CC=C(OC)C=C1	R-[Mg]	Aryl	COC1=CC=[C]C=C1	[Mg+]Br	0.367	1.461	1.414	0	-0.701	1.551	-0.239	-0.44	-0.462
Br[Mg]C1=CC=C(CCCC)C=C1	R-[Mg]	Aryl	CCCCC1=CC=[C]C=C1	[Mg+]Br	0.362	1.438	1.438	0	-0.667	1.553	-0.213	-0.42	-0.454
Br[Mg]C1=CC=CC=C1	R-[Mg]	Aryl	CC1=CC=[C]C=C1	[Mg+]Br	0.364	1.446	1.446	0	-0.665	1.552	-0.214	-0.419	-0.451
C[Si](C[Mg]Cl)(C)C	R-[Mg]	Alkyl	[CH2][Si](C)(C)C	[Mg+]Cl	0.391	0.928	0.928	0.867	-1.605	1.578	-1.062	-1.492	-0.543
CCCCC[Mg]Cl	R-[Mg]	Alkyl	[CH2]CCCC	[Mg+]Cl	0.452	1.046	0.938	0.938	-1.075	1.534	-0.576	-1.017	-0.499
Cl[Mg]C(C)(C)C	R-[Mg]	Alkyl	C[C](C)C	[Mg+]Cl	0.367	1.442	1.442	0	-0.675	1.551	-0.195	-0.508	-0.48
Cl[Mg]C1=CC=CC=C1	R-[Mg]	Aryl	CC1=CC=[C]C=C1	[Mg+]Cl	0.366	1.446	1.446	0	-0.668	1.588	-0.214	-0.419	-0.454
CCCCC[Mg]I	R-[Mg]	Alkyl	[CH2]CCCC	[Mg+]I	0.444	1.044	0.937	0.937	-1.077	1.433	-0.576	-1.017	-0.501
I[Mg]C1=CC=CC=C1	R-[Mg]	Aryl	C1=CC=CC=[C]1	[Mg+]I	0.359	1.446	1.446	0	-0.674	1.483	-0.205	-0.415	-0.469
CCCCC[Zn]Br	R-[Zn]	Alkyl	[CH2]CCCC	[Zn+]Br	0.664	1.042	0.923	0.923	-0.945	1.031	-0.576	-1.017	-0.369
Cl[Zn]C1=CC=CC=C1	R-[Zn]	Aryl	CC1=CC=[C]C=C1	[Zn+]Cl	0.631	1.434	1.433	0	-0.559	1.118	-0.214	-0.419	-0.345
O=C(C1=CC=CC(C[Zn](Cl)(Cl)[Li])=C1)CCCC	R-[Zn]	Benzyl	O=C(CCCC)C1=CC=CC([CH2])=C1	Cl[Zn+]([Li])Cl	0.606	1.079	0.92	0.919	-0.929	1.021	-0.598	-0.68	-0.331
I[Zn]C1=CC=CC=C1	R-[Zn]	Aryl	CC1=CC=[C]C=C1	[Zn+]I	0.597	1.438	1.438	0	-0.534	0.975	-0.214	-0.419	-0.32
C[Zn]C	R-[Zn]	Alkyl	[CH3]	[Zn+]C	0.613	0.943	0.943	0.943	-1.238	1.129	-0.806	-1.47	-0.432
COC1=CC=C([Zn]I)C=C1	R-[Zn]	Aryl	COC1=CC=[C]C=C1	[Zn+]I	0.604	1.448	1.407	0	-0.566	0.973	-0.239	-0.44	-0.327
CC1=CC([Zn]I)=CC(C)=C1	R-[Zn]	Aryl	CC1=C[C]=CC(C)=C1	[Zn+]I	0.604	1.436	1.436	0	-0.515	0.973	-0.188	-0.408	-0.327
C[Zn](C1=CC=CC=C1)(C)([Li])([Li])C	R-[Zn]	Aryl	CC1=CC=[C]C=C1	C[Zn+]([Li])([Li])(C)C	0.527	1.435	1.415	0	-0.571	0.926	-0.214	-0.419	-0.357
CN(C1=CC=C([Zn]Cl)C=C1)C	R-[Zn]	Aryl	CN(C)C1=CC=[C]C=C1	[Zn+]Cl	0.648	1.409	1.408	0	-0.612	1.107	-0.251	-0.45	-0.361
Br[Zn]C1=CC=CS1	R-[Zn]	Aryl	[C]1=CC=CS1	[Zn+]Br	0.594	1.611	1.205	0	-0.786	1.079	-0.383	-0.543	-0.403
Cl[Zn](C1=CC=CC=C1)(Cl)[Li]	R-[Zn]	Aryl	CC1=CC=[C]C=C1	Cl[Zn+]([Li])Cl	0.622	1.432	1.432	0	-0.543	1.023	-0.214	-0.419	-0.329
Br[Zn]C1CCCC1	R-[Zn]	Alkyl	[CH]1CCCC1	[Zn+]Br	0.625	1.023	1.023	0.91	-0.729	1.046	-0.394	-0.692	-0.335
Br[Zn]C1CC1	R-[Zn]	Alkyl	[CH]1CCC1	[Zn+]Br	0.637	1.014	1.014	0.916	-0.74	1.034	-0.383	-0.729	-0.357
Br[Zn]C1CCCCC1	R-[Zn]	Alkyl	[CH]1CCCCC1	[Zn+]Br	0.626	1.025	1.025	0.909	-0.712	1.039	-0.386	-0.665	-0.326
CC(C)[Zn]Br	R-[Zn]	Alkyl	C[CH]C	[Zn+]Br	0.638	1.044	1.044	0.91	-0.703	1.019	-0.374	-0.73	-0.329
[B-](C1=CC=CC=C1)(C2=CC=CC=C2)(C3=CC=CC=C3)C4=CC=CC=C4	R-[B]	Aryl	[C]1=CC=CC=C1	B(C1=CC=CC=C1)(C2=CC=CC=C2)C3=CC=CC=C3	0.844	1.408	1.39	0	-0.205	0.342	-0.205	-0.415	0
B1(C2=C(C=CC=C3)C3=CC=C2)OB(C4=C(C=CC=C5)C5=CC=C4)OB(C6=C(C=CC=C7)C7=CC=C6)O1	R-[B]	Aryl	C12=[C]C=CC=C1C=CC=C2	B1(C2=C3C=CC=CC3=CC=C2)O[B+]OB(C4=C5C=CC=CC5=CC=C4)O1	0.918	1.497	1.231	0	-0.39	1.156	-0.181	-0.359	-0.209
B1(C2=CC=CC=C2)OB(C3=CC=CC=C3)OB(C4=CC=CC=C4)O1	R-[B]	Aryl	[C]1=CC=CC=C1	B1(O[B+]OB(O1)C2=CC=CC=C2)C3=CC=CC=C3	0.918	1.388	1.388	0	-0.409	1.144	-0.205	-0.415	-0.204
C1(B2OC(C=CC=C3)=C3O2)=CC=CC=C1	R-[B]	Aryl	[C]1=CC=CC=C1	C1(O[B+]O2)=C2C=CC=C1	0.935	1.385	1.385	0	-0.399	1.071	-0.205	-0.415	-0.194
COC(C=C1)=CC=C1CCCB2[C@@H]3CCC[C@@H]2CCC3	R-[B]	Alkyl	COC1=CC=C(CC[CH2])C=C1	C12[B+]C(CCC2)CCC1	0.87	1.019	0.885	0.885	-0.851	1.168	-0.579	-0.968	-0.272
C1(CCCB2C3CCCC2CCC3)=CC=CC=C1	R-[B]	Alkyl	[CH2]CCC1=CC=CC=C1	C12[B+]C(CCC2)CCC1	0.829	1.002	0.909	0.909	-0.841	1.207	-0.578	-0.967	-0.263
COC1=CC=C(CCB2C3CCCC2CCC3)C=C1	R-[B]	Alkyl	COC1=CC=C(C=C1)C[CH2]	C12[B+]C(CCC2)CCC1	0.853	1.02	0.887	0.887	-0.86	1.17	-0.584	-0.994	-0.276
CC(C(O1)(C)C)(C)OB1C2=CC=CC=C2	R-[B]	Aryl	[C]1=CC=CC=C1	CC1(C)C(C)(C)O[B+]O1	0.907	1.392	1.392	0	-0.39	1.086	-0.205	-0.415	-0.185
CC(CO1)(C)COB1C2=CC=CC=C2	R-[B]	Aryl	C1=CC=[C]C=C1	CC1(C)CO[B+]OC1	0.898	1.394	1.394	0	-0.38	1.087	-0.205	-0.415	-0.175
CC1=CC=C(B2OCC(C)(C)CO2)C=C1	R-[B]	Aryl	CC1=CC=[C]C=C1	CC1(C)CO[B+]OC1	0.901	1.397	1.381	0	-0.39	1.086	-0.214	-0.419	-0.176
CC(CO1)(C)COB1C2=CC=C(OC)C=C2	R-[B]	Aryl	COC1=CC=[C]C=C1	CC1(C)CO[B+]OC1	0.907	1.402	1.361	0	-0.414	1.084	-0.239	-0.44	-0.175
CC(CO1)(C)COB1C2=CC(OC)=CC=C2	R-[B]	Aryl	COC1=CC=C[C]=C1	CC1(C)CO[B+]OC1	0.897	1.407	1.377	0	-0.36	1.089	-0.183	-0.392	-0.177
CC(C=C1)=CC=C1B(O2)OB(C3=CC=C(C)C=C3)OB2C4=CC=C(C)C=C4	R-[B]	Aryl	CC1=CC=[C]C=C1	CC1=CC=C(B2O[B+]OB(C3=CC=C(C=C3)C)O2)C=C1	0.922	1.39	1.374	0	-0.417	1.141	-0.214	-0.419	-0.203
CC(C=C1)=CC=C1B2OB(C3=CC=C(C)C=C3)OB(C4=CC=C(C)C=C4)O2	R-[B]	Aryl	CC1=CC=[C]C=C1	CC1=CC=C(B2O[B+]OB(C3=CC=C(C=C3)C)O2)C=C1	0.922	1.39	1.374	0	-0.417	1.141	-0.214	-0.419	-0.203
CC1C(C)O[B-](C2=CC=CC=C2)(CCCC)O1	R-[B]	Aryl	[C]1=CC=CC=C1	CC1C(OB(O1)CCCC)C	0.795	1.406	1.4	0	-0.269	0.92	-0.205	-0.415	-0.064
CCCCC1=CC=C(B2OB(C3=CC=C(CCCC)C=C3)OB(C4=CC=C(CCCC)C=C4)O2)C=C1	R-[B]	Aryl	CCCCC1=CC=[C]C=C1	CCCCC1=CC=C(C=C1)B2OB(O[B+]O2)C3=CC=C(C=C3)CCCC	0.922	1.382	1.382	0	-0.416	1.141	-0.213	-0.42	-0.203
CO[B-](C#CC1=CC=CC=C1)(OC)OC	R-[B]	Alkynyl	[C]#CC1=CC=CC=C1	COB(OC)OC	0.822	2.708	0	0	-0.12	1.003	-0.204	-0.318	0.084
COC1=CC=C([B-](OC)(OC)OC)C=C1	R-[B]	Aryl	COC1=CC=[C]C=C1	COB(OC)OC	0.785	1.434	1.388	0	-0.288	1.09	-0.239	-0.44	-0.049
COC1=CC=C(C=C1)B2OB(C3=CC=C(OC)C=C3)OB(C4=CC=C(OC)C=C4)O2	R-[B]	Aryl	COC1=CC=[C]C=C1	COC1=CC=C(B2O[B+]OB(O2)C3=CC=C(C=C3)OC)C=C1	0.928	1.394	1.353	0	-0.439	1.137	-0.239	-0.44	-0.2
COC1=CC=CC(B2OB(C3=CC=CC(OC)=C3)OB(C4=CC(OC)=CC=C4)O2)=C1	R-[B]	Aryl	COC1=CC=C[C]=C1	COC1=CC=CC(B2O[B+]OB(O2)C3=CC(OC)=CC=C3)=C1	0.915	1.421	1.362	0	-0.391	1.147	-0.183	-0.392	-0.208
F[B-](C1=CC=CC=C1)(F)F	R-[B]	Aryl	[C]1=CC=CC=C1	FB(F)F	0.784	1.422	1.41	0	-0.277	1.143	-0.205	-0.415	-0.072
F[B-](F)(F)C1=COC=C1	R-[B]	Heteroaryl	[C]1=COC=C1	FB(F)F	0.78	1.67	1.229	0	-0.381	1.149	-0.312	-0.518	-0.069
FC1=CC=C(B2OB(C3=CC=C(F)C=C3)OB(C4=CC=C(F)C=C4)O2)C=C1	R-[B]	Aryl	FC1=CC=[C]C=C1	FC1=CC=C(C=C1)B2O[B+]OB(O2)C3=CC=C(C=C3)F	0.921	1.385	1.383	0	-0.424	1.143	-0.224	-0.429	-0.2
OB(O)C1=CC=CC=C1	R-[B]	Aryl	C1=CC=CC=[C]1	O[B+]O	0.897	1.397	1.397	0	-0.393	1.077	-0.205	-0.415	-0.188
OB(C1=CC=CC=C1)O	R-[B]	Aryl	C1=CC=CC=[C]1	O[B+]O	0.896	1.397	1.397	0	-0.384	1.071	-0.205	-0.415	-0.179
OB(O)C1=CC=C(C=C1)F	R-[B]	Aryl	FC1=CC=[C]C=C1	O[B+]O	0.896	1.394	1.394	0	-0.402	1.07	-0.224	-0.429	-0.178
COC1=CC=C(B(O)O)C=C1	R-[B]	Aryl	COC1=CC=[C]C=C1	O[B+]O	0.905	1.404	1.364	0	-0.418	1.068	-0.239	-0.44	-0.179
OB(C1=CC=C(OC)C=C1)O	R-[B]	Aryl	COC1=CC=[C]C=C1	O[B+]O	0.905	1.404	1.364	0	-0.418	1.068	-0.239	-0.44	-0.179
OB(C1=C2C(C=CC=C2)=CC=C1)O	R-[B]	Aryl	C12=[C]C=CC=C1C=CC=C2	O[B+]O	0.899	1.508	1.237	0	-0.365	1.08	-0.181	-0.359	-0.184
CC1=CC=C(B(O)O)C=C1	R-[B]	Aryl	CC1=CC=[C]C=C1	O[B+]O	0.899	1.4	1.384	0	-0.393	1.07	-0.214	-0.419	-0.179
[H]C1=CCCC1	R-[H]	Alkenyl	[C]1=CCCC1	[H+]	0.926	1.913	1.034	0	-0.192	0.2	-0.192	-0.404	0
C=CC1=CC=CC=C1	R-[H]	Alkenyl	[CH]=CC1=CC=CC=C1	[H+]	0.941	1.902	0.942	0	-0.351	0.193	-0.351	-0.541	0
C=C([H])CCCCCC	R-[H]	Alkenyl	C=[C]CCCCCC	[H+]	0.921	1.98	1.036	0	-0.168	0.186	-0.168	-0.388	0
C=C	R-[H]	Alkenyl	C=[CH]	[H+]	0.941	2.045	0.941	0	-0.367	0.183	-0.367	-0.672	0
CN1C2=CC=CC=C2N=C1[H]	R-[H]	Aryl	CN1[C]=NC2=CC=CC=C21	[H+]	0.924	1.605	1.153	0	0.25	0.189	0.253	0.023	-0.003
CN1C([H])=NC2=CC=CC=C21	R-[H]	Aryl	CN1[C]=NC2=CC=CC=C21	[H+]	0.924	1.603	1.152	0	0.253	0.189	0.253	0.023	0
FC1=C([H])C(F)=C(F)C(F)=C1F	R-[H]	Aryl	FC1=[C]C(F)=C(C(F)=C1F)F	[H+]	0.907	1.395	1.395	0	-0.342	0.253	-0.342	-0.415	0
FC1=CC(F)=C(F)C=C1F	R-[H]	Aryl	FC1=CC(F)=C([C]=C1F)F	[H+]	0.903	1.398	1.398	0	-0.323	0.25	-0.323	-0.406	0
[H]C1=NC2=CC=CC=C2O1	R-[H]	Aryl	C12=CC=CC=C1O[C]=N2	[H+]	0.921	1.711	1.03	0	0.391	0.19	0.391	0.15	0
C1(CC2=CC=CC=C2)=NC=CC=C1	R-[H]	Benzyl	C1([CH]C2=CC=CC=C2)=NC=CC=C1	[H+]	0.898	1.016	1.014	0.898	-0.442	0.226	-0.436	-0.386	-0.006
C1(CC2=CC=CN=C2)=CC=CN=C1	R-[H]	Benzyl	C1([CH]C2=CC=CN=C2)=CC=CN=C1	[H+]	0.91	1.006	1.005	0.91	-0.427	0.22	-0.426	-0.391	-0.001
C1(CC2=CC=CC=C2)=CC=CC=C1	R-[H]	Benzyl	C1([CH]C2=CC=CC=C2)=CC=CC=C1	[H+]	0.913	1.005	1.005	0.913	-0.422	0.217	-0.422	-0.386	0
C1(CC2=CC=CC=C2)=CC=CN=C1	R-[H]	Benzyl	C1([CH]C2=CC=CC=C2)=CC=CN=C1	[H+]	0.911	1.006	1.005	0.912	-0.424	0.219	-0.424	-0.384	0
C1(CC2=CC=CC=C2)=CC=NC=C1	R-[H]	Benzyl	C1([CH]C2=CC=CC=C2)=CC=NC=C1	[H+]	0.908	1.006	1.005	0.913	-0.427	0.223	-0.427	-0.379	0
C12=CC=CC=C1OC3=C(C=CC=C3)C2	R-[H]	Benzyl	C12=CC=CC=C1OC3=C([CH]2)C=CC=C3	[H+]	0.901	1.014	1.014	0.901	-0.419	0.22	-0.419	-0.413	0
C1(CC2=CC=CC=C2)=CC=CS1	R-[H]	Benzyl	C1([CH]C2=CC=CC=C2)=CC=CS1	[H+]	0.898	1.028	1	0.91	-0.439	0.219	-0.44	-0.4	0.001
O=CC1=CC=CC=C1	R-[H]	Carbonyl	O=[C]C1=CC=CC=C1	[H+]	0.908	1.818	1.053	0	0.415	0.107	0.415	0.052	0
O=CC1CCCCC1	R-[H]	Carbonyl	O=[C]C1CCCCC1	[H+]	0.908	1.872	0.993	0	0.456	0.101	0.456	0.092	0
[H]C(CCC1=CC=CC=C1)=O	R-[H]	Carbonyl	O=[C]CCC1=CC=CC=C1	[H+]	0.907	1.883	1.006	0	0.446	0.097	0.446	0.103	0
CN(C(C=CC=C1)=C1C2)C2=O	R-[H]	Enol	CN1C2=C([CH]C1=O)C=CC=C2	[H+]	0.894	1.019	0.97	0.894	-0.502	0.245	-0.501	-0.474	-0.001
O=C(CC1=CC=C(OC)C=C1)OC	R-[H]	Enol	O=C(OC)[CH]C1=CC=C(C=C1)OC	[H+]	0.893	1.012	0.974	0.912	-0.53	0.232	-0.53	-0.504	0
O=C1C(C(OC)=O)CCC1	R-[H]	Enol	O=C1[C](CCC1)C(OC)=O	[H+]	0.878	0.999	0.954	0.94	-0.445	0.244	-0.445	-0.399	0
O=C1C(C(OCC)=O)CCCO1	R-[H]	Enol	O=C1[C](CCCO1)C(OCC)=O	[H+]	0.882	0.996	0.955	0.941	-0.444	0.238	-0.444	-0.443	0
CC1CCC2=CC=CC=C2C1=O	R-[H]	Enol	C[C]1CCC2=CC=CC=C2C1=O	[H+]	0.879	1.015	0.996	0.972	-0.294	0.221	-0.294	-0.244	0
O=C(CC1=CC=CC=C1)C2=CC=CC=C2	R-[H]	Enol	O=C(C1=CC=CC=C1)[CH]C2=CC=CC=C2	[H+]	0.893	1.015	0.976	0.911	-0.506	0.235	-0.506	-0.443	0
O=C(C([H])C1=CC=CC=C1)C2=CC=CC=C2	R-[H]	Enol	O=C(C1=CC=CC=C1)[CH]C2=CC=CC=C2	[H+]	0.893	1.015	0.976	0.911	-0.506	0.235	-0.506	-0.443	0
O=C1C(C)CC2=CC=CC=C21	R-[H]	Enol	O=C1[C](CC2=CC=CC=C21)C	[H+]	0.885	1.016	0.996	0.959	-0.29	0.229	-0.29	-0.24	0
CC1CC2=CC=CC=C2C1=O	R-[H]	Enol	O=C1[C](CC2=CC=CC=C21)C	[H+]	0.885	1.016	0.996	0.959	-0.29	0.229	-0.29	-0.24	0

## Sheet: Ligand Information
Ligand Name	Ligand SMILES	Ligand Type	TEP value	Buried Volume (Vbur%)
PCy3	P(C1CCCCC1)(C2CCCCC2)C3CCCCC3	Mono-Phosphine	2056.4	30.8
PPhCy2	P(C1CCCCC1)(C2CCCCC2)C3=CC=CC=C3	Mono-Phosphine	2060.6	31
PPh2Cy	P(C1=CC=CC=C1)(C2CCCCC2)C3=CC=CC=C3	Mono-Phosphine	2064.7	31.17
PPh3	P(C1=CC=CC=C1)(C2=CC=CC=C2)C3=CC=CC=C3	Mono-Phosphine	2068.9	31.35
PBu3	CCCCP(CCCC)CCCC	Mono-Phosphine	2060	30.7
P(o-tolyl)3	CC1=C(P(C2=C(C)C=CC=C2)C3=C(C)C=CC=C3)C=CC=C1	Mono-Phosphine	2066.6	29.85
P(iBu)3	CC(CP(CC(C)C)CC(C)C)C	Mono-Phosphine	2058.5	29.65
P(iPr)3	CC(P(C(C)C)C(C)C)C	Mono-Phosphine	2059.2	30.55
P(F-C6H4)3	FC(C=C1)=CC=C1P(C2=CC=C(F)C=C2)C3=CC=C(F)C=C3	Mono-Phosphine	2071	31.4
PMe3	CP(C)C	Mono-Phosphine	2064.1	28.75
PPh2Bn	P(C1=CC=CC=C1)(CC2=CC=CC=C2)C3=CC=CC=C3	Mono-Phosphine	2068	31.5
P(o-anisyl)3	COC(C=CC=C1)=C1P(C2=C(OC)C=CC=C2)C3=C(OC)C=CC=C3	Mono-Phosphine	2066	35.4
P(tBu)3	CC(P(C(C)(C)C)C(C)(C)C)(C)C	Mono-Phosphine	2056.1	35.15
CyJohnPhos	C1(C2=C(P(C3CCCCC3)C4CCCCC4)C=CC=C2)=CC=CC=C1	Mono-Phosphine	2056	42.5
dppm	P(CP(C1=CC=CC=C1)C2=CC=CC=C2)(C3=CC=CC=C3)C4=CC=CC=C4	Bi-Phosphine	2068.2	51.5
dppe	P(CCP(C1=CC=CC=C1)C2=CC=CC=C2)(C3=CC=CC=C3)C4=CC=CC=C4	Bi-Phosphine	2067.1	55.9
dmpe	CP(CCP(C)C)C	Bi-Phosphine	2064.5	53.9
dcype	P(CCP(C1CCCCC1)C2CCCCC2)(C3CCCCC3)C4CCCCC4	Bi-Phosphine	2059.4	57.1
DPEPhos	C1(P(C2=CC=CC=C2)C3=CC=CC=C3)=C(OC4=C(P(C5=CC=CC=C5)C6=CC=CC=C6)C=CC=C4)C=CC=C1	Bi-Phosphine	2068	-
dppp	P(CCCP(C1=CC=CC=C1)C2=CC=CC=C2)(C3=CC=CC=C3)C4=CC=CC=C4	Bi-Phosphine	2066	58
depe	CCP(CCP(CC)CC)CC	Bi-Phosphine	2061.7	54.6
dppf	C1=CC=C(C=C1)P([C-]2C=CC=C2)C3=CC=CC=C3.C1=CC=C(C=C1)P([C-]2C=CC=C2)C3=CC=CC=C3.[Fe+2]	Bi-Phosphine	2067.3	60.5
XPhos	CC(C1=C(C2=CC=CC=C2P(C3CCCCC3)C4CCCCC4)C(C(C)C)=CC(C(C)C)=C1)C	Bi-Phosphine	-	47.7
dppb	P(CCCCP(C1=CC=CC=C1)C2=CC=CC=C2)(C3=CC=CC=C3)C4=CC=CC=C4	Bi-Phosphine	2066.2	63.2
dpppent	P(CCCCCP(C1=CC=CC=C1)C2=CC=CC=C2)(C3=CC=CC=C3)C4=CC=CC=C4	Bi-Phosphine	2065.8	65.6
dpph	P(CCCCCCP(C1=CC=CC=C1)C2=CC=CC=C2)(C3=CC=CC=C3)C4=CC=CC=C4	Bi-Phosphine	2066.1	67.3
dppo	P(CCCCCCCCP(C1=CC=CC=C1)C2=CC=CC=C2)(C3=CC=CC=C3)C4=CC=CC=C4	Bi-Phosphine	2066	60.6
dippf	[H][C-]1C=CC(P(C(C)C)C(C)C)=C1.[H][C-]1C=CC(P(C(C)C)C(C)C)=C1.[Fe+2]	Bi-Phosphine	2060.8	61.5
diop	CC1(C)O[C@@](CP(C2=CC=CC=C2)C3=CC=CC=C3)([H])[C@](CP(C4=CC=CC=C4)C5=CC=CC=C5)([H])O1	Bi-Phosphine	2067	56.6
dcypb	P(CCCCP(C1CCCCC1)C2CCCCC2)(C3CCCCC3)C4CCCCC4	Bi-Phosphine	2057.3	65.1
dcypbz	C1(P(C2CCCCC2)C3CCCCC3)=C(C=CC=C1)P(C4CCCCC4)C5CCCCC5	Bi-Phosphine	2060.6	-
dcypt	C1(P(C2CCCCC2)C3CCCCC3)=CSC=C1P(C4CCCCC4)C5CCCCC5	Bi-Phosphine	2060.6	64.7
SegPhos	C1(C2=C(COC3)C3=CC=C2P(C4=CC=CC=C4)C5=CC=CC=C5)=C6COCC6=CC=C1P(C7=CC=CC=C7)C8=CC=CC=C8	Bi-Phosphine	2065.5	59.7
Xantphos	CC1(C)C2=C(OC3=C1C=CC=C3P(C4=CC=CC=C4)C5=CC=CC=C5)C(P(C6=CC=CC=C6)C7=CC=CC=C7)=CC=C2	Bi-Phosphine	2067.8	59.2
dppen	P(/C=C\P(C1=CC=CC=C1)C2=CC=CC=C2)(C3=CC=CC=C3)C4=CC=CC=C4	Bi-Phosphine	2068.5	54.2
(S,S)-Chirophos	C[C@@H]([C@H](C)P(C1=CC=CC=C1)C2=CC=CC=C2)P(C3=CC=CC=C3)C4=CC=CC=C4	Bi-Phosphine	2065.7	-
(R,R)-Me-Duphos	C[C@@H]1CC[C@@H](C)P1C2=CC=CC=C2P3[C@H](C)CC[C@H]3C	Bi-Phosphine	2063.3	52
(R,R)-BDPP	C[C@H](C[C@@H](C)P(C1=CC=CC=C1)C2=CC=CC=C2)P(C3=CC=CC=C3)C4=CC=CC=C4	Bi-Phosphine	2064.8	-
dcypf	C1(CCCCC1)P(C2CCCCC2)[C-]3C=CC=C3.C4(CCCCC4)P(C5CCCCC5)[C-]6C=CC=C6.[Fe+2]	Bi-Phosphine	2059	61.8
BINAP	C1(C2=C3C=CC=CC3=CC=C2P(C4=CC=CC=C4)C5=CC=CC=C5)=C6C=CC=CC6=CC=C1P(C7=CC=CC=C7)C8=CC=CC=C8	Bi-Phosphine	2066.5	59.6
IPr	CC(C)C(C=CC=C1C(C)C)=C1N2[C]N(C3=C(C(C)C)C=CC=C3C(C)C)C=C2	Mono-NHC	2050.5	37.1
ICy	C1(N2[C]N(C=C2)C3CCCCC3)CCCCC1	Mono-NHC	2049.7	23.8
IMes	CC1=C(N2C=CN(C3=C(C)C=C(C)C=C3C)[C]2)C(C)=CC(C)=C1	Mono-NHC	2050.5	31.2
SIPr	CC(C1=C(N2CCN(C3=C(C(C)C)C=CC=C3C(C)C)[C]2)C(C(C)C)=CC=C1)C	Mono-NHC	2051.5	36.9
SIMes	CC1=C(C(C)=CC(C)=C1)N2CCN([C]2)C3=C(C=C(C=C3C)C)C	Mono-NHC	2051	37.7
ItBu	CC(N1C=CN(C(C)(C)C)[C]1)(C)C	Mono-NHC	2050.6	35.6
IAd	N1([C]N(C=C1)C23C[C@H]4C[C@H](C[C@H](C4)C3)C2)C56C[C@H]7C[C@H](C[C@H](C7)C6)C5	Mono-NHC	2046	35.7

## Sheet: Base Information
Base Name	pKa value of conjugation acid
KF	3.17
CsF	3.17
Na2CO3	10.3
K2CO3	10.3
Rb2CO3	10.3
Cs2CO3	10.3
Na3PO4	12.3
K3PO4	12.3
NaOH	14
KOH	14
NaH	35
DABCO	8.82
TMP	11.07
NEt3	10.65
NHEt2	10.98
Quinuclidine	11
Cy2NMe	11.03
DIPEA	10.75
NaOMe	15.5
NaOEt	16
LiOtBu	17
NaOtBu	17
KOtBu	17
NaHDMS	26
KHDMS	26
o-tolylMgBr	43
iPrMgCl	51
BuLi	50
MeMgCl	48
MeMgBr	48
MeMgI	48
MeZnCl	48
Reference: https://organicchemistrydata.org/hansreich/resources/pka/
